# Supplementary material
Source: publisher figshare collection journal article supplement (https://acs.figshare.com/ndownloader/files/3699709)
Supplement: Supplementary file 1 [file 3699709]

## Sheet: S2a
Table S2: Proteins identified in the Bacillus subtilis vegetative cell membrane fraction
a. Bacillus subtilis proteins overview
			Replicate 1		Replicate 2		Replicate 3
UniprotKB	Gene name	Protein mass	Score	# MSMS spectra	Score	# MSMS spectra	Score	# MSMS spectra
C0H3Q1	ytzI	6632					30	2
C0H3R7	yvzJ	8161					74	1
C0H3U2	yyzH	5798					25	1
C0H3V2	mtlF	15794					27	2
C0H3W1	ydzQ	5475					27	4
C0H3X4	yezG	18011			35	3
C0H3X7	mprF	96317	211	12	28	1	37	1
C0H402	ykzP	5796			33	4	39	6
C0H423	yozV	9155	44	1			59	1
C0H440	youA	21699			29	3	30	1
C0SP78	ydfM	32891	72	3	60	3
C0SP86	sftA	106928	27	1
C0SP89	yoaH	60966	81	2			65	1
C0SP93	accD	32242	189	8	186	8
C0SP94	yhfQ	35524	887	40	480	13	320	13
C0SP98	ykfD	37546	662	29	321	12	318	14
C0SPA3	ylxW	26026	21	1
C0SPA7	yukB	171971	135	9	33	2	26	2
C0SPB0	ytcI	59573	150	6	169	5	60	2
C0SPB2	ywtG	49276	87	4
C0SPB4	yhaQ	33951	150	13	96	7	36	3
C0SPB6	ssbB	12626					356	12
O05227	mrpG	13731			33	1	83	2
O05229	mrpD	53442	29	1
O05236	yugG	18749	45	2	41	1	47	1
O05239	yugJ	42877	23	1
O05248	yugP	24679	206	7	49	2	187	6
O05250	malK	59064	115	6			71	4
O05251	malR	26948	34	1
O05252	yufN	38395	3027	92	2318	49	1917	55
O05253	yufO	56322	752	34	193	10	455	19
O05254	yufP	36877	166	6	82	2	40	2
O05255	yufQ	33716	148	4	86	3	38	1
O05256	maeN	48192	26	1
O05260	mrpC	12277	48	1	31	1	73	2
O05267	yumB	45133	29	2	48	2
O05268	yumC	36932	63	3
O05389	yrbE	37935			22	1
O05390	csbX	48057	71	2
O05392	ruvA	22570	47	2
O05399	yrhG	28584					54	1
O05406	yrhP	23374	27	1
O05503	ydhK	22579	546	19	368	14	231	10
O05509	gmuR	27471	62	1
O05516	tsaB	25284			21	1
O05518	tsaD	36933	41	2
O05522	tatAy	6061	24	1			58	3
O05523	tatC2	29037	51	1			46	1
O05525	ydiL	27629	39	1			32	1
O06473	yfmO	41537	20	3
O06475	yfmQ	16912	24	1
O06476	yfmR	71077	34	2
O06477	yfmS	30306	183	11	96	8	53	4
O06478	yfmT	53402	341	15	305	12	141	7
O06481	yfnC	43688	32	2			60	1
O06491	gatA	52802	144	5	400	13	60	3
O06493	opuE	53248	31	2	46	2
O06714	sbcC	129240	165	15			37	4
O06724	yisK	33296	26	2			29	2
O06725	yisL	13213	116	3	43	1	132	3
O06744	yitI	17047					25	1
O06745	yitJ	68341	40	1	487	19	41	1
O06746	yitK	18191	64	2	73	2
O06752	yitQ	22039	43	2
O06753	yitR	11056	34	1			65	1
O06965	yvcA	28082	155	9	93	2	150	6
O06967	bmrA	64535	686	36	236	10	300	19
O06973	yvcJ	33944	67	3	141	5
O06974	mgfK	34779	33	3
O06976	crh	9321			42	1
O06979	yvcQ	40212	66	4			46	3
O06980	yvcR	29134	45	2	29	1	19	1
O06986	yvdD	21154	39	2	141	4
O07020	lutA	27002	658	19	832	28	380	16
O07021	lutB	53953	1062	39	763	21	844	30
O07079	yrdA	18905			86	3
O07084	czcD	34255					25	2
O07085	czcO	39155					23	1
O07516	yhaH	13058	150	6	141	4	333	15
O07520	yhaL	8491	25	1
O07521	yhaM	35660	123	6	125	2	59	1
O07523	yhaP	45446	285	12	44	2	193	6
O07539	yhaX	32444	32	1	332	8
O07543	yheB	42881	134	8	36	1	61	3
O07544	yheC	42242			45	1
O07549	yheH	76428					32	2
O07550	yheI	65070	57	2
O07556	yhjB	52784	178	9	50	2	54	1
O07557	yhjC	7376	22	1
O07573	nsrR	16770	45	2	36	1	23	1
O07576	yhdG	49906	513	12	515	10	288	6
O07581	yhdL	40612	134	11	92	7	71	4
O07584	plsC	22023	207	15	62	5	223	12
O07585	yhdP	49995	577	28	198	7	281	12
O07587	yhdR	44032	104	7
O07595	cobB	27685	22	1	33	1
O07597	dat	31220	203	5	118	4
O07598	yhaA	43478	142	2	132	4
O07604	yhfF	15393					27	5
O07605	gltT	46004	2508	74	1673	49	710	24
O07608	lplJ	38111	274	12	74	1	158	4
O07609	yhfK	22803	48	1
O07611	yhfM	14998	20	3
O07617	phoE	22151	26	2
O07620	bioY	19997	284	6			145	3
O07621	hemAT	48738	719	35	389	24	242	28
O07631	typA	68574	907	29	417	13	111	3
O07632	ylaH	11610	65	1
O07634	ylaJ	23427	27	1	66	2
O30472	yodL	12104					27	1
O30509	gatB	53691	376	15	520	14	123	6
O30601	yosP	38213	21	2
O31423	skfB	46296	44	1	30	1
O31425	skfC	56541	473	28	289	18	112	7
O31427	skfE	27105	36	3	44	2	24	1
O31428	skfF	52125	30	1	39	1
O31429	skfG	18840			50	1
O31430	skfH	16447	47	1
O31446	ybfF	35458	341	12	58	2	164	6
O31451	ybfJ	14557	100	3	88	3	103	3
O31458	gamA	27386			25	1
O31461	ilvE	39708	29	1			41	1
O31462	ybgF	51139	52	4
O31489	ydcI	81531	23	4
O31498	ligA	75115			63	3
O31500	yerO	32939	60	1
O31501	swrC	113435	1648	64	1910	61	1043	36
O31502	dagK	33373	72	2
O31529	yesZ	74736			19	1
O31534	hmoA	12565	91	4			43	2
O31539	yetJ	23813	192	7			100	4
O31543	yfjQ	37878	47	4	71	1
O31557	yfjB	43742					29	1
O31562	yfiT	20654			24	2
O31567	yfiY	36339	2790	94	1194	37	569	24
O31568	yfiZ	35454	83	3
O31569	yfhA	36160	101	2
O31570	yfhB	32223			75	3	35	1
O31571	yfhC	22441	25	1
O31574	yfhF	33920					34	1
O31580	yfhL	12052	52	3			54	3
O31581	yfhM	32852	98	4	159	7	46	2
O31582	yfhO	98424	90	4
O31593	yhbJ	23608	108	5	35	1
O31601	yjbC	23106					26	1
O31612	ppnK1	30222			34	2
O31615	yjbQ	67482	81	3	67	2	52	2
O31618	thiG	27119	41	1	110	4	48	2
O31619	thiF	36890	74	4	61	1	78	2
O31620	thiD	29163	370	12	153	6	105	5
O31623	yjcA	13255	55	1	34	1
O31629	yjcG	19706	89	6	55	2
O31630	yjcH	27899			30	2
O31631	metI	41907	42	1
O31633	yjcK	20912			32	2
O31634	yjcL	43293	51	5	68	2	104	2
O31635	yjcM	46660	45	12	281	16	135	8
O31636	yjcN	12053	116	4	244	12	620	17
O31638	yjcP	20131	275	17	176	6	442	14
O31648	yjdG	19336			29	1
O31649	yjdH	15249			63	1
O31654	sigI	29289	82	2
O31655	rsgI	43620	53	3			44	3
O31657	htpX	32845	392	9	578	13	119	3
O31662	mtnA	39064	2378	68	1389	39	1033	39
O31663	mtnK	45228	1856	67	1486	49	951	38
O31664	mtnU	29666	257	11	196	6	99	3
O31666	mtnW	44186	99	4	35	2	28	1
O31667	mtnX	27497	31	1	97	6
O31669	mtnD	20811	92	5
O31671	kinD	57011	57	2			67	2
O31675	queC	24969	76	2	81	1	27	1
O31677	queE	27276			24	2
O31688	zosA	68864	50	2			398	20
O31689	ykvY	40423			108	3	28	1
O31709	yknW	24217	141	8	304	10	314	15
O31710	yknX	41682	1295	55	631	23	584	31
O31711	yknY	25370	76	3
O31712	yknZ	42155	151	9	82	4	27	3
O31716	ykpA	61188	133	7	225	9
O31717	ykpB	33665			92	3
O31723	ylmA	29738	164	5	145	4	70	3
O31724	ylmB	47523	28	1			25	1
O31728	sepF	17433	29	1
O31729	ylmG	10358	163	6	27	1	158	5
O31738	ylqC	9057					43	1
O31742	rplS	13379	404	18	316	17	589	31
O31743	rbgA	32023	71	1	154	4	41	1
O31745	ylqG	63103	37	1
O31749	pyrH	26124	375	11	300	5	186	6
O31751	uppS	29758	114	4	52	3
O31752	cdsA	30306					25	1
O31753	dxr	42738	106	4	45	1
O31754	rasP	46771	625	26	187	8	311	9
O31755	proS	63436	93	8	252	10	53	2
O31760	rnjB	61251	228	7	935	30	121	9
O31764	ymfF	48231	34	3
O31771	ymfM	32416	333	17	136	4	296	17
O31773	pbpX	43887	152	4	68	1	110	1
O31774	rny	58940	944	44	726	27	726	37
O31778	miaB	58532	189	10	122	6	150	6
O31782	pksN	612061	81	11
O31784	pksR	286298	149	10	21	2
O31785	pksS	46870	40	3
O31793	ymaG	10100	130	5
O31796	hfq	8509	39	1			57	2
O31797	ymzC	10559	26	1			19	1
O31804	tatAc	6840					50	1
O31810	yndF	45024					30	3
O31812	yndH	24081	40	1
O31823	yngC	21912	86	3			91	3
O31827	ppsE	145155	34	2
O31829	yoaF	11097	33	1			125	5
O31834	yozG	9429					90	2
O31847	yozO	13244	569	13	100	2	320	9
O31850	yojN	33573	24	1
O31853	yojK	45861					34	3
O31856	rsbRC	32146			91	6
O31875	nrdEB	124998	126	9
O31878	yosK	8143	19	1
O31928	yopJ	16070			55	1	42	1
O31929	yopI	20596	167	4	107	2	97	2
O31930	yopH	20465	32	3	95	3	153	6
O31942	yonS	22296	441	17	536	18	417	17
O31974	yomK	16889	252	11	296	12	490	22
O31975	yomJ	25333	61	2
O31976	yomI	252140			31	3	27	3
O31989	yolF	12304	952	36	728	24	1082	40
O32000	yokG	40888	172	9	127	7	97	3
O32001	yokF	33268	162	7
O32002	yokE	18240	157	5	66	1	152	4
O32003	yokD	31009	100	2			107	2
O32005	yokB	27548	88	3			68	2
O32006	yokA	63441					26	9
O32022	yqzD	13315	117	3	102	3	226	9
O32023	yqzC	17017	221	5	259	7	535	13
O32031	yrrS	25318	497	17	212	5	448	16
O32033	udk	24472	49	2
O32034	yrrO	48055	44	1	32	1
O32037	tcdA	28237			102	4
O32038	aspS	66105	787	34	894	32	332	15
O32039	hisS	48386	130	7	519	19	96	4
O32045	yrvD	12227	117	3	156	3	171	5
O32047	secDF	81603	2250	82	2852	103	1824	62
O32052	yrbF	9897	526	29	292	13	534	28
O32057	yrzF	24818			30	6
O32060	yrbD	51590	29	1
O32065	ytzB	11716			47	1	96	2
O32074	thiT	20609	78	2
O32075	yuaI	19830	21	1
O32076	yuaG	55959	1524	61	1070	31	738	34
O32082	yubF	10005	238	7	305	8	339	7
O32086	yubA	43697	214	9	79	4	107	4
O32087	yuzA	8518	43	2	124	5	48	2
O32095	yueF	40984	184	10	48	2	53	3
O32099	yueD	27149	57	1	149	3
O32101	yueB	119908	107	9	151	7	78	4
O32104	bioYB	21581	99	5	56	2
O32105	yuiF	46135	103	4	70	2	57	3
O32106	pepA	53909	38	1	76	4
O32107	yuiD	17171	112	4	222	6	209	7
O32117	yutJ	39751	203	11			118	5
O32129	lipA	34299	80	4	108	6
O32131	yunB	27896			26	1
O32151	yurJ	41382	415	12	241	7	320	11
O32153	frlD	31308	52	3	136	3	69	1
O32154	yurM	34303	237	12	151	5	45	4
O32155	yurN	32867	202	6	156	5	25	1
O32156	yurO	48053	1353	58	988	29	738	33
O32157	frlB	37024	518	22	612	17	294	8
O32162	sufB	52981	168	5	298	11	114	4
O32163	nifU	16327	22	2
O32164	csd	45065	36	2	85	3	31	2
O32165	sufD	48264	77	2	52	1
O32167	metQ	30393	4562	179	2892	133	1456	64
O32168	metP	23741	226	11	89	4	134	9
O32169	metN	37976	935	32	358	12	401	12
O32182	yusP	57965	26	2			58	2
O32188	yusV	30817	38	2
O32193	cssS	52122	51	3
O32199	liaF	27007	71	3
O32201	liaH	25682			28	3	26	5
O32204	yvsH	50397	64	4	61	1
O32208	yvgL	28395	30	2
O32210	yvgN	31700	34	2
O32212	nhaK	75294	97	6			137	7
O32213	cysI	65168	118	6
O32214	cysJ	67502	42	3
O32217	bdbC	15989	79	2			53	2
O32218	bdbD	25004	977	37	1024	28	1004	32
O32219	cadA	75643	46	2			419	22
O32220	copA	86199	278	9	280	15	133	11
O32223	yvaA	40145	52	3	34	2
O32224	azoR2	23257	55	1
O32231	rnr	88809	208	14	304	18
O32232	est	28346					57	1
O32233	secG	7991	201	4	90	1	346	6
O32234	yvaM	29731					27	1
O32239	yvaQ	62792	167	4	137	3	65	1
O32241	sdpI	23392	70	4	101	4	71	4
O32243	opuCC	34049	1095	29	1150	34	611	20
O32245	yvbH	23844	95	2	50	1	82	2
O32246	yvbI	26192	480	21	234	8	247	14
O32247	yvbJ	67518	1336	55	1245	37	845	31
O32257	yvbW	49260	154	3			47	1
O32259	lutC	26375	647	24	612	20	682	27
O32271	tuaD	50126	23	1
O34305	ytoQ	16781	61	1
O34308	ytkK	28185			43	2
O34309	pps	97416	37	3	71	7
O34311	ykoW	90679	39	3
O34314	ytlC	29341	82	3			74	21
O34318	yloU	13239	65	2	90	2	119	3
O34328	gmk	23261	103	3	111	3
O34334	yjoA	17839			107	2
O34338	mntB	27921					2214	82
O34340	fabF	44148	36	3
O34341	yebC	30712	116	6	117	6	125	4
O34344	sdpC	22321					47	1
O34347	argG	45074	733	36	322	15	79	7
O34348	yfmC	35113	1085	38	1100	32	385	18
O34350	ytmI	20455					26	6
O34353	ydjN	39686	120	4	25	3	69	4
O34358	htrA	47686	70	5
O34362	ykoD	61563	139	10	122	3	163	9
O34366	yvzB	17305					184	17
O34375	minJ	43753	320	17	142	6	124	7
O34383	yocR	48359	33	3
O34384	yceE	21106	215	6	221	5	234	6
O34385	mntA	33454					3200	123
O34391	xlyB	34013					31	2
O34392	ytrE	25501	136	6	49	2	56	3
O34399	gltB	55341	361	24	455	28	138	7
O34424	yteJ	19107	381	10	474	8	358	8
O34431	yloB	97516	79	6	108	7
O34434	ydjG	38926	198	12			100	5
O34436	pit	35322	54	2
O34437	yfkH	30449	28	1
O34440	yfmI	45748					33	1
O34442	mgtE	50869	509	20	163	3	79	2
O34443	apt	18920	26	2	120	5
O34445	ylbN	20095	18	1
O34447	yceF	29148	70	3
O34448	yopQ	53527			58	2
O34454	ykaA	24000	651	28	367	12	336	14
O34459	hisZ	43648	29	1
O34470	ylbL	37627	130	5
O34474	yoeA	51272	113	3	45	1	137	3
O34504	yceB	37032	33	1
O34507	prkC	71879	539	18	356	14	641	26
O34508	ykfB	39619	31	1
O34512	yfmM	59402	36	1
O34521	nagP	48777	267	9	241	8	203	7
O34524	yocS	34400	24	3
O34525	sppA	36650	424	12	442	12	348	10
O34526	alaS	97391	152	9	601	20	181	7
O34529	pfkA	34404	496	13	221	4	164	4
O34538	ycdA	39213	1347	56	1146	37	493	20
O34563	glnH	29795	129	7	451	16
O34565	hisH	23345			116	5
O34572	ykoC	28479	411	21	71	3	157	6
O34574	yefB	35309					26	3
O34577	cysC	22702	58	3	44	3
O34578	yjnA	27118	36	1
O34580	pcrA	83617	60	9	168	9	29	6
O34586	ylbC	39664	131	5			19	1
O34592	ydjP	30661	43	1	79	2
O34593	yjqA	13872	69	3	49	1
O34594	cccB	12092	88	1	253	6	478	7
O34600	nrnA	35234	243	7	68	2
O34605	yopM	7900					32	3
O34616	sdpB	37654	24	4	92	3
O34617	rlmN	41885	81	3
O34618	ytnA	50409	188	9	99	6
O34624	yebE	20653	24	1
O34628	yvlB	41284	186	4	105	3	142	5
O34629	yerH	44546	412	16	133	6	282	10
O34633	yjlC	15573	264	7	253	8	1008	28
O34634	yrrK	15200					24	2
O34638	ykoH	50676			66	11	24	1
O34641	ytrB	33855	156	5	44	2	80	4
O34653	des	40911	39	1
O34654	yodI	9245	22	2
O34658	ylbG	10875					45	2
O34659	ybbR	52875	126	5	111	6	88	5
O34660	dhaS	54190	59	5	48	1	36	2
O34666	ctpA	51117	500	28	314	13	313	11
O34667	luxS	17931	63	2	62	2
O34677	glnQ	27208	69	6	52	1
O34683	hisB	21592	44	1
O34688	ybcC	99275	45	1
O34691	naiP	43908	288	9	232	6	74	2
O34693	yloA	65490			18	1
O34697	bceA	28274	36	2			27	1
O34705	ytpA	29604	57	2			56	2
O34707	ytpB	43385	25	1			31	1
O34722	yfmG	56848	88	4	114	3
O34725	yjhA	24020	422	13	205	6	318	11
O34727	hisF	27391					35	1
O34734	cysP	36926	73	4
O34738	ykoE	21267	314	6	202	2	251	6
O34742	opuCD	24535	573	20	266	10	257	11
O34743	ylbA	13485	316	8	301	7	756	19
O34745	yodF	53901	1422	46	978	37	750	28
O34750	yfmL	42277					56	2
O34751	yloV	59574	33	1	99	3	52	1
O34752	lgt	30656	505	19	315	6	319	9
O34753	tagO	39337	28	1			44	1
O34757	desK	42760	19	1
O34758	yrrL	40476	305	11	56	1	185	8
O34764	sat	43085	385	16	223	11	65	2
O34768	ydjE	34463	93	3	112	2	72	2
O34774	yobJ	33842	990	43	927	28	564	23
O34784	yobI	140704	813	41	347	16	210	11
O34788	bdhA	37489	220	12	425	14	218	10
O34789	ydjI	36285	1157	29	268	7	283	9
O34798	pdaC	53862	91	5	24	1
O34799	ytlR	35699	19	1
O34800	spoIISB	6708					44	3
O34805	yvrC	34275	188	10	102	4	73	3
O34806	ytfJ	16336	113	7
O34813	sirC	18050			54	1
O34814	ftsE	25604	398	8	139	4	290	8
O34824	glmM	48574	40	3
O34833	yceH	41646	710	37	96	2	711	28
O34840	chaA	37611	37	1	26	1
O34847	accA	36482	171	10	190	4	154	7
O34860	rsbRB	32424	35	2	257	7	28	1
O34861	yoaC	54475	162	5	32	2
O34863	uvrA	106650	66	6	128	6
O34864	yoaB	45632	397	31	113	6	84	7
O34866	yodJ	30892	222	11	142	4	130	5
O34872	ytiB	21269			55	2
O34876	ftsX	33078	789	27	488	17	552	21
O34878	opuCB	23134	338	10	127	3	130	3
O34889	sdpA	18810	273	14	350	13	408	17
O34894	ezrA	65013	744	34	548	23	497	25
O34897	ykuT	29994	111	5	65	2	30	3
O34910	yobT	25495					55	5
O34911	ykoF	22181	53	3	40	2	18	1
O34916	ykuR	41645	38	2	24	32	28	31
O34922	ytpI	11060	29	1
O34930	rapK	44044	22	1
O34934	ppnK2	30462			93	7	43	2
O34944	ytjP	51306	26	2	102	3
O34946	znuC	26474	45	1	48	2
O34948	ykwC	30806	148	7	462	14	125	3
O34962	ytsJ	43811	36	2	26	1
O34974	moxC	49381					25	3
O34977	ythP	26718			115	2	182	4
O34979	yvrO	25519	158	11	204	7	295	17
O34981	dapH	25002	206	17	294	13	75	3
O34987	pbuG	46275	457	9	314	6	206	5
O34989	yvrG	67756	123	11	34	4	53	3
O34991	ytvI	40633					36	2
O34992	opuCA	43334	1611	61	756	24	1369	46
O34993	yvoF	19330	48	2
O34996	polA	99030	200	16	134	12	25	1
O35004	ydjH	28145	221	6	137	4	119	5
O35005	ytrF	48618	789	31	199	9	425	19
O35006	hisA	26570	133	6	298	7
O35007	yvrP	43523	99	5	77	2	120	3
O35022	azoR1	22963	72	2
O35024	mntC	48427					1322	39
O35033	coaBC	44235	74	4	45	1
O35043	yfkC	32243	48	1
O35044	bceS	38911	95	4			43	3
O54408	relA	85056	186	8	397	13	28	1
P00497	purF	52058	96	3	90	2	29	1
P02394	rplL	12743	208	7	208	6	180	7
P02968	hag	32607	7407	227	20387	446	4341	133
P04831	sspA	7066	46	1
P04948	thrB	33417	40	3	124	4	37	3
P04969	rpsK	13973	1651	48	1000	25	824	22
P04990	thrC	37725	95	3	91	2	146	4
P05043	spo0E	9842					27	1
P05306	sacP	49422	30	1
P05645	leuB	39876	1025	31	877	23	759	20
P05648	dnaA	50828	231	5	88	3
P05649	dnaN	42134	125	6	121	4	45	1
P05651	recF	42278	44	1
P05652	gyrB	71573	76	2	92	4	30	2
P05653	gyrA	92099	29	2	37	1
P05657	rpmA	10366	57	1
P06222	sigE	27692			36	1
P06224	sigA	42922	84	5			44	2
P06534	spo0A	29787	308	13	266	12	19	1
P06628	spo0F	14218	83	3	65	2	167	5
P07343	fumC	50671	101	5	142	3
P08064	sdhC	22916	132	8	141	5	169	9
P08065	sdhA	65395	3861	156	2053	66	2287	100
P08066	sdhB	29026	1789	84	870	34	972	48
P08164	nadE	30376	55	2
P08495	lysC	43895	913	42	422	16	35	5
P08750	dacA	48777	1972	88	841	32	954	40
P08821	hupA	9878	210	8
P08838	ptsI	63153	715	32	859	37	312	15
P08877	ptsH	9184	321	6	115	2	52	1
P09122	dnaX	63180	26	2
P09124	gapA	35924	941	36	1253	42	1076	42
P09339	citB	99614	531	24	1009	32	192	13
P0CI73	glmS	65639	31	1	50	3
P0CI74	gpsB	11585	123	4	133	6	162	8
P0CI77	proH	32182	24	1	58	2
P0CI78	rplX	11135	56	2
P10585	gntR	28261	63	1
P10725	alr1	43523	155	5			40	2
P10727	spoIIAA	13096	36	2
P10728	spoIIAB	16459	73	2	80	3
P11044	thyA2	30746	75	2	83	2
P11065	hpr	23755			20	2
P11998	ribH	16390			162	4
P12012	gntP	46682	116	5	23	1
P12013	gntZ	52292					29	1
P12039	purD	45309	42	3
P12040	purN	21649	116	3	111	3	33	1
P12041	purQ	25053	83	4	120	4	40	1
P12042	purL	80845	1213	50	1838	64	241	12
P12043	purM	37143	43	3
P12045	purK	42635	113	7			37	1
P12046	purC	27557	426	20	409	15	150	5
P12047	purB	49624	467	24	100	3	38	3
P12048	purH	55776	543	21	176	10	39	4
P12049	yexA	9806	70	2	58	1	82	2
P12310	gdh	28072	54	1
P12425	glnA	50531	473	25	1789	72	456	32
P12667	nucA	16363			62	1	831	29
P12669	nin	15044	48	1	42	1	384	9
P12874	rpsQ	10193	84	6			32	1
P12875	rplN	13260	138	6	158	6	138	7
P12877	rplE	20135	1471	55	1355	40	783	30
P12879	rpsH	14868	394	14	474	12	422	13
P13242	pyrG	60080	277	13	374	16	66	5
P13243	fbaA	30552	306	8	225	8	57	3
P13267	polC	163416	28	5	69	4	34	2
P13484	tagE	78369	72	5			88	6
P13485	tagF	88236	406	28	249	22	94	8
P13792	phoP	27638	19	2	28	1
P13799	degS	44987	477	16			86	4
P13800	degU	25907	163	8	182	7	143	8
P14016	cotE	21078	135	4	89	4
P14192	glmU	49865	78	3
P14193	prs	35132	411	19	759	24	252	12
P14577	rplP	16180	341	11	346	9	349	7
P14802	yoxD	25283	87	2	218	9	91	4
P14949	trxA	11500	85	2			58	1
P15378	comC	26760					35	1
P16263	odhB	45975	1043	47	1309	51	553	29
P16336	secY	47213	1367	70	1033	51	640	25
P16524	patA	43736	675	28	50	2	329	16
P16655	divIB	30148	136	4	143	4	86	2
P16971	recA	38036	668	31	392	11	1160	54
P17620	ribBA	44436	51	3
P17622	ribT	14621					31	4
P17731	hisC	40297	337	12	281	9	217	10
P17820	dnaK	66019	656	23	710	21	365	14
P17865	ftsZ	40370	514	23	127	6	232	9
P17889	infB	78630	949	41	1463	47	393	19
P17894	recN	64639	112	5
P17903	rsbV	11988	93	5	45	3	108	3
P17904	rsbW	18039	30	2	149	5
P17906	rsbX	22358	59	3	95	2
P17921	pheS	38936	45	3	36	2	35	3
P17922	pheT	88062	128	4	937	28	81	3
P18157	glpK	55217	136	8	83	3
P18158	glpD	62585	66	4			38	2
P18159	pgcA	64794	52	4	186	7	103	3
P18185	carB	113183	700	28	676	24	171	8
P18186	argF	34927	39	1
P18255	thrS	73640	683	33	619	26	284	12
P18579	murB	32901	78	3	117	4	22	1
P19465	folE	21320	58	5
P19582	hom	47579	1079	37	891	27	546	23
P19669	tal	22957	612	25	313	15	168	8
P19670	murAB	46142	61	2	52	2
P19672	yqxC	31425			58	1
P19946	rplO	15373	120	8
P19994	map	27563	64	1	60	1
P20166	ptsG	75591	5138	193	5687	188	2068	80
P20277	rplQ	13742	135	7	55	2	129	3
P20278	rpmJ	4473					19	1
P20282	rpsM	13779	898	38	431	20	384	21
P20429	rpoA	34835	294	12	191	6	184	6
P20458	infA	8208	47	2			30	1
P20691	aroE	45383	57	1	49	2
P20692	tyrA	41466	23	1
P20964	obg	47659	59	2	49	4
P21341	paiB	24325					28	6
P21458	spoIIIE	87354	280	11
P21464	rpsB	28007	885	40	1249	48	909	40
P21465	rpsC	24308	1039	38	1162	33	848	28
P21466	rpsD	22821	1426	59	605	32	42	3
P21467	rpsE	17612	1582	54	541	16	1239	43
P21468	rpsF	11118	71	2			59	1
P21469	rpsG	17872	159	7	387	10	350	11
P21470	rpsI	14300	127	6
P21471	rpsJ	11658	144	6	272	9	38	3
P21472	rpsL	15263	451	20	327	14	182	6
P21473	rpsO	10567	35	3	33	1
P21475	rpsR	9021	46	2
P21477	rpsT	9593					44	1
P21879	guaB	53129	999	38	868	37	509	22
P21880	pdhD	49873	2435	96	1728	50	1446	48
P21881	pdhA	41522	79	6	138	5	157	11
P21882	pdhB	35452	475	19	608	23	990	33
P21883	pdhC	47567	3140	140	1965	65	1806	74
P22250	gltX	55802	42	1
P22326	tyrS1	47765	143	6	224	8
P23129	odhA	106440	262	10	866	32	144	4
P23445	fliI	47422	92	2
P23446	flgG	27439	1403	39	2432	56	950	27
P23447	fliF	59264	582	26	585	20	195	13
P23448	fliG	38168	41	3			39	2
P23452	fliL	15584	136	4	372	9	375	10
P23453	fliM	37619	212	11	50	2	116	7
P23454	ylxF	22084	72	4	52	3	141	8
P23545	phoR	65309	350	14	395	13	154	11
P23630	lysA	48886	79	3	123	4	44	1
P23715	argC	38164	72	3	181	3	68	2
P23914	levR	106165	62	1
P23966	menB	30108	332	8	407	8	104	2
P24009	ctaB2	34037	50	5
P24010	ctaD	68982	112	5	46	3	49	3
P24011	ctaC	40354	453	24	129	7	218	10
P24012	ctaE	23251	200	5	183	5	77	2
P24013	ctaF	12612	134	5			26	1
P24072	cheY	13358	62	1	78	1	74	2
P24073	fliY	41027	256	8	52	2	44	2
P24136	oppD	39739	525	25			322	15
P24137	oppF	34840	165	10	121	3	54	4
P24138	oppB	34109	339	12	160	5	117	11
P24139	oppC	33656	805	21	653	18	294	11
P24141	oppA	61543	2257	109	1929	70	1197	53
P24327	prsA	32547	4965	186	3366	106	3097	123
P24469	cccA	12872	48	2	212	8	190	7
P24500	flgB	14434			43	1	61	2
P24501	flgC	16248					35	1
P24808	cwlA	30110					31	2
P25052	tenA	27627	223	12	85	1
P25053	tenI	22971	99	4	46	3
P25148	gspA	33672			67	2
P25811	mnmE	51114	129	7			31	1
P25813	rsmG	27165	49	1	81	3
P25953	comGA	40775					588	17
P25955	comGC	10957					215	8
P25971	pyrF	26090	35	2	191	7	60	3
P25972	pyrE	23735	199	7	91	2	152	4
P25993	pyrAA	40436	264	8	174	5	157	8
P25994	pyrAB	118032	1440	70	2149	75	1147	45
P25996	pyrD	33355	18	1
P26380	levE	18204					31	2
P26497	spo0J	32191	84	5	44	2	27	1
P26901	katA	54757					403	21
P26902	dppA	30367	146	6
P26903	dppB	34034	437	13	340	11	188	5
P26904	dppC	35780	118	9	107	3	163	5
P26905	dppD	37057	231	8			139	5
P26906	dppE	61837	1192	63	1318	55	571	28
P26908	rplU	11268	155	5	82	2	40	2
P27206	srfAA	402750	9488	369	7361	273	10424	404
P27620	tagA	29481	72	3	32	1
P27621	tagB	44697					26	1
P27623	tagD	15319	172	9			65	5
P27876	tpiA	27241	71	1
P28264	ftsA	48333	384	16	249	6	212	9
P28265	sbp	13304	49	1
P28366	secA	95698	1151	56	1283	44	809	39
P28368	yvyD	21966	41	2
P28598	groL	57389	663	24	1459	43	458	19
P28599	groS	10169	83	2
P28611	motA	29321	762	33	510	18	414	19
P28612	motB	29464	665	23	801	22	576	18
P28619	rph	26779			56	1
P28628	sipS	21034	302	17	166	10	288	20
P28670	yoxC	11385	40	3	39	3	68	3
P29072	cheA	74994	634	32	1076	33	391	15
P29141	vpr	85556	144	7	466	13	55	1
P29726	purA	48109	204	10	281	10
P29727	guaA	58211	118	6	47	2
P30300	glpP	21652					26	1
P30949	hemL	46591					28	1
P30950	hemB	36414					41	3
P31102	aroB	40962	1168	52	465	15	429	23
P31103	ndk	16948	65	1
P31104	aroF	42893	224	9	338	10	53	1
P31105	cheR	30048	274	9	119	4	79	5
P31112	hepS	29161	47	2	43	2
P31113	ubiE	26730	63	2	36	1
P31114	hepT	39605	20	1
P31847	ypuA	31275	65	3	53	1
P32081	cspB	7361	72	2			123	3
P32393	comEB	21412					45	2
P32397	hemY	51399	44	1			31	1
P32399	yhgE	84042	516	25	353	15	219	8
P32727	nusA	41757	66	2	66	2	49	2
P32731	rbfA	13379	45	1
P33166	tuf	43680	7756	253	7395	226	4959	181
P33690	comQ	34425	20	1
P34956	qoxB	74017	1580	76	859	48	400	31
P34957	qoxA	36316	1008	48	1084	41	705	32
P34958	qoxC	22771	53	2	46	1	37	2
P34959	qoxD	13678	28	1
P35136	serA	57265	2354	89	2897	90	1003	38
P35149	spoIVA	55197	284	16	633	28
P35160	resA	20166	29	4	116	4	153	4
P35162	resC	43720	258	7	71	6	42	2
P35163	resD	27555	150	5	118	4	61	1
P35164	resE	66730	136	9	102	5	41	2
P35165	sigX	23266	44	3
P35166	rsiX	41326	69	3
P35528	fliP	24896	162	6	25	1
P35536	fliZ	24912	114	4	23	1	89	2
P35620	flhA	74045	358	19	127	4	179	5
P36430	leuS	91599	50	2	48	2
P36838	carA	39287	68	6	30	1
P36843	argJ	43706	87	3	460	14
P36947	rbsA	54612					26	6
P36949	rbsB	32264	46	2
P37105	ffh	49509	471	21	157	8	92	7
P37251	ilvB	62720	628	32	663	33	390	21
P37252	ilvH	18913	188	8	573	19	264	13
P37253	ilvC	37548	2572	96	420	12	301	9
P37437	rplI	16342	24	1
P37455	ssbA	18788	105	6			29	2
P37464	serS	48982	79	6			54	5
P37465	metG	76197	62	2	41	12
P37467	xpaC	23944	66	2
P37468	rsmA	32758	25	2	45	2
P37471	divIC	14712					35	2
P37472	hprT	20227	46	2	27	1
P37474	mfd	133786	147	12	345	14
P37476	ftsH	71064	4312	191	2575	92	2539	104
P37477	lysS	57503	263	17	358	25	40	9
P37484	yybT	74450	325	11	127	3	56	1
P37485	yybS	34625	20	1
P37487	ppaC	34139	225	7	300	9	95	3
P37494	yybJ	24314	433	13	156	4	291	10
P37513	yyaK	34042	177	8	69	2	46	2
P37518	ychF	40272	150	4	199	7	560	15
P37523	yyaB	16884					37	1
P37524	noc	32774			50	1
P37527	pdxS	31705	596	17	1011	27	180	6
P37528	pdxT	21604	154	3	233	8
P37529	dck	25485	104	3			89	2
P37535	yaaN	43803	270	7
P37538	yaaQ	11959	74	2	233	4	371	9
P37541	yaaT	31655	195	8	172	5	32	1
P37546	yabE	47852					29	1
P37550	ispE	31927	48	2	74	1
P37552	yabJ	13702			37	1
P37556	yabN	56242			41	3
P37562	yabT	37756	25	1
P37566	yacD	34189	406	16	86	3	226	9
P37570	yacI	41383	80	3	39	1	75	2
P37571	clpC	90120	842	39	1242	37	695	27
P37572	radA	49794	100	2	26	1
P37580	fhuD	34462	1075	32	492	14	274	10
P37585	murG	40025	143	11			68	8
P37599	cheV	34612	179	7	149	5	107	2
P37807	rpmB	6862	40	3
P37808	atpA	54679	1468	61	933	36	1001	41
P37809	atpD	51388	1409	44	820	24	902	31
P37810	atpG	31635	446	18	359	12	348	11
P37811	atpH	19970	153	9	153	6	137	11
P37812	atpC	14200	38	1	42	2	25	1
P37813	atpB	27036	943	29	510	14	373	12
P37814	atpF	19196	1030	41	2049	67	1827	74
P37815	atpE	7089	23	1
P37869	eno	46610	423	18	723	21	160	7
P37870	rpoB	133831	878	43	2848	107	289	17
P37871	rpoC	134795	897	48	3361	137	415	21
P37874	ygxB	59988	514	23	34	3	96	6
P37875	spoVR	55820	140	7	45	2
P37876	ytxK	37384	40	3
P37877	ackA	43167	229	10	230	9	113	4
P37887	cysK	32799	334	11	61	5	159	5
P37941	bfmBAB	36004			73	1	71	3
P37942	bfmBB	45979			23	1
P37944	aroK	22137	175	9	32	3	26	2
P37945	lon1	86667	530	22	433	21	23	2
P37946	ilvA	47128	117	8	205	7	168	6
P37949	lepA	68829	573	15	181	7	163	6
P37954	uvrB	76451	34	4	34	1
P37958	mecA	25805			86	1	41	1
P37959	yusZ	30770	61	2
P37960	mrgA	17322					43	1
P37963	spoVID	65222			214	8
P38022	rocR	52202	36	1
P38032	nadB	58602	130	10
P38049	hmoB	18816	24	1
P38050	pbpF	79216					28	4
P38422	dacF	43327					59	3
P38424	engB	22013	50	1
P38490	ypeB	51210			68	2
P38494	ypfD	42376	281	16	156	6	32	3
P39070	clpQ	19523	84	1	32	1
P39071	dhbA	27608	31	1	136	4
P39072	gerM	39662	125	3	118	5
P39119	citA	41040					35	2
P39120	citZ	41760	765	35	1035	39	403	28
P39121	deoC	23474			37	2
P39124	glgD	39605	19	1
P39126	icd	46503	2169	95	2715	116	1201	56
P39134	prkA	73013	400	21	1360	50
P39137	rocE	51942	123	2			43	1
P39138	rocF	32191	80	1
P39141	nupC	42525	87	7	26	2
P39142	pdp	46178	71	4	28	4
P39145	comFA	53103					62	2
P39148	glyA	45575	707	24	351	10	90	4
P39149	upp	23079	61	3	27	2
P39155	ywlE	16889	37	3	32	2	36	3
P39209	tlpC	61803	234	7			115	3
P39214	mcpA	72269	1560	60	1354	43	784	33
P39215	mcpB	71857	1957	76	1778	56	1044	33
P39216	tlpA	72233	425	19	538	18	328	11
P39217	tlpB	71549	741	30	614	19	346	12
P39456	tcyC	27788	237	10	104	2	58	2
P39576	ilvK	40324	512	19	334	12	364	15
P39578	dltD	44780	338	15	104	1	113	4
P39580	dltB	46933	83	5			38	1
P39581	dltA	56115	28	1
P39582	menA	33987	51	1	74	2	178	3
P39595	efeU	52411	252	11			37	2
P39596	efeM	42941	515	24	89	4	148	6
P39604	rodA	43417	72	3			41	2
P39606	ywcH	36592					28	1
P39610	pdxK	29113	26	1	174	5
P39616	ywdH	50818	28	2
P39618	ywdJ	47458					18	1
P39620	gerQ	20263			21	1
P39633	rocG	46752			39	2
P39642	bacE	43616	62	1
P39644	ywfH	28175	147	7	110	3
P39666	nadC	31829	128	9	131	8	27	1
P39694	comEA	21756					807	31
P39696	comER	30562	159	3	375	8
P39737	yvyC	13017			29	1
P39751	mbl	36009	1073	44	235	8	552	19
P39753	flhP	29485	45	3
P39760	ktrC	24390	179	8	83	4	44	1
P39765	pyrR	20308	103	4	173	4	105	2
P39766	pyrP	45537	233	13	149	7	115	7
P39771	purT	42295			24	1
P39772	asnS	49167	333	16	382	14	126	6
P39773	gpmI	56388	169	8	337	9	106	5
P39778	clpY	52553	25	2	152	5
P39779	codY	28995	173	7	318	13	71	2
P39793	ponA	99502	961	45	1956	61	2054	91
P39794	treP	50025					25	1
P39802	cheW	17551	228	7	270	7	234	8
P39803	yitT	30516	30	3	36	2	48	2
P39804	ipi	14065	94	3	26	1	88	4
P39810	flgK	54322	90	5	154	8	27	1
P39812	gltA	169237	4401	160	6425	213	1299	65
P39813	smf	33086					129	7
P39814	topA	79769			142	8
P39816	gamP	68329	439	24	223	9	44	2
P39820	proB	39321	33	2
P39821	proA	45452	153	7	76	3	103	4
P39823	pssA	19942					44	1
P39840	galM	37262					25	1
P39845	ppsA	289916	64	6	22	2
P39846	ppsB	291122					36	1
P39847	ppsC	288178	64	6
P39848	lytD	95495					46	2
P39911	yphF	27901	112	7	86	4	42	4
P39912	aroA	39629	1062	45	862	29	1025	35
P40396	comK	22643					80	3
P40397	yhxC	30940	75	1
P40405	swrB	19108	74	3			51	1
P40409	feuA	35143	345	16	111	5	86	1
P40735	ecfA	31439	37	1
P40742	ylxH	33197	59	1
P40750	pbpD	70842	306	15	403	12	145	4
P40758	glnK	46942					27	15
P40761	yuxK	15889	124	5	85	2	200	6
P40768	ytkA	15904	105	3	94	4	64	2
P40778	murC	48619	56	4	118	6
P40779	ytxG	15432	333	7	399	9	1049	30
P40780	ytxH	16544	465	13	963	25	1105	34
P40806	pksJ	565483	98	13	53	9	51	5
P40871	dhbE	60233	71	3	54	1
P40872	pksM	478457	60	8			30	3
P40924	pgk	42221	193	11	43	1	200	10
P40948	corA	37741					32	1
P42060	rplV	12452	590	24	104	2	142	6
P42061	appA	61935	37	2
P42062	appB	35255	879	27	530	17	369	9
P42063	appC	33512	641	36	494	23	359	22
P42064	appD	36744	362	10	143	5	235	6
P42065	appF	37348	723	32	259	14	463	19
P42084	hutI	45649					39	1
P42085	xpt	21025	200	8	319	11
P42086	pbuX	46379	497	19	456	13	224	6
P42108	yxaI	16992	575	21			586	20
P42113	asnH	86562	128	6	73	4
P42176	narH	56405					27	1
P42182	era	34053	160	5	269	7	21	1
P42199	tcyA	29553	1157	38	578	22	415	16
P42200	tcyB	26429	48	4
P42234	katE	77546	41	4
P42244	ycbL	25867	34	1	86	6
P42245	ycbM	35372	39	1
P42248	ycbP	14101			30	2	43	3
P42297	yxiE	15989					41	1
P42298	yxiF	18554	39	1	29	1
P42312	nupG	43861	155	6	59	1
P42318	yxjG	43366	291	13			71	3
P42319	yxjH	42876	106	3
P42400	yckB	31757	94	5	141	4	256	10
P42409	rsbRA	31087	72	2	210	6
P42422	yxdK	38136	60	2
P42425	lon2	60505			26	1
P42919	rplB	30312	2181	102	2462	91	22	1
P42920	rplC	22669	136	6	133	4
P42921	rplD	22377	666	28	431	22	252	13
P42923	rplJ	18068	710	31	861	28	178	10
P42924	rplW	10949	180	10	49	3	55	3
P42953	tagG	32220	251	9	127	5	73	5
P42954	tagH	59377	151	7	80	4	86	5
P42955	yslB	17333					66	3
P42956	mtlA	50210	90	3			58	2
P42959	sipU	21169	136	9
P42962	ycsE	28225	26	1
P42964	ycsG	42164	67	2	115	3
P42971	pbpC	74531	487	32	680	27	391	21
P42974	ahpF	55125	119	6			266	8
P42978	ypjC	32054	50	2	46	1	37	1
P42980	mgsA	15176			50	1
P45694	tkt	72356	179	9	391	12	25	1
P45708	yneF	8293	340	14	459	16	579	28
P45709	ccdB	13584					26	1
P45710	ccdC	18114	33	1
P45711	yneK	16978	59	5	62	2	89	3
P45740	thiC	66346	165	7	206	9	73	5
P45745	dhbF	264516	897	48	300	18
P45859	prpD	53244	26	4			33	4
P45861	ywjA	64635	595	26	161	9	75	6
P45866	fadF	79877	39	4
P45913	yqaP	34759	53	1	109	4	176	6
P45914	yqaR	18101	202	9	109	4	276	10
P45916	yqaT	51132			25	1
P45917	yqbA	58536	31	4	31	3	27	6
P45919	yqbC	25236	135	6	56	1	113	6
P45930	yqbN	17182	20	1
P45950	yqbQ	37026					34	1
P46208	htpG	72440	322	14	259	10	169	10
P46322	pgsA	21325	273	10	141	4	180	7
P46323	cinA	45738	24	2	32	2
P46324	yvrN	44315	30	4			39	1
P46326	yxbB	28375	34	1
P46333	csbC	50335	161	6	152	5
P46338	pstS	31721			26	1
P46343	phoH	35519	55	3			45	2
P46344	yqfF	79345	1088	46	974	38	685	28
P46348	yeaB	31822	85	2	71	2
P46349	gabP	51166	373	21	68	8	213	12
P46898	rplF	19497	324	10	99	3
P46899	rplR	12961	186	7	71	2	35	2
P46906	argS	62798	22	7
P46911	qcrA	18952	271	9	425	11	490	15
P46912	qcrB	25528	264	13	198	7	202	10
P46913	qcrC	28258	206	8	184	5	101	6
P46915	cotSA	43056			36	3
P46917	ggaA	53457	60	3
P46918	ggaB	107315	351	15	124	7	108	9
P46919	gpsA	37527	152	7	62	3	28	2
P46920	opuAA	46439	912	41	341	16	658	33
P46921	opuAB	30228	375	30	331	16	271	19
P46922	opuAC	32251	1468	59	1475	40	951	36
P49778	efp	20455	77	2
P49784	spoIIIAG	25533					31	2
P49785	spoIIIAH	23791	351	10	98	2
P49786	accB	17275	19	1
P49787	accC1	49706	402	20	237	10	154	7
P49814	mdh	33623	651	20	267	9	122	3
P49849	mutS	98055	28	5
P49937	fhuG	36188	85	2
P49938	fhuC	30050	30	2
P50620	nrdE	80979	131	8	141	11
P50735	gudB	47538	787	34	154	4	240	8
P50743	der	48796	66	3	72	2
P50829	ypqE	17981	47	1	44	2	60	1
P50831	ypvA	74709	45	1	47	1
P50842	kduD	27169			40	1
P50849	pnp	77586	1696	72	483	17	129	5
P50863	salA	38671	160	3	41	1	25	2
P50865	pdaB	28306	37	1	23	2
P50866	clpX	46721	1343	44	996	29	496	21
P51777	cspD	7305	46	2	88	3	49	2
P51785	ilvD	59862	41	4	44	2	28	1
P51831	fabG	26323	448	18	398	14	350	12
P51834	smc	135658			48	4
P51835	ftsY	36377	258	9			87	4
P52035	bsaA	18415	27	1			26	1
P52996	panB	29853	122	4	195	5	31	1
P52998	panC	31995	21	1
P53001	aspB	43289	140	10	165	5	112	5
P53554	bioI	45122	279	9
P53555	bioK	50421	41	2
P53556	bioF	42726	35	1
P53557	bioB	37417	266	16	81	3	57	9
P53558	bioD	25258	286	12	231	7
P54159	ypbR	137926	273	14	190	6	36	5
P54161	ypcP	33208	82	3
P54167	metA	35462	33	1
P54169	ypgR	42599	26	1	28	3
P54178	ypmQ	21932	62	4	96	3	59	1
P54179	ypmS	21075	391	9	228	4	186	5
P54325	xkdE	56489	31	4	31	3	27	6
P54333	xkdN	17087					32	1
P54336	xkdQ	36893					34	1
P54342	xkdW	12720					26	2
P54374	aroD	30760			58	1
P54375	sodA	22476	178	7			59	1
P54381	glyS	76243			114	8
P54382	folD	30837	162	9	270	11
P54383	ispA	32711			48	1
P54391	ypiF	17256			20	1
P54392	ypjA	21316			23	1
P54396	ypmB	17885	225	8	98	3	93	4
P54417	opuD	56314			42	1	66	3
P54419	metK	44301	211	11	475	17	82	3
P54420	asnB	72791	208	9	147	8	98	5
P54423	wprA	96485	80	6	227	6	948	34
P54425	ybxG	50191	149	8			41	3
P54428	yrkA	49011	74	6
P54447	yqeB	27237	63	4	93	2	92	3
P54449	yqeD	22979	68	1
P54451	yqeF	27736	29	1	63	1
P54452	yqeG	20132	90	4	80	3	51	2
P54453	yqeH	41315	25	1
P54456	yqeK	21326			23	1
P54460	prmA	34567	18	1	84	2
P54465	yqeZ	46433	252	7	48	1	67	2
P54466	yqfA	35676	6401	173	3270	86	4285	118
P54467	yqfB	15761	113	3	66	2	74	4
P54470	yqfL	30501	171	10	117	4
P54475	cshB	50053	47	1	55	2
P54478	yqfU	32497	48	3	22	1	33	1
P54481	yqfX	13893			78	1
P54482	ispG	40843	173	7	64	2	37	2
P54485	yqgB	28494	105	3	51	1	35	1
P54486	yqgC	17341	49	2
P54488	yqgF	80093	38	3	40	2
P54493	gluP	56540	65	4			21	1
P54495	glcK	33925			28	1
P54498	yqgU	40344	57	1
P54506	sipW	20665			44	1
P54507	tasA	28287	156	5
P54510	yqhL	14670	302	19	165	10	419	25
P54511	lipM	32277	44	2	92	2
P54514	yqhP	14558			49	2	92	3
P54515	yqhQ	36033	39	1	29	1
P54518	yqhT	38153					59	32
P54519	yqhY	14682	432	14	396	11	398	12
P54523	dxs	69629	56	3	92	2
P54531	yqiT	40195	130	12			36	3
P54532	buk	39853	32	2
P54534	yqiW	16357	27	1	73	2	30	1
P54535	artP	28409	4332	144	2324	75	2361	83
P54536	artQ	23939	897	23	632	12	916	23
P54537	artM	26989	631	37	218	10	232	15
P54538	yqjA	37179	81	5
P54547	zwf	55768	88	5
P54551	yqjN	62157	22	1
P54552	proI	30491	55	3	53	2
P54554	yqjQ	28492	128	5	73	2	52	2
P54558	yqjU	5947					29	1
P54560	dinB2	46200			22	2
P54564	yqkA	39185	31	1
P54571	mleN	50293	97	4	146	4	47	3
P54576	mcpC	71986	3347	132	2418	85	1466	62
P54592	yhcH	34619	302	16	1830	55	201	14
P54593	yhcI	34858	97	6	718	40	49	3
P54596	tcyP	49008	198	8	60	3
P54598	yhcN	21061	300	10	207	6	48	1
P54601	yhcQ	24946	88	2	36	1
P54608	yhcX	60636	66	1	22	1
P54616	fabI	28027	1044	44	1197	37	566	19
P54617	ydjF	25182	841	23	1157	25	545	14
P54720	catD	14410	100	2
P54941	yxeB	35541	860	37	402	14	187	6
P54944	yxeE	14705	107	4
P54951	yxeL	19170	53	1
P54952	yxeM	29349	1190	34	1179	28	656	15
P54953	yxeN	25047	186	4	76	1	76	2
P54954	yxeO	27782	103	3	66	2	85	3
P54983	amhX	41907	148	6	303	10	58	2
P55189	ybaR	51255	29	2			53	2
P55339	ecsA	27818	438	20	158	4	312	14
P55340	ecsB	47269	366	12	98	4	57	3
P55342	yllA	62743			55	1
P55343	mraZ	16728	25	2
P55872	infC	19834	133	6	51	2
P55873	rplT	13630	525	20	347	13	260	10
P55874	rpmI	7552	193	4	39	1
P55908	ycgA	50861	123	10	90	4	79	3
P55910	lctP	57795			94	2
P56849	rpmGA	6068	39	1
P68579	sunT	82083	51	3
P68729	argB	27821	141	7	103	2
P70947	yitU	30728			41	1	26	1
P70965	murAA	46785	131	7	67	1
P70970	ecfAB	30559	228	8	82	2	42	1
P70972	ecfT	29822	49	3
P70974	rplM	16365	189	9	169	8	158	5
P70995	ywhC	24687	23	1	31	1	32	2
P71002	rapF	45694	266	13	52	1	50	3
P71009	albC	27387	166	4	70	3	67	5
P71012	fruA	67255	603	33	570	22	85	8
P71013	sipT	21841	401	24	142	11	329	23
P71018	plsX	35798	457	21	97	4	405	17
P71021	divIVA	19329	1146	34	540	14	1422	44
P71038	ywnC	13790			57	3	41	1
P71040	clsA	55888	95	3			70	3
P71042	ywnG	18452					39	1
P71043	ywnH	18409	54	1	112	3	54	1
P71044	spoIIQ	31094	77	3	174	3
P71051	yveL	24659			38	4
P71054	epsE	32412	54	1
P71058	epsI	41710	78	2
P71062	epsL	23235	31	1
P71065	epsO	37308					28	1
P71067	lutP	59894	746	31	242	6	324	11
P71070	yukC	52129	157	7	202	6	76	4
P71079	fabL	27275	73	4	496	13	65	4
P71082	ygaD	65783	78	6			40	4
P71083	ygaE	40766	32	1
P71088	spo0M	29772	492	15	558	18	257	8
P80239	ahpC	20785	267	8	72	1	233	9
P80240	greA	17261	32	1
P80244	clpP	21725	396	14	429	11	369	15
P80643	acpA	8586			40	1
P80698	tig	47458	71	8
P80700	tsf	32448	437	18	554	33	128	13
P80858	leuC	52815	160	6	286	14	47	2
P80859	gndA	51914	240	12	30	2	29	1
P80860	pgi	50568	101	7	61	2
P80861	yjlD	41927	1606	57	639	27	484	25
P80862	serC	40281	46	2
P80864	tpx	18318	86	3	115	3	77	3
P80865	sucD	31647	84	5	114	4	23	1
P80866	yurY	29070	819	29	1443	40	888	28
P80868	fusA	76740	2823	100	5544	173	1977	68
P80870	yugI	14274	58	1	49	1
P80871	ywrO	19999	24	1
P80875	yceD	20738	443	9	287	8	171	5
P80877	metE	86981	1512	64	2702	90	204	10
P80878	ydbD	30238			45	2
P80879	dps	16583			206	6
P80880	trxB	34612	20	1
P80885	pyk	62249	127	8	197	13
P80886	sucC	41574	628	31	1047	36	350	14
P81100	yceC	21981	201	7	193	8	170	6
P81102	yodC	22383	165	4
P94352	yxjI	18928			40	1
P94356	yxkC	19392	6042	233	4473	140	3417	126
P94357	yxkD	30770	139	6
P94360	msmX	41397	310	13			240	8
P94362	yxkI	63742	91	5
P94392	ycgO	51168	164	7	126	5	31	2
P94408	yclF	53272	26	1
P94414	yclK	55067	80	3			28	1
P94415	rapC	45777	174	11	27	1
P94417	yclM	49908	81	5	58	2
P94418	yclN	34991	47	4	36	1
P94419	yclO	35507	55	1
P94420	yclP	28571	174	6	84	3	90	3
P94421	yclQ	34827	2214	70	677	18	450	14
P94422	ycnB	50822	52	3			51	2
P94431	ycnI	22156	49	2
P94446	coxA	22161	178	5	85	1
P94459	ppsD	407869	88	6	22	2
P94461	priA	91980			28	3
P94474	yeaC	35835	106	4			28	1
P94475	yeaD	45465	34	3
P94476	yebA	85462	110	6
P94498	cysH	27357	34	2	166	3
P94504	yvrH	26834			45	2
P94507	uppP	30439	948	31	324	13	618	24
P94512	ysaA	29676	110	3	274	6	68	2
P94517	yscB	25359	274	9			192	7
P94520	ysdB	15676	230	13	91	5	178	13
P94535	glcD	51247					66	5
P94541	rnhC	34162					26	2
P94544	polX	64194			64	1
P94545	mutSB	87420	94	3
P94546	yshE	15060	266	6			265	6
P94548	fadR	21965	43	1
P94552	abf2	56838					26	2
P94559	ysnB	19020	27	1
P94565	leuA	57218	2723	83	966	30	1089	36
P94568	leuD	23121	48	3	36	2
P94571	bcrC	21709			34	1	24	1
P94584	fabZ	15844	42	1
P94585	mscL	14271	89	3	81	2	56	1
P94588	ywpF	15595	32	1
P94592	ywpJ	31935	38	2			26	1
P96499	yvhJ	43185	414	12	139	3	150	5
P96501	flgL	32739	60	2	276	6	26	1
P96579	ydaF	21240					35	1
P96591	ydaP	63554	40	1	41	1
P96593	mntH	45656					378	18
P96596	ydbA	31283	43	1
P96600	dctB	39894	44	2			41	3
P96604	ydbI	40104	186	4	105	2	62	1
P96605	ydbJ	34312	447	23	103	6	120	7
P96612	ddl	39334	91	4	115	4	27	2
P96614	cshA	55296	788	26	720	25	427	15
P96615	ydbS	18168	75	4	72	4	84	6
P96616	ydbT	57020	130	12	100	4	42	4
P96619	ydcC	38170	338	14	655	14
P96647	yddJ	14726	78	1	69	3	123	3
P96650	yddM	36179	204	13	118	3	56	3
P96652	lrpA	15599	39	2			33	1
P96667	ydeJ	24511	139	6	146	3	93	6
P96672	ydeO	31465	665	33	358	15	523	17
P96694	mhqP	13267	54	3	24	1
P96703	ydgE	18419					24	1
P96704	ydgF	51041	147	11	44	1	70	3
P96706	ydgH	95543	328	13	111	4	234	12
P96709	ydgK	42824	25	1
P96712	bmr3	55766	71	3
P96715	ywqC	26624	94	3	126	3
P96718	ywqF	47982			21	2
P96740	pgdS	45333	110	5
P97029	ygaO	17875			29	1	44	1
Q00777	proG	30298	100	4
Q01463	minC	25096	60	3	80	3	33	1
Q01464	minD	29559	253	12	97	6	284	8
Q01465	mreB	36008	1245	41	363	9	798	28
Q01466	mreC	32178	272	13	141	4	149	9
Q01620	jag	23148	92	2	73	1
Q01625	misCA	29616	789	22	789	19	648	19
Q01960	flhF	41295	79	4			47	1
Q02112	lytA	11279	297	12	196	8	280	12
Q02114	lytC	52651			83	5
Q02115	lytR	34565	1323	49	844	27	615	30
Q02169	maf	21396			39	2
Q02886	dinB	19891			59	2	68	2
Q03222	rho	48598	170	6
Q03224	glpX	34044	233	8	117	2	87	4
Q03523	murE	54577			27	1
Q04747	srfAB	401377	14243	543	11163	436	13353	542
Q04795	dapG	43092	107	9	67	5	74	7
Q04796	dapA	31022	68	3
Q04797	asd	37937	36	2			33	1
Q05470	pksL	509001	58	7
Q05522	cheB	38982	31	1
Q05852	gtaB	33106	47	4	256	12	72	3
Q05865	folC	48306	50	3
Q05873	valS	101852	52	2	158	9
Q06750	cysE	24185	252	11	210	8	97	5
Q06752	cysS	54045			21	1
Q06754	yacL	40946	280	11	167	3	155	3
Q06795	nusG	20113	23	1
Q06796	rplK	14979	173	3	146	6	191	5
Q06797	rplA	24973	1114	33	1263	33	244	11
Q07428	nrgB	12871	24	1	27	2	76	2
Q07833	wapA	258005	99	6			33	2
Q07836	wapI	16533	220	9	315	9	425	12
Q07868	pbpB	79328	517	31	336	18	83	8
Q08311	cotY	18728	123	6	109	3	46	3
Q08313	cotX	18989	51	1
Q08352	ald	39716	127	5
Q08430	kinB	48124	399	16	148	4	68	2
Q08787	srfAC	144237	1360	65	2851	107	1354	62
Q08788	srfAD	27774	144	5	253	10	86	7
Q08791	ycxA	45142	85	5
Q45064	plsY	20953	59	3	72	1	91	4
Q45068	alsT	50325	258	20	89	5	61	5
Q45460	opuBA	43219	281	19			204	12
Q45461	opuBB	23148	59	5	27	1	24	1
Q45462	opuBC	34493	108	2	97	3
Q45477	ileS	105178	33	2	36	2
Q45479	lspA	17472	25	1	53	1	22	1
Q45493	rnjA	61763	157	10	652	23	161	7
Q45498	yktB	24658	33	1	41	1
Q45499	suhB	29798	208	7	226	6
Q45514	sapB	26090	106	9	50	3	20	1
Q45538	cotJC	21739			108	2
Q45539	csbB	37876	93	3	62	1
Q45577	ybeC	59173	148	9			25	2
Q45585	sigW	21757	214	7	55	2	185	7
Q45588	rsiW	23497	65	3			33	2
Q45589	ybbP	30584	152	10	94	5	83	3
Q45592	yydJ	27601	121	2	111	2	52	1
Q45593	yydI	23868	425	17	256	8	332	11
Q45595	yydG	37701	28	1
Q45598	yydD	69406	134	6	171	7	56	3
Q45599	yydC	15480					20	1
Q45600	yydB	56767	324	15	120	13	73	11
Q45601	rlmH	18062	78	3			38	1
Q45606	yycP	44192			28	1
Q45612	yycI	32631	98	3	124	4	34	1
Q45614	yycG	69990	387	13	316	7	192	5
Q59192	parE	72962	22	2
Q794W0	yycH	52183	366	15	74	2	79	4
Q795M6	yugH	42568	49	3			76	1
Q795Q5	yttA	28091					29	2
Q796K8	pbpH	79299	79	3	37	1
Q796P5	yitY	54830	64	3
Q796Y5	ygaK	51039			21	3	25	2
Q796Z1	ygaC	21297	73	3
Q797A7	yfnA	49159	106	8	26	1	48	3
Q797B3	ltaS1	73269	38	1
Q797S1	ybbF	47741	58	3			23	1
Q7WY60	mrpE	18482	38	3			51	1
Q7WY78	ywtF	35899	145	5
Q99027	comP	89537	736	29	214	7	184	8
Q9JMQ2	ppaX	24045	51	3
Q9K2S2	mrpA	89586	68	4
Q9KWU4	pyc	128141	1245	46	3761	125	845	36
Q9KWZ1	nadA	41808	290	13	193	4	66	4

## Sheet: S2b
Table S2: Proteins identified in the Bacillus subtilis vegetative cell membrane fraction
b. Mascot search result details of Replicate 1
Protein hit number	Protein accession	Protein description	Protein score	Protein mass	Peptide score	Peptide sequence	Peptide variable modification
373	1::sw|C0H3X7|MPRF_BACSU	Phosphatidylglycerol lysyltransferase OS=Bacillus subtilis (strain 168) GN=mprF PE=1 SV=1	211	96317	21.49	LAAFLNEK
373	1::sw|C0H3X7|MPRF_BACSU	Phosphatidylglycerol lysyltransferase OS=Bacillus subtilis (strain 168) GN=mprF PE=1 SV=1	211	96317	20.28	YMYSFSGLR
373	1::sw|C0H3X7|MPRF_BACSU	Phosphatidylglycerol lysyltransferase OS=Bacillus subtilis (strain 168) GN=mprF PE=1 SV=1	211	96317	26.57	LVVLGDPSGQR
373	1::sw|C0H3X7|MPRF_BACSU	Phosphatidylglycerol lysyltransferase OS=Bacillus subtilis (strain 168) GN=mprF PE=1 SV=1	211	96317	28.7	LVVLGDPSGQR
373	1::sw|C0H3X7|MPRF_BACSU	Phosphatidylglycerol lysyltransferase OS=Bacillus subtilis (strain 168) GN=mprF PE=1 SV=1	211	96317	44.39	LVVLGDPSGQR
373	1::sw|C0H3X7|MPRF_BACSU	Phosphatidylglycerol lysyltransferase OS=Bacillus subtilis (strain 168) GN=mprF PE=1 SV=1	211	96317	39.24	LVVLGDPSGQR
373	1::sw|C0H3X7|MPRF_BACSU	Phosphatidylglycerol lysyltransferase OS=Bacillus subtilis (strain 168) GN=mprF PE=1 SV=1	211	96317	49.43	LVVLGDPSGQR
373	1::sw|C0H3X7|MPRF_BACSU	Phosphatidylglycerol lysyltransferase OS=Bacillus subtilis (strain 168) GN=mprF PE=1 SV=1	211	96317	55.83	FAAVIFNNVR
373	1::sw|C0H3X7|MPRF_BACSU	Phosphatidylglycerol lysyltransferase OS=Bacillus subtilis (strain 168) GN=mprF PE=1 SV=1	211	96317	30.83	QISDEWLGSK
373	1::sw|C0H3X7|MPRF_BACSU	Phosphatidylglycerol lysyltransferase OS=Bacillus subtilis (strain 168) GN=mprF PE=1 SV=1	211	96317	19.93	QISDEWLGSK
373	1::sw|C0H3X7|MPRF_BACSU	Phosphatidylglycerol lysyltransferase OS=Bacillus subtilis (strain 168) GN=mprF PE=1 SV=1	211	96317	50.26	SLSVTMFLVTR
373	1::sw|C0H3X7|MPRF_BACSU	Phosphatidylglycerol lysyltransferase OS=Bacillus subtilis (strain 168) GN=mprF PE=1 SV=1	211	96317	30.78	GFSLGFFDPSYLQK
908	1::sw|C0H423|YOZV_BACSU	Uncharacterized membrane protein YozV OS=Bacillus subtilis (strain 168) GN=yozV PE=4 SV=1	44	9155	43.53	YNFYYFQQQSK
732	1::sw|C0SP78|YDFM_BACSU	Uncharacterized transporter YdfM OS=Bacillus subtilis (strain 168) GN=ydfM PE=3 SV=1	72	32891	34.5	LSLDHDLTIK
732	1::sw|C0SP78|YDFM_BACSU	Uncharacterized transporter YdfM OS=Bacillus subtilis (strain 168) GN=ydfM PE=3 SV=1	72	32891	56.57	SVDPELIEEYK
732	1::sw|C0SP78|YDFM_BACSU	Uncharacterized transporter YdfM OS=Bacillus subtilis (strain 168) GN=ydfM PE=3 SV=1	72	32891	20.12	ISMELIRPSVDVLMEK
1043	1::sw|C0SP86|SFTA_BACSU	DNA translocase SftA OS=Bacillus subtilis (strain 168) GN=sftA PE=1 SV=1	27	106928	27.08	NTIGIEVPNR
681	1::sw|C0SP89|YOAH_BACSU	Putative methyl-accepting chemotaxis protein YoaH OS=Bacillus subtilis (strain 168) GN=yoaH PE=2 SV=1	81	60966	22.38	VNDLIDEEK
681	1::sw|C0SP89|YOAH_BACSU	Putative methyl-accepting chemotaxis protein YoaH OS=Bacillus subtilis (strain 168) GN=yoaH PE=2 SV=1	81	60966	81.61	GFAVVAEEVR
402	1::sw|C0SP93|ACCD_BACSU	Acetyl-coenzyme A carboxylase carboxyl transferase subunit beta OS=Bacillus subtilis (strain 168) GN=accD PE=1 SV=1	189	32242	20.64	ITLAIEKAK
402	1::sw|C0SP93|ACCD_BACSU	Acetyl-coenzyme A carboxylase carboxyl transferase subunit beta OS=Bacillus subtilis (strain 168) GN=accD PE=1 SV=1	189	32242	23.46	YASVPSDQAK
402	1::sw|C0SP93|ACCD_BACSU	Acetyl-coenzyme A carboxylase carboxyl transferase subunit beta OS=Bacillus subtilis (strain 168) GN=accD PE=1 SV=1	189	32242	56.81	MGSMGSVVGEK
402	1::sw|C0SP93|ACCD_BACSU	Acetyl-coenzyme A carboxylase carboxyl transferase subunit beta OS=Bacillus subtilis (strain 168) GN=accD PE=1 SV=1	189	32242	45.53	HDVPEGIMTK
402	1::sw|C0SP93|ACCD_BACSU	Acetyl-coenzyme A carboxylase carboxyl transferase subunit beta OS=Bacillus subtilis (strain 168) GN=accD PE=1 SV=1	189	32242	30.93	HGQLDAVIHR
402	1::sw|C0SP93|ACCD_BACSU	Acetyl-coenzyme A carboxylase carboxyl transferase subunit beta OS=Bacillus subtilis (strain 168) GN=accD PE=1 SV=1	189	32242	50.26	VPFIIFTASGGAR
402	1::sw|C0SP93|ACCD_BACSU	Acetyl-coenzyme A carboxylase carboxyl transferase subunit beta OS=Bacillus subtilis (strain 168) GN=accD PE=1 SV=1	189	32242	56.55	MQEGVLSLMQMAK
402	1::sw|C0SP93|ACCD_BACSU	Acetyl-coenzyme A carboxylase carboxyl transferase subunit beta OS=Bacillus subtilis (strain 168) GN=accD PE=1 SV=1	189	32242	36.13	LPEDFQTAEFLLK
108	1::sw|C0SP94|YHFQ_BACSU	Putative ABC transporter substrate-binding lipoprotein YhfQ OS=Bacillus subtilis (strain 168) GN=yhfQ PE=1 SV=1	887	35524	25.71	VYDQLKK
108	1::sw|C0SP94|YHFQ_BACSU	Putative ABC transporter substrate-binding lipoprotein YhfQ OS=Bacillus subtilis (strain 168) GN=yhfQ PE=1 SV=1	887	35524	18.93	VYDQLKK
108	1::sw|C0SP94|YHFQ_BACSU	Putative ABC transporter substrate-binding lipoprotein YhfQ OS=Bacillus subtilis (strain 168) GN=yhfQ PE=1 SV=1	887	35524	27.88	TNVPEHPK
108	1::sw|C0SP94|YHFQ_BACSU	Putative ABC transporter substrate-binding lipoprotein YhfQ OS=Bacillus subtilis (strain 168) GN=yhfQ PE=1 SV=1	887	35524	38.37	TNVPEHPK
108	1::sw|C0SP94|YHFQ_BACSU	Putative ABC transporter substrate-binding lipoprotein YhfQ OS=Bacillus subtilis (strain 168) GN=yhfQ PE=1 SV=1	887	35524	37.31	TNVPEHPK
108	1::sw|C0SP94|YHFQ_BACSU	Putative ABC transporter substrate-binding lipoprotein YhfQ OS=Bacillus subtilis (strain 168) GN=yhfQ PE=1 SV=1	887	35524	40.29	VAVTHDLGK
108	1::sw|C0SP94|YHFQ_BACSU	Putative ABC transporter substrate-binding lipoprotein YhfQ OS=Bacillus subtilis (strain 168) GN=yhfQ PE=1 SV=1	887	35524	57.97	VAVTHDLGK
108	1::sw|C0SP94|YHFQ_BACSU	Putative ABC transporter substrate-binding lipoprotein YhfQ OS=Bacillus subtilis (strain 168) GN=yhfQ PE=1 SV=1	887	35524	55.27	TDDLDADGK
108	1::sw|C0SP94|YHFQ_BACSU	Putative ABC transporter substrate-binding lipoprotein YhfQ OS=Bacillus subtilis (strain 168) GN=yhfQ PE=1 SV=1	887	35524	44.69	TDDLDADGK
108	1::sw|C0SP94|YHFQ_BACSU	Putative ABC transporter substrate-binding lipoprotein YhfQ OS=Bacillus subtilis (strain 168) GN=yhfQ PE=1 SV=1	887	35524	21.6	LLTQVGYR
108	1::sw|C0SP94|YHFQ_BACSU	Putative ABC transporter substrate-binding lipoprotein YhfQ OS=Bacillus subtilis (strain 168) GN=yhfQ PE=1 SV=1	887	35524	42.95	LLTQVGYR
108	1::sw|C0SP94|YHFQ_BACSU	Putative ABC transporter substrate-binding lipoprotein YhfQ OS=Bacillus subtilis (strain 168) GN=yhfQ PE=1 SV=1	887	35524	41.09	LLTQVGYR
108	1::sw|C0SP94|YHFQ_BACSU	Putative ABC transporter substrate-binding lipoprotein YhfQ OS=Bacillus subtilis (strain 168) GN=yhfQ PE=1 SV=1	887	35524	50.74	LLTQVGYR
108	1::sw|C0SP94|YHFQ_BACSU	Putative ABC transporter substrate-binding lipoprotein YhfQ OS=Bacillus subtilis (strain 168) GN=yhfQ PE=1 SV=1	887	35524	28.4	LLTQVGYR
108	1::sw|C0SP94|YHFQ_BACSU	Putative ABC transporter substrate-binding lipoprotein YhfQ OS=Bacillus subtilis (strain 168) GN=yhfQ PE=1 SV=1	887	35524	38.76	LLTQVGYR
108	1::sw|C0SP94|YHFQ_BACSU	Putative ABC transporter substrate-binding lipoprotein YhfQ OS=Bacillus subtilis (strain 168) GN=yhfQ PE=1 SV=1	887	35524	51.59	LLTQVGYR
108	1::sw|C0SP94|YHFQ_BACSU	Putative ABC transporter substrate-binding lipoprotein YhfQ OS=Bacillus subtilis (strain 168) GN=yhfQ PE=1 SV=1	887	35524	46.66	LLTQVGYR
108	1::sw|C0SP94|YHFQ_BACSU	Putative ABC transporter substrate-binding lipoprotein YhfQ OS=Bacillus subtilis (strain 168) GN=yhfQ PE=1 SV=1	887	35524	48.55	LLTQVGYR
108	1::sw|C0SP94|YHFQ_BACSU	Putative ABC transporter substrate-binding lipoprotein YhfQ OS=Bacillus subtilis (strain 168) GN=yhfQ PE=1 SV=1	887	35524	24.54	MTLEQLLK
108	1::sw|C0SP94|YHFQ_BACSU	Putative ABC transporter substrate-binding lipoprotein YhfQ OS=Bacillus subtilis (strain 168) GN=yhfQ PE=1 SV=1	887	35524	33.82	DENFFTSR
108	1::sw|C0SP94|YHFQ_BACSU	Putative ABC transporter substrate-binding lipoprotein YhfQ OS=Bacillus subtilis (strain 168) GN=yhfQ PE=1 SV=1	887	35524	31.68	DENFFTSR
108	1::sw|C0SP94|YHFQ_BACSU	Putative ABC transporter substrate-binding lipoprotein YhfQ OS=Bacillus subtilis (strain 168) GN=yhfQ PE=1 SV=1	887	35524	63.81	IDGYTSVGTR
108	1::sw|C0SP94|YHFQ_BACSU	Putative ABC transporter substrate-binding lipoprotein YhfQ OS=Bacillus subtilis (strain 168) GN=yhfQ PE=1 SV=1	887	35524	20.05	IDGYTSVGTR
108	1::sw|C0SP94|YHFQ_BACSU	Putative ABC transporter substrate-binding lipoprotein YhfQ OS=Bacillus subtilis (strain 168) GN=yhfQ PE=1 SV=1	887	35524	34.84	TNVPEHPKR
108	1::sw|C0SP94|YHFQ_BACSU	Putative ABC transporter substrate-binding lipoprotein YhfQ OS=Bacillus subtilis (strain 168) GN=yhfQ PE=1 SV=1	887	35524	25.11	TNVPEHPKR
108	1::sw|C0SP94|YHFQ_BACSU	Putative ABC transporter substrate-binding lipoprotein YhfQ OS=Bacillus subtilis (strain 168) GN=yhfQ PE=1 SV=1	887	35524	50.03	NGHVYHVDR
108	1::sw|C0SP94|YHFQ_BACSU	Putative ABC transporter substrate-binding lipoprotein YhfQ OS=Bacillus subtilis (strain 168) GN=yhfQ PE=1 SV=1	887	35524	27.02	NGHVYHVDR
108	1::sw|C0SP94|YHFQ_BACSU	Putative ABC transporter substrate-binding lipoprotein YhfQ OS=Bacillus subtilis (strain 168) GN=yhfQ PE=1 SV=1	887	35524	65.96	KIDGYTSVGTR
108	1::sw|C0SP94|YHFQ_BACSU	Putative ABC transporter substrate-binding lipoprotein YhfQ OS=Bacillus subtilis (strain 168) GN=yhfQ PE=1 SV=1	887	35524	26.56	KIDGYTSVGTR
108	1::sw|C0SP94|YHFQ_BACSU	Putative ABC transporter substrate-binding lipoprotein YhfQ OS=Bacillus subtilis (strain 168) GN=yhfQ PE=1 SV=1	887	35524	65.51	TDPDVIILMTGK
108	1::sw|C0SP94|YHFQ_BACSU	Putative ABC transporter substrate-binding lipoprotein YhfQ OS=Bacillus subtilis (strain 168) GN=yhfQ PE=1 SV=1	887	35524	34.19	TDPDVIILMTGK
108	1::sw|C0SP94|YHFQ_BACSU	Putative ABC transporter substrate-binding lipoprotein YhfQ OS=Bacillus subtilis (strain 168) GN=yhfQ PE=1 SV=1	887	35524	50.51	TDPDVIILMTGK
108	1::sw|C0SP94|YHFQ_BACSU	Putative ABC transporter substrate-binding lipoprotein YhfQ OS=Bacillus subtilis (strain 168) GN=yhfQ PE=1 SV=1	887	35524	33.34	TDPDVIILMTGK	Oxidation (M)
108	1::sw|C0SP94|YHFQ_BACSU	Putative ABC transporter substrate-binding lipoprotein YhfQ OS=Bacillus subtilis (strain 168) GN=yhfQ PE=1 SV=1	887	35524	63.7	SVDGANAILDELQK
108	1::sw|C0SP94|YHFQ_BACSU	Putative ABC transporter substrate-binding lipoprotein YhfQ OS=Bacillus subtilis (strain 168) GN=yhfQ PE=1 SV=1	887	35524	88.31	SVDGANAILDELQK
108	1::sw|C0SP94|YHFQ_BACSU	Putative ABC transporter substrate-binding lipoprotein YhfQ OS=Bacillus subtilis (strain 168) GN=yhfQ PE=1 SV=1	887	35524	72.23	SVDGANAILDELQK
108	1::sw|C0SP94|YHFQ_BACSU	Putative ABC transporter substrate-binding lipoprotein YhfQ OS=Bacillus subtilis (strain 168) GN=yhfQ PE=1 SV=1	887	35524	69.09	IASLKPDLIIADTTR
108	1::sw|C0SP94|YHFQ_BACSU	Putative ABC transporter substrate-binding lipoprotein YhfQ OS=Bacillus subtilis (strain 168) GN=yhfQ PE=1 SV=1	887	35524	34.18	IASLKPDLIIADTTR
108	1::sw|C0SP94|YHFQ_BACSU	Putative ABC transporter substrate-binding lipoprotein YhfQ OS=Bacillus subtilis (strain 168) GN=yhfQ PE=1 SV=1	887	35524	35.58	ISANSQSVLLIGNTNDTIMAR
108	1::sw|C0SP94|YHFQ_BACSU	Putative ABC transporter substrate-binding lipoprotein YhfQ OS=Bacillus subtilis (strain 168) GN=yhfQ PE=1 SV=1	887	35524	59.43	IAPTIALNNLNADYQDTIDASLTIAK
147	1::sw|C0SP98|YKFD_BACSU	Putative oligopeptide transport ATP-binding protein YkfD OS=Bacillus subtilis (strain 168) GN=ykfD PE=3 SV=1	662	37546	34.59	MHFDAGK
147	1::sw|C0SP98|YKFD_BACSU	Putative oligopeptide transport ATP-binding protein YkfD OS=Bacillus subtilis (strain 168) GN=ykfD PE=3 SV=1	662	37546	22.8	EQFAFNR
147	1::sw|C0SP98|YKFD_BACSU	Putative oligopeptide transport ATP-binding protein YkfD OS=Bacillus subtilis (strain 168) GN=ykfD PE=3 SV=1	662	37546	18.92	EQFAFNR
147	1::sw|C0SP98|YKFD_BACSU	Putative oligopeptide transport ATP-binding protein YkfD OS=Bacillus subtilis (strain 168) GN=ykfD PE=3 SV=1	662	37546	32.03	FVACHLYR
147	1::sw|C0SP98|YKFD_BACSU	Putative oligopeptide transport ATP-binding protein YkfD OS=Bacillus subtilis (strain 168) GN=ykfD PE=3 SV=1	662	37546	36.69	FVACHLYR
147	1::sw|C0SP98|YKFD_BACSU	Putative oligopeptide transport ATP-binding protein YkfD OS=Bacillus subtilis (strain 168) GN=ykfD PE=3 SV=1	662	37546	38.77	GTNLHALSEK
147	1::sw|C0SP98|YKFD_BACSU	Putative oligopeptide transport ATP-binding protein YkfD OS=Bacillus subtilis (strain 168) GN=ykfD PE=3 SV=1	662	37546	40.1	GTNLHALSEK
147	1::sw|C0SP98|YKFD_BACSU	Putative oligopeptide transport ATP-binding protein YkfD OS=Bacillus subtilis (strain 168) GN=ykfD PE=3 SV=1	662	37546	39.92	AVDGVTFQIR
147	1::sw|C0SP98|YKFD_BACSU	Putative oligopeptide transport ATP-binding protein YkfD OS=Bacillus subtilis (strain 168) GN=ykfD PE=3 SV=1	662	37546	57.3	AVDGVTFQIR
147	1::sw|C0SP98|YKFD_BACSU	Putative oligopeptide transport ATP-binding protein YkfD OS=Bacillus subtilis (strain 168) GN=ykfD PE=3 SV=1	662	37546	39.86	LPLLEVSQLK
147	1::sw|C0SP98|YKFD_BACSU	Putative oligopeptide transport ATP-binding protein YkfD OS=Bacillus subtilis (strain 168) GN=ykfD PE=3 SV=1	662	37546	54.16	LPLLEVSQLK
147	1::sw|C0SP98|YKFD_BACSU	Putative oligopeptide transport ATP-binding protein YkfD OS=Bacillus subtilis (strain 168) GN=ykfD PE=3 SV=1	662	37546	20.05	YPHEFSGGQR
147	1::sw|C0SP98|YKFD_BACSU	Putative oligopeptide transport ATP-binding protein YkfD OS=Bacillus subtilis (strain 168) GN=ykfD PE=3 SV=1	662	37546	21.25	YPHEFSGGQR
147	1::sw|C0SP98|YKFD_BACSU	Putative oligopeptide transport ATP-binding protein YkfD OS=Bacillus subtilis (strain 168) GN=ykfD PE=3 SV=1	662	37546	30.28	RLPLLEVSQLK
147	1::sw|C0SP98|YKFD_BACSU	Putative oligopeptide transport ATP-binding protein YkfD OS=Bacillus subtilis (strain 168) GN=ykfD PE=3 SV=1	662	37546	47.59	LYQPTEGSVTYR
147	1::sw|C0SP98|YKFD_BACSU	Putative oligopeptide transport ATP-binding protein YkfD OS=Bacillus subtilis (strain 168) GN=ykfD PE=3 SV=1	662	37546	32	LYQPTEGSVTYR
147	1::sw|C0SP98|YKFD_BACSU	Putative oligopeptide transport ATP-binding protein YkfD OS=Bacillus subtilis (strain 168) GN=ykfD PE=3 SV=1	662	37546	38.3	LYQPTEGSVTYR
147	1::sw|C0SP98|YKFD_BACSU	Putative oligopeptide transport ATP-binding protein YkfD OS=Bacillus subtilis (strain 168) GN=ykfD PE=3 SV=1	662	37546	60.57	LYQPTEGSVTYR
147	1::sw|C0SP98|YKFD_BACSU	Putative oligopeptide transport ATP-binding protein YkfD OS=Bacillus subtilis (strain 168) GN=ykfD PE=3 SV=1	662	37546	18.1	LYQPTEGSVTYR
147	1::sw|C0SP98|YKFD_BACSU	Putative oligopeptide transport ATP-binding protein YkfD OS=Bacillus subtilis (strain 168) GN=ykfD PE=3 SV=1	662	37546	51.9	EGETFGLVGESGCGK
147	1::sw|C0SP98|YKFD_BACSU	Putative oligopeptide transport ATP-binding protein YkfD OS=Bacillus subtilis (strain 168) GN=ykfD PE=3 SV=1	662	37546	61.79	EGETFGLVGESGCGK
147	1::sw|C0SP98|YKFD_BACSU	Putative oligopeptide transport ATP-binding protein YkfD OS=Bacillus subtilis (strain 168) GN=ykfD PE=3 SV=1	662	37546	64.72	GLTFLFIAHDLSMVK
147	1::sw|C0SP98|YKFD_BACSU	Putative oligopeptide transport ATP-binding protein YkfD OS=Bacillus subtilis (strain 168) GN=ykfD PE=3 SV=1	662	37546	67.49	LQMIFQDPYASLNPR
147	1::sw|C0SP98|YKFD_BACSU	Putative oligopeptide transport ATP-binding protein YkfD OS=Bacillus subtilis (strain 168) GN=ykfD PE=3 SV=1	662	37546	18.92	ALLSSIPIPDPELEDKR
147	1::sw|C0SP98|YKFD_BACSU	Putative oligopeptide transport ATP-binding protein YkfD OS=Bacillus subtilis (strain 168) GN=ykfD PE=3 SV=1	662	37546	25.25	EIILEPMEIHNLYNTHK
147	1::sw|C0SP98|YKFD_BACSU	Putative oligopeptide transport ATP-binding protein YkfD OS=Bacillus subtilis (strain 168) GN=ykfD PE=3 SV=1	662	37546	21.31	EIILEPMEIHNLYNTHK
147	1::sw|C0SP98|YKFD_BACSU	Putative oligopeptide transport ATP-binding protein YkfD OS=Bacillus subtilis (strain 168) GN=ykfD PE=3 SV=1	662	37546	84.67	LLVVDELLEAVGLHPDFGSR
147	1::sw|C0SP98|YKFD_BACSU	Putative oligopeptide transport ATP-binding protein YkfD OS=Bacillus subtilis (strain 168) GN=ykfD PE=3 SV=1	662	37546	101.46	LLVVDELLEAVGLHPDFGSR
147	1::sw|C0SP98|YKFD_BACSU	Putative oligopeptide transport ATP-binding protein YkfD OS=Bacillus subtilis (strain 168) GN=ykfD PE=3 SV=1	662	37546	35.74	LLVVDELLEAVGLHPDFGSR
1098	1::sw|C0SPA3|YLXW_BACSU	UPF0749 protein YlxW OS=Bacillus subtilis (strain 168) GN=ylxW PE=2 SV=1	21	26026	21.3	SAAETEEWKK
519	1::sw|C0SPA7|YUKB_BACSU	Ftsk domain-containing protein YukB OS=Bacillus subtilis (strain 168) GN=yukB PE=4 SV=1	135	171971	28.85	QGDAQNLR
519	1::sw|C0SPA7|YUKB_BACSU	Ftsk domain-containing protein YukB OS=Bacillus subtilis (strain 168) GN=yukB PE=4 SV=1	135	171971	30.26	FQQTIDTR
519	1::sw|C0SPA7|YUKB_BACSU	Ftsk domain-containing protein YukB OS=Bacillus subtilis (strain 168) GN=yukB PE=4 SV=1	135	171971	20.49	ALASIKSELK
519	1::sw|C0SPA7|YUKB_BACSU	Ftsk domain-containing protein YukB OS=Bacillus subtilis (strain 168) GN=yukB PE=4 SV=1	135	171971	18.21	GFIYNEQTR
519	1::sw|C0SPA7|YUKB_BACSU	Ftsk domain-containing protein YukB OS=Bacillus subtilis (strain 168) GN=yukB PE=4 SV=1	135	171971	20.27	GYDSLTTEMK
519	1::sw|C0SPA7|YUKB_BACSU	Ftsk domain-containing protein YukB OS=Bacillus subtilis (strain 168) GN=yukB PE=4 SV=1	135	171971	46.23	ESLSENITTLVR
519	1::sw|C0SPA7|YUKB_BACSU	Ftsk domain-containing protein YukB OS=Bacillus subtilis (strain 168) GN=yukB PE=4 SV=1	135	171971	47.38	DQLLSSLYELIR
519	1::sw|C0SPA7|YUKB_BACSU	Ftsk domain-containing protein YukB OS=Bacillus subtilis (strain 168) GN=yukB PE=4 SV=1	135	171971	59.41	FSQVVLMIDGITR
519	1::sw|C0SPA7|YUKB_BACSU	Ftsk domain-containing protein YukB OS=Bacillus subtilis (strain 168) GN=yukB PE=4 SV=1	135	171971	23.91	LNLSNLPSSHPVTIGPDVK
479	1::sw|C0SPB0|YTCI_BACSU	Uncharacterized acyl--CoA ligase YtcI OS=Bacillus subtilis (strain 168) GN=ytcI PE=3 SV=1	150	59573	22.63	IEHAEVK
479	1::sw|C0SPB0|YTCI_BACSU	Uncharacterized acyl--CoA ligase YtcI OS=Bacillus subtilis (strain 168) GN=ytcI PE=3 SV=1	150	59573	25.86	EYFKDPER
479	1::sw|C0SPB0|YTCI_BACSU	Uncharacterized acyl--CoA ligase YtcI OS=Bacillus subtilis (strain 168) GN=ytcI PE=3 SV=1	150	59573	30.48	ECAVVASPDEIR
479	1::sw|C0SPB0|YTCI_BACSU	Uncharacterized acyl--CoA ligase YtcI OS=Bacillus subtilis (strain 168) GN=ytcI PE=3 SV=1	150	59573	74.14	GAIVYSEFIGAFR
479	1::sw|C0SPB0|YTCI_BACSU	Uncharacterized acyl--CoA ligase YtcI OS=Bacillus subtilis (strain 168) GN=ytcI PE=3 SV=1	150	59573	70.9	GAIVYSEFIGAFR
479	1::sw|C0SPB0|YTCI_BACSU	Uncharacterized acyl--CoA ligase YtcI OS=Bacillus subtilis (strain 168) GN=ytcI PE=3 SV=1	150	59573	23.41	LITLSIGENDAGWK
658	1::sw|C0SPB2|YWTG_BACSU	Putative metabolite transport protein YwtG OS=Bacillus subtilis (strain 168) GN=ywtG PE=3 SV=1	87	49276	39.46	DIDQEIHDIK
658	1::sw|C0SPB2|YWTG_BACSU	Putative metabolite transport protein YwtG OS=Bacillus subtilis (strain 168) GN=ywtG PE=3 SV=1	87	49276	20.12	DIDQEIHDIK
658	1::sw|C0SPB2|YWTG_BACSU	Putative metabolite transport protein YwtG OS=Bacillus subtilis (strain 168) GN=ywtG PE=3 SV=1	87	49276	52.26	SLEEIEQDLR
658	1::sw|C0SPB2|YWTG_BACSU	Putative metabolite transport protein YwtG OS=Bacillus subtilis (strain 168) GN=ywtG PE=3 SV=1	87	49276	32.36	SLEEIEQDLR
482	1::sw|C0SPB4|YHAQ_BACSU	Uncharacterized ABC transporter ATP-binding protein YhaQ OS=Bacillus subtilis (strain 168) GN=yhaQ PE=3 SV=1	150	33951	24.25	IGYLPEER
482	1::sw|C0SPB4|YHAQ_BACSU	Uncharacterized ABC transporter ATP-binding protein YhaQ OS=Bacillus subtilis (strain 168) GN=yhaQ PE=3 SV=1	150	33951	30.28	IGYLPEER
482	1::sw|C0SPB4|YHAQ_BACSU	Uncharacterized ABC transporter ATP-binding protein YhaQ OS=Bacillus subtilis (strain 168) GN=yhaQ PE=3 SV=1	150	33951	19.02	IGYLPEER
482	1::sw|C0SPB4|YHAQ_BACSU	Uncharacterized ABC transporter ATP-binding protein YhaQ OS=Bacillus subtilis (strain 168) GN=yhaQ PE=3 SV=1	150	33951	28.82	IGYLPEER
482	1::sw|C0SPB4|YHAQ_BACSU	Uncharacterized ABC transporter ATP-binding protein YhaQ OS=Bacillus subtilis (strain 168) GN=yhaQ PE=3 SV=1	150	33951	29.72	DQLVYLAR
482	1::sw|C0SPB4|YHAQ_BACSU	Uncharacterized ABC transporter ATP-binding protein YhaQ OS=Bacillus subtilis (strain 168) GN=yhaQ PE=3 SV=1	150	33951	33.65	MLTIDHVTK
482	1::sw|C0SPB4|YHAQ_BACSU	Uncharacterized ABC transporter ATP-binding protein YhaQ OS=Bacillus subtilis (strain 168) GN=yhaQ PE=3 SV=1	150	33951	39.79	FNITDYENK
482	1::sw|C0SPB4|YHAQ_BACSU	Uncharacterized ABC transporter ATP-binding protein YhaQ OS=Bacillus subtilis (strain 168) GN=yhaQ PE=3 SV=1	150	33951	26.53	NVTIHSDDDLR
482	1::sw|C0SPB4|YHAQ_BACSU	Uncharacterized ABC transporter ATP-binding protein YhaQ OS=Bacillus subtilis (strain 168) GN=yhaQ PE=3 SV=1	150	33951	29.25	NVTIHSDDDLR
482	1::sw|C0SPB4|YHAQ_BACSU	Uncharacterized ABC transporter ATP-binding protein YhaQ OS=Bacillus subtilis (strain 168) GN=yhaQ PE=3 SV=1	150	33951	43.56	NSGVSILFSSHR
482	1::sw|C0SPB4|YHAQ_BACSU	Uncharacterized ABC transporter ATP-binding protein YhaQ OS=Bacillus subtilis (strain 168) GN=yhaQ PE=3 SV=1	150	33951	29.02	FLQSHEGILQWK
482	1::sw|C0SPB4|YHAQ_BACSU	Uncharacterized ABC transporter ATP-binding protein YhaQ OS=Bacillus subtilis (strain 168) GN=yhaQ PE=3 SV=1	150	33951	24.84	KFELEEPSLHDIFIEK
482	1::sw|C0SPB4|YHAQ_BACSU	Uncharacterized ABC transporter ATP-binding protein YhaQ OS=Bacillus subtilis (strain 168) GN=yhaQ PE=3 SV=1	150	33951	26.17	KFELEEPSLHDIFIEK
1021	1::sw|O05229|MRPD_BACSU	Na(+)/H(+) antiporter subunit D OS=Bacillus subtilis (strain 168) GN=mrpD PE=1 SV=3	29	53442	29.48	YIEAVLKE
896	1::sw|O05236|YUGG_BACSU	Uncharacterized HTH-type transcriptional regulator YugG OS=Bacillus subtilis (strain 168) GN=yugG PE=4 SV=2	45	18749	34	GVGFDEVAER
896	1::sw|O05236|YUGG_BACSU	Uncharacterized HTH-type transcriptional regulator YugG OS=Bacillus subtilis (strain 168) GN=yugG PE=4 SV=2	45	18749	30.87	VFETGDDDKR
1084	1::sw|O05239|YUGJ_BACSU	Probable NADH-dependent butanol dehydrogenase 1 OS=Bacillus subtilis (strain 168) GN=yugJ PE=3 SV=1	23	42877	23.24	HTLSENPAR
380	1::sw|O05248|YUGP_BACSU	Putative membrane protease YugP OS=Bacillus subtilis (strain 168) GN=yugP PE=4 SV=1	206	24679	48.58	LSEPVYYGR
380	1::sw|O05248|YUGP_BACSU	Putative membrane protease YugP OS=Bacillus subtilis (strain 168) GN=yugP PE=4 SV=1	206	24679	46.54	LSEPVYYGR
380	1::sw|O05248|YUGP_BACSU	Putative membrane protease YugP OS=Bacillus subtilis (strain 168) GN=yugP PE=4 SV=1	206	24679	54	LSEPVYYGR
380	1::sw|O05248|YUGP_BACSU	Putative membrane protease YugP OS=Bacillus subtilis (strain 168) GN=yugP PE=4 SV=1	206	24679	53.42	LSEPVYYGR
380	1::sw|O05248|YUGP_BACSU	Putative membrane protease YugP OS=Bacillus subtilis (strain 168) GN=yugP PE=4 SV=1	206	24679	46.89	QIIVSEGFIR
380	1::sw|O05248|YUGP_BACSU	Putative membrane protease YugP OS=Bacillus subtilis (strain 168) GN=yugP PE=4 SV=1	206	24679	35.63	QIIVSEGFIR
380	1::sw|O05248|YUGP_BACSU	Putative membrane protease YugP OS=Bacillus subtilis (strain 168) GN=yugP PE=4 SV=1	206	24679	47.43	ILDINGLYDVPVEPVR
573	1::sw|O05250|MALK_BACSU	Sensor histidine kinase MalK OS=Bacillus subtilis (strain 168) GN=malK PE=3 SV=1	115	59064	20.91	DIAIQQK
573	1::sw|O05250|MALK_BACSU	Sensor histidine kinase MalK OS=Bacillus subtilis (strain 168) GN=malK PE=3 SV=1	115	59064	22.31	VFEQGYSTK
573	1::sw|O05250|MALK_BACSU	Sensor histidine kinase MalK OS=Bacillus subtilis (strain 168) GN=malK PE=3 SV=1	115	59064	19.55	AQSHEFMNK
573	1::sw|O05250|MALK_BACSU	Sensor histidine kinase MalK OS=Bacillus subtilis (strain 168) GN=malK PE=3 SV=1	115	59064	44.64	SSVLAGFLLGK
573	1::sw|O05250|MALK_BACSU	Sensor histidine kinase MalK OS=Bacillus subtilis (strain 168) GN=malK PE=3 SV=1	115	59064	53.39	GQTVGAIATFR
573	1::sw|O05250|MALK_BACSU	Sensor histidine kinase MalK OS=Bacillus subtilis (strain 168) GN=malK PE=3 SV=1	115	59064	51.98	GQTVGAIATFR
980	1::sw|O05251|MALR_BACSU	Transcriptional regulatory protein MalR OS=Bacillus subtilis (strain 168) GN=malR PE=3 SV=1	34	26948	34.03	YGAVDYLIKPFEFER
17	1::sw|O05252|YUFN_BACSU	Uncharacterized lipoprotein YufN OS=Bacillus subtilis (strain 168) GN=yufN PE=3 SV=2	3027	38395	23.47	KFEVGFR
17	1::sw|O05252|YUFN_BACSU	Uncharacterized lipoprotein YufN OS=Bacillus subtilis (strain 168) GN=yufN PE=3 SV=2	3027	38395	21.91	KFEVGFR
17	1::sw|O05252|YUFN_BACSU	Uncharacterized lipoprotein YufN OS=Bacillus subtilis (strain 168) GN=yufN PE=3 SV=2	3027	38395	24.58	KFEVGFR
17	1::sw|O05252|YUFN_BACSU	Uncharacterized lipoprotein YufN OS=Bacillus subtilis (strain 168) GN=yufN PE=3 SV=2	3027	38395	24.35	KFEVGFR
17	1::sw|O05252|YUFN_BACSU	Uncharacterized lipoprotein YufN OS=Bacillus subtilis (strain 168) GN=yufN PE=3 SV=2	3027	38395	27.77	KFEVGFR
17	1::sw|O05252|YUFN_BACSU	Uncharacterized lipoprotein YufN OS=Bacillus subtilis (strain 168) GN=yufN PE=3 SV=2	3027	38395	44.56	KFEVGFR
17	1::sw|O05252|YUFN_BACSU	Uncharacterized lipoprotein YufN OS=Bacillus subtilis (strain 168) GN=yufN PE=3 SV=2	3027	38395	49.43	KFEVGFR
17	1::sw|O05252|YUFN_BACSU	Uncharacterized lipoprotein YufN OS=Bacillus subtilis (strain 168) GN=yufN PE=3 SV=2	3027	38395	24.02	KFEVGFR
17	1::sw|O05252|YUFN_BACSU	Uncharacterized lipoprotein YufN OS=Bacillus subtilis (strain 168) GN=yufN PE=3 SV=2	3027	38395	47.67	KFEVGFR
17	1::sw|O05252|YUFN_BACSU	Uncharacterized lipoprotein YufN OS=Bacillus subtilis (strain 168) GN=yufN PE=3 SV=2	3027	38395	47.43	KFEVGFR
17	1::sw|O05252|YUFN_BACSU	Uncharacterized lipoprotein YufN OS=Bacillus subtilis (strain 168) GN=yufN PE=3 SV=2	3027	38395	28.97	KFEVGFR
17	1::sw|O05252|YUFN_BACSU	Uncharacterized lipoprotein YufN OS=Bacillus subtilis (strain 168) GN=yufN PE=3 SV=2	3027	38395	44.47	AGVQAVNPK
17	1::sw|O05252|YUFN_BACSU	Uncharacterized lipoprotein YufN OS=Bacillus subtilis (strain 168) GN=yufN PE=3 SV=2	3027	38395	45.53	AGVQAVNPK
17	1::sw|O05252|YUFN_BACSU	Uncharacterized lipoprotein YufN OS=Bacillus subtilis (strain 168) GN=yufN PE=3 SV=2	3027	38395	50.84	AGVQAVNPK
17	1::sw|O05252|YUFN_BACSU	Uncharacterized lipoprotein YufN OS=Bacillus subtilis (strain 168) GN=yufN PE=3 SV=2	3027	38395	38.3	AGVQAVNPK
17	1::sw|O05252|YUFN_BACSU	Uncharacterized lipoprotein YufN OS=Bacillus subtilis (strain 168) GN=yufN PE=3 SV=2	3027	38395	54.78	AGVQAVNPK
17	1::sw|O05252|YUFN_BACSU	Uncharacterized lipoprotein YufN OS=Bacillus subtilis (strain 168) GN=yufN PE=3 SV=2	3027	38395	61.82	AGVQAVNPK
17	1::sw|O05252|YUFN_BACSU	Uncharacterized lipoprotein YufN OS=Bacillus subtilis (strain 168) GN=yufN PE=3 SV=2	3027	38395	33.86	AGVQAVNPK
17	1::sw|O05252|YUFN_BACSU	Uncharacterized lipoprotein YufN OS=Bacillus subtilis (strain 168) GN=yufN PE=3 SV=2	3027	38395	52.66	AGVQAVNPK
17	1::sw|O05252|YUFN_BACSU	Uncharacterized lipoprotein YufN OS=Bacillus subtilis (strain 168) GN=yufN PE=3 SV=2	3027	38395	45.53	AGVQAVNPK
17	1::sw|O05252|YUFN_BACSU	Uncharacterized lipoprotein YufN OS=Bacillus subtilis (strain 168) GN=yufN PE=3 SV=2	3027	38395	35.79	ATAESMYK
17	1::sw|O05252|YUFN_BACSU	Uncharacterized lipoprotein YufN OS=Bacillus subtilis (strain 168) GN=yufN PE=3 SV=2	3027	38395	36.98	ATAESMYK
17	1::sw|O05252|YUFN_BACSU	Uncharacterized lipoprotein YufN OS=Bacillus subtilis (strain 168) GN=yufN PE=3 SV=2	3027	38395	28.13	ATAESMYK
17	1::sw|O05252|YUFN_BACSU	Uncharacterized lipoprotein YufN OS=Bacillus subtilis (strain 168) GN=yufN PE=3 SV=2	3027	38395	29.92	ATAESMYK
17	1::sw|O05252|YUFN_BACSU	Uncharacterized lipoprotein YufN OS=Bacillus subtilis (strain 168) GN=yufN PE=3 SV=2	3027	38395	21.36	DNVASITFK
17	1::sw|O05252|YUFN_BACSU	Uncharacterized lipoprotein YufN OS=Bacillus subtilis (strain 168) GN=yufN PE=3 SV=2	3027	38395	59.9	QNLSDDVIK
17	1::sw|O05252|YUFN_BACSU	Uncharacterized lipoprotein YufN OS=Bacillus subtilis (strain 168) GN=yufN PE=3 SV=2	3027	38395	65.08	QNLSDDVIK
17	1::sw|O05252|YUFN_BACSU	Uncharacterized lipoprotein YufN OS=Bacillus subtilis (strain 168) GN=yufN PE=3 SV=2	3027	38395	53.65	QNLSDDVIK
17	1::sw|O05252|YUFN_BACSU	Uncharacterized lipoprotein YufN OS=Bacillus subtilis (strain 168) GN=yufN PE=3 SV=2	3027	38395	34.07	QNLSDDVIK
17	1::sw|O05252|YUFN_BACSU	Uncharacterized lipoprotein YufN OS=Bacillus subtilis (strain 168) GN=yufN PE=3 SV=2	3027	38395	39.41	QNLSDDVIK
17	1::sw|O05252|YUFN_BACSU	Uncharacterized lipoprotein YufN OS=Bacillus subtilis (strain 168) GN=yufN PE=3 SV=2	3027	38395	48.76	NGYDYLQSK
17	1::sw|O05252|YUFN_BACSU	Uncharacterized lipoprotein YufN OS=Bacillus subtilis (strain 168) GN=yufN PE=3 SV=2	3027	38395	28.22	VDTVVEDVTK
17	1::sw|O05252|YUFN_BACSU	Uncharacterized lipoprotein YufN OS=Bacillus subtilis (strain 168) GN=yufN PE=3 SV=2	3027	38395	26.67	VDTVVEDVTK
17	1::sw|O05252|YUFN_BACSU	Uncharacterized lipoprotein YufN OS=Bacillus subtilis (strain 168) GN=yufN PE=3 SV=2	3027	38395	81.92	KVDTVVEDVTK
17	1::sw|O05252|YUFN_BACSU	Uncharacterized lipoprotein YufN OS=Bacillus subtilis (strain 168) GN=yufN PE=3 SV=2	3027	38395	61.75	KVDTVVEDVTK
17	1::sw|O05252|YUFN_BACSU	Uncharacterized lipoprotein YufN OS=Bacillus subtilis (strain 168) GN=yufN PE=3 SV=2	3027	38395	45.24	KVDTVVEDVTK
17	1::sw|O05252|YUFN_BACSU	Uncharacterized lipoprotein YufN OS=Bacillus subtilis (strain 168) GN=yufN PE=3 SV=2	3027	38395	47.45	KVDTVVEDVTK
17	1::sw|O05252|YUFN_BACSU	Uncharacterized lipoprotein YufN OS=Bacillus subtilis (strain 168) GN=yufN PE=3 SV=2	3027	38395	82.36	KVDTVVEDVTK
17	1::sw|O05252|YUFN_BACSU	Uncharacterized lipoprotein YufN OS=Bacillus subtilis (strain 168) GN=yufN PE=3 SV=2	3027	38395	76.99	KVDTVVEDVTK
17	1::sw|O05252|YUFN_BACSU	Uncharacterized lipoprotein YufN OS=Bacillus subtilis (strain 168) GN=yufN PE=3 SV=2	3027	38395	64.43	KVDTVVEDVTK
17	1::sw|O05252|YUFN_BACSU	Uncharacterized lipoprotein YufN OS=Bacillus subtilis (strain 168) GN=yufN PE=3 SV=2	3027	38395	80.97	KVDTVVEDVTK
17	1::sw|O05252|YUFN_BACSU	Uncharacterized lipoprotein YufN OS=Bacillus subtilis (strain 168) GN=yufN PE=3 SV=2	3027	38395	65.24	KVDTVVEDVTK
17	1::sw|O05252|YUFN_BACSU	Uncharacterized lipoprotein YufN OS=Bacillus subtilis (strain 168) GN=yufN PE=3 SV=2	3027	38395	66.37	SDADYTTNLNK
17	1::sw|O05252|YUFN_BACSU	Uncharacterized lipoprotein YufN OS=Bacillus subtilis (strain 168) GN=yufN PE=3 SV=2	3027	38395	87.46	SDADYTTNLNK
17	1::sw|O05252|YUFN_BACSU	Uncharacterized lipoprotein YufN OS=Bacillus subtilis (strain 168) GN=yufN PE=3 SV=2	3027	38395	58.92	SDADYTTNLNK
17	1::sw|O05252|YUFN_BACSU	Uncharacterized lipoprotein YufN OS=Bacillus subtilis (strain 168) GN=yufN PE=3 SV=2	3027	38395	83.59	SDADYTTNLNK
17	1::sw|O05252|YUFN_BACSU	Uncharacterized lipoprotein YufN OS=Bacillus subtilis (strain 168) GN=yufN PE=3 SV=2	3027	38395	49.3	SDADYTTNLNK
17	1::sw|O05252|YUFN_BACSU	Uncharacterized lipoprotein YufN OS=Bacillus subtilis (strain 168) GN=yufN PE=3 SV=2	3027	38395	45.78	SDADYTTNLNK
17	1::sw|O05252|YUFN_BACSU	Uncharacterized lipoprotein YufN OS=Bacillus subtilis (strain 168) GN=yufN PE=3 SV=2	3027	38395	28.47	SDADYTTNLNK
17	1::sw|O05252|YUFN_BACSU	Uncharacterized lipoprotein YufN OS=Bacillus subtilis (strain 168) GN=yufN PE=3 SV=2	3027	38395	62.99	IIDGLEIPATEK
17	1::sw|O05252|YUFN_BACSU	Uncharacterized lipoprotein YufN OS=Bacillus subtilis (strain 168) GN=yufN PE=3 SV=2	3027	38395	56.78	IIDGLEIPATEK
17	1::sw|O05252|YUFN_BACSU	Uncharacterized lipoprotein YufN OS=Bacillus subtilis (strain 168) GN=yufN PE=3 SV=2	3027	38395	57.38	IGFVGGMESELIK
17	1::sw|O05252|YUFN_BACSU	Uncharacterized lipoprotein YufN OS=Bacillus subtilis (strain 168) GN=yufN PE=3 SV=2	3027	38395	55.69	IGFVGGMESELIK
17	1::sw|O05252|YUFN_BACSU	Uncharacterized lipoprotein YufN OS=Bacillus subtilis (strain 168) GN=yufN PE=3 SV=2	3027	38395	49.56	IGFVGGMESELIK
17	1::sw|O05252|YUFN_BACSU	Uncharacterized lipoprotein YufN OS=Bacillus subtilis (strain 168) GN=yufN PE=3 SV=2	3027	38395	44	IGFVGGMESELIK
17	1::sw|O05252|YUFN_BACSU	Uncharacterized lipoprotein YufN OS=Bacillus subtilis (strain 168) GN=yufN PE=3 SV=2	3027	38395	81.78	IGFVGGMESELIK
17	1::sw|O05252|YUFN_BACSU	Uncharacterized lipoprotein YufN OS=Bacillus subtilis (strain 168) GN=yufN PE=3 SV=2	3027	38395	66.62	IGFVGGMESELIK
17	1::sw|O05252|YUFN_BACSU	Uncharacterized lipoprotein YufN OS=Bacillus subtilis (strain 168) GN=yufN PE=3 SV=2	3027	38395	62.71	IGFVGGMESELIK	Oxidation (M)
17	1::sw|O05252|YUFN_BACSU	Uncharacterized lipoprotein YufN OS=Bacillus subtilis (strain 168) GN=yufN PE=3 SV=2	3027	38395	40.42	IGFVGGMESELIK	Oxidation (M)
17	1::sw|O05252|YUFN_BACSU	Uncharacterized lipoprotein YufN OS=Bacillus subtilis (strain 168) GN=yufN PE=3 SV=2	3027	38395	58.92	IGFVGGMESELIK	Oxidation (M)
17	1::sw|O05252|YUFN_BACSU	Uncharacterized lipoprotein YufN OS=Bacillus subtilis (strain 168) GN=yufN PE=3 SV=2	3027	38395	58.63	NTNFAIIDAVVDK
17	1::sw|O05252|YUFN_BACSU	Uncharacterized lipoprotein YufN OS=Bacillus subtilis (strain 168) GN=yufN PE=3 SV=2	3027	38395	81.27	KIIDGLEIPATEK
17	1::sw|O05252|YUFN_BACSU	Uncharacterized lipoprotein YufN OS=Bacillus subtilis (strain 168) GN=yufN PE=3 SV=2	3027	38395	28.29	KIIDGLEIPATEK
17	1::sw|O05252|YUFN_BACSU	Uncharacterized lipoprotein YufN OS=Bacillus subtilis (strain 168) GN=yufN PE=3 SV=2	3027	38395	91.35	FSVAMVTDVGGVDDK
17	1::sw|O05252|YUFN_BACSU	Uncharacterized lipoprotein YufN OS=Bacillus subtilis (strain 168) GN=yufN PE=3 SV=2	3027	38395	53.63	FSVAMVTDVGGVDDK
17	1::sw|O05252|YUFN_BACSU	Uncharacterized lipoprotein YufN OS=Bacillus subtilis (strain 168) GN=yufN PE=3 SV=2	3027	38395	45.18	FSVAMVTDVGGVDDK
17	1::sw|O05252|YUFN_BACSU	Uncharacterized lipoprotein YufN OS=Bacillus subtilis (strain 168) GN=yufN PE=3 SV=2	3027	38395	74.2	FSVAMVTDVGGVDDK
17	1::sw|O05252|YUFN_BACSU	Uncharacterized lipoprotein YufN OS=Bacillus subtilis (strain 168) GN=yufN PE=3 SV=2	3027	38395	95.71	FSVAMVTDVGGVDDK
17	1::sw|O05252|YUFN_BACSU	Uncharacterized lipoprotein YufN OS=Bacillus subtilis (strain 168) GN=yufN PE=3 SV=2	3027	38395	68.95	FSVAMVTDVGGVDDK
17	1::sw|O05252|YUFN_BACSU	Uncharacterized lipoprotein YufN OS=Bacillus subtilis (strain 168) GN=yufN PE=3 SV=2	3027	38395	52.64	FSVAMVTDVGGVDDK	Oxidation (M)
17	1::sw|O05252|YUFN_BACSU	Uncharacterized lipoprotein YufN OS=Bacillus subtilis (strain 168) GN=yufN PE=3 SV=2	3027	38395	33.66	FSVAMVTDVGGVDDK	Oxidation (M)
17	1::sw|O05252|YUFN_BACSU	Uncharacterized lipoprotein YufN OS=Bacillus subtilis (strain 168) GN=yufN PE=3 SV=2	3027	38395	59.22	FSVAMVTDVGGVDDK	Oxidation (M)
17	1::sw|O05252|YUFN_BACSU	Uncharacterized lipoprotein YufN OS=Bacillus subtilis (strain 168) GN=yufN PE=3 SV=2	3027	38395	95.78	FSVAMVTDVGGVDDK	Oxidation (M)
17	1::sw|O05252|YUFN_BACSU	Uncharacterized lipoprotein YufN OS=Bacillus subtilis (strain 168) GN=yufN PE=3 SV=2	3027	38395	63.22	SFNQSAWEGIQAFGK
17	1::sw|O05252|YUFN_BACSU	Uncharacterized lipoprotein YufN OS=Bacillus subtilis (strain 168) GN=yufN PE=3 SV=2	3027	38395	65.99	SFNQSAWEGIQAFGK
17	1::sw|O05252|YUFN_BACSU	Uncharacterized lipoprotein YufN OS=Bacillus subtilis (strain 168) GN=yufN PE=3 SV=2	3027	38395	77.44	SFNQSAWEGIQAFGK
17	1::sw|O05252|YUFN_BACSU	Uncharacterized lipoprotein YufN OS=Bacillus subtilis (strain 168) GN=yufN PE=3 SV=2	3027	38395	60.29	SFNQSAWEGIQAFGK
17	1::sw|O05252|YUFN_BACSU	Uncharacterized lipoprotein YufN OS=Bacillus subtilis (strain 168) GN=yufN PE=3 SV=2	3027	38395	65.96	SFNQSAWEGIQAFGK
17	1::sw|O05252|YUFN_BACSU	Uncharacterized lipoprotein YufN OS=Bacillus subtilis (strain 168) GN=yufN PE=3 SV=2	3027	38395	84.72	EQEGSFLVGVAAALSSK
17	1::sw|O05252|YUFN_BACSU	Uncharacterized lipoprotein YufN OS=Bacillus subtilis (strain 168) GN=yufN PE=3 SV=2	3027	38395	73.6	EQEGSFLVGVAAALSSK
17	1::sw|O05252|YUFN_BACSU	Uncharacterized lipoprotein YufN OS=Bacillus subtilis (strain 168) GN=yufN PE=3 SV=2	3027	38395	80.42	EQEGSFLVGVAAALSSK
17	1::sw|O05252|YUFN_BACSU	Uncharacterized lipoprotein YufN OS=Bacillus subtilis (strain 168) GN=yufN PE=3 SV=2	3027	38395	84.69	EQEGSFLVGVAAALSSK
17	1::sw|O05252|YUFN_BACSU	Uncharacterized lipoprotein YufN OS=Bacillus subtilis (strain 168) GN=yufN PE=3 SV=2	3027	38395	82.89	EQEGSFLVGVAAALSSK
17	1::sw|O05252|YUFN_BACSU	Uncharacterized lipoprotein YufN OS=Bacillus subtilis (strain 168) GN=yufN PE=3 SV=2	3027	38395	77.73	EQEGSFLVGVAAALSSK
17	1::sw|O05252|YUFN_BACSU	Uncharacterized lipoprotein YufN OS=Bacillus subtilis (strain 168) GN=yufN PE=3 SV=2	3027	38395	49.03	EQEGSFLVGVAAALSSK
17	1::sw|O05252|YUFN_BACSU	Uncharacterized lipoprotein YufN OS=Bacillus subtilis (strain 168) GN=yufN PE=3 SV=2	3027	38395	22.4	EQEGSFLVGVAAALSSK
17	1::sw|O05252|YUFN_BACSU	Uncharacterized lipoprotein YufN OS=Bacillus subtilis (strain 168) GN=yufN PE=3 SV=2	3027	38395	41.51	EQEGSFLVGVAAALSSK
17	1::sw|O05252|YUFN_BACSU	Uncharacterized lipoprotein YufN OS=Bacillus subtilis (strain 168) GN=yufN PE=3 SV=2	3027	38395	19.74	EQEGSFLVGVAAALSSK
17	1::sw|O05252|YUFN_BACSU	Uncharacterized lipoprotein YufN OS=Bacillus subtilis (strain 168) GN=yufN PE=3 SV=2	3027	38395	52.35	SGVDVIYHSAGATGTGVFTEAK
17	1::sw|O05252|YUFN_BACSU	Uncharacterized lipoprotein YufN OS=Bacillus subtilis (strain 168) GN=yufN PE=3 SV=2	3027	38395	58.95	NTNFAIIDAVVDKDNVASITFK
17	1::sw|O05252|YUFN_BACSU	Uncharacterized lipoprotein YufN OS=Bacillus subtilis (strain 168) GN=yufN PE=3 SV=2	3027	38395	40.67	NTNFAIIDAVVDKDNVASITFK
17	1::sw|O05252|YUFN_BACSU	Uncharacterized lipoprotein YufN OS=Bacillus subtilis (strain 168) GN=yufN PE=3 SV=2	3027	38395	44.55	ENFDLIYGVGYLMEDSISEIADQR
126	1::sw|O05253|YUFO_BACSU	Uncharacterized ABC transporter ATP-binding protein YufO OS=Bacillus subtilis (strain 168) GN=yufO PE=3 SV=1	752	56322	39.25	ELMQIMK
126	1::sw|O05253|YUFO_BACSU	Uncharacterized ABC transporter ATP-binding protein YufO OS=Bacillus subtilis (strain 168) GN=yufO PE=3 SV=1	752	56322	45.54	ELMQIMK
126	1::sw|O05253|YUFO_BACSU	Uncharacterized ABC transporter ATP-binding protein YufO OS=Bacillus subtilis (strain 168) GN=yufO PE=3 SV=1	752	56322	41.58	IAVIFEGR
126	1::sw|O05253|YUFO_BACSU	Uncharacterized ABC transporter ATP-binding protein YufO OS=Bacillus subtilis (strain 168) GN=yufO PE=3 SV=1	752	56322	29.14	ELMQIMK	Oxidation (M)
126	1::sw|O05253|YUFO_BACSU	Uncharacterized ABC transporter ATP-binding protein YufO OS=Bacillus subtilis (strain 168) GN=yufO PE=3 SV=1	752	56322	22.97	QIQNLTPR
126	1::sw|O05253|YUFO_BACSU	Uncharacterized ABC transporter ATP-binding protein YufO OS=Bacillus subtilis (strain 168) GN=yufO PE=3 SV=1	752	56322	31.96	TPDEYTHAR
126	1::sw|O05253|YUFO_BACSU	Uncharacterized ABC transporter ATP-binding protein YufO OS=Bacillus subtilis (strain 168) GN=yufO PE=3 SV=1	752	56322	40.51	TPDEYTHAR
126	1::sw|O05253|YUFO_BACSU	Uncharacterized ABC transporter ATP-binding protein YufO OS=Bacillus subtilis (strain 168) GN=yufO PE=3 SV=1	752	56322	24.65	TPDEYTHAR
126	1::sw|O05253|YUFO_BACSU	Uncharacterized ABC transporter ATP-binding protein YufO OS=Bacillus subtilis (strain 168) GN=yufO PE=3 SV=1	752	56322	21.21	SLITEYDVR
126	1::sw|O05253|YUFO_BACSU	Uncharacterized ABC transporter ATP-binding protein YufO OS=Bacillus subtilis (strain 168) GN=yufO PE=3 SV=1	752	56322	42.59	SLITEYDVR
126	1::sw|O05253|YUFO_BACSU	Uncharacterized ABC transporter ATP-binding protein YufO OS=Bacillus subtilis (strain 168) GN=yufO PE=3 SV=1	752	56322	27.47	YGLQIHPEAK
126	1::sw|O05253|YUFO_BACSU	Uncharacterized ABC transporter ATP-binding protein YufO OS=Bacillus subtilis (strain 168) GN=yufO PE=3 SV=1	752	56322	30.23	AADISVGMQQR
126	1::sw|O05253|YUFO_BACSU	Uncharacterized ABC transporter ATP-binding protein YufO OS=Bacillus subtilis (strain 168) GN=yufO PE=3 SV=1	752	56322	42.34	AADISVGMQQR
126	1::sw|O05253|YUFO_BACSU	Uncharacterized ABC transporter ATP-binding protein YufO OS=Bacillus subtilis (strain 168) GN=yufO PE=3 SV=1	752	56322	25.9	AADISVGMQQR
126	1::sw|O05253|YUFO_BACSU	Uncharacterized ABC transporter ATP-binding protein YufO OS=Bacillus subtilis (strain 168) GN=yufO PE=3 SV=1	752	56322	48.87	KPYSALGVLHK
126	1::sw|O05253|YUFO_BACSU	Uncharacterized ABC transporter ATP-binding protein YufO OS=Bacillus subtilis (strain 168) GN=yufO PE=3 SV=1	752	56322	48.03	KPYSALGVLHK
126	1::sw|O05253|YUFO_BACSU	Uncharacterized ABC transporter ATP-binding protein YufO OS=Bacillus subtilis (strain 168) GN=yufO PE=3 SV=1	752	56322	80.73	AGQEVQDISDR
126	1::sw|O05253|YUFO_BACSU	Uncharacterized ABC transporter ATP-binding protein YufO OS=Bacillus subtilis (strain 168) GN=yufO PE=3 SV=1	752	56322	59.21	AGQEVQDISDR
126	1::sw|O05253|YUFO_BACSU	Uncharacterized ABC transporter ATP-binding protein YufO OS=Bacillus subtilis (strain 168) GN=yufO PE=3 SV=1	752	56322	53.41	AGQEVQDISDR
126	1::sw|O05253|YUFO_BACSU	Uncharacterized ABC transporter ATP-binding protein YufO OS=Bacillus subtilis (strain 168) GN=yufO PE=3 SV=1	752	56322	39.74	GLDVGAIEFVHK
126	1::sw|O05253|YUFO_BACSU	Uncharacterized ABC transporter ATP-binding protein YufO OS=Bacillus subtilis (strain 168) GN=yufO PE=3 SV=1	752	56322	52.75	GLDVGAIEFVHK
126	1::sw|O05253|YUFO_BACSU	Uncharacterized ABC transporter ATP-binding protein YufO OS=Bacillus subtilis (strain 168) GN=yufO PE=3 SV=1	752	56322	40	LKEIMEICDR
126	1::sw|O05253|YUFO_BACSU	Uncharacterized ABC transporter ATP-binding protein YufO OS=Bacillus subtilis (strain 168) GN=yufO PE=3 SV=1	752	56322	18.37	RAGQEVQDISDR
126	1::sw|O05253|YUFO_BACSU	Uncharacterized ABC transporter ATP-binding protein YufO OS=Bacillus subtilis (strain 168) GN=yufO PE=3 SV=1	752	56322	77.73	MEYVIEMLNIR
126	1::sw|O05253|YUFO_BACSU	Uncharacterized ABC transporter ATP-binding protein YufO OS=Bacillus subtilis (strain 168) GN=yufO PE=3 SV=1	752	56322	57.87	MEYVIEMLNIR
126	1::sw|O05253|YUFO_BACSU	Uncharacterized ABC transporter ATP-binding protein YufO OS=Bacillus subtilis (strain 168) GN=yufO PE=3 SV=1	752	56322	32.37	ITESGIGHIPQDR
126	1::sw|O05253|YUFO_BACSU	Uncharacterized ABC transporter ATP-binding protein YufO OS=Bacillus subtilis (strain 168) GN=yufO PE=3 SV=1	752	56322	19.42	ITESGIGHIPQDR
126	1::sw|O05253|YUFO_BACSU	Uncharacterized ABC transporter ATP-binding protein YufO OS=Bacillus subtilis (strain 168) GN=yufO PE=3 SV=1	752	56322	83.16	DTNQDELASLMVGR
126	1::sw|O05253|YUFO_BACSU	Uncharacterized ABC transporter ATP-binding protein YufO OS=Bacillus subtilis (strain 168) GN=yufO PE=3 SV=1	752	56322	58.52	AAQPGAEVLAIDGITVK
126	1::sw|O05253|YUFO_BACSU	Uncharacterized ABC transporter ATP-binding protein YufO OS=Bacillus subtilis (strain 168) GN=yufO PE=3 SV=1	752	56322	37.88	STLMNVLFGLYQPER
126	1::sw|O05253|YUFO_BACSU	Uncharacterized ABC transporter ATP-binding protein YufO OS=Bacillus subtilis (strain 168) GN=yufO PE=3 SV=1	752	56322	38.93	EIDRNPDLLIAAQPTR
126	1::sw|O05253|YUFO_BACSU	Uncharacterized ABC transporter ATP-binding protein YufO OS=Bacillus subtilis (strain 168) GN=yufO PE=3 SV=1	752	56322	39.22	GADILIFDEPTAVLTPHEIK
126	1::sw|O05253|YUFO_BACSU	Uncharacterized ABC transporter ATP-binding protein YufO OS=Bacillus subtilis (strain 168) GN=yufO PE=3 SV=1	752	56322	29.19	GADILIFDEPTAVLTPHEIK
126	1::sw|O05253|YUFO_BACSU	Uncharacterized ABC transporter ATP-binding protein YufO OS=Bacillus subtilis (strain 168) GN=yufO PE=3 SV=1	752	56322	51.13	HGLVLDFPIGENILLQSYYK
439	1::sw|O05254|YUFP_BACSU	Uncharacterized ABC transporter permease protein YufP OS=Bacillus subtilis (strain 168) GN=yufP PE=3 SV=1	166	36877	24.67	IHESASLR
439	1::sw|O05254|YUFP_BACSU	Uncharacterized ABC transporter permease protein YufP OS=Bacillus subtilis (strain 168) GN=yufP PE=3 SV=1	166	36877	39.84	IHESASLR
439	1::sw|O05254|YUFP_BACSU	Uncharacterized ABC transporter permease protein YufP OS=Bacillus subtilis (strain 168) GN=yufP PE=3 SV=1	166	36877	31.08	IHESASLR
439	1::sw|O05254|YUFP_BACSU	Uncharacterized ABC transporter permease protein YufP OS=Bacillus subtilis (strain 168) GN=yufP PE=3 SV=1	166	36877	18.56	IHESASLR
439	1::sw|O05254|YUFP_BACSU	Uncharacterized ABC transporter permease protein YufP OS=Bacillus subtilis (strain 168) GN=yufP PE=3 SV=1	166	36877	77.16	SPFLEQITDYSR
439	1::sw|O05254|YUFP_BACSU	Uncharacterized ABC transporter permease protein YufP OS=Bacillus subtilis (strain 168) GN=yufP PE=3 SV=1	166	36877	73.93	SPFLEQITDYSR
487	1::sw|O05255|YUFQ_BACSU	Uncharacterized ABC transporter permease protein YufQ OS=Bacillus subtilis (strain 168) GN=yufQ PE=3 SV=1	148	33716	62.97	IPGLGDIPVLGK
487	1::sw|O05255|YUFQ_BACSU	Uncharacterized ABC transporter permease protein YufQ OS=Bacillus subtilis (strain 168) GN=yufQ PE=3 SV=1	148	33716	69.66	IPGLGDIPVLGK
487	1::sw|O05255|YUFQ_BACSU	Uncharacterized ABC transporter permease protein YufQ OS=Bacillus subtilis (strain 168) GN=yufQ PE=3 SV=1	148	33716	60.01	IPGLGDIPVLGK
487	1::sw|O05255|YUFQ_BACSU	Uncharacterized ABC transporter permease protein YufQ OS=Bacillus subtilis (strain 168) GN=yufQ PE=3 SV=1	148	33716	18.14	TKIPGLGDIPVLGK
1047	1::sw|O05256|MAEN_BACSU	Na(+)-malate symporter OS=Bacillus subtilis (strain 168) GN=maeN PE=3 SV=1	26	48192	26.4	TGTISPEQK
868	1::sw|O05260|MRPC_BACSU	Na(+)/H(+) antiporter subunit C OS=Bacillus subtilis (strain 168) GN=mrpC PE=1 SV=2	48	12277	48.06	GAAPILSEHAK
1026	1::sw|O05267|YUMB_BACSU	NADH dehydrogenase-like protein YumB OS=Bacillus subtilis (strain 168) GN=yumB PE=3 SV=1	29	45133	28.67	KDEEPEQIK
1026	1::sw|O05267|YUMB_BACSU	NADH dehydrogenase-like protein YumB OS=Bacillus subtilis (strain 168) GN=yumB PE=3 SV=1	29	45133	19.16	EYAFPIANINTSR
776	1::sw|O05268|FENR2_BACSU	Ferredoxin--NADP reductase 2 OS=Bacillus subtilis (strain 168) GN=yumC PE=1 SV=2	63	36932	31.34	AQELINNLK
776	1::sw|O05268|FENR2_BACSU	Ferredoxin--NADP reductase 2 OS=Bacillus subtilis (strain 168) GN=yumC PE=1 SV=2	63	36932	30.77	LVTNEETHYSK
776	1::sw|O05268|FENR2_BACSU	Ferredoxin--NADP reductase 2 OS=Bacillus subtilis (strain 168) GN=yumC PE=1 SV=2	63	36932	35.95	NLHYFVDDLQK
736	1::sw|O05390|CSBX_BACSU	Alpha-ketoglutarate permease OS=Bacillus subtilis (strain 168) GN=csbX PE=1 SV=3	71	48057	48.69	AFTIMFENPK
736	1::sw|O05390|CSBX_BACSU	Alpha-ketoglutarate permease OS=Bacillus subtilis (strain 168) GN=csbX PE=1 SV=3	71	48057	39.34	AFTIMFENPK
881	1::sw|O05392|RUVA_BACSU	Holliday junction ATP-dependent DNA helicase RuvA OS=Bacillus subtilis (strain 168) GN=ruvA PE=3 SV=2	47	22570	37.73	EDAFSLYGFSTR
881	1::sw|O05392|RUVA_BACSU	Holliday junction ATP-dependent DNA helicase RuvA OS=Bacillus subtilis (strain 168) GN=ruvA PE=3 SV=2	47	22570	28.4	EEIGLTTDQYVK
1044	1::sw|O05406|YRHP_BACSU	Uncharacterized membrane protein YrhP OS=Bacillus subtilis (strain 168) GN=yrhP PE=3 SV=2	27	23374	27.05	ITGIILVGFGIK
170	1::sw|O05503|YDHK_BACSU	Uncharacterized protein YdhK OS=Bacillus subtilis (strain 168) GN=ydhK PE=1 SV=1	546	22579	27.49	WVIQEEIK
170	1::sw|O05503|YDHK_BACSU	Uncharacterized protein YdhK OS=Bacillus subtilis (strain 168) GN=ydhK PE=1 SV=1	546	22579	38.77	WVIQEEIK
170	1::sw|O05503|YDHK_BACSU	Uncharacterized protein YdhK OS=Bacillus subtilis (strain 168) GN=ydhK PE=1 SV=1	546	22579	21.77	GATAEIDSAEK
170	1::sw|O05503|YDHK_BACSU	Uncharacterized protein YdhK OS=Bacillus subtilis (strain 168) GN=ydhK PE=1 SV=1	546	22579	58.47	GATAEIDSAEK
170	1::sw|O05503|YDHK_BACSU	Uncharacterized protein YdhK OS=Bacillus subtilis (strain 168) GN=ydhK PE=1 SV=1	546	22579	54.65	GATAEIDSAEK
170	1::sw|O05503|YDHK_BACSU	Uncharacterized protein YdhK OS=Bacillus subtilis (strain 168) GN=ydhK PE=1 SV=1	546	22579	53.16	GATAEIDSAEK
170	1::sw|O05503|YDHK_BACSU	Uncharacterized protein YdhK OS=Bacillus subtilis (strain 168) GN=ydhK PE=1 SV=1	546	22579	31.76	WVTEDELSAK
170	1::sw|O05503|YDHK_BACSU	Uncharacterized protein YdhK OS=Bacillus subtilis (strain 168) GN=ydhK PE=1 SV=1	546	22579	44.22	WVTEDELSAK
170	1::sw|O05503|YDHK_BACSU	Uncharacterized protein YdhK OS=Bacillus subtilis (strain 168) GN=ydhK PE=1 SV=1	546	22579	35.12	WVTEDELSAK
170	1::sw|O05503|YDHK_BACSU	Uncharacterized protein YdhK OS=Bacillus subtilis (strain 168) GN=ydhK PE=1 SV=1	546	22579	59.94	VGSQVIINTSHMK
170	1::sw|O05503|YDHK_BACSU	Uncharacterized protein YdhK OS=Bacillus subtilis (strain 168) GN=ydhK PE=1 SV=1	546	22579	63.08	VGSQVIINTSHMK
170	1::sw|O05503|YDHK_BACSU	Uncharacterized protein YdhK OS=Bacillus subtilis (strain 168) GN=ydhK PE=1 SV=1	546	22579	64.5	VGSQVIINTSHMK
170	1::sw|O05503|YDHK_BACSU	Uncharacterized protein YdhK OS=Bacillus subtilis (strain 168) GN=ydhK PE=1 SV=1	546	22579	27.86	VGSQVIINTSHMK
170	1::sw|O05503|YDHK_BACSU	Uncharacterized protein YdhK OS=Bacillus subtilis (strain 168) GN=ydhK PE=1 SV=1	546	22579	37.75	VGSQVIINTSHMK	Oxidation (M)
170	1::sw|O05503|YDHK_BACSU	Uncharacterized protein YdhK OS=Bacillus subtilis (strain 168) GN=ydhK PE=1 SV=1	546	22579	42.85	VGSQVIINTSHMK	Oxidation (M)
170	1::sw|O05503|YDHK_BACSU	Uncharacterized protein YdhK OS=Bacillus subtilis (strain 168) GN=ydhK PE=1 SV=1	546	22579	62.27	WVIQEEIKDAGDK
170	1::sw|O05503|YDHK_BACSU	Uncharacterized protein YdhK OS=Bacillus subtilis (strain 168) GN=ydhK PE=1 SV=1	546	22579	25.03	WVIQEEIKDAGDK
170	1::sw|O05503|YDHK_BACSU	Uncharacterized protein YdhK OS=Bacillus subtilis (strain 168) GN=ydhK PE=1 SV=1	546	22579	70.23	TLQPGDQVILEASHMK
170	1::sw|O05503|YDHK_BACSU	Uncharacterized protein YdhK OS=Bacillus subtilis (strain 168) GN=ydhK PE=1 SV=1	546	22579	93.15	TTVYMVDYTSTTSGEK
782	1::sw|O05509|GMUR_BACSU	HTH-type transcriptional regulator GmuR OS=Bacillus subtilis (strain 168) GN=gmuR PE=1 SV=1	62	27471	61.9	ALDNLVAEGLLFR
922	1::sw|O05518|TSAD_BACSU	tRNA N6-adenosine threonylcarbamoyltransferase OS=Bacillus subtilis (strain 168) GN=tsaD PE=1 SV=1	41	36933	26.24	QVLLAGGVAANR
922	1::sw|O05518|TSAD_BACSU	tRNA N6-adenosine threonylcarbamoyltransferase OS=Bacillus subtilis (strain 168) GN=tsaD PE=1 SV=1	41	36933	33.59	SAVINTLHNASQK
1082	1::sw|O05522|TATAY_BACSU	Sec-independent protein translocase protein TatAy OS=Bacillus subtilis (strain 168) GN=tatAy PE=1 SV=1	24	6061	23.53	GLTSDEEEK
847	1::sw|O05523|TATCY_BACSU	Sec-independent protein translocase protein TatCy OS=Bacillus subtilis (strain 168) GN=tatC2 PE=1 SV=1	51	29037	51.02	SSAADRDVSSGQ
944	1::sw|O05525|YDIL_BACSU	Putative membrane peptidase YdiL OS=Bacillus subtilis (strain 168) GN=ydiL PE=3 SV=1	39	27629	38.79	IIFGALYEK
1106	1::sw|O06473|YFMO_BACSU	Multidrug efflux protein YfmO OS=Bacillus subtilis (strain 168) GN=yfmO PE=2 SV=1	20	41537	21.63	VGVFDAMK
1106	1::sw|O06473|YFMO_BACSU	Multidrug efflux protein YfmO OS=Bacillus subtilis (strain 168) GN=yfmO PE=2 SV=1	20	41537	21.69	VGVFDAMK
1106	1::sw|O06473|YFMO_BACSU	Multidrug efflux protein YfmO OS=Bacillus subtilis (strain 168) GN=yfmO PE=2 SV=1	20	41537	20.04	SIASSAYSSVR
1075	1::sw|O06475|YFMQ_BACSU	Uncharacterized protein YfmQ OS=Bacillus subtilis (strain 168) GN=yfmQ PE=4 SV=1	24	16912	24.16	VIDQFNEAIFLEK
983	1::sw|O06476|YFMR_BACSU	Uncharacterized ABC transporter ATP-binding protein YfmR OS=Bacillus subtilis (strain 168) GN=yfmR PE=3 SV=1	34	71077	18.47	AEREAQAEQK
983	1::sw|O06476|YFMR_BACSU	Uncharacterized ABC transporter ATP-binding protein YfmR OS=Bacillus subtilis (strain 168) GN=yfmR PE=3 SV=1	34	71077	33.95	TAEELEAAMDR
413	1::sw|O06477|YFMS_BACSU	Putative sensory transducer protein YfmS OS=Bacillus subtilis (strain 168) GN=yfmS PE=2 SV=1	183	30306	33.23	LLVNIPAK
413	1::sw|O06477|YFMS_BACSU	Putative sensory transducer protein YfmS OS=Bacillus subtilis (strain 168) GN=yfmS PE=2 SV=1	183	30306	31.17	GFSVVADEIR
413	1::sw|O06477|YFMS_BACSU	Putative sensory transducer protein YfmS OS=Bacillus subtilis (strain 168) GN=yfmS PE=2 SV=1	183	30306	37.62	GFSVVADEIR
413	1::sw|O06477|YFMS_BACSU	Putative sensory transducer protein YfmS OS=Bacillus subtilis (strain 168) GN=yfmS PE=2 SV=1	183	30306	31.63	GFSVVADEIR
413	1::sw|O06477|YFMS_BACSU	Putative sensory transducer protein YfmS OS=Bacillus subtilis (strain 168) GN=yfmS PE=2 SV=1	183	30306	44.71	ELFGFPLIAR
413	1::sw|O06477|YFMS_BACSU	Putative sensory transducer protein YfmS OS=Bacillus subtilis (strain 168) GN=yfmS PE=2 SV=1	183	30306	31.44	ELFGFPLIAR
413	1::sw|O06477|YFMS_BACSU	Putative sensory transducer protein YfmS OS=Bacillus subtilis (strain 168) GN=yfmS PE=2 SV=1	183	30306	18.42	GFSVVADEIRK
413	1::sw|O06477|YFMS_BACSU	Putative sensory transducer protein YfmS OS=Bacillus subtilis (strain 168) GN=yfmS PE=2 SV=1	183	30306	29.6	GFSVVADEIRK
413	1::sw|O06477|YFMS_BACSU	Putative sensory transducer protein YfmS OS=Bacillus subtilis (strain 168) GN=yfmS PE=2 SV=1	183	30306	29.95	GFSVVADEIRK
413	1::sw|O06477|YFMS_BACSU	Putative sensory transducer protein YfmS OS=Bacillus subtilis (strain 168) GN=yfmS PE=2 SV=1	183	30306	45.85	ETADILDAFIK
413	1::sw|O06477|YFMS_BACSU	Putative sensory transducer protein YfmS OS=Bacillus subtilis (strain 168) GN=yfmS PE=2 SV=1	183	30306	56.54	ENVGQIDQITK
260	1::sw|O06478|ALDH5_BACSU	Putative aldehyde dehydrogenase YfmT OS=Bacillus subtilis (strain 168) GN=yfmT PE=2 SV=1	341	53402	28.79	EAATFPIR
260	1::sw|O06478|ALDH5_BACSU	Putative aldehyde dehydrogenase YfmT OS=Bacillus subtilis (strain 168) GN=yfmT PE=2 SV=1	341	53402	63.37	AAFEIGLVK
260	1::sw|O06478|ALDH5_BACSU	Putative aldehyde dehydrogenase YfmT OS=Bacillus subtilis (strain 168) GN=yfmT PE=2 SV=1	341	53402	29.8	FLELYQAK
260	1::sw|O06478|ALDH5_BACSU	Putative aldehyde dehydrogenase YfmT OS=Bacillus subtilis (strain 168) GN=yfmT PE=2 SV=1	341	53402	18.25	WISVQHEK
260	1::sw|O06478|ALDH5_BACSU	Putative aldehyde dehydrogenase YfmT OS=Bacillus subtilis (strain 168) GN=yfmT PE=2 SV=1	341	53402	20.86	WDAVNPFEK
260	1::sw|O06478|ALDH5_BACSU	Putative aldehyde dehydrogenase YfmT OS=Bacillus subtilis (strain 168) GN=yfmT PE=2 SV=1	341	53402	44.71	VLVHSSIYDK
260	1::sw|O06478|ALDH5_BACSU	Putative aldehyde dehydrogenase YfmT OS=Bacillus subtilis (strain 168) GN=yfmT PE=2 SV=1	341	53402	40.49	VLVHSSIYDK
260	1::sw|O06478|ALDH5_BACSU	Putative aldehyde dehydrogenase YfmT OS=Bacillus subtilis (strain 168) GN=yfmT PE=2 SV=1	341	53402	57.49	VGSYIGQLAMK
260	1::sw|O06478|ALDH5_BACSU	Putative aldehyde dehydrogenase YfmT OS=Bacillus subtilis (strain 168) GN=yfmT PE=2 SV=1	341	53402	23.17	VGSYIGQLAMK	Oxidation (M)
260	1::sw|O06478|ALDH5_BACSU	Putative aldehyde dehydrogenase YfmT OS=Bacillus subtilis (strain 168) GN=yfmT PE=2 SV=1	341	53402	35.55	MFQYEELNK
260	1::sw|O06478|ALDH5_BACSU	Putative aldehyde dehydrogenase YfmT OS=Bacillus subtilis (strain 168) GN=yfmT PE=2 SV=1	341	53402	45.27	ATADDVDEAYR
260	1::sw|O06478|ALDH5_BACSU	Putative aldehyde dehydrogenase YfmT OS=Bacillus subtilis (strain 168) GN=yfmT PE=2 SV=1	341	53402	67.11	KATADDVDEAYR
260	1::sw|O06478|ALDH5_BACSU	Putative aldehyde dehydrogenase YfmT OS=Bacillus subtilis (strain 168) GN=yfmT PE=2 SV=1	341	53402	50.7	EELFGPVVSFMK
260	1::sw|O06478|ALDH5_BACSU	Putative aldehyde dehydrogenase YfmT OS=Bacillus subtilis (strain 168) GN=yfmT PE=2 SV=1	341	53402	43.31	WQEGSSPNVLENK
260	1::sw|O06478|ALDH5_BACSU	Putative aldehyde dehydrogenase YfmT OS=Bacillus subtilis (strain 168) GN=yfmT PE=2 SV=1	341	53402	46.17	LGGFNGTIVEPTILK
998	1::sw|O06481|YFNC_BACSU	Uncharacterized MFS-type transporter YfnC OS=Bacillus subtilis (strain 168) GN=yfnC PE=3 SV=1	32	43688	25.66	TAENTAITK
998	1::sw|O06481|YFNC_BACSU	Uncharacterized MFS-type transporter YfnC OS=Bacillus subtilis (strain 168) GN=yfnC PE=3 SV=1	32	43688	29.22	TAENTAITK
494	1::sw|O06491|GATA_BACSU	Glutamyl-tRNA(Gln) amidotransferase subunit A OS=Bacillus subtilis (strain 168) GN=gatA PE=3 SV=3	144	52802	18.26	EYLGEGVGK
494	1::sw|O06491|GATA_BACSU	Glutamyl-tRNA(Gln) amidotransferase subunit A OS=Bacillus subtilis (strain 168) GN=gatA PE=3 SV=3	144	52802	49.26	LQDAEAVTIGK
494	1::sw|O06491|GATA_BACSU	Glutamyl-tRNA(Gln) amidotransferase subunit A OS=Bacillus subtilis (strain 168) GN=gatA PE=3 SV=3	144	52802	48.47	LQDAEAVTIGK
494	1::sw|O06491|GATA_BACSU	Glutamyl-tRNA(Gln) amidotransferase subunit A OS=Bacillus subtilis (strain 168) GN=gatA PE=3 SV=3	144	52802	23.79	YDVIVGPTTPTPAFK
494	1::sw|O06491|GATA_BACSU	Glutamyl-tRNA(Gln) amidotransferase subunit A OS=Bacillus subtilis (strain 168) GN=gatA PE=3 SV=3	144	52802	87.88	TVEDNAFLLQAISGVDK
1005	1::sw|O06493|OPUE_BACSU	Osmoregulated proline transporter OS=Bacillus subtilis (strain 168) GN=opuE PE=3 SV=1	31	53248	28.51	LFGVMEK
1005	1::sw|O06493|OPUE_BACSU	Osmoregulated proline transporter OS=Bacillus subtilis (strain 168) GN=opuE PE=3 SV=1	31	53248	24.41	LFESAFGADYK
440	1::sw|O06714|SBCC_BACSU	Nuclease SbcCD subunit C OS=Bacillus subtilis (strain 168) GN=sbcC PE=3 SV=3	165	129240	22.4	QDILSVK
440	1::sw|O06714|SBCC_BACSU	Nuclease SbcCD subunit C OS=Bacillus subtilis (strain 168) GN=sbcC PE=3 SV=3	165	129240	21.34	QDILSVK
440	1::sw|O06714|SBCC_BACSU	Nuclease SbcCD subunit C OS=Bacillus subtilis (strain 168) GN=sbcC PE=3 SV=3	165	129240	30.97	QDILSVK
440	1::sw|O06714|SBCC_BACSU	Nuclease SbcCD subunit C OS=Bacillus subtilis (strain 168) GN=sbcC PE=3 SV=3	165	129240	21.47	QDILSVK
440	1::sw|O06714|SBCC_BACSU	Nuclease SbcCD subunit C OS=Bacillus subtilis (strain 168) GN=sbcC PE=3 SV=3	165	129240	20.72	QDILSVK
440	1::sw|O06714|SBCC_BACSU	Nuclease SbcCD subunit C OS=Bacillus subtilis (strain 168) GN=sbcC PE=3 SV=3	165	129240	18.78	AVVLPQGK
440	1::sw|O06714|SBCC_BACSU	Nuclease SbcCD subunit C OS=Bacillus subtilis (strain 168) GN=sbcC PE=3 SV=3	165	129240	45.38	VAEILAGR
440	1::sw|O06714|SBCC_BACSU	Nuclease SbcCD subunit C OS=Bacillus subtilis (strain 168) GN=sbcC PE=3 SV=3	165	129240	23.78	TGIDQFMDK
440	1::sw|O06714|SBCC_BACSU	Nuclease SbcCD subunit C OS=Bacillus subtilis (strain 168) GN=sbcC PE=3 SV=3	165	129240	24.35	IMLEEQSAR
440	1::sw|O06714|SBCC_BACSU	Nuclease SbcCD subunit C OS=Bacillus subtilis (strain 168) GN=sbcC PE=3 SV=3	165	129240	32.14	STYEEEEKR
440	1::sw|O06714|SBCC_BACSU	Nuclease SbcCD subunit C OS=Bacillus subtilis (strain 168) GN=sbcC PE=3 SV=3	165	129240	30.84	FNEIEAELKK
440	1::sw|O06714|SBCC_BACSU	Nuclease SbcCD subunit C OS=Bacillus subtilis (strain 168) GN=sbcC PE=3 SV=3	165	129240	24.65	LFNLEQYGDR
440	1::sw|O06714|SBCC_BACSU	Nuclease SbcCD subunit C OS=Bacillus subtilis (strain 168) GN=sbcC PE=3 SV=3	165	129240	53.6	SCQQAAEMALR
440	1::sw|O06714|SBCC_BACSU	Nuclease SbcCD subunit C OS=Bacillus subtilis (strain 168) GN=sbcC PE=3 SV=3	165	129240	31.31	KLIVHPAEPSGR
440	1::sw|O06714|SBCC_BACSU	Nuclease SbcCD subunit C OS=Bacillus subtilis (strain 168) GN=sbcC PE=3 SV=3	165	129240	37.59	SIAFLAEHEAQK
1055	1::sw|O06724|YISK_BACSU	Uncharacterized protein YisK OS=Bacillus subtilis (strain 168) GN=yisK PE=2 SV=1	26	33296	25.85	QLAEWAK
1055	1::sw|O06724|YISK_BACSU	Uncharacterized protein YisK OS=Bacillus subtilis (strain 168) GN=yisK PE=2 SV=1	26	33296	19.3	SSIQEPER
570	1::sw|O06725|YISL_BACSU	UPF0344 protein YisL OS=Bacillus subtilis (strain 168) GN=yisL PE=3 SV=1	116	13213	42.55	FANWNGEYAGK
570	1::sw|O06725|YISL_BACSU	UPF0344 protein YisL OS=Bacillus subtilis (strain 168) GN=yisL PE=3 SV=1	116	13213	56.42	FANWNGEYAGK
570	1::sw|O06725|YISL_BACSU	UPF0344 protein YisL OS=Bacillus subtilis (strain 168) GN=yisL PE=3 SV=1	116	13213	55.96	FANWNGEYAGK
935	1::sw|O06745|YITJ_BACSU	Bifunctional homocysteine S-methyltransferase/5,10-methylenetetrahydrofolate reductase OS=Bacillus subtilis (strain 168) GN=yitJ PE=2 SV=1	40	68341	39.51	NAYSLDEIKR
769	1::sw|O06746|YITK_BACSU	UPF0234 protein yitk OS=Bacillus subtilis (strain 168) GN=yitK PE=3 SV=1	64	18191	62.18	VENASGGTVR
769	1::sw|O06746|YITK_BACSU	UPF0234 protein yitk OS=Bacillus subtilis (strain 168) GN=yitK PE=3 SV=1	64	18191	22.27	LVQGIDKDNAK
912	1::sw|O06752|YITQ_BACSU	Uncharacterized protein YitQ OS=Bacillus subtilis (strain 168) GN=yitQ PE=4 SV=2	43	22039	25.57	GHITAFVQDR
912	1::sw|O06752|YITQ_BACSU	Uncharacterized protein YitQ OS=Bacillus subtilis (strain 168) GN=yitQ PE=4 SV=2	43	22039	37.89	GHITAFVQDR
984	1::sw|O06753|YITR_BACSU	Uncharacterized protein YitR OS=Bacillus subtilis (strain 168) GN=yitR PE=4 SV=1	34	11056	33.82	QTWMLAGFNEAR
466	1::sw|O06965|YVCA_BACSU	Putative lipoprotein YvcA OS=Bacillus subtilis (strain 168) GN=yvcA PE=2 SV=2	155	28082	18.95	PKDMDPK
466	1::sw|O06965|YVCA_BACSU	Putative lipoprotein YvcA OS=Bacillus subtilis (strain 168) GN=yvcA PE=2 SV=2	155	28082	28.61	MLFPEDGK
466	1::sw|O06965|YVCA_BACSU	Putative lipoprotein YvcA OS=Bacillus subtilis (strain 168) GN=yvcA PE=2 SV=2	155	28082	28.27	TMLDIVSGK
466	1::sw|O06965|YVCA_BACSU	Putative lipoprotein YvcA OS=Bacillus subtilis (strain 168) GN=yvcA PE=2 SV=2	155	28082	25.9	NDYKGEYK
466	1::sw|O06965|YVCA_BACSU	Putative lipoprotein YvcA OS=Bacillus subtilis (strain 168) GN=yvcA PE=2 SV=2	155	28082	22.38	DIFDDIDRK
466	1::sw|O06965|YVCA_BACSU	Putative lipoprotein YvcA OS=Bacillus subtilis (strain 168) GN=yvcA PE=2 SV=2	155	28082	44.81	LINSITFLIDK
466	1::sw|O06965|YVCA_BACSU	Putative lipoprotein YvcA OS=Bacillus subtilis (strain 168) GN=yvcA PE=2 SV=2	155	28082	22.98	LINSITFLIDKK
466	1::sw|O06965|YVCA_BACSU	Putative lipoprotein YvcA OS=Bacillus subtilis (strain 168) GN=yvcA PE=2 SV=2	155	28082	50.47	EEEPGYYLLESK
466	1::sw|O06965|YVCA_BACSU	Putative lipoprotein YvcA OS=Bacillus subtilis (strain 168) GN=yvcA PE=2 SV=2	155	28082	70.41	YNYSYSYFGYVK
139	1::sw|O06967|BMRA_BACSU	Multidrug resistance ABC transporter ATP-binding/permease protein BmrA OS=Bacillus subtilis (strain 168) GN=bmrA PE=1 SV=1	686	64535	39.87	MGISSLFK
139	1::sw|O06967|BMRA_BACSU	Multidrug resistance ABC transporter ATP-binding/permease protein BmrA OS=Bacillus subtilis (strain 168) GN=bmrA PE=1 SV=1	686	64535	43.13	TTIVIAHR
139	1::sw|O06967|BMRA_BACSU	Multidrug resistance ABC transporter ATP-binding/permease protein BmrA OS=Bacillus subtilis (strain 168) GN=bmrA PE=1 SV=1	686	64535	39.64	TTIVIAHR
139	1::sw|O06967|BMRA_BACSU	Multidrug resistance ABC transporter ATP-binding/permease protein BmrA OS=Bacillus subtilis (strain 168) GN=bmrA PE=1 SV=1	686	64535	37.87	TTIVIAHR
139	1::sw|O06967|BMRA_BACSU	Multidrug resistance ABC transporter ATP-binding/permease protein BmrA OS=Bacillus subtilis (strain 168) GN=bmrA PE=1 SV=1	686	64535	48.54	TTIVIAHR
139	1::sw|O06967|BMRA_BACSU	Multidrug resistance ABC transporter ATP-binding/permease protein BmrA OS=Bacillus subtilis (strain 168) GN=bmrA PE=1 SV=1	686	64535	44.85	TTIVIAHR
139	1::sw|O06967|BMRA_BACSU	Multidrug resistance ABC transporter ATP-binding/permease protein BmrA OS=Bacillus subtilis (strain 168) GN=bmrA PE=1 SV=1	686	64535	47.8	GIMLSGGQR
139	1::sw|O06967|BMRA_BACSU	Multidrug resistance ABC transporter ATP-binding/permease protein BmrA OS=Bacillus subtilis (strain 168) GN=bmrA PE=1 SV=1	686	64535	33.48	GIMLSGGQR
139	1::sw|O06967|BMRA_BACSU	Multidrug resistance ABC transporter ATP-binding/permease protein BmrA OS=Bacillus subtilis (strain 168) GN=bmrA PE=1 SV=1	686	64535	19.65	MNADLENK
139	1::sw|O06967|BMRA_BACSU	Multidrug resistance ABC transporter ATP-binding/permease protein BmrA OS=Bacillus subtilis (strain 168) GN=bmrA PE=1 SV=1	686	64535	40.4	MNADLENK
139	1::sw|O06967|BMRA_BACSU	Multidrug resistance ABC transporter ATP-binding/permease protein BmrA OS=Bacillus subtilis (strain 168) GN=bmrA PE=1 SV=1	686	64535	22.64	DFAEQQLK
139	1::sw|O06967|BMRA_BACSU	Multidrug resistance ABC transporter ATP-binding/permease protein BmrA OS=Bacillus subtilis (strain 168) GN=bmrA PE=1 SV=1	686	64535	39.72	DFAEQQLK
139	1::sw|O06967|BMRA_BACSU	Multidrug resistance ABC transporter ATP-binding/permease protein BmrA OS=Bacillus subtilis (strain 168) GN=bmrA PE=1 SV=1	686	64535	24.23	EVSAVIEAGK
139	1::sw|O06967|BMRA_BACSU	Multidrug resistance ABC transporter ATP-binding/permease protein BmrA OS=Bacillus subtilis (strain 168) GN=bmrA PE=1 SV=1	686	64535	34.42	EVSAVIEAGK
139	1::sw|O06967|BMRA_BACSU	Multidrug resistance ABC transporter ATP-binding/permease protein BmrA OS=Bacillus subtilis (strain 168) GN=bmrA PE=1 SV=1	686	64535	36.85	EVSAVIEAGK
139	1::sw|O06967|BMRA_BACSU	Multidrug resistance ABC transporter ATP-binding/permease protein BmrA OS=Bacillus subtilis (strain 168) GN=bmrA PE=1 SV=1	686	64535	36.11	VTNDTMVVK
139	1::sw|O06967|BMRA_BACSU	Multidrug resistance ABC transporter ATP-binding/permease protein BmrA OS=Bacillus subtilis (strain 168) GN=bmrA PE=1 SV=1	686	64535	28.76	VTNDTMVVK
139	1::sw|O06967|BMRA_BACSU	Multidrug resistance ABC transporter ATP-binding/permease protein BmrA OS=Bacillus subtilis (strain 168) GN=bmrA PE=1 SV=1	686	64535	33.87	DVTDAEIEK
139	1::sw|O06967|BMRA_BACSU	Multidrug resistance ABC transporter ATP-binding/permease protein BmrA OS=Bacillus subtilis (strain 168) GN=bmrA PE=1 SV=1	686	64535	31.66	VTAIVGPSGGGK
139	1::sw|O06967|BMRA_BACSU	Multidrug resistance ABC transporter ATP-binding/permease protein BmrA OS=Bacillus subtilis (strain 168) GN=bmrA PE=1 SV=1	686	64535	36.95	VTAIVGPSGGGK
139	1::sw|O06967|BMRA_BACSU	Multidrug resistance ABC transporter ATP-binding/permease protein BmrA OS=Bacillus subtilis (strain 168) GN=bmrA PE=1 SV=1	686	64535	23.49	FYSPTAGTIR
139	1::sw|O06967|BMRA_BACSU	Multidrug resistance ABC transporter ATP-binding/permease protein BmrA OS=Bacillus subtilis (strain 168) GN=bmrA PE=1 SV=1	686	64535	26.82	ENICYGLER
139	1::sw|O06967|BMRA_BACSU	Multidrug resistance ABC transporter ATP-binding/permease protein BmrA OS=Bacillus subtilis (strain 168) GN=bmrA PE=1 SV=1	686	64535	31.02	ENICYGLER
139	1::sw|O06967|BMRA_BACSU	Multidrug resistance ABC transporter ATP-binding/permease protein BmrA OS=Bacillus subtilis (strain 168) GN=bmrA PE=1 SV=1	686	64535	28.79	ENICYGLER
139	1::sw|O06967|BMRA_BACSU	Multidrug resistance ABC transporter ATP-binding/permease protein BmrA OS=Bacillus subtilis (strain 168) GN=bmrA PE=1 SV=1	686	64535	58.82	ASNAEDVEYGR
139	1::sw|O06967|BMRA_BACSU	Multidrug resistance ABC transporter ATP-binding/permease protein BmrA OS=Bacillus subtilis (strain 168) GN=bmrA PE=1 SV=1	686	64535	55.25	AAEMAYALNFIK
139	1::sw|O06967|BMRA_BACSU	Multidrug resistance ABC transporter ATP-binding/permease protein BmrA OS=Bacillus subtilis (strain 168) GN=bmrA PE=1 SV=1	686	64535	42.37	AAEMAYALNFIK
139	1::sw|O06967|BMRA_BACSU	Multidrug resistance ABC transporter ATP-binding/permease protein BmrA OS=Bacillus subtilis (strain 168) GN=bmrA PE=1 SV=1	686	64535	43.44	AAEMAYALNFIK
139	1::sw|O06967|BMRA_BACSU	Multidrug resistance ABC transporter ATP-binding/permease protein BmrA OS=Bacillus subtilis (strain 168) GN=bmrA PE=1 SV=1	686	64535	47.6	FTGLLNQILPEIR
139	1::sw|O06967|BMRA_BACSU	Multidrug resistance ABC transporter ATP-binding/permease protein BmrA OS=Bacillus subtilis (strain 168) GN=bmrA PE=1 SV=1	686	64535	41.91	FTGLLNQILPEIR
139	1::sw|O06967|BMRA_BACSU	Multidrug resistance ABC transporter ATP-binding/permease protein BmrA OS=Bacillus subtilis (strain 168) GN=bmrA PE=1 SV=1	686	64535	61.33	FTGLLNQILPEIR
139	1::sw|O06967|BMRA_BACSU	Multidrug resistance ABC transporter ATP-binding/permease protein BmrA OS=Bacillus subtilis (strain 168) GN=bmrA PE=1 SV=1	686	64535	58.04	ELPNQFDTEVGER
139	1::sw|O06967|BMRA_BACSU	Multidrug resistance ABC transporter ATP-binding/permease protein BmrA OS=Bacillus subtilis (strain 168) GN=bmrA PE=1 SV=1	686	64535	37.72	ELPNQFDTEVGER
139	1::sw|O06967|BMRA_BACSU	Multidrug resistance ABC transporter ATP-binding/permease protein BmrA OS=Bacillus subtilis (strain 168) GN=bmrA PE=1 SV=1	686	64535	20.03	QIENAHLPIQLDR
139	1::sw|O06967|BMRA_BACSU	Multidrug resistance ABC transporter ATP-binding/permease protein BmrA OS=Bacillus subtilis (strain 168) GN=bmrA PE=1 SV=1	686	64535	55.78	LSTVVDADQLLFVEK
139	1::sw|O06967|BMRA_BACSU	Multidrug resistance ABC transporter ATP-binding/permease protein BmrA OS=Bacillus subtilis (strain 168) GN=bmrA PE=1 SV=1	686	64535	59.97	LGDEPVDTYSLESWR
755	1::sw|O06973|YVCJ_BACSU	UPF0042 nucleotide-binding protein YvcJ OS=Bacillus subtilis (strain 168) GN=yvcJ PE=1 SV=1	67	33944	25.51	DKEVSSYVMK
755	1::sw|O06973|YVCJ_BACSU	UPF0042 nucleotide-binding protein YvcJ OS=Bacillus subtilis (strain 168) GN=yvcJ PE=1 SV=1	67	33944	27.99	DYYTHVTHR
755	1::sw|O06973|YVCJ_BACSU	UPF0042 nucleotide-binding protein YvcJ OS=Bacillus subtilis (strain 168) GN=yvcJ PE=1 SV=1	67	33944	51.51	YGIPIDADLVFDVR
994	1::sw|O06974|GNGF_BACSU	Gluconeogenesis factor OS=Bacillus subtilis (strain 168) GN=mgfK PE=3 SV=1	33	34779	19.13	VASLLVDLLK
994	1::sw|O06974|GNGF_BACSU	Gluconeogenesis factor OS=Bacillus subtilis (strain 168) GN=mgfK PE=3 SV=1	33	34779	25.47	VASLLVDLLKE
994	1::sw|O06974|GNGF_BACSU	Gluconeogenesis factor OS=Bacillus subtilis (strain 168) GN=mgfK PE=3 SV=1	33	34779	28.89	NVLAALSDVEPLVEDLFQHR
757	1::sw|O06979|YVCQ_BACSU	Sensor histidine kinase YvcQ OS=Bacillus subtilis (strain 168) GN=yvcQ PE=3 SV=1	66	40212	45.26	TGEQALWTK
757	1::sw|O06979|YVCQ_BACSU	Sensor histidine kinase YvcQ OS=Bacillus subtilis (strain 168) GN=yvcQ PE=3 SV=1	66	40212	18.79	QGVGDPITIR
757	1::sw|O06979|YVCQ_BACSU	Sensor histidine kinase YvcQ OS=Bacillus subtilis (strain 168) GN=yvcQ PE=3 SV=1	66	40212	21.86	IETQGHETR
757	1::sw|O06979|YVCQ_BACSU	Sensor histidine kinase YvcQ OS=Bacillus subtilis (strain 168) GN=yvcQ PE=3 SV=1	66	40212	33.22	TPVSVISLMIQEGK
898	1::sw|O06980|YVCR_BACSU	Uncharacterized ABC transporter ATP-binding protein YvcR OS=Bacillus subtilis (strain 168) GN=yvcR PE=3 SV=1	45	29134	30.78	ENILLPLALDK
898	1::sw|O06980|YVCR_BACSU	Uncharacterized ABC transporter ATP-binding protein YvcR OS=Bacillus subtilis (strain 168) GN=yvcR PE=3 SV=1	45	29134	30.98	TYEVSGGQQQR
938	1::sw|O06986|YVDD_BACSU	LOG family protein YvdD OS=Bacillus subtilis (strain 168) GN=yvdD PE=1 SV=1	39	21154	37.45	AAELGVYMAEQGIGLVYGGSR
938	1::sw|O06986|YVDD_BACSU	LOG family protein YvdD OS=Bacillus subtilis (strain 168) GN=yvdD PE=1 SV=1	39	21154	22.18	KAAELGVYMAEQGIGLVYGGSR
148	1::sw|O07020|LUTA_BACSU	Lactate utilization protein A OS=Bacillus subtilis (strain 168) GN=lutA PE=1 SV=1	658	27002	64.93	ATVELLER
148	1::sw|O07020|LUTA_BACSU	Lactate utilization protein A OS=Bacillus subtilis (strain 168) GN=lutA PE=1 SV=1	658	27002	68.54	ATVELLER
148	1::sw|O07020|LUTA_BACSU	Lactate utilization protein A OS=Bacillus subtilis (strain 168) GN=lutA PE=1 SV=1	658	27002	60.54	GLQFTELPGK
148	1::sw|O07020|LUTA_BACSU	Lactate utilization protein A OS=Bacillus subtilis (strain 168) GN=lutA PE=1 SV=1	658	27002	46.06	GLQFTELPGK
148	1::sw|O07020|LUTA_BACSU	Lactate utilization protein A OS=Bacillus subtilis (strain 168) GN=lutA PE=1 SV=1	658	27002	74.06	VMHIAEVLNSR
148	1::sw|O07020|LUTA_BACSU	Lactate utilization protein A OS=Bacillus subtilis (strain 168) GN=lutA PE=1 SV=1	658	27002	35.91	VMHIAEVLNSR
148	1::sw|O07020|LUTA_BACSU	Lactate utilization protein A OS=Bacillus subtilis (strain 168) GN=lutA PE=1 SV=1	658	27002	64.97	VMHIAEVLNSR
148	1::sw|O07020|LUTA_BACSU	Lactate utilization protein A OS=Bacillus subtilis (strain 168) GN=lutA PE=1 SV=1	658	27002	62.7	VMHIAEVLNSR	Oxidation (M)
148	1::sw|O07020|LUTA_BACSU	Lactate utilization protein A OS=Bacillus subtilis (strain 168) GN=lutA PE=1 SV=1	658	27002	43.47	ATLHTSCHMTR
148	1::sw|O07020|LUTA_BACSU	Lactate utilization protein A OS=Bacillus subtilis (strain 168) GN=lutA PE=1 SV=1	658	27002	27.02	ATLHTSCHMTR
148	1::sw|O07020|LUTA_BACSU	Lactate utilization protein A OS=Bacillus subtilis (strain 168) GN=lutA PE=1 SV=1	658	27002	21.93	ATLHTSCHMTR	Oxidation (M)
148	1::sw|O07020|LUTA_BACSU	Lactate utilization protein A OS=Bacillus subtilis (strain 168) GN=lutA PE=1 SV=1	658	27002	27.99	ATLHTSCHMTR	Oxidation (M)
148	1::sw|O07020|LUTA_BACSU	Lactate utilization protein A OS=Bacillus subtilis (strain 168) GN=lutA PE=1 SV=1	658	27002	23.28	EYPHLFQDDPK
148	1::sw|O07020|LUTA_BACSU	Lactate utilization protein A OS=Bacillus subtilis (strain 168) GN=lutA PE=1 SV=1	658	27002	77.08	MAQISEQMVDEK
148	1::sw|O07020|LUTA_BACSU	Lactate utilization protein A OS=Bacillus subtilis (strain 168) GN=lutA PE=1 SV=1	658	27002	69.5	MAQISEQMVDEK
148	1::sw|O07020|LUTA_BACSU	Lactate utilization protein A OS=Bacillus subtilis (strain 168) GN=lutA PE=1 SV=1	658	27002	78.01	MAQISEQMVDEK
148	1::sw|O07020|LUTA_BACSU	Lactate utilization protein A OS=Bacillus subtilis (strain 168) GN=lutA PE=1 SV=1	658	27002	63.93	MAQISEQMVDEK	Oxidation (M)
148	1::sw|O07020|LUTA_BACSU	Lactate utilization protein A OS=Bacillus subtilis (strain 168) GN=lutA PE=1 SV=1	658	27002	50.48	HNCCGFGGTFSVK
148	1::sw|O07020|LUTA_BACSU	Lactate utilization protein A OS=Bacillus subtilis (strain 168) GN=lutA PE=1 SV=1	658	27002	60.25	VSLFVTCLVDMFQTNVGK
80	1::sw|O07021|LUTB_BACSU	Lactate utilization protein B OS=Bacillus subtilis (strain 168) GN=lutB PE=1 SV=2	1062	53953	32.18	DFPAPHK
80	1::sw|O07021|LUTB_BACSU	Lactate utilization protein B OS=Bacillus subtilis (strain 168) GN=lutB PE=1 SV=2	1062	53953	27.81	SLSEEIR
80	1::sw|O07021|LUTB_BACSU	Lactate utilization protein B OS=Bacillus subtilis (strain 168) GN=lutB PE=1 SV=2	1062	53953	58.6	GAVSGAQER
80	1::sw|O07021|LUTB_BACSU	Lactate utilization protein B OS=Bacillus subtilis (strain 168) GN=lutB PE=1 SV=2	1062	53953	42.26	GAVSGAQER
80	1::sw|O07021|LUTB_BACSU	Lactate utilization protein B OS=Bacillus subtilis (strain 168) GN=lutB PE=1 SV=2	1062	53953	26.23	RGGHVYFAK
80	1::sw|O07021|LUTB_BACSU	Lactate utilization protein B OS=Bacillus subtilis (strain 168) GN=lutB PE=1 SV=2	1062	53953	39.2	IPLHELLLK
80	1::sw|O07021|LUTB_BACSU	Lactate utilization protein B OS=Bacillus subtilis (strain 168) GN=lutB PE=1 SV=2	1062	53953	21.8	IPLHELLLK
80	1::sw|O07021|LUTB_BACSU	Lactate utilization protein B OS=Bacillus subtilis (strain 168) GN=lutB PE=1 SV=2	1062	53953	26.93	IPLHELLLK
80	1::sw|O07021|LUTB_BACSU	Lactate utilization protein B OS=Bacillus subtilis (strain 168) GN=lutB PE=1 SV=2	1062	53953	26.68	IPLHELLLK
80	1::sw|O07021|LUTB_BACSU	Lactate utilization protein B OS=Bacillus subtilis (strain 168) GN=lutB PE=1 SV=2	1062	53953	43.75	FRDWFADR
80	1::sw|O07021|LUTB_BACSU	Lactate utilization protein B OS=Bacillus subtilis (strain 168) GN=lutB PE=1 SV=2	1062	53953	21.68	TAEEASSYIR
80	1::sw|O07021|LUTB_BACSU	Lactate utilization protein B OS=Bacillus subtilis (strain 168) GN=lutB PE=1 SV=2	1062	53953	64.26	TAEEASSYIR
80	1::sw|O07021|LUTB_BACSU	Lactate utilization protein B OS=Bacillus subtilis (strain 168) GN=lutB PE=1 SV=2	1062	53953	83.5	TAEEASSYIR
80	1::sw|O07021|LUTB_BACSU	Lactate utilization protein B OS=Bacillus subtilis (strain 168) GN=lutB PE=1 SV=2	1062	53953	51.89	TAEEASSYIR
80	1::sw|O07021|LUTB_BACSU	Lactate utilization protein B OS=Bacillus subtilis (strain 168) GN=lutB PE=1 SV=2	1062	53953	47.96	TAEEASSYIR
80	1::sw|O07021|LUTB_BACSU	Lactate utilization protein B OS=Bacillus subtilis (strain 168) GN=lutB PE=1 SV=2	1062	53953	69.15	TAEEASSYIR
80	1::sw|O07021|LUTB_BACSU	Lactate utilization protein B OS=Bacillus subtilis (strain 168) GN=lutB PE=1 SV=2	1062	53953	46.58	TQITVMGMER
80	1::sw|O07021|LUTB_BACSU	Lactate utilization protein B OS=Bacillus subtilis (strain 168) GN=lutB PE=1 SV=2	1062	53953	19.27	TQITVMGMER
80	1::sw|O07021|LUTB_BACSU	Lactate utilization protein B OS=Bacillus subtilis (strain 168) GN=lutB PE=1 SV=2	1062	53953	44.44	TQITVMGMER
80	1::sw|O07021|LUTB_BACSU	Lactate utilization protein B OS=Bacillus subtilis (strain 168) GN=lutB PE=1 SV=2	1062	53953	24.09	TQITVMGMER	Oxidation (M)
80	1::sw|O07021|LUTB_BACSU	Lactate utilization protein B OS=Bacillus subtilis (strain 168) GN=lutB PE=1 SV=2	1062	53953	21.83	TQITVMGMER	Oxidation (M)
80	1::sw|O07021|LUTB_BACSU	Lactate utilization protein B OS=Bacillus subtilis (strain 168) GN=lutB PE=1 SV=2	1062	53953	31.09	TQITVMGMER	2 Oxidation (M)
80	1::sw|O07021|LUTB_BACSU	Lactate utilization protein B OS=Bacillus subtilis (strain 168) GN=lutB PE=1 SV=2	1062	53953	93.33	LTSYITALTGPK
80	1::sw|O07021|LUTB_BACSU	Lactate utilization protein B OS=Bacillus subtilis (strain 168) GN=lutB PE=1 SV=2	1062	53953	64.57	LTSYITALTGPK
80	1::sw|O07021|LUTB_BACSU	Lactate utilization protein B OS=Bacillus subtilis (strain 168) GN=lutB PE=1 SV=2	1062	53953	37.48	LTSYITALTGPK
80	1::sw|O07021|LUTB_BACSU	Lactate utilization protein B OS=Bacillus subtilis (strain 168) GN=lutB PE=1 SV=2	1062	53953	29.14	LTSYITALTGPK
80	1::sw|O07021|LUTB_BACSU	Lactate utilization protein B OS=Bacillus subtilis (strain 168) GN=lutB PE=1 SV=2	1062	53953	55.23	VSQGIDNEFMR
80	1::sw|O07021|LUTB_BACSU	Lactate utilization protein B OS=Bacillus subtilis (strain 168) GN=lutB PE=1 SV=2	1062	53953	87.32	AFGLGASSLSLYK
80	1::sw|O07021|LUTB_BACSU	Lactate utilization protein B OS=Bacillus subtilis (strain 168) GN=lutB PE=1 SV=2	1062	53953	40.56	AFGLGASSLSLYK
80	1::sw|O07021|LUTB_BACSU	Lactate utilization protein B OS=Bacillus subtilis (strain 168) GN=lutB PE=1 SV=2	1062	53953	71.88	AFGLGASSLSLYK
80	1::sw|O07021|LUTB_BACSU	Lactate utilization protein B OS=Bacillus subtilis (strain 168) GN=lutB PE=1 SV=2	1062	53953	46.32	WAPAAMTPFTEDEK
80	1::sw|O07021|LUTB_BACSU	Lactate utilization protein B OS=Bacillus subtilis (strain 168) GN=lutB PE=1 SV=2	1062	53953	67.14	LEAAEELGNWEEWR
80	1::sw|O07021|LUTB_BACSU	Lactate utilization protein B OS=Bacillus subtilis (strain 168) GN=lutB PE=1 SV=2	1062	53953	90.17	SMVTEEINLNEVLEK
80	1::sw|O07021|LUTB_BACSU	Lactate utilization protein B OS=Bacillus subtilis (strain 168) GN=lutB PE=1 SV=2	1062	53953	62.18	SNILGTEFQSVLQCIR
80	1::sw|O07021|LUTB_BACSU	Lactate utilization protein B OS=Bacillus subtilis (strain 168) GN=lutB PE=1 SV=2	1062	53953	34.41	RLEAAEELGNWEEWR
80	1::sw|O07021|LUTB_BACSU	Lactate utilization protein B OS=Bacillus subtilis (strain 168) GN=lutB PE=1 SV=2	1062	53953	57.2	IVPSFSEFEVLVSMLTR
80	1::sw|O07021|LUTB_BACSU	Lactate utilization protein B OS=Bacillus subtilis (strain 168) GN=lutB PE=1 SV=2	1062	53953	21.94	IVPSFSEFEVLVSMLTR
80	1::sw|O07021|LUTB_BACSU	Lactate utilization protein B OS=Bacillus subtilis (strain 168) GN=lutB PE=1 SV=2	1062	53953	40.86	LDYQHTEKPEELVMHAR
80	1::sw|O07021|LUTB_BACSU	Lactate utilization protein B OS=Bacillus subtilis (strain 168) GN=lutB PE=1 SV=2	1062	53953	38.02	QHVLENLDFYLGQLAENVAK
481	1::sw|O07516|YHAH_BACSU	Uncharacterized membrane protein YhaH OS=Bacillus subtilis (strain 168) GN=yhaH PE=4 SV=1	150	13058	25.01	EIADIEEK
481	1::sw|O07516|YHAH_BACSU	Uncharacterized membrane protein YhaH OS=Bacillus subtilis (strain 168) GN=yhaH PE=4 SV=1	150	13058	34.27	DVGGELQTSIK
481	1::sw|O07516|YHAH_BACSU	Uncharacterized membrane protein YhaH OS=Bacillus subtilis (strain 168) GN=yhaH PE=4 SV=1	150	13058	33.87	DVGGELQTSIK
481	1::sw|O07516|YHAH_BACSU	Uncharacterized membrane protein YhaH OS=Bacillus subtilis (strain 168) GN=yhaH PE=4 SV=1	150	13058	23.03	DVGGELQTSIK
481	1::sw|O07516|YHAH_BACSU	Uncharacterized membrane protein YhaH OS=Bacillus subtilis (strain 168) GN=yhaH PE=4 SV=1	150	13058	59.98	TNYDSFEETIK
481	1::sw|O07516|YHAH_BACSU	Uncharacterized membrane protein YhaH OS=Bacillus subtilis (strain 168) GN=yhaH PE=4 SV=1	150	13058	68.56	TNYDSFEETIKR
1067	1::sw|O07520|YHAL_BACSU	Sporulation protein YhaL OS=Bacillus subtilis (strain 168) GN=yhaL PE=1 SV=1	25	8491	24.69	EGQIYMER
551	1::sw|O07521|YHAM_BACSU	3~-5~ exoribonuclease YhaM OS=Bacillus subtilis (strain 168) GN=yhaM PE=1 SV=1	123	35660	19.06	VKPGEYTER
551	1::sw|O07521|YHAM_BACSU	3~-5~ exoribonuclease YhaM OS=Bacillus subtilis (strain 168) GN=yhaM PE=1 SV=1	123	35660	31.76	VVGDVHHYR
551	1::sw|O07521|YHAM_BACSU	3~-5~ exoribonuclease YhaM OS=Bacillus subtilis (strain 168) GN=yhaM PE=1 SV=1	123	35660	25.09	AIADLYPSLDR
551	1::sw|O07521|YHAM_BACSU	3~-5~ exoribonuclease YhaM OS=Bacillus subtilis (strain 168) GN=yhaM PE=1 SV=1	123	35660	88.44	DLLYAGVILHDLGK
551	1::sw|O07521|YHAM_BACSU	3~-5~ exoribonuclease YhaM OS=Bacillus subtilis (strain 168) GN=yhaM PE=1 SV=1	123	35660	25.97	DLLYAGVILHDLGK
551	1::sw|O07521|YHAM_BACSU	3~-5~ exoribonuclease YhaM OS=Bacillus subtilis (strain 168) GN=yhaM PE=1 SV=1	123	35660	23.62	GIMLHEVGEQVDQYLLIK
301	1::sw|O07523|YHAP_BACSU	Uncharacterized protein YhaP OS=Bacillus subtilis (strain 168) GN=yhaP PE=1 SV=2	285	45446	25.02	GTISGTYK
301	1::sw|O07523|YHAP_BACSU	Uncharacterized protein YhaP OS=Bacillus subtilis (strain 168) GN=yhaP PE=1 SV=2	285	45446	41.66	AVDTDGDLDVK
301	1::sw|O07523|YHAP_BACSU	Uncharacterized protein YhaP OS=Bacillus subtilis (strain 168) GN=yhaP PE=1 SV=2	285	45446	56.95	AVDTDGDLDVK
301	1::sw|O07523|YHAP_BACSU	Uncharacterized protein YhaP OS=Bacillus subtilis (strain 168) GN=yhaP PE=1 SV=2	285	45446	62.2	AVDTDGDLDVK
301	1::sw|O07523|YHAP_BACSU	Uncharacterized protein YhaP OS=Bacillus subtilis (strain 168) GN=yhaP PE=1 SV=2	285	45446	22.24	AVDTDGDLDVK
301	1::sw|O07523|YHAP_BACSU	Uncharacterized protein YhaP OS=Bacillus subtilis (strain 168) GN=yhaP PE=1 SV=2	285	45446	57.96	AVDTDGDLDVK
301	1::sw|O07523|YHAP_BACSU	Uncharacterized protein YhaP OS=Bacillus subtilis (strain 168) GN=yhaP PE=1 SV=2	285	45446	24.93	AVDTDGDLDVK
301	1::sw|O07523|YHAP_BACSU	Uncharacterized protein YhaP OS=Bacillus subtilis (strain 168) GN=yhaP PE=1 SV=2	285	45446	74.42	DESLDGMLIIK
301	1::sw|O07523|YHAP_BACSU	Uncharacterized protein YhaP OS=Bacillus subtilis (strain 168) GN=yhaP PE=1 SV=2	285	45446	59.01	DESLDGMLIIK
301	1::sw|O07523|YHAP_BACSU	Uncharacterized protein YhaP OS=Bacillus subtilis (strain 168) GN=yhaP PE=1 SV=2	285	45446	33.69	GGVLIYGNSSAFK
301	1::sw|O07523|YHAP_BACSU	Uncharacterized protein YhaP OS=Bacillus subtilis (strain 168) GN=yhaP PE=1 SV=2	285	45446	31.3	FWIMLSHTYK
301	1::sw|O07523|YHAP_BACSU	Uncharacterized protein YhaP OS=Bacillus subtilis (strain 168) GN=yhaP PE=1 SV=2	285	45446	24.58	IAVVDETNELYPVFSK
1002	1::sw|O07539|YHAX_BACSU	Stress response protein YhaX OS=Bacillus subtilis (strain 168) GN=yhaX PE=1 SV=2	32	32444	31.98	QLLALNIDGALLR
522	1::sw|O07543|YHEB_BACSU	UPF0754 membrane protein YheB OS=Bacillus subtilis (strain 168) GN=yheB PE=3 SV=1	134	42881	42.46	VGEQLIQK
522	1::sw|O07543|YHEB_BACSU	UPF0754 membrane protein YheB OS=Bacillus subtilis (strain 168) GN=yheB PE=3 SV=1	134	42881	21.64	QYGDQSLK
522	1::sw|O07543|YHEB_BACSU	UPF0754 membrane protein YheB OS=Bacillus subtilis (strain 168) GN=yheB PE=3 SV=1	134	42881	33.78	LSLSEVTVK
522	1::sw|O07543|YHEB_BACSU	UPF0754 membrane protein YheB OS=Bacillus subtilis (strain 168) GN=yheB PE=3 SV=1	134	42881	43.21	LEEMVLSISK
522	1::sw|O07543|YHEB_BACSU	UPF0754 membrane protein YheB OS=Bacillus subtilis (strain 168) GN=yheB PE=3 SV=1	134	42881	51.75	LGNMIDDFLK
522	1::sw|O07543|YHEB_BACSU	UPF0754 membrane protein YheB OS=Bacillus subtilis (strain 168) GN=yheB PE=3 SV=1	134	42881	19.04	ELVPIEVQEK
522	1::sw|O07543|YHEB_BACSU	UPF0754 membrane protein YheB OS=Bacillus subtilis (strain 168) GN=yheB PE=3 SV=1	134	42881	37.55	EYTFNEADEK
522	1::sw|O07543|YHEB_BACSU	UPF0754 membrane protein YheB OS=Bacillus subtilis (strain 168) GN=yheB PE=3 SV=1	134	42881	30.08	EQVDQFPVER
816	1::sw|O07550|YHEI_BACSU	Probable multidrug resistance ABC transporter ATP-binding/permease protein YheI OS=Bacillus subtilis (strain 168) GN=yheI PE=1 SV=1	57	65070	19.19	VLESVSGVR
816	1::sw|O07550|YHEI_BACSU	Probable multidrug resistance ABC transporter ATP-binding/permease protein YheI OS=Bacillus subtilis (strain 168) GN=yheI PE=1 SV=1	57	65070	56.58	VAFIDSLFEPTVK
419	1::sw|O07556|YHJB_BACSU	Uncharacterized symporter YhjB OS=Bacillus subtilis (strain 168) GN=yhjB PE=3 SV=1	178	52784	18.25	TTEQQVSALAK
419	1::sw|O07556|YHJB_BACSU	Uncharacterized symporter YhjB OS=Bacillus subtilis (strain 168) GN=yhjB PE=3 SV=1	178	52784	56.9	TTEQQVSALAK
419	1::sw|O07556|YHJB_BACSU	Uncharacterized symporter YhjB OS=Bacillus subtilis (strain 168) GN=yhjB PE=3 SV=1	178	52784	21.74	TTEQQVSALAK
419	1::sw|O07556|YHJB_BACSU	Uncharacterized symporter YhjB OS=Bacillus subtilis (strain 168) GN=yhjB PE=3 SV=1	178	52784	35.45	TTEQQVSALAK
419	1::sw|O07556|YHJB_BACSU	Uncharacterized symporter YhjB OS=Bacillus subtilis (strain 168) GN=yhjB PE=3 SV=1	178	52784	52.63	TTEQQVSALAK
419	1::sw|O07556|YHJB_BACSU	Uncharacterized symporter YhjB OS=Bacillus subtilis (strain 168) GN=yhjB PE=3 SV=1	178	52784	46.3	TTEQQVSALAK
419	1::sw|O07556|YHJB_BACSU	Uncharacterized symporter YhjB OS=Bacillus subtilis (strain 168) GN=yhjB PE=3 SV=1	178	52784	54.6	TTEQQVSALAK
419	1::sw|O07556|YHJB_BACSU	Uncharacterized symporter YhjB OS=Bacillus subtilis (strain 168) GN=yhjB PE=3 SV=1	178	52784	27.86	TTEQQVSALAK
419	1::sw|O07556|YHJB_BACSU	Uncharacterized symporter YhjB OS=Bacillus subtilis (strain 168) GN=yhjB PE=3 SV=1	178	52784	30.19	LMSQSDFFTK
1091	1::sw|O07557|YHJC_BACSU	Uncharacterized membrane protein YhjC OS=Bacillus subtilis (strain 168) GN=yhjC PE=4 SV=1	22	7376	22.29	LIHVLAALPFIGILLGIPFANK
893	1::sw|O07573|NSRR_BACSU	HTH-type transcriptional regulator NsrR OS=Bacillus subtilis (strain 168) GN=nsrR PE=4 SV=1	45	16770	21.03	NKEDIMK
893	1::sw|O07573|NSRR_BACSU	HTH-type transcriptional regulator NsrR OS=Bacillus subtilis (strain 168) GN=nsrR PE=4 SV=1	45	16770	45.14	LGQLGYVETIR
184	1::sw|O07576|YHDG_BACSU	Uncharacterized amino acid permease YhdG OS=Bacillus subtilis (strain 168) GN=yhdG PE=2 SV=1	513	49906	27.11	KQPDLPR
184	1::sw|O07576|YHDG_BACSU	Uncharacterized amino acid permease YhdG OS=Bacillus subtilis (strain 168) GN=yhdG PE=2 SV=1	513	49906	21.11	DGLVPGSLSK
184	1::sw|O07576|YHDG_BACSU	Uncharacterized amino acid permease YhdG OS=Bacillus subtilis (strain 168) GN=yhdG PE=2 SV=1	513	49906	20.73	DGLVPGSLSK
184	1::sw|O07576|YHDG_BACSU	Uncharacterized amino acid permease YhdG OS=Bacillus subtilis (strain 168) GN=yhdG PE=2 SV=1	513	49906	20.93	DGLVPGSLSK
184	1::sw|O07576|YHDG_BACSU	Uncharacterized amino acid permease YhdG OS=Bacillus subtilis (strain 168) GN=yhdG PE=2 SV=1	513	49906	76.81	SIQDLIAATSGEK
184	1::sw|O07576|YHDG_BACSU	Uncharacterized amino acid permease YhdG OS=Bacillus subtilis (strain 168) GN=yhdG PE=2 SV=1	513	49906	88.01	SIQDLIAATSGEK
184	1::sw|O07576|YHDG_BACSU	Uncharacterized amino acid permease YhdG OS=Bacillus subtilis (strain 168) GN=yhdG PE=2 SV=1	513	49906	101.16	SIQDLIAATSGEK
184	1::sw|O07576|YHDG_BACSU	Uncharacterized amino acid permease YhdG OS=Bacillus subtilis (strain 168) GN=yhdG PE=2 SV=1	513	49906	47.28	SIQDLIAATSGEK
184	1::sw|O07576|YHDG_BACSU	Uncharacterized amino acid permease YhdG OS=Bacillus subtilis (strain 168) GN=yhdG PE=2 SV=1	513	49906	69.1	SIQDLIAATSGEK
184	1::sw|O07576|YHDG_BACSU	Uncharacterized amino acid permease YhdG OS=Bacillus subtilis (strain 168) GN=yhdG PE=2 SV=1	513	49906	77.15	SIQDLIAATSGEK
184	1::sw|O07576|YHDG_BACSU	Uncharacterized amino acid permease YhdG OS=Bacillus subtilis (strain 168) GN=yhdG PE=2 SV=1	513	49906	93.02	SIQDLIAATSGEK
184	1::sw|O07576|YHDG_BACSU	Uncharacterized amino acid permease YhdG OS=Bacillus subtilis (strain 168) GN=yhdG PE=2 SV=1	513	49906	98.89	SIQDLIAATSGEK
523	1::sw|O07581|YHDL_BACSU	Probable anti-sigma-M factor YhdL OS=Bacillus subtilis (strain 168) GN=yhdL PE=1 SV=1	134	40612	20.99	WAQVISK
523	1::sw|O07581|YHDL_BACSU	Probable anti-sigma-M factor YhdL OS=Bacillus subtilis (strain 168) GN=yhdL PE=1 SV=1	134	40612	21.97	WAQVISK
523	1::sw|O07581|YHDL_BACSU	Probable anti-sigma-M factor YhdL OS=Bacillus subtilis (strain 168) GN=yhdL PE=1 SV=1	134	40612	21.25	VEMFYNK
523	1::sw|O07581|YHDL_BACSU	Probable anti-sigma-M factor YhdL OS=Bacillus subtilis (strain 168) GN=yhdL PE=1 SV=1	134	40612	20.29	TASTEPLGYPGK
523	1::sw|O07581|YHDL_BACSU	Probable anti-sigma-M factor YhdL OS=Bacillus subtilis (strain 168) GN=yhdL PE=1 SV=1	134	40612	37.31	TASTEPLGYPGK
523	1::sw|O07581|YHDL_BACSU	Probable anti-sigma-M factor YhdL OS=Bacillus subtilis (strain 168) GN=yhdL PE=1 SV=1	134	40612	35.53	TGHYFTHPSNK
523	1::sw|O07581|YHDL_BACSU	Probable anti-sigma-M factor YhdL OS=Bacillus subtilis (strain 168) GN=yhdL PE=1 SV=1	134	40612	19.23	TGHYFTHPSNK
523	1::sw|O07581|YHDL_BACSU	Probable anti-sigma-M factor YhdL OS=Bacillus subtilis (strain 168) GN=yhdL PE=1 SV=1	134	40612	28.71	TGHYFTHPSNK
523	1::sw|O07581|YHDL_BACSU	Probable anti-sigma-M factor YhdL OS=Bacillus subtilis (strain 168) GN=yhdL PE=1 SV=1	134	40612	42.37	LFGMNTEFPLQK
523	1::sw|O07581|YHDL_BACSU	Probable anti-sigma-M factor YhdL OS=Bacillus subtilis (strain 168) GN=yhdL PE=1 SV=1	134	40612	38.35	LFGMNTEFPLQK
523	1::sw|O07581|YHDL_BACSU	Probable anti-sigma-M factor YhdL OS=Bacillus subtilis (strain 168) GN=yhdL PE=1 SV=1	134	40612	39.53	LFGMNTEFPLQK
379	1::sw|O07584|PLSC_BACSU	1-acyl-sn-glycerol-3-phosphate acyltransferase OS=Bacillus subtilis (strain 168) GN=plsC PE=1 SV=1	207	22023	21.88	WIGSFLK
379	1::sw|O07584|PLSC_BACSU	1-acyl-sn-glycerol-3-phosphate acyltransferase OS=Bacillus subtilis (strain 168) GN=plsC PE=1 SV=1	207	22023	24.34	WIGSFLK
379	1::sw|O07584|PLSC_BACSU	1-acyl-sn-glycerol-3-phosphate acyltransferase OS=Bacillus subtilis (strain 168) GN=plsC PE=1 SV=1	207	22023	18.62	IKELENK
379	1::sw|O07584|PLSC_BACSU	1-acyl-sn-glycerol-3-phosphate acyltransferase OS=Bacillus subtilis (strain 168) GN=plsC PE=1 SV=1	207	22023	41.95	KELFQNK
379	1::sw|O07584|PLSC_BACSU	1-acyl-sn-glycerol-3-phosphate acyltransferase OS=Bacillus subtilis (strain 168) GN=plsC PE=1 SV=1	207	22023	18.3	ENPGPSSIK
379	1::sw|O07584|PLSC_BACSU	1-acyl-sn-glycerol-3-phosphate acyltransferase OS=Bacillus subtilis (strain 168) GN=plsC PE=1 SV=1	207	22023	23.12	IHAFPVDR
379	1::sw|O07584|PLSC_BACSU	1-acyl-sn-glycerol-3-phosphate acyltransferase OS=Bacillus subtilis (strain 168) GN=plsC PE=1 SV=1	207	22023	35.01	GAVTIAQMGK	Oxidation (M)
379	1::sw|O07584|PLSC_BACSU	1-acyl-sn-glycerol-3-phosphate acyltransferase OS=Bacillus subtilis (strain 168) GN=plsC PE=1 SV=1	207	22023	41.22	TSEDVPLKR
379	1::sw|O07584|PLSC_BACSU	1-acyl-sn-glycerol-3-phosphate acyltransferase OS=Bacillus subtilis (strain 168) GN=plsC PE=1 SV=1	207	22023	41.73	TSEDVPLKR
379	1::sw|O07584|PLSC_BACSU	1-acyl-sn-glycerol-3-phosphate acyltransferase OS=Bacillus subtilis (strain 168) GN=plsC PE=1 SV=1	207	22023	21	KIHAFPVDR
379	1::sw|O07584|PLSC_BACSU	1-acyl-sn-glycerol-3-phosphate acyltransferase OS=Bacillus subtilis (strain 168) GN=plsC PE=1 SV=1	207	22023	44.38	LAAMTEALNQR
379	1::sw|O07584|PLSC_BACSU	1-acyl-sn-glycerol-3-phosphate acyltransferase OS=Bacillus subtilis (strain 168) GN=plsC PE=1 SV=1	207	22023	40.89	EGEIVGIFPSGTR
379	1::sw|O07584|PLSC_BACSU	1-acyl-sn-glycerol-3-phosphate acyltransferase OS=Bacillus subtilis (strain 168) GN=plsC PE=1 SV=1	207	22023	20.94	APLVPAAYQGPSSGK
379	1::sw|O07584|PLSC_BACSU	1-acyl-sn-glycerol-3-phosphate acyltransferase OS=Bacillus subtilis (strain 168) GN=plsC PE=1 SV=1	207	22023	35.14	APLVPAAYQGPSSGK
379	1::sw|O07584|PLSC_BACSU	1-acyl-sn-glycerol-3-phosphate acyltransferase OS=Bacillus subtilis (strain 168) GN=plsC PE=1 SV=1	207	22023	65.66	APLVPAAYQGPSSGK
165	1::sw|O07585|YHDP_BACSU	UPF0053 protein YhdP OS=Bacillus subtilis (strain 168) GN=yhdP PE=3 SV=1	577	49995	58.35	IFEFDDR
165	1::sw|O07585|YHDP_BACSU	UPF0053 protein YhdP OS=Bacillus subtilis (strain 168) GN=yhdP PE=3 SV=1	577	49995	21.91	IILSESYK
165	1::sw|O07585|YHDP_BACSU	UPF0053 protein YhdP OS=Bacillus subtilis (strain 168) GN=yhdP PE=3 SV=1	577	49995	48.75	IILSESYK
165	1::sw|O07585|YHDP_BACSU	UPF0053 protein YhdP OS=Bacillus subtilis (strain 168) GN=yhdP PE=3 SV=1	577	49995	30.51	IILSESYK
165	1::sw|O07585|YHDP_BACSU	UPF0053 protein YhdP OS=Bacillus subtilis (strain 168) GN=yhdP PE=3 SV=1	577	49995	19.62	IILSESYK
165	1::sw|O07585|YHDP_BACSU	UPF0053 protein YhdP OS=Bacillus subtilis (strain 168) GN=yhdP PE=3 SV=1	577	49995	39.14	PLIWFYR
165	1::sw|O07585|YHDP_BACSU	UPF0053 protein YhdP OS=Bacillus subtilis (strain 168) GN=yhdP PE=3 SV=1	577	49995	52.08	IDQLIAEGNK
165	1::sw|O07585|YHDP_BACSU	UPF0053 protein YhdP OS=Bacillus subtilis (strain 168) GN=yhdP PE=3 SV=1	577	49995	38.74	SGEINQSEFK
165	1::sw|O07585|YHDP_BACSU	UPF0053 protein YhdP OS=Bacillus subtilis (strain 168) GN=yhdP PE=3 SV=1	577	49995	18.33	SGEINQSEFK
165	1::sw|O07585|YHDP_BACSU	UPF0053 protein YhdP OS=Bacillus subtilis (strain 168) GN=yhdP PE=3 SV=1	577	49995	42.94	SGEINQSEFK
165	1::sw|O07585|YHDP_BACSU	UPF0053 protein YhdP OS=Bacillus subtilis (strain 168) GN=yhdP PE=3 SV=1	577	49995	39.34	IGEGHYILDGK
165	1::sw|O07585|YHDP_BACSU	UPF0053 protein YhdP OS=Bacillus subtilis (strain 168) GN=yhdP PE=3 SV=1	577	49995	52.2	IGEGHYILDGK
165	1::sw|O07585|YHDP_BACSU	UPF0053 protein YhdP OS=Bacillus subtilis (strain 168) GN=yhdP PE=3 SV=1	577	49995	46.38	IGEGHYILDGK
165	1::sw|O07585|YHDP_BACSU	UPF0053 protein YhdP OS=Bacillus subtilis (strain 168) GN=yhdP PE=3 SV=1	577	49995	20.18	IGEGHYILDGK
165	1::sw|O07585|YHDP_BACSU	UPF0053 protein YhdP OS=Bacillus subtilis (strain 168) GN=yhdP PE=3 SV=1	577	49995	24.04	TEIVSLPHDIK
165	1::sw|O07585|YHDP_BACSU	UPF0053 protein YhdP OS=Bacillus subtilis (strain 168) GN=yhdP PE=3 SV=1	577	49995	24.85	TEIVSLPHDIK
165	1::sw|O07585|YHDP_BACSU	UPF0053 protein YhdP OS=Bacillus subtilis (strain 168) GN=yhdP PE=3 SV=1	577	49995	18.58	TEIVSLPHDIK
165	1::sw|O07585|YHDP_BACSU	UPF0053 protein YhdP OS=Bacillus subtilis (strain 168) GN=yhdP PE=3 SV=1	577	49995	42.71	TEIVSLPHDIK
165	1::sw|O07585|YHDP_BACSU	UPF0053 protein YhdP OS=Bacillus subtilis (strain 168) GN=yhdP PE=3 SV=1	577	49995	43.79	TEIVSLPHDIK
165	1::sw|O07585|YHDP_BACSU	UPF0053 protein YhdP OS=Bacillus subtilis (strain 168) GN=yhdP PE=3 SV=1	577	49995	54.73	TEIVSLPHDIK
165	1::sw|O07585|YHDP_BACSU	UPF0053 protein YhdP OS=Bacillus subtilis (strain 168) GN=yhdP PE=3 SV=1	577	49995	24.08	TEIVSLPHDIK
165	1::sw|O07585|YHDP_BACSU	UPF0053 protein YhdP OS=Bacillus subtilis (strain 168) GN=yhdP PE=3 SV=1	577	49995	57.67	KIGEGHYILDGK
165	1::sw|O07585|YHDP_BACSU	UPF0053 protein YhdP OS=Bacillus subtilis (strain 168) GN=yhdP PE=3 SV=1	577	49995	48.87	ISEMMDIIQIEK
165	1::sw|O07585|YHDP_BACSU	UPF0053 protein YhdP OS=Bacillus subtilis (strain 168) GN=yhdP PE=3 SV=1	577	49995	88.83	ISEMMDIIQIEK
165	1::sw|O07585|YHDP_BACSU	UPF0053 protein YhdP OS=Bacillus subtilis (strain 168) GN=yhdP PE=3 SV=1	577	49995	40.46	ISEMMDIIQIEK	Oxidation (M)
165	1::sw|O07585|YHDP_BACSU	UPF0053 protein YhdP OS=Bacillus subtilis (strain 168) GN=yhdP PE=3 SV=1	577	49995	52.03	IAFPFIWLLNNSAR
165	1::sw|O07585|YHDP_BACSU	UPF0053 protein YhdP OS=Bacillus subtilis (strain 168) GN=yhdP PE=3 SV=1	577	49995	25.39	YPVEEGDKDNIIGVINIK
165	1::sw|O07585|YHDP_BACSU	UPF0053 protein YhdP OS=Bacillus subtilis (strain 168) GN=yhdP PE=3 SV=1	577	49995	29.95	AFGLETVSENELAHSEEELR
602	1::sw|O07587|AAT3_BACSU	Putative aspartate aminotransferase YhdR OS=Bacillus subtilis (strain 168) GN=yhdR PE=3 SV=1	104	44032	25.29	DLGIAGER
602	1::sw|O07587|AAT3_BACSU	Putative aspartate aminotransferase YhdR OS=Bacillus subtilis (strain 168) GN=yhdR PE=3 SV=1	104	44032	56.97	VAQFLGSR
602	1::sw|O07587|AAT3_BACSU	Putative aspartate aminotransferase YhdR OS=Bacillus subtilis (strain 168) GN=yhdR PE=3 SV=1	104	44032	22.19	LGYIGLDSR
602	1::sw|O07587|AAT3_BACSU	Putative aspartate aminotransferase YhdR OS=Bacillus subtilis (strain 168) GN=yhdR PE=3 SV=1	104	44032	24.81	LYIENYGGK
602	1::sw|O07587|AAT3_BACSU	Putative aspartate aminotransferase YhdR OS=Bacillus subtilis (strain 168) GN=yhdR PE=3 SV=1	104	44032	33.15	FEADFSAER
602	1::sw|O07587|AAT3_BACSU	Putative aspartate aminotransferase YhdR OS=Bacillus subtilis (strain 168) GN=yhdR PE=3 SV=1	104	44032	27.53	NIDDLGALLK
602	1::sw|O07587|AAT3_BACSU	Putative aspartate aminotransferase YhdR OS=Bacillus subtilis (strain 168) GN=yhdR PE=3 SV=1	104	44032	36.14	FEIDIEAVR
1095	1::sw|O07595|NPD_BACSU	NAD-dependent protein deacetylase OS=Bacillus subtilis (strain 168) GN=cobB PE=3 SV=1	22	27685	21.98	SAGGIWTEDASR
386	1::sw|O07597|DAAA_BACSU	D-alanine aminotransferase OS=Bacillus subtilis (strain 168) GN=dat PE=3 SV=1	203	31220	44.48	MNILGLIEK
386	1::sw|O07597|DAAA_BACSU	D-alanine aminotransferase OS=Bacillus subtilis (strain 168) GN=dat PE=3 SV=1	203	31220	47.36	SLNLLYNVMTK
386	1::sw|O07597|DAAA_BACSU	D-alanine aminotransferase OS=Bacillus subtilis (strain 168) GN=dat PE=3 SV=1	203	31220	47.69	LDETPVSEEELK
386	1::sw|O07597|DAAA_BACSU	D-alanine aminotransferase OS=Bacillus subtilis (strain 168) GN=dat PE=3 SV=1	203	31220	73.54	AYEAGAFEAILLR
386	1::sw|O07597|DAAA_BACSU	D-alanine aminotransferase OS=Bacillus subtilis (strain 168) GN=dat PE=3 SV=1	203	31220	76.4	GYQFGDGIYEVIR
500	1::sw|O07598|YHAA_BACSU	Putative amidohydrolase YhaA OS=Bacillus subtilis (strain 168) GN=yhaA PE=3 SV=3	142	43478	78.06	PGAVMAAADR
500	1::sw|O07598|YHAA_BACSU	Putative amidohydrolase YhaA OS=Bacillus subtilis (strain 168) GN=yhaA PE=3 SV=3	142	43478	87.89	VLAGAAITYHQL
22	1::sw|O07605|GLTT_BACSU	Proton/sodium-glutamate symport protein OS=Bacillus subtilis (strain 168) GN=gltT PE=3 SV=1	2508	46004	25.51	IAGISIFK
22	1::sw|O07605|GLTT_BACSU	Proton/sodium-glutamate symport protein OS=Bacillus subtilis (strain 168) GN=gltT PE=3 SV=1	2508	46004	20.45	IAGISIFK
22	1::sw|O07605|GLTT_BACSU	Proton/sodium-glutamate symport protein OS=Bacillus subtilis (strain 168) GN=gltT PE=3 SV=1	2508	46004	27.52	IAGISIFK
22	1::sw|O07605|GLTT_BACSU	Proton/sodium-glutamate symport protein OS=Bacillus subtilis (strain 168) GN=gltT PE=3 SV=1	2508	46004	42.81	AETVMSQSK
22	1::sw|O07605|GLTT_BACSU	Proton/sodium-glutamate symport protein OS=Bacillus subtilis (strain 168) GN=gltT PE=3 SV=1	2508	46004	37.17	AETVMSQSK
22	1::sw|O07605|GLTT_BACSU	Proton/sodium-glutamate symport protein OS=Bacillus subtilis (strain 168) GN=gltT PE=3 SV=1	2508	46004	59.17	AETVMSQSK
22	1::sw|O07605|GLTT_BACSU	Proton/sodium-glutamate symport protein OS=Bacillus subtilis (strain 168) GN=gltT PE=3 SV=1	2508	46004	20.71	AETVMSQSK
22	1::sw|O07605|GLTT_BACSU	Proton/sodium-glutamate symport protein OS=Bacillus subtilis (strain 168) GN=gltT PE=3 SV=1	2508	46004	57.92	AETVMSQSK
22	1::sw|O07605|GLTT_BACSU	Proton/sodium-glutamate symport protein OS=Bacillus subtilis (strain 168) GN=gltT PE=3 SV=1	2508	46004	32.48	AETVMSQSK
22	1::sw|O07605|GLTT_BACSU	Proton/sodium-glutamate symport protein OS=Bacillus subtilis (strain 168) GN=gltT PE=3 SV=1	2508	46004	49	AETVMSQSK
22	1::sw|O07605|GLTT_BACSU	Proton/sodium-glutamate symport protein OS=Bacillus subtilis (strain 168) GN=gltT PE=3 SV=1	2508	46004	56.81	AETVMSQSK
22	1::sw|O07605|GLTT_BACSU	Proton/sodium-glutamate symport protein OS=Bacillus subtilis (strain 168) GN=gltT PE=3 SV=1	2508	46004	31.11	AETVMSQSK
22	1::sw|O07605|GLTT_BACSU	Proton/sodium-glutamate symport protein OS=Bacillus subtilis (strain 168) GN=gltT PE=3 SV=1	2508	46004	45.36	AETVMSQSK
22	1::sw|O07605|GLTT_BACSU	Proton/sodium-glutamate symport protein OS=Bacillus subtilis (strain 168) GN=gltT PE=3 SV=1	2508	46004	32.46	AETVMSQSK
22	1::sw|O07605|GLTT_BACSU	Proton/sodium-glutamate symport protein OS=Bacillus subtilis (strain 168) GN=gltT PE=3 SV=1	2508	46004	47.77	AETVMSQSK
22	1::sw|O07605|GLTT_BACSU	Proton/sodium-glutamate symport protein OS=Bacillus subtilis (strain 168) GN=gltT PE=3 SV=1	2508	46004	35.63	AETVMSQSK	Oxidation (M)
22	1::sw|O07605|GLTT_BACSU	Proton/sodium-glutamate symport protein OS=Bacillus subtilis (strain 168) GN=gltT PE=3 SV=1	2508	46004	45.08	AETVMSQSK	Oxidation (M)
22	1::sw|O07605|GLTT_BACSU	Proton/sodium-glutamate symport protein OS=Bacillus subtilis (strain 168) GN=gltT PE=3 SV=1	2508	46004	36.4	AETVMSQSK	Oxidation (M)
22	1::sw|O07605|GLTT_BACSU	Proton/sodium-glutamate symport protein OS=Bacillus subtilis (strain 168) GN=gltT PE=3 SV=1	2508	46004	26.64	WEGMFNPAK
22	1::sw|O07605|GLTT_BACSU	Proton/sodium-glutamate symport protein OS=Bacillus subtilis (strain 168) GN=gltT PE=3 SV=1	2508	46004	27.46	WEGMFNPAK
22	1::sw|O07605|GLTT_BACSU	Proton/sodium-glutamate symport protein OS=Bacillus subtilis (strain 168) GN=gltT PE=3 SV=1	2508	46004	31.6	WEGMFNPAK
22	1::sw|O07605|GLTT_BACSU	Proton/sodium-glutamate symport protein OS=Bacillus subtilis (strain 168) GN=gltT PE=3 SV=1	2508	46004	28.1	WEGMFNPAK
22	1::sw|O07605|GLTT_BACSU	Proton/sodium-glutamate symport protein OS=Bacillus subtilis (strain 168) GN=gltT PE=3 SV=1	2508	46004	21.55	WEGMFNPAK
22	1::sw|O07605|GLTT_BACSU	Proton/sodium-glutamate symport protein OS=Bacillus subtilis (strain 168) GN=gltT PE=3 SV=1	2508	46004	83.42	FGLGSLISLGK
22	1::sw|O07605|GLTT_BACSU	Proton/sodium-glutamate symport protein OS=Bacillus subtilis (strain 168) GN=gltT PE=3 SV=1	2508	46004	55.04	FGLGSLISLGK
22	1::sw|O07605|GLTT_BACSU	Proton/sodium-glutamate symport protein OS=Bacillus subtilis (strain 168) GN=gltT PE=3 SV=1	2508	46004	81.95	FGLGSLISLGK
22	1::sw|O07605|GLTT_BACSU	Proton/sodium-glutamate symport protein OS=Bacillus subtilis (strain 168) GN=gltT PE=3 SV=1	2508	46004	26.61	WEGMFNPAK	Oxidation (M)
22	1::sw|O07605|GLTT_BACSU	Proton/sodium-glutamate symport protein OS=Bacillus subtilis (strain 168) GN=gltT PE=3 SV=1	2508	46004	18.32	WEGMFNPAK	Oxidation (M)
22	1::sw|O07605|GLTT_BACSU	Proton/sodium-glutamate symport protein OS=Bacillus subtilis (strain 168) GN=gltT PE=3 SV=1	2508	46004	22.26	WEGMFNPAK	Oxidation (M)
22	1::sw|O07605|GLTT_BACSU	Proton/sodium-glutamate symport protein OS=Bacillus subtilis (strain 168) GN=gltT PE=3 SV=1	2508	46004	67.34	SDISQYVETEK
22	1::sw|O07605|GLTT_BACSU	Proton/sodium-glutamate symport protein OS=Bacillus subtilis (strain 168) GN=gltT PE=3 SV=1	2508	46004	72.59	SDISQYVETEK
22	1::sw|O07605|GLTT_BACSU	Proton/sodium-glutamate symport protein OS=Bacillus subtilis (strain 168) GN=gltT PE=3 SV=1	2508	46004	64.86	SDISQYVETEK
22	1::sw|O07605|GLTT_BACSU	Proton/sodium-glutamate symport protein OS=Bacillus subtilis (strain 168) GN=gltT PE=3 SV=1	2508	46004	64.3	SDISQYVETEK
22	1::sw|O07605|GLTT_BACSU	Proton/sodium-glutamate symport protein OS=Bacillus subtilis (strain 168) GN=gltT PE=3 SV=1	2508	46004	64.62	SDISQYVETEK
22	1::sw|O07605|GLTT_BACSU	Proton/sodium-glutamate symport protein OS=Bacillus subtilis (strain 168) GN=gltT PE=3 SV=1	2508	46004	68.3	SDISQYVETEK
22	1::sw|O07605|GLTT_BACSU	Proton/sodium-glutamate symport protein OS=Bacillus subtilis (strain 168) GN=gltT PE=3 SV=1	2508	46004	83.89	SDISQYVETEK
22	1::sw|O07605|GLTT_BACSU	Proton/sodium-glutamate symport protein OS=Bacillus subtilis (strain 168) GN=gltT PE=3 SV=1	2508	46004	45.71	SDISQYVETEK
22	1::sw|O07605|GLTT_BACSU	Proton/sodium-glutamate symport protein OS=Bacillus subtilis (strain 168) GN=gltT PE=3 SV=1	2508	46004	60.4	SDISQYVETEK
22	1::sw|O07605|GLTT_BACSU	Proton/sodium-glutamate symport protein OS=Bacillus subtilis (strain 168) GN=gltT PE=3 SV=1	2508	46004	78.83	SDISQYVETEK
22	1::sw|O07605|GLTT_BACSU	Proton/sodium-glutamate symport protein OS=Bacillus subtilis (strain 168) GN=gltT PE=3 SV=1	2508	46004	77.65	SDISQYVETEK
22	1::sw|O07605|GLTT_BACSU	Proton/sodium-glutamate symport protein OS=Bacillus subtilis (strain 168) GN=gltT PE=3 SV=1	2508	46004	49.76	SDISQYVETEK
22	1::sw|O07605|GLTT_BACSU	Proton/sodium-glutamate symport protein OS=Bacillus subtilis (strain 168) GN=gltT PE=3 SV=1	2508	46004	69.54	SDISQYVETEK
22	1::sw|O07605|GLTT_BACSU	Proton/sodium-glutamate symport protein OS=Bacillus subtilis (strain 168) GN=gltT PE=3 SV=1	2508	46004	47.24	SDISQYVETEK
22	1::sw|O07605|GLTT_BACSU	Proton/sodium-glutamate symport protein OS=Bacillus subtilis (strain 168) GN=gltT PE=3 SV=1	2508	46004	37.47	SDISQYVETEK
22	1::sw|O07605|GLTT_BACSU	Proton/sodium-glutamate symport protein OS=Bacillus subtilis (strain 168) GN=gltT PE=3 SV=1	2508	46004	45.33	VAPFGVFALIGVTVSK
22	1::sw|O07605|GLTT_BACSU	Proton/sodium-glutamate symport protein OS=Bacillus subtilis (strain 168) GN=gltT PE=3 SV=1	2508	46004	60.7	VAPFGVFALIGVTVSK
22	1::sw|O07605|GLTT_BACSU	Proton/sodium-glutamate symport protein OS=Bacillus subtilis (strain 168) GN=gltT PE=3 SV=1	2508	46004	70.56	VAPFGVFALIGVTVSK
22	1::sw|O07605|GLTT_BACSU	Proton/sodium-glutamate symport protein OS=Bacillus subtilis (strain 168) GN=gltT PE=3 SV=1	2508	46004	89.16	VAPFGVFALIGVTVSK
22	1::sw|O07605|GLTT_BACSU	Proton/sodium-glutamate symport protein OS=Bacillus subtilis (strain 168) GN=gltT PE=3 SV=1	2508	46004	60.47	TVVNLTGNALAAVVMSK
22	1::sw|O07605|GLTT_BACSU	Proton/sodium-glutamate symport protein OS=Bacillus subtilis (strain 168) GN=gltT PE=3 SV=1	2508	46004	96.18	TVVNLTGNALAAVVMSK
22	1::sw|O07605|GLTT_BACSU	Proton/sodium-glutamate symport protein OS=Bacillus subtilis (strain 168) GN=gltT PE=3 SV=1	2508	46004	97.48	TVVNLTGNALAAVVMSK
22	1::sw|O07605|GLTT_BACSU	Proton/sodium-glutamate symport protein OS=Bacillus subtilis (strain 168) GN=gltT PE=3 SV=1	2508	46004	114.62	TVVNLTGNALAAVVMSK
22	1::sw|O07605|GLTT_BACSU	Proton/sodium-glutamate symport protein OS=Bacillus subtilis (strain 168) GN=gltT PE=3 SV=1	2508	46004	100.05	TVVNLTGNALAAVVMSK
22	1::sw|O07605|GLTT_BACSU	Proton/sodium-glutamate symport protein OS=Bacillus subtilis (strain 168) GN=gltT PE=3 SV=1	2508	46004	99.58	TVVNLTGNALAAVVMSK
22	1::sw|O07605|GLTT_BACSU	Proton/sodium-glutamate symport protein OS=Bacillus subtilis (strain 168) GN=gltT PE=3 SV=1	2508	46004	107.38	TVVNLTGNALAAVVMSK
22	1::sw|O07605|GLTT_BACSU	Proton/sodium-glutamate symport protein OS=Bacillus subtilis (strain 168) GN=gltT PE=3 SV=1	2508	46004	86.03	TVVNLTGNALAAVVMSK
22	1::sw|O07605|GLTT_BACSU	Proton/sodium-glutamate symport protein OS=Bacillus subtilis (strain 168) GN=gltT PE=3 SV=1	2508	46004	104.35	TVVNLTGNALAAVVMSK
22	1::sw|O07605|GLTT_BACSU	Proton/sodium-glutamate symport protein OS=Bacillus subtilis (strain 168) GN=gltT PE=3 SV=1	2508	46004	114.42	TVVNLTGNALAAVVMSK
22	1::sw|O07605|GLTT_BACSU	Proton/sodium-glutamate symport protein OS=Bacillus subtilis (strain 168) GN=gltT PE=3 SV=1	2508	46004	36.99	TVVNLTGNALAAVVMSK
22	1::sw|O07605|GLTT_BACSU	Proton/sodium-glutamate symport protein OS=Bacillus subtilis (strain 168) GN=gltT PE=3 SV=1	2508	46004	43.68	TVVNLTGNALAAVVMSK
22	1::sw|O07605|GLTT_BACSU	Proton/sodium-glutamate symport protein OS=Bacillus subtilis (strain 168) GN=gltT PE=3 SV=1	2508	46004	41.89	TVVNLTGNALAAVVMSK
22	1::sw|O07605|GLTT_BACSU	Proton/sodium-glutamate symport protein OS=Bacillus subtilis (strain 168) GN=gltT PE=3 SV=1	2508	46004	55.01	TVVNLTGNALAAVVMSK	Oxidation (M)
22	1::sw|O07605|GLTT_BACSU	Proton/sodium-glutamate symport protein OS=Bacillus subtilis (strain 168) GN=gltT PE=3 SV=1	2508	46004	68.98	TVVNLTGNALAAVVMSK	Oxidation (M)
22	1::sw|O07605|GLTT_BACSU	Proton/sodium-glutamate symport protein OS=Bacillus subtilis (strain 168) GN=gltT PE=3 SV=1	2508	46004	61.47	TVVNLTGNALAAVVMSK	Oxidation (M)
22	1::sw|O07605|GLTT_BACSU	Proton/sodium-glutamate symport protein OS=Bacillus subtilis (strain 168) GN=gltT PE=3 SV=1	2508	46004	70.33	TVVNLTGNALAAVVMSK	Oxidation (M)
22	1::sw|O07605|GLTT_BACSU	Proton/sodium-glutamate symport protein OS=Bacillus subtilis (strain 168) GN=gltT PE=3 SV=1	2508	46004	44.05	TVVNLTGNALAAVVMSK	Oxidation (M)
22	1::sw|O07605|GLTT_BACSU	Proton/sodium-glutamate symport protein OS=Bacillus subtilis (strain 168) GN=gltT PE=3 SV=1	2508	46004	42.37	SDISQYVETEKEQSNK
22	1::sw|O07605|GLTT_BACSU	Proton/sodium-glutamate symport protein OS=Bacillus subtilis (strain 168) GN=gltT PE=3 SV=1	2508	46004	48.13	SDISQYVETEKEQSNK
22	1::sw|O07605|GLTT_BACSU	Proton/sodium-glutamate symport protein OS=Bacillus subtilis (strain 168) GN=gltT PE=3 SV=1	2508	46004	25.18	SDISQYVETEKEQSNK
22	1::sw|O07605|GLTT_BACSU	Proton/sodium-glutamate symport protein OS=Bacillus subtilis (strain 168) GN=gltT PE=3 SV=1	2508	46004	19.08	SDISQYVETEKEQSNK
22	1::sw|O07605|GLTT_BACSU	Proton/sodium-glutamate symport protein OS=Bacillus subtilis (strain 168) GN=gltT PE=3 SV=1	2508	46004	29.12	SDISQYVETEKEQSNK
22	1::sw|O07605|GLTT_BACSU	Proton/sodium-glutamate symport protein OS=Bacillus subtilis (strain 168) GN=gltT PE=3 SV=1	2508	46004	18.58	SDISQYVETEKEQSNK
22	1::sw|O07605|GLTT_BACSU	Proton/sodium-glutamate symport protein OS=Bacillus subtilis (strain 168) GN=gltT PE=3 SV=1	2508	46004	39.24	SDISQYVETEKEQSNK
22	1::sw|O07605|GLTT_BACSU	Proton/sodium-glutamate symport protein OS=Bacillus subtilis (strain 168) GN=gltT PE=3 SV=1	2508	46004	50.5	MIVIPIVVSSLIIGVAGAGNGK
312	1::sw|O07608|LPLJ_BACSU	Lipoate-protein ligase LplJ OS=Bacillus subtilis (strain 168) GN=lplJ PE=1 SV=1	274	38111	21.85	FNLNHSK
312	1::sw|O07608|LPLJ_BACSU	Lipoate-protein ligase LplJ OS=Bacillus subtilis (strain 168) GN=lplJ PE=1 SV=1	274	38111	30.66	HYFGNITK
312	1::sw|O07608|LPLJ_BACSU	Lipoate-protein ligase LplJ OS=Bacillus subtilis (strain 168) GN=lplJ PE=1 SV=1	274	38111	48.04	ISGNAQFATK
312	1::sw|O07608|LPLJ_BACSU	Lipoate-protein ligase LplJ OS=Bacillus subtilis (strain 168) GN=lplJ PE=1 SV=1	274	38111	43.54	DDGDSFHNFK
312	1::sw|O07608|LPLJ_BACSU	Lipoate-protein ligase LplJ OS=Bacillus subtilis (strain 168) GN=lplJ PE=1 SV=1	274	38111	97.79	VANISEFLDDK
312	1::sw|O07608|LPLJ_BACSU	Lipoate-protein ligase LplJ OS=Bacillus subtilis (strain 168) GN=lplJ PE=1 SV=1	274	38111	27.32	VANISEFLDDK
312	1::sw|O07608|LPLJ_BACSU	Lipoate-protein ligase LplJ OS=Bacillus subtilis (strain 168) GN=lplJ PE=1 SV=1	274	38111	31.56	VANISEFLDDK
312	1::sw|O07608|LPLJ_BACSU	Lipoate-protein ligase LplJ OS=Bacillus subtilis (strain 168) GN=lplJ PE=1 SV=1	274	38111	54.14	INLAIEEYCVK
312	1::sw|O07608|LPLJ_BACSU	Lipoate-protein ligase LplJ OS=Bacillus subtilis (strain 168) GN=lplJ PE=1 SV=1	274	38111	46.96	SVIADVLEGVNLK
312	1::sw|O07608|LPLJ_BACSU	Lipoate-protein ligase LplJ OS=Bacillus subtilis (strain 168) GN=lplJ PE=1 SV=1	274	38111	38.62	SVIADVLEGVNLK
312	1::sw|O07608|LPLJ_BACSU	Lipoate-protein ligase LplJ OS=Bacillus subtilis (strain 168) GN=lplJ PE=1 SV=1	274	38111	28.95	SVIADVLEGVNLK
312	1::sw|O07608|LPLJ_BACSU	Lipoate-protein ligase LplJ OS=Bacillus subtilis (strain 168) GN=lplJ PE=1 SV=1	274	38111	23.25	FTEPVIQALHQLGVEAELSGR
870	1::sw|O07609|YHFK_BACSU	Uncharacterized sugar epimerase YhfK OS=Bacillus subtilis (strain 168) GN=yhfK PE=2 SV=1	48	22803	47.88	AIEAAAIAGIK
1104	1::sw|O07611|YHFM_BACSU	Uncharacterized protein YhfM OS=Bacillus subtilis (strain 168) GN=yhfM PE=4 SV=1	20	14998	18.01	DGTYYKLSK
1104	1::sw|O07611|YHFM_BACSU	Uncharacterized protein YhfM OS=Bacillus subtilis (strain 168) GN=yhfM PE=4 SV=1	20	14998	20.44	TSAPDYEGTIK
1104	1::sw|O07611|YHFM_BACSU	Uncharacterized protein YhfM OS=Bacillus subtilis (strain 168) GN=yhfM PE=4 SV=1	20	14998	20.19	LWIDGSQQAVFLK
1052	1::sw|O07617|PHOE_BACSU	Uncharacterized phosphatase PhoE OS=Bacillus subtilis (strain 168) GN=phoE PE=3 SV=1	26	22151	18.29	VNQAYPNKK
1052	1::sw|O07617|PHOE_BACSU	Uncharacterized phosphatase PhoE OS=Bacillus subtilis (strain 168) GN=phoE PE=3 SV=1	26	22151	25.93	DFSWDIIVTSPLK
302	1::sw|O07620|BIOY_BACSU	Probable biotin transporter BioY OS=Bacillus subtilis (strain 168) GN=bioY PE=2 SV=1	284	19997	76.66	AAVSAFLAIK
302	1::sw|O07620|BIOY_BACSU	Probable biotin transporter BioY OS=Bacillus subtilis (strain 168) GN=bioY PE=2 SV=1	284	19997	70.83	AAVSAFLAIK
302	1::sw|O07620|BIOY_BACSU	Probable biotin transporter BioY OS=Bacillus subtilis (strain 168) GN=bioY PE=2 SV=1	284	19997	74.44	AAVSAFLAIK
302	1::sw|O07620|BIOY_BACSU	Probable biotin transporter BioY OS=Bacillus subtilis (strain 168) GN=bioY PE=2 SV=1	284	19997	31.45	ITQALSLSDTMFTK
302	1::sw|O07620|BIOY_BACSU	Probable biotin transporter BioY OS=Bacillus subtilis (strain 168) GN=bioY PE=2 SV=1	284	19997	76.2	ITQALSLSDTMFTK
302	1::sw|O07620|BIOY_BACSU	Probable biotin transporter BioY OS=Bacillus subtilis (strain 168) GN=bioY PE=2 SV=1	284	19997	56.25	ITQALSLSDTMFTK
133	1::sw|O07621|HEMAT_BACSU	Heme-based aerotactic transducer HemAT OS=Bacillus subtilis (strain 168) GN=hemAT PE=1 SV=1	719	48738	40.79	IASIHLR
133	1::sw|O07621|HEMAT_BACSU	Heme-based aerotactic transducer HemAT OS=Bacillus subtilis (strain 168) GN=hemAT PE=1 SV=1	719	48738	18.97	IASIHLR
133	1::sw|O07621|HEMAT_BACSU	Heme-based aerotactic transducer HemAT OS=Bacillus subtilis (strain 168) GN=hemAT PE=1 SV=1	719	48738	46.82	IASIHLR
133	1::sw|O07621|HEMAT_BACSU	Heme-based aerotactic transducer HemAT OS=Bacillus subtilis (strain 168) GN=hemAT PE=1 SV=1	719	48738	31.96	ELEVQQK
133	1::sw|O07621|HEMAT_BACSU	Heme-based aerotactic transducer HemAT OS=Bacillus subtilis (strain 168) GN=hemAT PE=1 SV=1	719	48738	20.24	ELEVQQK
133	1::sw|O07621|HEMAT_BACSU	Heme-based aerotactic transducer HemAT OS=Bacillus subtilis (strain 168) GN=hemAT PE=1 SV=1	719	48738	33.28	SEGISQASK
133	1::sw|O07621|HEMAT_BACSU	Heme-based aerotactic transducer HemAT OS=Bacillus subtilis (strain 168) GN=hemAT PE=1 SV=1	719	48738	39.63	SEGISQASK
133	1::sw|O07621|HEMAT_BACSU	Heme-based aerotactic transducer HemAT OS=Bacillus subtilis (strain 168) GN=hemAT PE=1 SV=1	719	48738	20.61	KELEVQQK
133	1::sw|O07621|HEMAT_BACSU	Heme-based aerotactic transducer HemAT OS=Bacillus subtilis (strain 168) GN=hemAT PE=1 SV=1	719	48738	46.39	GFAVVANEVR
133	1::sw|O07621|HEMAT_BACSU	Heme-based aerotactic transducer HemAT OS=Bacillus subtilis (strain 168) GN=hemAT PE=1 SV=1	719	48738	63.45	DVNELVSESK
133	1::sw|O07621|HEMAT_BACSU	Heme-based aerotactic transducer HemAT OS=Bacillus subtilis (strain 168) GN=hemAT PE=1 SV=1	719	48738	69.84	DVNELVSESK
133	1::sw|O07621|HEMAT_BACSU	Heme-based aerotactic transducer HemAT OS=Bacillus subtilis (strain 168) GN=hemAT PE=1 SV=1	719	48738	64.24	DVNELVSESK
133	1::sw|O07621|HEMAT_BACSU	Heme-based aerotactic transducer HemAT OS=Bacillus subtilis (strain 168) GN=hemAT PE=1 SV=1	719	48738	54.96	DVNELVSESK
133	1::sw|O07621|HEMAT_BACSU	Heme-based aerotactic transducer HemAT OS=Bacillus subtilis (strain 168) GN=hemAT PE=1 SV=1	719	48738	58.75	DVNELVSESK
133	1::sw|O07621|HEMAT_BACSU	Heme-based aerotactic transducer HemAT OS=Bacillus subtilis (strain 168) GN=hemAT PE=1 SV=1	719	48738	20.09	IDTSLVQIEK
133	1::sw|O07621|HEMAT_BACSU	Heme-based aerotactic transducer HemAT OS=Bacillus subtilis (strain 168) GN=hemAT PE=1 SV=1	719	48738	18.76	IDTSLVQIEK
133	1::sw|O07621|HEMAT_BACSU	Heme-based aerotactic transducer HemAT OS=Bacillus subtilis (strain 168) GN=hemAT PE=1 SV=1	719	48738	18.2	IDTSLVQIEK
133	1::sw|O07621|HEMAT_BACSU	Heme-based aerotactic transducer HemAT OS=Bacillus subtilis (strain 168) GN=hemAT PE=1 SV=1	719	48738	21	IDTSLVQIEK
133	1::sw|O07621|HEMAT_BACSU	Heme-based aerotactic transducer HemAT OS=Bacillus subtilis (strain 168) GN=hemAT PE=1 SV=1	719	48738	20.93	IDTSLVQIEK
133	1::sw|O07621|HEMAT_BACSU	Heme-based aerotactic transducer HemAT OS=Bacillus subtilis (strain 168) GN=hemAT PE=1 SV=1	719	48738	22.83	IDTSLVQIEK
133	1::sw|O07621|HEMAT_BACSU	Heme-based aerotactic transducer HemAT OS=Bacillus subtilis (strain 168) GN=hemAT PE=1 SV=1	719	48738	20.72	IDTSLVQIEK
133	1::sw|O07621|HEMAT_BACSU	Heme-based aerotactic transducer HemAT OS=Bacillus subtilis (strain 168) GN=hemAT PE=1 SV=1	719	48738	77.69	IDTSLVQIEK
133	1::sw|O07621|HEMAT_BACSU	Heme-based aerotactic transducer HemAT OS=Bacillus subtilis (strain 168) GN=hemAT PE=1 SV=1	719	48738	36.09	LDEIAQQIEK
133	1::sw|O07621|HEMAT_BACSU	Heme-based aerotactic transducer HemAT OS=Bacillus subtilis (strain 168) GN=hemAT PE=1 SV=1	719	48738	61.84	LDEIAQQIEK
133	1::sw|O07621|HEMAT_BACSU	Heme-based aerotactic transducer HemAT OS=Bacillus subtilis (strain 168) GN=hemAT PE=1 SV=1	719	48738	61.07	LDEIAQQIEK
133	1::sw|O07621|HEMAT_BACSU	Heme-based aerotactic transducer HemAT OS=Bacillus subtilis (strain 168) GN=hemAT PE=1 SV=1	719	48738	56.6	LDEIAQQIEK
133	1::sw|O07621|HEMAT_BACSU	Heme-based aerotactic transducer HemAT OS=Bacillus subtilis (strain 168) GN=hemAT PE=1 SV=1	719	48738	23.5	AGTVTSSTVEEK
133	1::sw|O07621|HEMAT_BACSU	Heme-based aerotactic transducer HemAT OS=Bacillus subtilis (strain 168) GN=hemAT PE=1 SV=1	719	48738	27	AGTVTSSTVEEK
133	1::sw|O07621|HEMAT_BACSU	Heme-based aerotactic transducer HemAT OS=Bacillus subtilis (strain 168) GN=hemAT PE=1 SV=1	719	48738	36.41	AGTVTSSTVEEK
133	1::sw|O07621|HEMAT_BACSU	Heme-based aerotactic transducer HemAT OS=Bacillus subtilis (strain 168) GN=hemAT PE=1 SV=1	719	48738	28.93	LFDEIVHSMK
133	1::sw|O07621|HEMAT_BACSU	Heme-based aerotactic transducer HemAT OS=Bacillus subtilis (strain 168) GN=hemAT PE=1 SV=1	719	48738	27.83	LFDEIVHSMK	Oxidation (M)
133	1::sw|O07621|HEMAT_BACSU	Heme-based aerotactic transducer HemAT OS=Bacillus subtilis (strain 168) GN=hemAT PE=1 SV=1	719	48738	85.12	IQETSGSIANLFSETSR
133	1::sw|O07621|HEMAT_BACSU	Heme-based aerotactic transducer HemAT OS=Bacillus subtilis (strain 168) GN=hemAT PE=1 SV=1	719	48738	56.01	IDVDLQAFLGGLQEVSR
133	1::sw|O07621|HEMAT_BACSU	Heme-based aerotactic transducer HemAT OS=Bacillus subtilis (strain 168) GN=hemAT PE=1 SV=1	719	48738	61.39	HIQEMFAGVIDDEFIEK
133	1::sw|O07621|HEMAT_BACSU	Heme-based aerotactic transducer HemAT OS=Bacillus subtilis (strain 168) GN=hemAT PE=1 SV=1	719	48738	37.35	NLDHESSLMDIINDHSSVDR
102	1::sw|O07631|TYPA_BACSU	GTP-binding protein TypA/BipA homolog OS=Bacillus subtilis (strain 168) GN=typA PE=3 SV=1	907	68574	20.16	IFGFQGLK
102	1::sw|O07631|TYPA_BACSU	GTP-binding protein TypA/BipA homolog OS=Bacillus subtilis (strain 168) GN=typA PE=3 SV=1	907	68574	23.15	IFGFQGLK
102	1::sw|O07631|TYPA_BACSU	GTP-binding protein TypA/BipA homolog OS=Bacillus subtilis (strain 168) GN=typA PE=3 SV=1	907	68574	43.79	ANEQVAER
102	1::sw|O07631|TYPA_BACSU	GTP-binding protein TypA/BipA homolog OS=Bacillus subtilis (strain 168) GN=typA PE=3 SV=1	907	68574	54.38	ANEQVAER
102	1::sw|O07631|TYPA_BACSU	GTP-binding protein TypA/BipA homolog OS=Bacillus subtilis (strain 168) GN=typA PE=3 SV=1	907	68574	54.24	ANEQVAER
102	1::sw|O07631|TYPA_BACSU	GTP-binding protein TypA/BipA homolog OS=Bacillus subtilis (strain 168) GN=typA PE=3 SV=1	907	68574	29.26	LIFTVPSR
102	1::sw|O07631|TYPA_BACSU	GTP-binding protein TypA/BipA homolog OS=Bacillus subtilis (strain 168) GN=typA PE=3 SV=1	907	68574	34.71	RVEIEEAK
102	1::sw|O07631|TYPA_BACSU	GTP-binding protein TypA/BipA homolog OS=Bacillus subtilis (strain 168) GN=typA PE=3 SV=1	907	68574	23.81	RVEIEEAK
102	1::sw|O07631|TYPA_BACSU	GTP-binding protein TypA/BipA homolog OS=Bacillus subtilis (strain 168) GN=typA PE=3 SV=1	907	68574	65.13	VGQQVSLMK
102	1::sw|O07631|TYPA_BACSU	GTP-binding protein TypA/BipA homolog OS=Bacillus subtilis (strain 168) GN=typA PE=3 SV=1	907	68574	86.21	VGQQVSLMK
102	1::sw|O07631|TYPA_BACSU	GTP-binding protein TypA/BipA homolog OS=Bacillus subtilis (strain 168) GN=typA PE=3 SV=1	907	68574	27.21	AMDSNDLER
102	1::sw|O07631|TYPA_BACSU	GTP-binding protein TypA/BipA homolog OS=Bacillus subtilis (strain 168) GN=typA PE=3 SV=1	907	68574	45.63	DNDLVVNVSK
102	1::sw|O07631|TYPA_BACSU	GTP-binding protein TypA/BipA homolog OS=Bacillus subtilis (strain 168) GN=typA PE=3 SV=1	907	68574	62.2	DNDLVVNVSK
102	1::sw|O07631|TYPA_BACSU	GTP-binding protein TypA/BipA homolog OS=Bacillus subtilis (strain 168) GN=typA PE=3 SV=1	907	68574	49.53	DNDLVVNVSK
102	1::sw|O07631|TYPA_BACSU	GTP-binding protein TypA/BipA homolog OS=Bacillus subtilis (strain 168) GN=typA PE=3 SV=1	907	68574	49.18	DNDLVVNVSK
102	1::sw|O07631|TYPA_BACSU	GTP-binding protein TypA/BipA homolog OS=Bacillus subtilis (strain 168) GN=typA PE=3 SV=1	907	68574	30.21	ATSYGIQGIEDR
102	1::sw|O07631|TYPA_BACSU	GTP-binding protein TypA/BipA homolog OS=Bacillus subtilis (strain 168) GN=typA PE=3 SV=1	907	68574	58.14	ATSYGIQGIEDR
102	1::sw|O07631|TYPA_BACSU	GTP-binding protein TypA/BipA homolog OS=Bacillus subtilis (strain 168) GN=typA PE=3 SV=1	907	68574	60.58	ATSYGIQGIEDR
102	1::sw|O07631|TYPA_BACSU	GTP-binding protein TypA/BipA homolog OS=Bacillus subtilis (strain 168) GN=typA PE=3 SV=1	907	68574	69.6	LQSQLQTDVSLR
102	1::sw|O07631|TYPA_BACSU	GTP-binding protein TypA/BipA homolog OS=Bacillus subtilis (strain 168) GN=typA PE=3 SV=1	907	68574	62.11	LQSQLQTDVSLR
102	1::sw|O07631|TYPA_BACSU	GTP-binding protein TypA/BipA homolog OS=Bacillus subtilis (strain 168) GN=typA PE=3 SV=1	907	68574	70.76	ALEQNLNPVVVVNK
102	1::sw|O07631|TYPA_BACSU	GTP-binding protein TypA/BipA homolog OS=Bacillus subtilis (strain 168) GN=typA PE=3 SV=1	907	68574	71.58	ALEQNLNPVVVVNK
102	1::sw|O07631|TYPA_BACSU	GTP-binding protein TypA/BipA homolog OS=Bacillus subtilis (strain 168) GN=typA PE=3 SV=1	907	68574	42.42	GLIGYSTEFLSLTR
102	1::sw|O07631|TYPA_BACSU	GTP-binding protein TypA/BipA homolog OS=Bacillus subtilis (strain 168) GN=typA PE=3 SV=1	907	68574	74.14	GLIGYSTEFLSLTR
102	1::sw|O07631|TYPA_BACSU	GTP-binding protein TypA/BipA homolog OS=Bacillus subtilis (strain 168) GN=typA PE=3 SV=1	907	68574	46.57	VEPTASPDAWVVSGR
102	1::sw|O07631|TYPA_BACSU	GTP-binding protein TypA/BipA homolog OS=Bacillus subtilis (strain 168) GN=typA PE=3 SV=1	907	68574	93.54	TTLVDQLLHQAGTFR
102	1::sw|O07631|TYPA_BACSU	GTP-binding protein TypA/BipA homolog OS=Bacillus subtilis (strain 168) GN=typA PE=3 SV=1	907	68574	74.21	TTLVDQLLHQAGTFR
102	1::sw|O07631|TYPA_BACSU	GTP-binding protein TypA/BipA homolog OS=Bacillus subtilis (strain 168) GN=typA PE=3 SV=1	907	68574	19.79	INILDTPGHADFGGEVER
102	1::sw|O07631|TYPA_BACSU	GTP-binding protein TypA/BipA homolog OS=Bacillus subtilis (strain 168) GN=typA PE=3 SV=1	907	68574	49.78	INILDTPGHADFGGEVER
765	1::sw|O07632|YLAH_BACSU	Uncharacterized membrane protein YlaH OS=Bacillus subtilis (strain 168) GN=ylaH PE=4 SV=1	65	11610	65.11	LSFFAALYQVDR
1042	1::sw|O07634|YLAJ_BACSU	Uncharacterized lipoprotein YlaJ OS=Bacillus subtilis (strain 168) GN=ylaJ PE=4 SV=1	27	23427	27.12	HLVSVAEK
246	1::sw|O30509|GATB_BACSU	Aspartyl/glutamyl-tRNA(Asn/Gln) amidotransferase subunit B OS=Bacillus subtilis (strain 168) GN=gatB PE=1 SV=2	376	53691	26.82	MEEGSLR
246	1::sw|O30509|GATB_BACSU	Aspartyl/glutamyl-tRNA(Asn/Gln) amidotransferase subunit B OS=Bacillus subtilis (strain 168) GN=gatB PE=1 SV=2	376	53691	25.91	ILLEEIK
246	1::sw|O30509|GATB_BACSU	Aspartyl/glutamyl-tRNA(Asn/Gln) amidotransferase subunit B OS=Bacillus subtilis (strain 168) GN=gatB PE=1 SV=2	376	53691	37.11	EAVEFAMK
246	1::sw|O30509|GATB_BACSU	Aspartyl/glutamyl-tRNA(Asn/Gln) amidotransferase subunit B OS=Bacillus subtilis (strain 168) GN=gatB PE=1 SV=2	376	53691	47.93	LHLEEDAGK
246	1::sw|O30509|GATB_BACSU	Aspartyl/glutamyl-tRNA(Asn/Gln) amidotransferase subunit B OS=Bacillus subtilis (strain 168) GN=gatB PE=1 SV=2	376	53691	45.84	GQANPPMVNK
246	1::sw|O30509|GATB_BACSU	Aspartyl/glutamyl-tRNA(Asn/Gln) amidotransferase subunit B OS=Bacillus subtilis (strain 168) GN=gatB PE=1 SV=2	376	53691	26.62	VKEGSDDYR
246	1::sw|O30509|GATB_BACSU	Aspartyl/glutamyl-tRNA(Asn/Gln) amidotransferase subunit B OS=Bacillus subtilis (strain 168) GN=gatB PE=1 SV=2	376	53691	20.47	ASIPELPDER
246	1::sw|O30509|GATB_BACSU	Aspartyl/glutamyl-tRNA(Asn/Gln) amidotransferase subunit B OS=Bacillus subtilis (strain 168) GN=gatB PE=1 SV=2	376	53691	43.14	NLNSFAFVQK
246	1::sw|O30509|GATB_BACSU	Aspartyl/glutamyl-tRNA(Asn/Gln) amidotransferase subunit B OS=Bacillus subtilis (strain 168) GN=gatB PE=1 SV=2	376	53691	48.72	AIGFLVGQIMK
246	1::sw|O30509|GATB_BACSU	Aspartyl/glutamyl-tRNA(Asn/Gln) amidotransferase subunit B OS=Bacillus subtilis (strain 168) GN=gatB PE=1 SV=2	376	53691	50.51	TPEEAYAYLEK
246	1::sw|O30509|GATB_BACSU	Aspartyl/glutamyl-tRNA(Asn/Gln) amidotransferase subunit B OS=Bacillus subtilis (strain 168) GN=gatB PE=1 SV=2	376	53691	67.98	SIIQYTGVSDCK
246	1::sw|O30509|GATB_BACSU	Aspartyl/glutamyl-tRNA(Asn/Gln) amidotransferase subunit B OS=Bacillus subtilis (strain 168) GN=gatB PE=1 SV=2	376	53691	102.47	AAMALNCEIATDTK
246	1::sw|O30509|GATB_BACSU	Aspartyl/glutamyl-tRNA(Asn/Gln) amidotransferase subunit B OS=Bacillus subtilis (strain 168) GN=gatB PE=1 SV=2	376	53691	49.32	QGTPLVEIVSEPDIR
246	1::sw|O30509|GATB_BACSU	Aspartyl/glutamyl-tRNA(Asn/Gln) amidotransferase subunit B OS=Bacillus subtilis (strain 168) GN=gatB PE=1 SV=2	376	53691	23.81	LTHTGDGYSLVDFNR
246	1::sw|O30509|GATB_BACSU	Aspartyl/glutamyl-tRNA(Asn/Gln) amidotransferase subunit B OS=Bacillus subtilis (strain 168) GN=gatB PE=1 SV=2	376	53691	47.3	ELADVALTPEGLAGMIK
1100	1::sw|O30601|YOSP_BACSU	SPBc2 prophage-derived ribonucleoside-diphosphate reductase subunit beta OS=Bacillus subtilis (strain 168) GN=yosP PE=3 SV=1	21	38213	19.14	NDEISLFK
1100	1::sw|O30601|YOSP_BACSU	SPBc2 prophage-derived ribonucleoside-diphosphate reductase subunit beta OS=Bacillus subtilis (strain 168) GN=yosP PE=3 SV=1	21	38213	20.97	IYDAANWSK
900	1::sw|O31423|SKFB_BACSU	Uncharacterized protein SkfB OS=Bacillus subtilis (strain 168) GN=skfB PE=2 SV=2	44	46296	44.5	IELSEPDLPFQK
197	1::sw|O31425|SKFC_BACSU	Sporulation-killing factor biosynthesis protein SkfC OS=Bacillus subtilis (strain 168) GN=skfC PE=2 SV=2	473	56541	29.18	KEEDFR
197	1::sw|O31425|SKFC_BACSU	Sporulation-killing factor biosynthesis protein SkfC OS=Bacillus subtilis (strain 168) GN=skfC PE=2 SV=2	473	56541	41.32	ISPELSNR
197	1::sw|O31425|SKFC_BACSU	Sporulation-killing factor biosynthesis protein SkfC OS=Bacillus subtilis (strain 168) GN=skfC PE=2 SV=2	473	56541	27.5	ISPELSNR
197	1::sw|O31425|SKFC_BACSU	Sporulation-killing factor biosynthesis protein SkfC OS=Bacillus subtilis (strain 168) GN=skfC PE=2 SV=2	473	56541	21.52	ISPELSNR
197	1::sw|O31425|SKFC_BACSU	Sporulation-killing factor biosynthesis protein SkfC OS=Bacillus subtilis (strain 168) GN=skfC PE=2 SV=2	473	56541	21.88	LHHLGILK
197	1::sw|O31425|SKFC_BACSU	Sporulation-killing factor biosynthesis protein SkfC OS=Bacillus subtilis (strain 168) GN=skfC PE=2 SV=2	473	56541	55.42	VTVELQGGR
197	1::sw|O31425|SKFC_BACSU	Sporulation-killing factor biosynthesis protein SkfC OS=Bacillus subtilis (strain 168) GN=skfC PE=2 SV=2	473	56541	33.27	EISIQFIK
197	1::sw|O31425|SKFC_BACSU	Sporulation-killing factor biosynthesis protein SkfC OS=Bacillus subtilis (strain 168) GN=skfC PE=2 SV=2	473	56541	35.07	EISIQFIK
197	1::sw|O31425|SKFC_BACSU	Sporulation-killing factor biosynthesis protein SkfC OS=Bacillus subtilis (strain 168) GN=skfC PE=2 SV=2	473	56541	35.03	TVFLSGFTFR
197	1::sw|O31425|SKFC_BACSU	Sporulation-killing factor biosynthesis protein SkfC OS=Bacillus subtilis (strain 168) GN=skfC PE=2 SV=2	473	56541	46.98	TVFLSGFTFR
197	1::sw|O31425|SKFC_BACSU	Sporulation-killing factor biosynthesis protein SkfC OS=Bacillus subtilis (strain 168) GN=skfC PE=2 SV=2	473	56541	29.58	TVFLSGFTFR
197	1::sw|O31425|SKFC_BACSU	Sporulation-killing factor biosynthesis protein SkfC OS=Bacillus subtilis (strain 168) GN=skfC PE=2 SV=2	473	56541	41.27	TVFLSGFTFR
197	1::sw|O31425|SKFC_BACSU	Sporulation-killing factor biosynthesis protein SkfC OS=Bacillus subtilis (strain 168) GN=skfC PE=2 SV=2	473	56541	46.98	FEQVSPETLK
197	1::sw|O31425|SKFC_BACSU	Sporulation-killing factor biosynthesis protein SkfC OS=Bacillus subtilis (strain 168) GN=skfC PE=2 SV=2	473	56541	21.06	FEQVSPETLK
197	1::sw|O31425|SKFC_BACSU	Sporulation-killing factor biosynthesis protein SkfC OS=Bacillus subtilis (strain 168) GN=skfC PE=2 SV=2	473	56541	19.37	FEQVSPETLK
197	1::sw|O31425|SKFC_BACSU	Sporulation-killing factor biosynthesis protein SkfC OS=Bacillus subtilis (strain 168) GN=skfC PE=2 SV=2	473	56541	18.71	FEQVSPETLK
197	1::sw|O31425|SKFC_BACSU	Sporulation-killing factor biosynthesis protein SkfC OS=Bacillus subtilis (strain 168) GN=skfC PE=2 SV=2	473	56541	43.19	FEQVSPETLK
197	1::sw|O31425|SKFC_BACSU	Sporulation-killing factor biosynthesis protein SkfC OS=Bacillus subtilis (strain 168) GN=skfC PE=2 SV=2	473	56541	50.64	FEQVSPETLK
197	1::sw|O31425|SKFC_BACSU	Sporulation-killing factor biosynthesis protein SkfC OS=Bacillus subtilis (strain 168) GN=skfC PE=2 SV=2	473	56541	21.37	FEQVSPETLK
197	1::sw|O31425|SKFC_BACSU	Sporulation-killing factor biosynthesis protein SkfC OS=Bacillus subtilis (strain 168) GN=skfC PE=2 SV=2	473	56541	19.61	LMASPDGLWSR
197	1::sw|O31425|SKFC_BACSU	Sporulation-killing factor biosynthesis protein SkfC OS=Bacillus subtilis (strain 168) GN=skfC PE=2 SV=2	473	56541	20.32	LMASPDGLWSR	Oxidation (M)
197	1::sw|O31425|SKFC_BACSU	Sporulation-killing factor biosynthesis protein SkfC OS=Bacillus subtilis (strain 168) GN=skfC PE=2 SV=2	473	56541	37.85	EITFFYADVPK
197	1::sw|O31425|SKFC_BACSU	Sporulation-killing factor biosynthesis protein SkfC OS=Bacillus subtilis (strain 168) GN=skfC PE=2 SV=2	473	56541	19.74	EITFFYADVPK
197	1::sw|O31425|SKFC_BACSU	Sporulation-killing factor biosynthesis protein SkfC OS=Bacillus subtilis (strain 168) GN=skfC PE=2 SV=2	473	56541	39.69	FKPPTIASLLLSK
197	1::sw|O31425|SKFC_BACSU	Sporulation-killing factor biosynthesis protein SkfC OS=Bacillus subtilis (strain 168) GN=skfC PE=2 SV=2	473	56541	86.35	VLYDVGLVESWR
197	1::sw|O31425|SKFC_BACSU	Sporulation-killing factor biosynthesis protein SkfC OS=Bacillus subtilis (strain 168) GN=skfC PE=2 SV=2	473	56541	67.08	VLYDVGLVESWR
197	1::sw|O31425|SKFC_BACSU	Sporulation-killing factor biosynthesis protein SkfC OS=Bacillus subtilis (strain 168) GN=skfC PE=2 SV=2	473	56541	71.6	VLYDVGLVESWR
197	1::sw|O31425|SKFC_BACSU	Sporulation-killing factor biosynthesis protein SkfC OS=Bacillus subtilis (strain 168) GN=skfC PE=2 SV=2	473	56541	25.15	FVHQNQSFVVGVNANR
968	1::sw|O31427|SKFE_BACSU	SkfA peptide export ATP-binding protein SkfE OS=Bacillus subtilis (strain 168) GN=skfE PE=2 SV=1	36	27105	19.82	QWLSNWLK
968	1::sw|O31427|SKFE_BACSU	SkfA peptide export ATP-binding protein SkfE OS=Bacillus subtilis (strain 168) GN=skfE PE=2 SV=1	36	27105	34.66	ANQLCGQLSR
968	1::sw|O31427|SKFE_BACSU	SkfA peptide export ATP-binding protein SkfE OS=Bacillus subtilis (strain 168) GN=skfE PE=2 SV=1	36	27105	21.62	VALIPDQPYLYPALTAAEHIQFR
1015	1::sw|O31428|SKFF_BACSU	Putative bacteriocin-SkfA transport system permease protein SkfF OS=Bacillus subtilis (strain 168) GN=skfF PE=2 SV=2	30	52125	30.27	QFGSGQIIQKPK
877	1::sw|O31430|SKFH_BACSU	Thioredoxin-like protein SkfH OS=Bacillus subtilis (strain 168) GN=skfH PE=2 SV=2	47	16447	47.26	SMEVVLTYALDR
261	1::sw|O31446|YBFF_BACSU	Uncharacterized protein YbfF OS=Bacillus subtilis (strain 168) GN=ybfF PE=4 SV=1	341	35458	37.66	LINTILYK
261	1::sw|O31446|YBFF_BACSU	Uncharacterized protein YbfF OS=Bacillus subtilis (strain 168) GN=ybfF PE=4 SV=1	341	35458	20.26	NDQIVFEK
261	1::sw|O31446|YBFF_BACSU	Uncharacterized protein YbfF OS=Bacillus subtilis (strain 168) GN=ybfF PE=4 SV=1	341	35458	48.82	DNAMLSQLK
261	1::sw|O31446|YBFF_BACSU	Uncharacterized protein YbfF OS=Bacillus subtilis (strain 168) GN=ybfF PE=4 SV=1	341	35458	36.24	ELLGYLDTR
261	1::sw|O31446|YBFF_BACSU	Uncharacterized protein YbfF OS=Bacillus subtilis (strain 168) GN=ybfF PE=4 SV=1	341	35458	73.76	GVIDFILTER
261	1::sw|O31446|YBFF_BACSU	Uncharacterized protein YbfF OS=Bacillus subtilis (strain 168) GN=ybfF PE=4 SV=1	341	35458	43.9	GVIDFILTER
261	1::sw|O31446|YBFF_BACSU	Uncharacterized protein YbfF OS=Bacillus subtilis (strain 168) GN=ybfF PE=4 SV=1	341	35458	77.32	GVIDFILTER
261	1::sw|O31446|YBFF_BACSU	Uncharacterized protein YbfF OS=Bacillus subtilis (strain 168) GN=ybfF PE=4 SV=1	341	35458	67.14	MDQQNIQANK
261	1::sw|O31446|YBFF_BACSU	Uncharacterized protein YbfF OS=Bacillus subtilis (strain 168) GN=ybfF PE=4 SV=1	341	35458	24.91	MDQQNIQANK
261	1::sw|O31446|YBFF_BACSU	Uncharacterized protein YbfF OS=Bacillus subtilis (strain 168) GN=ybfF PE=4 SV=1	341	35458	46.65	GQLHTVLHFAQR
261	1::sw|O31446|YBFF_BACSU	Uncharacterized protein YbfF OS=Bacillus subtilis (strain 168) GN=ybfF PE=4 SV=1	341	35458	39.79	GQLHTVLHFAQR
261	1::sw|O31446|YBFF_BACSU	Uncharacterized protein YbfF OS=Bacillus subtilis (strain 168) GN=ybfF PE=4 SV=1	341	35458	54.99	NIAHDINQMQNQQEIIDYLFR
613	1::sw|O31451|YBFJ_BACSU	Uncharacterized protein YbfJ OS=Bacillus subtilis (strain 168) GN=ybfJ PE=4 SV=1	100	14557	38.73	DHAIPLVFKE
613	1::sw|O31451|YBFJ_BACSU	Uncharacterized protein YbfJ OS=Bacillus subtilis (strain 168) GN=ybfJ PE=4 SV=1	100	14557	67.78	GLPVEGVQVTIVK
613	1::sw|O31451|YBFJ_BACSU	Uncharacterized protein YbfJ OS=Bacillus subtilis (strain 168) GN=ybfJ PE=4 SV=1	100	14557	29.77	ETTIPVTLHVEDAK
1023	1::sw|O31461|ILVE1_BACSU	Branched-chain-amino-acid transaminase 1 OS=Bacillus subtilis (strain 168) GN=ilvE PE=1 SV=1	29	39708	29.17	TAGNYAASLQAQR
836	1::sw|O31462|YBGF_BACSU	Uncharacterized amino acid permease YbgF OS=Bacillus subtilis (strain 168) GN=ybgF PE=3 SV=1	52	51139	19.26	TLHPTFAK
836	1::sw|O31462|YBGF_BACSU	Uncharacterized amino acid permease YbgF OS=Bacillus subtilis (strain 168) GN=ybgF PE=3 SV=1	52	51139	28.22	SPFVAVFDR
836	1::sw|O31462|YBGF_BACSU	Uncharacterized amino acid permease YbgF OS=Bacillus subtilis (strain 168) GN=ybgF PE=3 SV=1	52	51139	26.43	SPFVAVFDR
836	1::sw|O31462|YBGF_BACSU	Uncharacterized amino acid permease YbgF OS=Bacillus subtilis (strain 168) GN=ybgF PE=3 SV=1	52	51139	30.47	SQPAADMTHSK
1088	1::sw|O31489|YDCI_BACSU	Uncharacterized protein YdcI OS=Bacillus subtilis (strain 168) GN=ydcI PE=4 SV=2	23	81531	19.23	KIEQSVK
1088	1::sw|O31489|YDCI_BACSU	Uncharacterized protein YdcI OS=Bacillus subtilis (strain 168) GN=ydcI PE=4 SV=2	23	81531	19.01	KIEQSVK
1088	1::sw|O31489|YDCI_BACSU	Uncharacterized protein YdcI OS=Bacillus subtilis (strain 168) GN=ydcI PE=4 SV=2	23	81531	20.95	METSALLK	Oxidation (M)
1088	1::sw|O31489|YDCI_BACSU	Uncharacterized protein YdcI OS=Bacillus subtilis (strain 168) GN=ydcI PE=4 SV=2	23	81531	22.77	INQLALSETAK
796	1::sw|O31500|YERO_BACSU	Uncharacterized HTH-type transcriptional regulator YerO OS=Bacillus subtilis (strain 168) GN=yerO PE=4 SV=1	60	32939	59.94	NALLVSYGEGIER
38	1::sw|O31501|SWRC_BACSU	Swarming motility protein SwrC OS=Bacillus subtilis (strain 168) GN=swrC PE=1 SV=2	1648	113435	26.15	LSDIATIK
38	1::sw|O31501|SWRC_BACSU	Swarming motility protein SwrC OS=Bacillus subtilis (strain 168) GN=swrC PE=1 SV=2	1648	113435	23.42	LSDIATIK
38	1::sw|O31501|SWRC_BACSU	Swarming motility protein SwrC OS=Bacillus subtilis (strain 168) GN=swrC PE=1 SV=2	1648	113435	39.36	EAEGLSTR
38	1::sw|O31501|SWRC_BACSU	Swarming motility protein SwrC OS=Bacillus subtilis (strain 168) GN=swrC PE=1 SV=2	1648	113435	29.3	EAEGLSTR
38	1::sw|O31501|SWRC_BACSU	Swarming motility protein SwrC OS=Bacillus subtilis (strain 168) GN=swrC PE=1 SV=2	1648	113435	29.25	LKDEPLR
38	1::sw|O31501|SWRC_BACSU	Swarming motility protein SwrC OS=Bacillus subtilis (strain 168) GN=swrC PE=1 SV=2	1648	113435	23.17	LKDEPLR
38	1::sw|O31501|SWRC_BACSU	Swarming motility protein SwrC OS=Bacillus subtilis (strain 168) GN=swrC PE=1 SV=2	1648	113435	56.74	DSIGINIVK
38	1::sw|O31501|SWRC_BACSU	Swarming motility protein SwrC OS=Bacillus subtilis (strain 168) GN=swrC PE=1 SV=2	1648	113435	55.87	DSIGINIVK
38	1::sw|O31501|SWRC_BACSU	Swarming motility protein SwrC OS=Bacillus subtilis (strain 168) GN=swrC PE=1 SV=2	1648	113435	27.75	QVEDSLVSK
38	1::sw|O31501|SWRC_BACSU	Swarming motility protein SwrC OS=Bacillus subtilis (strain 168) GN=swrC PE=1 SV=2	1648	113435	33.16	QVEDSLVSK
38	1::sw|O31501|SWRC_BACSU	Swarming motility protein SwrC OS=Bacillus subtilis (strain 168) GN=swrC PE=1 SV=2	1648	113435	58.23	ITSATGQEVK
38	1::sw|O31501|SWRC_BACSU	Swarming motility protein SwrC OS=Bacillus subtilis (strain 168) GN=swrC PE=1 SV=2	1648	113435	53.79	ITSATGQEVK
38	1::sw|O31501|SWRC_BACSU	Swarming motility protein SwrC OS=Bacillus subtilis (strain 168) GN=swrC PE=1 SV=2	1648	113435	29.75	EALLEAGSTR
38	1::sw|O31501|SWRC_BACSU	Swarming motility protein SwrC OS=Bacillus subtilis (strain 168) GN=swrC PE=1 SV=2	1648	113435	45.94	EALLEAGSTR
38	1::sw|O31501|SWRC_BACSU	Swarming motility protein SwrC OS=Bacillus subtilis (strain 168) GN=swrC PE=1 SV=2	1648	113435	44.1	EALLEAGSTR
38	1::sw|O31501|SWRC_BACSU	Swarming motility protein SwrC OS=Bacillus subtilis (strain 168) GN=swrC PE=1 SV=2	1648	113435	51.02	EALLEAGSTR
38	1::sw|O31501|SWRC_BACSU	Swarming motility protein SwrC OS=Bacillus subtilis (strain 168) GN=swrC PE=1 SV=2	1648	113435	43.68	EALLEAGSTR
38	1::sw|O31501|SWRC_BACSU	Swarming motility protein SwrC OS=Bacillus subtilis (strain 168) GN=swrC PE=1 SV=2	1648	113435	47.03	EALLEAGSTR
38	1::sw|O31501|SWRC_BACSU	Swarming motility protein SwrC OS=Bacillus subtilis (strain 168) GN=swrC PE=1 SV=2	1648	113435	51.22	EALLEAGSTR
38	1::sw|O31501|SWRC_BACSU	Swarming motility protein SwrC OS=Bacillus subtilis (strain 168) GN=swrC PE=1 SV=2	1648	113435	47.05	KITSATGQEVK
38	1::sw|O31501|SWRC_BACSU	Swarming motility protein SwrC OS=Bacillus subtilis (strain 168) GN=swrC PE=1 SV=2	1648	113435	55.89	KITSATGQEVK
38	1::sw|O31501|SWRC_BACSU	Swarming motility protein SwrC OS=Bacillus subtilis (strain 168) GN=swrC PE=1 SV=2	1648	113435	40.77	EGSTSDTVSKR
38	1::sw|O31501|SWRC_BACSU	Swarming motility protein SwrC OS=Bacillus subtilis (strain 168) GN=swrC PE=1 SV=2	1648	113435	29.52	EYGLDEDTVK
38	1::sw|O31501|SWRC_BACSU	Swarming motility protein SwrC OS=Bacillus subtilis (strain 168) GN=swrC PE=1 SV=2	1648	113435	18.22	EYGLDEDTVK
38	1::sw|O31501|SWRC_BACSU	Swarming motility protein SwrC OS=Bacillus subtilis (strain 168) GN=swrC PE=1 SV=2	1648	113435	28.24	EYGLDEDTVK
38	1::sw|O31501|SWRC_BACSU	Swarming motility protein SwrC OS=Bacillus subtilis (strain 168) GN=swrC PE=1 SV=2	1648	113435	29.78	EYGLDEDTVK
38	1::sw|O31501|SWRC_BACSU	Swarming motility protein SwrC OS=Bacillus subtilis (strain 168) GN=swrC PE=1 SV=2	1648	113435	22.14	EYGLDEDTVK
38	1::sw|O31501|SWRC_BACSU	Swarming motility protein SwrC OS=Bacillus subtilis (strain 168) GN=swrC PE=1 SV=2	1648	113435	25.84	EYGLDEDTVK
38	1::sw|O31501|SWRC_BACSU	Swarming motility protein SwrC OS=Bacillus subtilis (strain 168) GN=swrC PE=1 SV=2	1648	113435	29.57	YESDTPDFDK
38	1::sw|O31501|SWRC_BACSU	Swarming motility protein SwrC OS=Bacillus subtilis (strain 168) GN=swrC PE=1 SV=2	1648	113435	38.96	VKEGSTSDTVSK
38	1::sw|O31501|SWRC_BACSU	Swarming motility protein SwrC OS=Bacillus subtilis (strain 168) GN=swrC PE=1 SV=2	1648	113435	34.76	VKEGSTSDTVSK
38	1::sw|O31501|SWRC_BACSU	Swarming motility protein SwrC OS=Bacillus subtilis (strain 168) GN=swrC PE=1 SV=2	1648	113435	42.44	VKEGSTSDTVSK
38	1::sw|O31501|SWRC_BACSU	Swarming motility protein SwrC OS=Bacillus subtilis (strain 168) GN=swrC PE=1 SV=2	1648	113435	44.17	VKEGSTSDTVSK
38	1::sw|O31501|SWRC_BACSU	Swarming motility protein SwrC OS=Bacillus subtilis (strain 168) GN=swrC PE=1 SV=2	1648	113435	58.72	VKEGSTSDTVSK
38	1::sw|O31501|SWRC_BACSU	Swarming motility protein SwrC OS=Bacillus subtilis (strain 168) GN=swrC PE=1 SV=2	1648	113435	23.48	SVVVSGDIETIK
38	1::sw|O31501|SWRC_BACSU	Swarming motility protein SwrC OS=Bacillus subtilis (strain 168) GN=swrC PE=1 SV=2	1648	113435	33.96	SVVVSGDIETIK
38	1::sw|O31501|SWRC_BACSU	Swarming motility protein SwrC OS=Bacillus subtilis (strain 168) GN=swrC PE=1 SV=2	1648	113435	55.73	SVVVSGDIETIK
38	1::sw|O31501|SWRC_BACSU	Swarming motility protein SwrC OS=Bacillus subtilis (strain 168) GN=swrC PE=1 SV=2	1648	113435	64.23	SVVVSGDIETIK
38	1::sw|O31501|SWRC_BACSU	Swarming motility protein SwrC OS=Bacillus subtilis (strain 168) GN=swrC PE=1 SV=2	1648	113435	53.17	EAENEAEKAEK
38	1::sw|O31501|SWRC_BACSU	Swarming motility protein SwrC OS=Bacillus subtilis (strain 168) GN=swrC PE=1 SV=2	1648	113435	45.47	EAENEAEKAEK
38	1::sw|O31501|SWRC_BACSU	Swarming motility protein SwrC OS=Bacillus subtilis (strain 168) GN=swrC PE=1 SV=2	1648	113435	35.59	EAENEAEKAEK
38	1::sw|O31501|SWRC_BACSU	Swarming motility protein SwrC OS=Bacillus subtilis (strain 168) GN=swrC PE=1 SV=2	1648	113435	40.2	LKEYGLDEDTVK
38	1::sw|O31501|SWRC_BACSU	Swarming motility protein SwrC OS=Bacillus subtilis (strain 168) GN=swrC PE=1 SV=2	1648	113435	56.32	LKEYGLDEDTVK
38	1::sw|O31501|SWRC_BACSU	Swarming motility protein SwrC OS=Bacillus subtilis (strain 168) GN=swrC PE=1 SV=2	1648	113435	28.89	LKEYGLDEDTVK
38	1::sw|O31501|SWRC_BACSU	Swarming motility protein SwrC OS=Bacillus subtilis (strain 168) GN=swrC PE=1 SV=2	1648	113435	122.01	ANDANTVEVADDVK
38	1::sw|O31501|SWRC_BACSU	Swarming motility protein SwrC OS=Bacillus subtilis (strain 168) GN=swrC PE=1 SV=2	1648	113435	121.83	ANDANTVEVADDVK
38	1::sw|O31501|SWRC_BACSU	Swarming motility protein SwrC OS=Bacillus subtilis (strain 168) GN=swrC PE=1 SV=2	1648	113435	87.87	ANDANTVEVADDVK
38	1::sw|O31501|SWRC_BACSU	Swarming motility protein SwrC OS=Bacillus subtilis (strain 168) GN=swrC PE=1 SV=2	1648	113435	73.05	ANDANTVEVADDVK
38	1::sw|O31501|SWRC_BACSU	Swarming motility protein SwrC OS=Bacillus subtilis (strain 168) GN=swrC PE=1 SV=2	1648	113435	43.3	YESDTPDFDKEK
38	1::sw|O31501|SWRC_BACSU	Swarming motility protein SwrC OS=Bacillus subtilis (strain 168) GN=swrC PE=1 SV=2	1648	113435	43.35	YESDTPDFDKEK
38	1::sw|O31501|SWRC_BACSU	Swarming motility protein SwrC OS=Bacillus subtilis (strain 168) GN=swrC PE=1 SV=2	1648	113435	34.27	YESDTPDFDKEK
38	1::sw|O31501|SWRC_BACSU	Swarming motility protein SwrC OS=Bacillus subtilis (strain 168) GN=swrC PE=1 SV=2	1648	113435	52.11	TMQLTYSPEPGETK
38	1::sw|O31501|SWRC_BACSU	Swarming motility protein SwrC OS=Bacillus subtilis (strain 168) GN=swrC PE=1 SV=2	1648	113435	33.65	TMQLTYSPEPGETK	Oxidation (M)
38	1::sw|O31501|SWRC_BACSU	Swarming motility protein SwrC OS=Bacillus subtilis (strain 168) GN=swrC PE=1 SV=2	1648	113435	37.44	TMQLTYSPEPGETK	Oxidation (M)
38	1::sw|O31501|SWRC_BACSU	Swarming motility protein SwrC OS=Bacillus subtilis (strain 168) GN=swrC PE=1 SV=2	1648	113435	48.69	TMQLTYSPEPGETK	Oxidation (M)
38	1::sw|O31501|SWRC_BACSU	Swarming motility protein SwrC OS=Bacillus subtilis (strain 168) GN=swrC PE=1 SV=2	1648	113435	33.54	TMQLTYSPEPGETK	Oxidation (M)
38	1::sw|O31501|SWRC_BACSU	Swarming motility protein SwrC OS=Bacillus subtilis (strain 168) GN=swrC PE=1 SV=2	1648	113435	47.56	VVDDSIVVIENIYR
38	1::sw|O31501|SWRC_BACSU	Swarming motility protein SwrC OS=Bacillus subtilis (strain 168) GN=swrC PE=1 SV=2	1648	113435	65.38	VVDDSIVVIENIYR
38	1::sw|O31501|SWRC_BACSU	Swarming motility protein SwrC OS=Bacillus subtilis (strain 168) GN=swrC PE=1 SV=2	1648	113435	64.73	VVDDSIVVIENIYR
38	1::sw|O31501|SWRC_BACSU	Swarming motility protein SwrC OS=Bacillus subtilis (strain 168) GN=swrC PE=1 SV=2	1648	113435	23.65	TMQLTYSPEPGETKK
38	1::sw|O31501|SWRC_BACSU	Swarming motility protein SwrC OS=Bacillus subtilis (strain 168) GN=swrC PE=1 SV=2	1648	113435	27.52	TMQLTYSPEPGETKK
38	1::sw|O31501|SWRC_BACSU	Swarming motility protein SwrC OS=Bacillus subtilis (strain 168) GN=swrC PE=1 SV=2	1648	113435	89.54	TEAAEALENVNLPDDAKDPEISR
38	1::sw|O31501|SWRC_BACSU	Swarming motility protein SwrC OS=Bacillus subtilis (strain 168) GN=swrC PE=1 SV=2	1648	113435	72.35	TEAAEALENVNLPDDAKDPEISR
38	1::sw|O31501|SWRC_BACSU	Swarming motility protein SwrC OS=Bacillus subtilis (strain 168) GN=swrC PE=1 SV=2	1648	113435	47.21	LGLTASQISQALMSQTSQEPLTTVK
727	1::sw|O31502|DAGK_BACSU	Diacylglycerol kinase OS=Bacillus subtilis (strain 168) GN=dagK PE=1 SV=1	72	33373	67.12	LTELTYDVPSK
727	1::sw|O31502|DAGK_BACSU	Diacylglycerol kinase OS=Bacillus subtilis (strain 168) GN=dagK PE=1 SV=1	72	33373	24.19	TMLGQLAYYLK
643	1::sw|O31534|HMOA_BACSU	Heme-degrading monooxygenase HmoA OS=Bacillus subtilis (strain 168) GN=hmoA PE=1 SV=2	91	12565	20.09	FSAEGIIEK
643	1::sw|O31534|HMOA_BACSU	Heme-degrading monooxygenase HmoA OS=Bacillus subtilis (strain 168) GN=hmoA PE=1 SV=2	91	12565	54.99	FSAEGIIEK
643	1::sw|O31534|HMOA_BACSU	Heme-degrading monooxygenase HmoA OS=Bacillus subtilis (strain 168) GN=hmoA PE=1 SV=2	91	12565	39.1	RGDEEVVVMIR
643	1::sw|O31534|HMOA_BACSU	Heme-degrading monooxygenase HmoA OS=Bacillus subtilis (strain 168) GN=hmoA PE=1 SV=2	91	12565	40.04	QEGLIDVTVLEK
400	1::sw|O31539|YETJ_BACSU	Uncharacterized protein YetJ OS=Bacillus subtilis (strain 168) GN=yetJ PE=3 SV=1	192	23813	69.88	MQATVHESK
400	1::sw|O31539|YETJ_BACSU	Uncharacterized protein YetJ OS=Bacillus subtilis (strain 168) GN=yetJ PE=3 SV=1	192	23813	59.56	MQATVHESK
400	1::sw|O31539|YETJ_BACSU	Uncharacterized protein YetJ OS=Bacillus subtilis (strain 168) GN=yetJ PE=3 SV=1	192	23813	45.01	MQATVHESK
400	1::sw|O31539|YETJ_BACSU	Uncharacterized protein YetJ OS=Bacillus subtilis (strain 168) GN=yetJ PE=3 SV=1	192	23813	36.23	MQATVHESK
400	1::sw|O31539|YETJ_BACSU	Uncharacterized protein YetJ OS=Bacillus subtilis (strain 168) GN=yetJ PE=3 SV=1	192	23813	51.69	MQATVHESK
400	1::sw|O31539|YETJ_BACSU	Uncharacterized protein YetJ OS=Bacillus subtilis (strain 168) GN=yetJ PE=3 SV=1	192	23813	39.89	MQATVHESK	Oxidation (M)
400	1::sw|O31539|YETJ_BACSU	Uncharacterized protein YetJ OS=Bacillus subtilis (strain 168) GN=yetJ PE=3 SV=1	192	23813	28.23	MQATVHESK	Oxidation (M)
878	1::sw|O31543|YFJQ_BACSU	Putative metal ion transporter YfjQ OS=Bacillus subtilis (strain 168) GN=yfjQ PE=3 SV=1	47	37878	24.85	FYVIHALNK
878	1::sw|O31543|YFJQ_BACSU	Putative metal ion transporter YfjQ OS=Bacillus subtilis (strain 168) GN=yfjQ PE=3 SV=1	47	37878	44.83	DSYVTLNSNR
878	1::sw|O31543|YFJQ_BACSU	Putative metal ion transporter YfjQ OS=Bacillus subtilis (strain 168) GN=yfjQ PE=3 SV=1	47	37878	20.73	AYFSDIYDHLLK
878	1::sw|O31543|YFJQ_BACSU	Putative metal ion transporter YfjQ OS=Bacillus subtilis (strain 168) GN=yfjQ PE=3 SV=1	47	37878	18.79	TYGTLMNEVFDLR
19	1::sw|O31567|YFIY_BACSU	Probable siderophore-binding lipoprotein YfiY OS=Bacillus subtilis (strain 168) GN=yfiY PE=1 SV=1	2790	36339	24.29	EVIADFDK
19	1::sw|O31567|YFIY_BACSU	Probable siderophore-binding lipoprotein YfiY OS=Bacillus subtilis (strain 168) GN=yfiY PE=1 SV=1	2790	36339	21.07	EVIADFDK
19	1::sw|O31567|YFIY_BACSU	Probable siderophore-binding lipoprotein YfiY OS=Bacillus subtilis (strain 168) GN=yfiY PE=1 SV=1	2790	36339	47.1	EVIADFDKR
19	1::sw|O31567|YFIY_BACSU	Probable siderophore-binding lipoprotein YfiY OS=Bacillus subtilis (strain 168) GN=yfiY PE=1 SV=1	2790	36339	53.41	EVIADFDKR
19	1::sw|O31567|YFIY_BACSU	Probable siderophore-binding lipoprotein YfiY OS=Bacillus subtilis (strain 168) GN=yfiY PE=1 SV=1	2790	36339	48.92	EVIADFDKR
19	1::sw|O31567|YFIY_BACSU	Probable siderophore-binding lipoprotein YfiY OS=Bacillus subtilis (strain 168) GN=yfiY PE=1 SV=1	2790	36339	51.44	EVIADFDKR
19	1::sw|O31567|YFIY_BACSU	Probable siderophore-binding lipoprotein YfiY OS=Bacillus subtilis (strain 168) GN=yfiY PE=1 SV=1	2790	36339	54.74	EVIADFDKR
19	1::sw|O31567|YFIY_BACSU	Probable siderophore-binding lipoprotein YfiY OS=Bacillus subtilis (strain 168) GN=yfiY PE=1 SV=1	2790	36339	53.8	EVIADFDKR
19	1::sw|O31567|YFIY_BACSU	Probable siderophore-binding lipoprotein YfiY OS=Bacillus subtilis (strain 168) GN=yfiY PE=1 SV=1	2790	36339	65	EVIADFDKR
19	1::sw|O31567|YFIY_BACSU	Probable siderophore-binding lipoprotein YfiY OS=Bacillus subtilis (strain 168) GN=yfiY PE=1 SV=1	2790	36339	45.53	EVIADFDKR
19	1::sw|O31567|YFIY_BACSU	Probable siderophore-binding lipoprotein YfiY OS=Bacillus subtilis (strain 168) GN=yfiY PE=1 SV=1	2790	36339	51.69	EVIADFDKR
19	1::sw|O31567|YFIY_BACSU	Probable siderophore-binding lipoprotein YfiY OS=Bacillus subtilis (strain 168) GN=yfiY PE=1 SV=1	2790	36339	29.19	EVIADFDKR
19	1::sw|O31567|YFIY_BACSU	Probable siderophore-binding lipoprotein YfiY OS=Bacillus subtilis (strain 168) GN=yfiY PE=1 SV=1	2790	36339	25.96	GDPWYDYLK
19	1::sw|O31567|YFIY_BACSU	Probable siderophore-binding lipoprotein YfiY OS=Bacillus subtilis (strain 168) GN=yfiY PE=1 SV=1	2790	36339	40.99	GDPWYDYLK
19	1::sw|O31567|YFIY_BACSU	Probable siderophore-binding lipoprotein YfiY OS=Bacillus subtilis (strain 168) GN=yfiY PE=1 SV=1	2790	36339	36.8	DQFTFSTDSK
19	1::sw|O31567|YFIY_BACSU	Probable siderophore-binding lipoprotein YfiY OS=Bacillus subtilis (strain 168) GN=yfiY PE=1 SV=1	2790	36339	53.95	DQFTFSTDSK
19	1::sw|O31567|YFIY_BACSU	Probable siderophore-binding lipoprotein YfiY OS=Bacillus subtilis (strain 168) GN=yfiY PE=1 SV=1	2790	36339	62.49	DQFTFSTDSK
19	1::sw|O31567|YFIY_BACSU	Probable siderophore-binding lipoprotein YfiY OS=Bacillus subtilis (strain 168) GN=yfiY PE=1 SV=1	2790	36339	52.2	DQFTFSTDSK
19	1::sw|O31567|YFIY_BACSU	Probable siderophore-binding lipoprotein YfiY OS=Bacillus subtilis (strain 168) GN=yfiY PE=1 SV=1	2790	36339	50.98	DQFTFSTDSK
19	1::sw|O31567|YFIY_BACSU	Probable siderophore-binding lipoprotein YfiY OS=Bacillus subtilis (strain 168) GN=yfiY PE=1 SV=1	2790	36339	42.24	DQFTFSTDSK
19	1::sw|O31567|YFIY_BACSU	Probable siderophore-binding lipoprotein YfiY OS=Bacillus subtilis (strain 168) GN=yfiY PE=1 SV=1	2790	36339	56.57	DQFTFSTDSK
19	1::sw|O31567|YFIY_BACSU	Probable siderophore-binding lipoprotein YfiY OS=Bacillus subtilis (strain 168) GN=yfiY PE=1 SV=1	2790	36339	30.92	DQFTFSTDSK
19	1::sw|O31567|YFIY_BACSU	Probable siderophore-binding lipoprotein YfiY OS=Bacillus subtilis (strain 168) GN=yfiY PE=1 SV=1	2790	36339	53.89	DQFTFSTDSK
19	1::sw|O31567|YFIY_BACSU	Probable siderophore-binding lipoprotein YfiY OS=Bacillus subtilis (strain 168) GN=yfiY PE=1 SV=1	2790	36339	49.71	DQFTFSTDSK
19	1::sw|O31567|YFIY_BACSU	Probable siderophore-binding lipoprotein YfiY OS=Bacillus subtilis (strain 168) GN=yfiY PE=1 SV=1	2790	36339	35.34	DQFTFSTDSK
19	1::sw|O31567|YFIY_BACSU	Probable siderophore-binding lipoprotein YfiY OS=Bacillus subtilis (strain 168) GN=yfiY PE=1 SV=1	2790	36339	46.52	DQFTFSTDSK
19	1::sw|O31567|YFIY_BACSU	Probable siderophore-binding lipoprotein YfiY OS=Bacillus subtilis (strain 168) GN=yfiY PE=1 SV=1	2790	36339	46.59	DQFTFSTDSK
19	1::sw|O31567|YFIY_BACSU	Probable siderophore-binding lipoprotein YfiY OS=Bacillus subtilis (strain 168) GN=yfiY PE=1 SV=1	2790	36339	61.77	DQFTFSTDSK
19	1::sw|O31567|YFIY_BACSU	Probable siderophore-binding lipoprotein YfiY OS=Bacillus subtilis (strain 168) GN=yfiY PE=1 SV=1	2790	36339	52.16	DQFTFSTDSK
19	1::sw|O31567|YFIY_BACSU	Probable siderophore-binding lipoprotein YfiY OS=Bacillus subtilis (strain 168) GN=yfiY PE=1 SV=1	2790	36339	24.4	DQFTFSTDSK
19	1::sw|O31567|YFIY_BACSU	Probable siderophore-binding lipoprotein YfiY OS=Bacillus subtilis (strain 168) GN=yfiY PE=1 SV=1	2790	36339	22.65	DQFTFSTDSK
19	1::sw|O31567|YFIY_BACSU	Probable siderophore-binding lipoprotein YfiY OS=Bacillus subtilis (strain 168) GN=yfiY PE=1 SV=1	2790	36339	90.63	DNLTLYANAVNK
19	1::sw|O31567|YFIY_BACSU	Probable siderophore-binding lipoprotein YfiY OS=Bacillus subtilis (strain 168) GN=yfiY PE=1 SV=1	2790	36339	95.11	DNLTLYANAVNK
19	1::sw|O31567|YFIY_BACSU	Probable siderophore-binding lipoprotein YfiY OS=Bacillus subtilis (strain 168) GN=yfiY PE=1 SV=1	2790	36339	91.01	DNLTLYANAVNK
19	1::sw|O31567|YFIY_BACSU	Probable siderophore-binding lipoprotein YfiY OS=Bacillus subtilis (strain 168) GN=yfiY PE=1 SV=1	2790	36339	74.6	DNLTLYANAVNK
19	1::sw|O31567|YFIY_BACSU	Probable siderophore-binding lipoprotein YfiY OS=Bacillus subtilis (strain 168) GN=yfiY PE=1 SV=1	2790	36339	104.85	DNLTLYANAVNK
19	1::sw|O31567|YFIY_BACSU	Probable siderophore-binding lipoprotein YfiY OS=Bacillus subtilis (strain 168) GN=yfiY PE=1 SV=1	2790	36339	68.25	DNLTLYANAVNK
19	1::sw|O31567|YFIY_BACSU	Probable siderophore-binding lipoprotein YfiY OS=Bacillus subtilis (strain 168) GN=yfiY PE=1 SV=1	2790	36339	98.39	DNLTLYANAVNK
19	1::sw|O31567|YFIY_BACSU	Probable siderophore-binding lipoprotein YfiY OS=Bacillus subtilis (strain 168) GN=yfiY PE=1 SV=1	2790	36339	30.51	QKDQFTFSTDSK
19	1::sw|O31567|YFIY_BACSU	Probable siderophore-binding lipoprotein YfiY OS=Bacillus subtilis (strain 168) GN=yfiY PE=1 SV=1	2790	36339	18.73	QKDQFTFSTDSK
19	1::sw|O31567|YFIY_BACSU	Probable siderophore-binding lipoprotein YfiY OS=Bacillus subtilis (strain 168) GN=yfiY PE=1 SV=1	2790	36339	86.24	HAMGTSDNIPANPK
19	1::sw|O31567|YFIY_BACSU	Probable siderophore-binding lipoprotein YfiY OS=Bacillus subtilis (strain 168) GN=yfiY PE=1 SV=1	2790	36339	88.83	HAMGTSDNIPANPK
19	1::sw|O31567|YFIY_BACSU	Probable siderophore-binding lipoprotein YfiY OS=Bacillus subtilis (strain 168) GN=yfiY PE=1 SV=1	2790	36339	61.02	HAMGTSDNIPANPK
19	1::sw|O31567|YFIY_BACSU	Probable siderophore-binding lipoprotein YfiY OS=Bacillus subtilis (strain 168) GN=yfiY PE=1 SV=1	2790	36339	71.26	HAMGTSDNIPANPK
19	1::sw|O31567|YFIY_BACSU	Probable siderophore-binding lipoprotein YfiY OS=Bacillus subtilis (strain 168) GN=yfiY PE=1 SV=1	2790	36339	81.94	HAMGTSDNIPANPK
19	1::sw|O31567|YFIY_BACSU	Probable siderophore-binding lipoprotein YfiY OS=Bacillus subtilis (strain 168) GN=yfiY PE=1 SV=1	2790	36339	28.36	HAMGTSDNIPANPK
19	1::sw|O31567|YFIY_BACSU	Probable siderophore-binding lipoprotein YfiY OS=Bacillus subtilis (strain 168) GN=yfiY PE=1 SV=1	2790	36339	32.23	HAMGTSDNIPANPK
19	1::sw|O31567|YFIY_BACSU	Probable siderophore-binding lipoprotein YfiY OS=Bacillus subtilis (strain 168) GN=yfiY PE=1 SV=1	2790	36339	28.94	HAMGTSDNIPANPK
19	1::sw|O31567|YFIY_BACSU	Probable siderophore-binding lipoprotein YfiY OS=Bacillus subtilis (strain 168) GN=yfiY PE=1 SV=1	2790	36339	81.87	HAMGTSDNIPANPK	Oxidation (M)
19	1::sw|O31567|YFIY_BACSU	Probable siderophore-binding lipoprotein YfiY OS=Bacillus subtilis (strain 168) GN=yfiY PE=1 SV=1	2790	36339	88.31	HAMGTSDNIPANPK	Oxidation (M)
19	1::sw|O31567|YFIY_BACSU	Probable siderophore-binding lipoprotein YfiY OS=Bacillus subtilis (strain 168) GN=yfiY PE=1 SV=1	2790	36339	55.79	HAMGTSDNIPANPK	Oxidation (M)
19	1::sw|O31567|YFIY_BACSU	Probable siderophore-binding lipoprotein YfiY OS=Bacillus subtilis (strain 168) GN=yfiY PE=1 SV=1	2790	36339	21.94	HAMGTSDNIPANPK	Oxidation (M)
19	1::sw|O31567|YFIY_BACSU	Probable siderophore-binding lipoprotein YfiY OS=Bacillus subtilis (strain 168) GN=yfiY PE=1 SV=1	2790	36339	61.64	HAMGTSDNIPANPK	Oxidation (M)
19	1::sw|O31567|YFIY_BACSU	Probable siderophore-binding lipoprotein YfiY OS=Bacillus subtilis (strain 168) GN=yfiY PE=1 SV=1	2790	36339	33.58	HAMGTSDNIPANPK	Oxidation (M)
19	1::sw|O31567|YFIY_BACSU	Probable siderophore-binding lipoprotein YfiY OS=Bacillus subtilis (strain 168) GN=yfiY PE=1 SV=1	2790	36339	64.68	WANQWTSSSLWK
19	1::sw|O31567|YFIY_BACSU	Probable siderophore-binding lipoprotein YfiY OS=Bacillus subtilis (strain 168) GN=yfiY PE=1 SV=1	2790	36339	49.28	WANQWTSSSLWK
19	1::sw|O31567|YFIY_BACSU	Probable siderophore-binding lipoprotein YfiY OS=Bacillus subtilis (strain 168) GN=yfiY PE=1 SV=1	2790	36339	43.82	WANQWTSSSLWK
19	1::sw|O31567|YFIY_BACSU	Probable siderophore-binding lipoprotein YfiY OS=Bacillus subtilis (strain 168) GN=yfiY PE=1 SV=1	2790	36339	68.6	WANQWTSSSLWK
19	1::sw|O31567|YFIY_BACSU	Probable siderophore-binding lipoprotein YfiY OS=Bacillus subtilis (strain 168) GN=yfiY PE=1 SV=1	2790	36339	42.02	GDPWYDYLKDDMK
19	1::sw|O31567|YFIY_BACSU	Probable siderophore-binding lipoprotein YfiY OS=Bacillus subtilis (strain 168) GN=yfiY PE=1 SV=1	2790	36339	31.36	GDPWYDYLKDDMK
19	1::sw|O31567|YFIY_BACSU	Probable siderophore-binding lipoprotein YfiY OS=Bacillus subtilis (strain 168) GN=yfiY PE=1 SV=1	2790	36339	28.05	GDPWYDYLKDDMK
19	1::sw|O31567|YFIY_BACSU	Probable siderophore-binding lipoprotein YfiY OS=Bacillus subtilis (strain 168) GN=yfiY PE=1 SV=1	2790	36339	22.35	GDPWYDYLKDDMK	Oxidation (M)
19	1::sw|O31567|YFIY_BACSU	Probable siderophore-binding lipoprotein YfiY OS=Bacillus subtilis (strain 168) GN=yfiY PE=1 SV=1	2790	36339	47.49	AANYLLDDIETYFLK
19	1::sw|O31567|YFIY_BACSU	Probable siderophore-binding lipoprotein YfiY OS=Bacillus subtilis (strain 168) GN=yfiY PE=1 SV=1	2790	36339	70.69	AANYLLDDIETYFLK
19	1::sw|O31567|YFIY_BACSU	Probable siderophore-binding lipoprotein YfiY OS=Bacillus subtilis (strain 168) GN=yfiY PE=1 SV=1	2790	36339	76.72	AANYLLDDIETYFLK
19	1::sw|O31567|YFIY_BACSU	Probable siderophore-binding lipoprotein YfiY OS=Bacillus subtilis (strain 168) GN=yfiY PE=1 SV=1	2790	36339	52.47	AANYLLDDIETYFLK
19	1::sw|O31567|YFIY_BACSU	Probable siderophore-binding lipoprotein YfiY OS=Bacillus subtilis (strain 168) GN=yfiY PE=1 SV=1	2790	36339	76.71	AANYLLDDIETYFLK
19	1::sw|O31567|YFIY_BACSU	Probable siderophore-binding lipoprotein YfiY OS=Bacillus subtilis (strain 168) GN=yfiY PE=1 SV=1	2790	36339	68.47	AANYLLDDIETYFLK
19	1::sw|O31567|YFIY_BACSU	Probable siderophore-binding lipoprotein YfiY OS=Bacillus subtilis (strain 168) GN=yfiY PE=1 SV=1	2790	36339	35.18	IVVLTNEGTEALLALGIK
19	1::sw|O31567|YFIY_BACSU	Probable siderophore-binding lipoprotein YfiY OS=Bacillus subtilis (strain 168) GN=yfiY PE=1 SV=1	2790	36339	46.48	IVVLTNEGTEALLALGIK
19	1::sw|O31567|YFIY_BACSU	Probable siderophore-binding lipoprotein YfiY OS=Bacillus subtilis (strain 168) GN=yfiY PE=1 SV=1	2790	36339	52.93	SGNAHEVDDVVWTTAGGIK
19	1::sw|O31567|YFIY_BACSU	Probable siderophore-binding lipoprotein YfiY OS=Bacillus subtilis (strain 168) GN=yfiY PE=1 SV=1	2790	36339	59.11	SGNAHEVDDVVWTTAGGIK
19	1::sw|O31567|YFIY_BACSU	Probable siderophore-binding lipoprotein YfiY OS=Bacillus subtilis (strain 168) GN=yfiY PE=1 SV=1	2790	36339	63.38	SGNAHEVDDVVWTTAGGIK
19	1::sw|O31567|YFIY_BACSU	Probable siderophore-binding lipoprotein YfiY OS=Bacillus subtilis (strain 168) GN=yfiY PE=1 SV=1	2790	36339	34.95	SGNAHEVDDVVWTTAGGIK
19	1::sw|O31567|YFIY_BACSU	Probable siderophore-binding lipoprotein YfiY OS=Bacillus subtilis (strain 168) GN=yfiY PE=1 SV=1	2790	36339	23.66	SGNAHEVDDVVWTTAGGIK
19	1::sw|O31567|YFIY_BACSU	Probable siderophore-binding lipoprotein YfiY OS=Bacillus subtilis (strain 168) GN=yfiY PE=1 SV=1	2790	36339	58.48	ESIPDMDADVLFYFTYK
19	1::sw|O31567|YFIY_BACSU	Probable siderophore-binding lipoprotein YfiY OS=Bacillus subtilis (strain 168) GN=yfiY PE=1 SV=1	2790	36339	44.1	ESIPDMDADVLFYFTYK
19	1::sw|O31567|YFIY_BACSU	Probable siderophore-binding lipoprotein YfiY OS=Bacillus subtilis (strain 168) GN=yfiY PE=1 SV=1	2790	36339	48.19	IYYTDSFPGIILDQLGFK
19	1::sw|O31567|YFIY_BACSU	Probable siderophore-binding lipoprotein YfiY OS=Bacillus subtilis (strain 168) GN=yfiY PE=1 SV=1	2790	36339	55.51	IYYTDSFPGIILDQLGFK
19	1::sw|O31567|YFIY_BACSU	Probable siderophore-binding lipoprotein YfiY OS=Bacillus subtilis (strain 168) GN=yfiY PE=1 SV=1	2790	36339	51.28	IYYTDSFPGIILDQLGFK
19	1::sw|O31567|YFIY_BACSU	Probable siderophore-binding lipoprotein YfiY OS=Bacillus subtilis (strain 168) GN=yfiY PE=1 SV=1	2790	36339	31.93	IYYTDSFPGIILDQLGFK
19	1::sw|O31567|YFIY_BACSU	Probable siderophore-binding lipoprotein YfiY OS=Bacillus subtilis (strain 168) GN=yfiY PE=1 SV=1	2790	36339	50.06	IYYTDSFPGIILDQLGFK
19	1::sw|O31567|YFIY_BACSU	Probable siderophore-binding lipoprotein YfiY OS=Bacillus subtilis (strain 168) GN=yfiY PE=1 SV=1	2790	36339	31.85	IVVLTNEGTEALLALGIKPVGAVK
19	1::sw|O31567|YFIY_BACSU	Probable siderophore-binding lipoprotein YfiY OS=Bacillus subtilis (strain 168) GN=yfiY PE=1 SV=1	2790	36339	30.32	IVVLTNEGTEALLALGIKPVGAVK
19	1::sw|O31567|YFIY_BACSU	Probable siderophore-binding lipoprotein YfiY OS=Bacillus subtilis (strain 168) GN=yfiY PE=1 SV=1	2790	36339	25.33	IVVLTNEGTEALLALGIKPVGAVK
19	1::sw|O31567|YFIY_BACSU	Probable siderophore-binding lipoprotein YfiY OS=Bacillus subtilis (strain 168) GN=yfiY PE=1 SV=1	2790	36339	20.56	IVVLTNEGTEALLALGIKPVGAVK
19	1::sw|O31567|YFIY_BACSU	Probable siderophore-binding lipoprotein YfiY OS=Bacillus subtilis (strain 168) GN=yfiY PE=1 SV=1	2790	36339	47.12	IVVLTNEGTEALLALGIKPVGAVK
19	1::sw|O31567|YFIY_BACSU	Probable siderophore-binding lipoprotein YfiY OS=Bacillus subtilis (strain 168) GN=yfiY PE=1 SV=1	2790	36339	39.96	IVVLTNEGTEALLALGIKPVGAVK
19	1::sw|O31567|YFIY_BACSU	Probable siderophore-binding lipoprotein YfiY OS=Bacillus subtilis (strain 168) GN=yfiY PE=1 SV=1	2790	36339	30.89	IVVLTNEGTEALLALGIKPVGAVK
19	1::sw|O31567|YFIY_BACSU	Probable siderophore-binding lipoprotein YfiY OS=Bacillus subtilis (strain 168) GN=yfiY PE=1 SV=1	2790	36339	42.89	IVVLTNEGTEALLALGIKPVGAVK
19	1::sw|O31567|YFIY_BACSU	Probable siderophore-binding lipoprotein YfiY OS=Bacillus subtilis (strain 168) GN=yfiY PE=1 SV=1	2790	36339	44.74	IVVLTNEGTEALLALGIKPVGAVK
19	1::sw|O31567|YFIY_BACSU	Probable siderophore-binding lipoprotein YfiY OS=Bacillus subtilis (strain 168) GN=yfiY PE=1 SV=1	2790	36339	32.67	NVGLETEPNVEAIAELKPDLIIGNK
19	1::sw|O31567|YFIY_BACSU	Probable siderophore-binding lipoprotein YfiY OS=Bacillus subtilis (strain 168) GN=yfiY PE=1 SV=1	2790	36339	25.95	NVGLETEPNVEAIAELKPDLIIGNK
19	1::sw|O31567|YFIY_BACSU	Probable siderophore-binding lipoprotein YfiY OS=Bacillus subtilis (strain 168) GN=yfiY PE=1 SV=1	2790	36339	27.87	NVGLETEPNVEAIAELKPDLIIGNK
677	1::sw|O31568|YFIZ_BACSU	Probable siderophore transport system permease protein YfiZ OS=Bacillus subtilis (strain 168) GN=yfiZ PE=1 SV=1	83	35454	37.86	INLLVMGEDVAK
677	1::sw|O31568|YFIZ_BACSU	Probable siderophore transport system permease protein YfiZ OS=Bacillus subtilis (strain 168) GN=yfiZ PE=1 SV=1	83	35454	42.1	INLLVMGEDVAK
677	1::sw|O31568|YFIZ_BACSU	Probable siderophore transport system permease protein YfiZ OS=Bacillus subtilis (strain 168) GN=yfiZ PE=1 SV=1	83	35454	39.98	ALVATVVGASLAAAGALMQALTK
609	1::sw|O31569|YFHA_BACSU	Probable siderophore transport system permease protein YfhA OS=Bacillus subtilis (strain 168) GN=yfhA PE=1 SV=1	101	36160	46.04	LDELMIMSFR
609	1::sw|O31569|YFHA_BACSU	Probable siderophore transport system permease protein YfhA OS=Bacillus subtilis (strain 168) GN=yfhA PE=1 SV=1	101	36160	74.1	LDELMIMSFR
1060	1::sw|O31571|YFHC_BACSU	Putative NAD(P)H nitroreductase YfhC OS=Bacillus subtilis (strain 168) GN=yfhC PE=3 SV=1	25	22441	25.4	FIYVSSETGK
839	1::sw|O31580|YFHL_BACSU	Uncharacterized protein YfhL OS=Bacillus subtilis (strain 168) GN=yfhL PE=4 SV=1	52	12052	20.11	IMTHSQGGDR
839	1::sw|O31580|YFHL_BACSU	Uncharacterized protein YfhL OS=Bacillus subtilis (strain 168) GN=yfhL PE=4 SV=1	52	12052	36.43	IMTHSQGGDR
839	1::sw|O31580|YFHL_BACSU	Uncharacterized protein YfhL OS=Bacillus subtilis (strain 168) GN=yfhL PE=4 SV=1	52	12052	37.42	IMTHSQGGDR
622	1::sw|O31581|YFHM_BACSU	AB hydrolase superfamily protein YfhM OS=Bacillus subtilis (strain 168) GN=yfhM PE=3 SV=1	98	32852	41.89	QPGALTAMLNWYR
622	1::sw|O31581|YFHM_BACSU	AB hydrolase superfamily protein YfhM OS=Bacillus subtilis (strain 168) GN=yfhM PE=3 SV=1	98	32852	42.47	GYNLSDKPEGIDSYR
622	1::sw|O31581|YFHM_BACSU	AB hydrolase superfamily protein YfhM OS=Bacillus subtilis (strain 168) GN=yfhM PE=3 SV=1	98	32852	22.36	AIGLSDRPALFTSEDVSR
622	1::sw|O31581|YFHM_BACSU	AB hydrolase superfamily protein YfhM OS=Bacillus subtilis (strain 168) GN=yfhM PE=3 SV=1	98	32852	50.33	IDTLRDDIIGLITQFTDEK
648	1::sw|O31582|YFHO_BACSU	Uncharacterized protein YfhO OS=Bacillus subtilis (strain 168) GN=yfhO PE=4 SV=2	90	98424	19.65	VNDYVTTR
648	1::sw|O31582|YFHO_BACSU	Uncharacterized protein YfhO OS=Bacillus subtilis (strain 168) GN=yfhO PE=4 SV=2	90	98424	22.29	VNDYVTTR
648	1::sw|O31582|YFHO_BACSU	Uncharacterized protein YfhO OS=Bacillus subtilis (strain 168) GN=yfhO PE=4 SV=2	90	98424	38.72	ANLYSLLYGK
648	1::sw|O31582|YFHO_BACSU	Uncharacterized protein YfhO OS=Bacillus subtilis (strain 168) GN=yfhO PE=4 SV=2	90	98424	71.87	TADAIYSESELDR
588	1::sw|O31593|YHBJ_BACSU	Putative efflux system component YhbJ OS=Bacillus subtilis (strain 168) GN=yhbJ PE=3 SV=1	108	23608	19.25	IKGEQTVDVK
588	1::sw|O31593|YHBJ_BACSU	Putative efflux system component YhbJ OS=Bacillus subtilis (strain 168) GN=yhbJ PE=3 SV=1	108	23608	23.69	VSDWDLDEGK
588	1::sw|O31593|YHBJ_BACSU	Putative efflux system component YhbJ OS=Bacillus subtilis (strain 168) GN=yhbJ PE=3 SV=1	108	23608	34.92	VAGDMAAITAPAAGK
588	1::sw|O31593|YHBJ_BACSU	Putative efflux system component YhbJ OS=Bacillus subtilis (strain 168) GN=yhbJ PE=3 SV=1	108	23608	50.18	VAGDMAAITAPAAGK
588	1::sw|O31593|YHBJ_BACSU	Putative efflux system component YhbJ OS=Bacillus subtilis (strain 168) GN=yhbJ PE=3 SV=1	108	23608	48.94	VAGDMAAITAPAAGK
682	1::sw|O31615|YJBQ_BACSU	Putative Na(+)/H(+) antiporter YjbQ OS=Bacillus subtilis (strain 168) GN=yjbQ PE=3 SV=1	81	67482	33.89	VIASVGSPEHEAALK
682	1::sw|O31615|YJBQ_BACSU	Putative Na(+)/H(+) antiporter YjbQ OS=Bacillus subtilis (strain 168) GN=yjbQ PE=3 SV=1	81	67482	30.91	VIASVGSPEHEAALK
682	1::sw|O31615|YJBQ_BACSU	Putative Na(+)/H(+) antiporter YjbQ OS=Bacillus subtilis (strain 168) GN=yjbQ PE=3 SV=1	81	67482	49.32	EQGISIFSILLSTK
920	1::sw|O31618|THIG_BACSU	Thiazole synthase OS=Bacillus subtilis (strain 168) GN=thiG PE=1 SV=1	41	27119	41.24	VPVIVDAGIGSPK
715	1::sw|O31619|THIF_BACSU	Sulfur carrier protein ThiS adenylyltransferase OS=Bacillus subtilis (strain 168) GN=thiF PE=3 SV=1	74	36890	28.07	ALIHGTNDIAR
715	1::sw|O31619|THIF_BACSU	Sulfur carrier protein ThiS adenylyltransferase OS=Bacillus subtilis (strain 168) GN=thiF PE=3 SV=1	74	36890	29.6	EADLEALAGQLR
715	1::sw|O31619|THIF_BACSU	Sulfur carrier protein ThiS adenylyltransferase OS=Bacillus subtilis (strain 168) GN=thiF PE=3 SV=1	74	36890	26.65	EADLEALAGQLR
715	1::sw|O31619|THIF_BACSU	Sulfur carrier protein ThiS adenylyltransferase OS=Bacillus subtilis (strain 168) GN=thiF PE=3 SV=1	74	36890	47.79	LLTGEECEPVLR
250	1::sw|O31620|THID_BACSU	Hydroxymethylpyrimidine/phosphomethylpyrimidine kinase OS=Bacillus subtilis (strain 168) GN=thiD PE=1 SV=1	370	29163	71.87	MGAQHVIIK
250	1::sw|O31620|THID_BACSU	Hydroxymethylpyrimidine/phosphomethylpyrimidine kinase OS=Bacillus subtilis (strain 168) GN=thiD PE=1 SV=1	370	29163	58.27	MGAQHVIIK
250	1::sw|O31620|THID_BACSU	Hydroxymethylpyrimidine/phosphomethylpyrimidine kinase OS=Bacillus subtilis (strain 168) GN=thiD PE=1 SV=1	370	29163	29.85	KIDEYGFNR
250	1::sw|O31620|THID_BACSU	Hydroxymethylpyrimidine/phosphomethylpyrimidine kinase OS=Bacillus subtilis (strain 168) GN=thiD PE=1 SV=1	370	29163	19.93	KIDEYGFNR
250	1::sw|O31620|THID_BACSU	Hydroxymethylpyrimidine/phosphomethylpyrimidine kinase OS=Bacillus subtilis (strain 168) GN=thiD PE=1 SV=1	370	29163	63.45	TGMLWNADMIEEVAR
250	1::sw|O31620|THID_BACSU	Hydroxymethylpyrimidine/phosphomethylpyrimidine kinase OS=Bacillus subtilis (strain 168) GN=thiD PE=1 SV=1	370	29163	56.46	GDSIHQAFEVAANFVR
250	1::sw|O31620|THID_BACSU	Hydroxymethylpyrimidine/phosphomethylpyrimidine kinase OS=Bacillus subtilis (strain 168) GN=thiD PE=1 SV=1	370	29163	58.02	GDSIHQAFEVAANFVR
250	1::sw|O31620|THID_BACSU	Hydroxymethylpyrimidine/phosphomethylpyrimidine kinase OS=Bacillus subtilis (strain 168) GN=thiD PE=1 SV=1	370	29163	41.1	GDSIHQAFEVAANFVR
250	1::sw|O31620|THID_BACSU	Hydroxymethylpyrimidine/phosphomethylpyrimidine kinase OS=Bacillus subtilis (strain 168) GN=thiD PE=1 SV=1	370	29163	94.34	ALTIAGSDSGGGAGIQADIK
250	1::sw|O31620|THID_BACSU	Hydroxymethylpyrimidine/phosphomethylpyrimidine kinase OS=Bacillus subtilis (strain 168) GN=thiD PE=1 SV=1	370	29163	29.65	HTHGTGCTFAAALTAQTAK
250	1::sw|O31620|THID_BACSU	Hydroxymethylpyrimidine/phosphomethylpyrimidine kinase OS=Bacillus subtilis (strain 168) GN=thiD PE=1 SV=1	370	29163	29.46	EAVENTLGIGSGHGPTNHFAFK
250	1::sw|O31620|THID_BACSU	Hydroxymethylpyrimidine/phosphomethylpyrimidine kinase OS=Bacillus subtilis (strain 168) GN=thiD PE=1 SV=1	370	29163	46.72	EAVENTLGIGSGHGPTNHFAFK
823	1::sw|O31623|YJCA_BACSU	Sporulation protein YjcA OS=Bacillus subtilis (strain 168) GN=yjcA PE=2 SV=1	55	13255	54.68	LLVFDTIMAPLR
651	1::sw|O31629|YJCG_BACSU	UPF0477 protein YjcG OS=Bacillus subtilis (strain 168) GN=yjcG PE=1 SV=1	89	19706	30.05	YGIVLFPSK
651	1::sw|O31629|YJCG_BACSU	UPF0477 protein YjcG OS=Bacillus subtilis (strain 168) GN=yjcG PE=1 SV=1	89	19706	31.18	ADQLVSHLR
651	1::sw|O31629|YJCG_BACSU	UPF0477 protein YjcG OS=Bacillus subtilis (strain 168) GN=yjcG PE=1 SV=1	89	19706	30.68	ADQLVSHLR
651	1::sw|O31629|YJCG_BACSU	UPF0477 protein YjcG OS=Bacillus subtilis (strain 168) GN=yjcG PE=1 SV=1	89	19706	43.61	ASFECAEEK
651	1::sw|O31629|YJCG_BACSU	UPF0477 protein YjcG OS=Bacillus subtilis (strain 168) GN=yjcG PE=1 SV=1	89	19706	31.57	LQDLANSYR
651	1::sw|O31629|YJCG_BACSU	UPF0477 protein YjcG OS=Bacillus subtilis (strain 168) GN=yjcG PE=1 SV=1	89	19706	29.49	YSSFAPVNNVIYIK
915	1::sw|O31631|METI_BACSU	Cystathionine gamma-synthase/O-acetylhomoserine (thiol)-lyase OS=Bacillus subtilis (strain 168) GN=metI PE=1 SV=1	42	41907	42.5	GIGESTGFDYVR
849	1::sw|O31634|YJCL_BACSU	Uncharacterized membrane protein YjcL OS=Bacillus subtilis (strain 168) GN=yjcL PE=4 SV=1	51	43293	22.17	HYAMPFEEK
849	1::sw|O31634|YJCL_BACSU	Uncharacterized membrane protein YjcL OS=Bacillus subtilis (strain 168) GN=yjcL PE=4 SV=1	51	43293	31.81	HYAMPFEEK
849	1::sw|O31634|YJCL_BACSU	Uncharacterized membrane protein YjcL OS=Bacillus subtilis (strain 168) GN=yjcL PE=4 SV=1	51	43293	19.12	HYAMPFEEK
849	1::sw|O31634|YJCL_BACSU	Uncharacterized membrane protein YjcL OS=Bacillus subtilis (strain 168) GN=yjcL PE=4 SV=1	51	43293	24.6	HYAMPFEEK
849	1::sw|O31634|YJCL_BACSU	Uncharacterized membrane protein YjcL OS=Bacillus subtilis (strain 168) GN=yjcL PE=4 SV=1	51	43293	23.46	HYAMPFEEK
890	1::sw|O31635|YJCM_BACSU	Uncharacterized protein YjcM OS=Bacillus subtilis (strain 168) GN=yjcM PE=4 SV=1	45	46660	21.89	GYSGYAAMK	Oxidation (M)
890	1::sw|O31635|YJCM_BACSU	Uncharacterized protein YjcM OS=Bacillus subtilis (strain 168) GN=yjcM PE=4 SV=1	45	46660	21.9	GYSGYAAMK	Oxidation (M)
890	1::sw|O31635|YJCM_BACSU	Uncharacterized protein YjcM OS=Bacillus subtilis (strain 168) GN=yjcM PE=4 SV=1	45	46660	18.82	GYSGYAAMK	Oxidation (M)
890	1::sw|O31635|YJCM_BACSU	Uncharacterized protein YjcM OS=Bacillus subtilis (strain 168) GN=yjcM PE=4 SV=1	45	46660	20.75	GYSGYAAMK	Oxidation (M)
890	1::sw|O31635|YJCM_BACSU	Uncharacterized protein YjcM OS=Bacillus subtilis (strain 168) GN=yjcM PE=4 SV=1	45	46660	21.91	GYSGYAAMK	Oxidation (M)
890	1::sw|O31635|YJCM_BACSU	Uncharacterized protein YjcM OS=Bacillus subtilis (strain 168) GN=yjcM PE=4 SV=1	45	46660	24.7	GYSGYAAMK	Oxidation (M)
890	1::sw|O31635|YJCM_BACSU	Uncharacterized protein YjcM OS=Bacillus subtilis (strain 168) GN=yjcM PE=4 SV=1	45	46660	24.44	GYSGYAAMK	Oxidation (M)
890	1::sw|O31635|YJCM_BACSU	Uncharacterized protein YjcM OS=Bacillus subtilis (strain 168) GN=yjcM PE=4 SV=1	45	46660	18.46	GYSGYAAMK	Oxidation (M)
890	1::sw|O31635|YJCM_BACSU	Uncharacterized protein YjcM OS=Bacillus subtilis (strain 168) GN=yjcM PE=4 SV=1	45	46660	21.38	GYSGYAAMK	Oxidation (M)
890	1::sw|O31635|YJCM_BACSU	Uncharacterized protein YjcM OS=Bacillus subtilis (strain 168) GN=yjcM PE=4 SV=1	45	46660	21.13	GYSGYAAMK	Oxidation (M)
890	1::sw|O31635|YJCM_BACSU	Uncharacterized protein YjcM OS=Bacillus subtilis (strain 168) GN=yjcM PE=4 SV=1	45	46660	36.85	TVSDTYSNVK
890	1::sw|O31635|YJCM_BACSU	Uncharacterized protein YjcM OS=Bacillus subtilis (strain 168) GN=yjcM PE=4 SV=1	45	46660	24.73	EWKPYTDAWVNAGAFR
572	1::sw|O31636|YJCN_BACSU	Uncharacterized protein YjcN OS=Bacillus subtilis (strain 168) GN=yjcN PE=4 SV=1	116	12053	42.74	SSDGEYEVSCGTGP
572	1::sw|O31636|YJCN_BACSU	Uncharacterized protein YjcN OS=Bacillus subtilis (strain 168) GN=yjcN PE=4 SV=1	116	12053	53.29	DETGQTPHLCYSK
572	1::sw|O31636|YJCN_BACSU	Uncharacterized protein YjcN OS=Bacillus subtilis (strain 168) GN=yjcN PE=4 SV=1	116	12053	57.61	GYPYQSYFAVLQK
572	1::sw|O31636|YJCN_BACSU	Uncharacterized protein YjcN OS=Bacillus subtilis (strain 168) GN=yjcN PE=4 SV=1	116	12053	21.11	GYPYQSYFAVLQK
311	1::sw|O31638|YJCP_BACSU	Uncharacterized protein YjcP OS=Bacillus subtilis (strain 168) GN=yjcP PE=4 SV=1	275	20131	38.19	FQSLLYK
311	1::sw|O31638|YJCP_BACSU	Uncharacterized protein YjcP OS=Bacillus subtilis (strain 168) GN=yjcP PE=4 SV=1	275	20131	20.25	FQSLLYK
311	1::sw|O31638|YJCP_BACSU	Uncharacterized protein YjcP OS=Bacillus subtilis (strain 168) GN=yjcP PE=4 SV=1	275	20131	32.29	FQSLLYK
311	1::sw|O31638|YJCP_BACSU	Uncharacterized protein YjcP OS=Bacillus subtilis (strain 168) GN=yjcP PE=4 SV=1	275	20131	33.72	NQAISIMK
311	1::sw|O31638|YJCP_BACSU	Uncharacterized protein YjcP OS=Bacillus subtilis (strain 168) GN=yjcP PE=4 SV=1	275	20131	48.33	ELLAFFLEK
311	1::sw|O31638|YJCP_BACSU	Uncharacterized protein YjcP OS=Bacillus subtilis (strain 168) GN=yjcP PE=4 SV=1	275	20131	42.71	ELLAFFLEK
311	1::sw|O31638|YJCP_BACSU	Uncharacterized protein YjcP OS=Bacillus subtilis (strain 168) GN=yjcP PE=4 SV=1	275	20131	32.12	ELLAFFLEK
311	1::sw|O31638|YJCP_BACSU	Uncharacterized protein YjcP OS=Bacillus subtilis (strain 168) GN=yjcP PE=4 SV=1	275	20131	35.55	ELLAFFLEK
311	1::sw|O31638|YJCP_BACSU	Uncharacterized protein YjcP OS=Bacillus subtilis (strain 168) GN=yjcP PE=4 SV=1	275	20131	32.29	ELLAFFLEK
311	1::sw|O31638|YJCP_BACSU	Uncharacterized protein YjcP OS=Bacillus subtilis (strain 168) GN=yjcP PE=4 SV=1	275	20131	34.29	IGHDKEEYK
311	1::sw|O31638|YJCP_BACSU	Uncharacterized protein YjcP OS=Bacillus subtilis (strain 168) GN=yjcP PE=4 SV=1	275	20131	30.5	IGHDKEEYK
311	1::sw|O31638|YJCP_BACSU	Uncharacterized protein YjcP OS=Bacillus subtilis (strain 168) GN=yjcP PE=4 SV=1	275	20131	24.32	FSHIDIIHDHSK
311	1::sw|O31638|YJCP_BACSU	Uncharacterized protein YjcP OS=Bacillus subtilis (strain 168) GN=yjcP PE=4 SV=1	275	20131	23.54	FSHIDIIHDHSK
311	1::sw|O31638|YJCP_BACSU	Uncharacterized protein YjcP OS=Bacillus subtilis (strain 168) GN=yjcP PE=4 SV=1	275	20131	26.04	FSHIDIIHDHSK
311	1::sw|O31638|YJCP_BACSU	Uncharacterized protein YjcP OS=Bacillus subtilis (strain 168) GN=yjcP PE=4 SV=1	275	20131	78.36	LDIECLEFAISR
311	1::sw|O31638|YJCP_BACSU	Uncharacterized protein YjcP OS=Bacillus subtilis (strain 168) GN=yjcP PE=4 SV=1	275	20131	42.74	LDIECLEFAISR
311	1::sw|O31638|YJCP_BACSU	Uncharacterized protein YjcP OS=Bacillus subtilis (strain 168) GN=yjcP PE=4 SV=1	275	20131	28.96	NNEDLEELENAIYTYHK
680	1::sw|O31654|SIGI_BACSU	RNA polymerase sigma factor SigI OS=Bacillus subtilis (strain 168) GN=sigI PE=1 SV=1	82	29289	22.78	ELLENSPK
680	1::sw|O31654|SIGI_BACSU	RNA polymerase sigma factor SigI OS=Bacillus subtilis (strain 168) GN=sigI PE=1 SV=1	82	29289	81.55	GNSLLAFAELIIK
831	1::sw|O31655|RSGI_BACSU	Anti-sigma-I factor RsgI OS=Bacillus subtilis (strain 168) GN=rsgI PE=1 SV=1	53	43620	36.3	ASFFDFFK
831	1::sw|O31655|RSGI_BACSU	Anti-sigma-I factor RsgI OS=Bacillus subtilis (strain 168) GN=rsgI PE=1 SV=1	53	43620	19.71	ESDENTNTEK
831	1::sw|O31655|RSGI_BACSU	Anti-sigma-I factor RsgI OS=Bacillus subtilis (strain 168) GN=rsgI PE=1 SV=1	53	43620	34.59	FVTLLTPDGQFLK
240	1::sw|O31657|HTPX_BACSU	Protease HtpX homolog OS=Bacillus subtilis (strain 168) GN=htpX PE=3 SV=1	392	32845	42.6	MPEVGIYR
240	1::sw|O31657|HTPX_BACSU	Protease HtpX homolog OS=Bacillus subtilis (strain 168) GN=htpX PE=3 SV=1	392	32845	24.63	MPEVGIYR
240	1::sw|O31657|HTPX_BACSU	Protease HtpX homolog OS=Bacillus subtilis (strain 168) GN=htpX PE=3 SV=1	392	32845	79.41	ILEDDQTAVQTLK
240	1::sw|O31657|HTPX_BACSU	Protease HtpX homolog OS=Bacillus subtilis (strain 168) GN=htpX PE=3 SV=1	392	32845	90.94	ILEDDQTAVQTLK
240	1::sw|O31657|HTPX_BACSU	Protease HtpX homolog OS=Bacillus subtilis (strain 168) GN=htpX PE=3 SV=1	392	32845	104.07	ILEDDQTAVQTLK
240	1::sw|O31657|HTPX_BACSU	Protease HtpX homolog OS=Bacillus subtilis (strain 168) GN=htpX PE=3 SV=1	392	32845	75.25	ILEDDQTAVQTLK
240	1::sw|O31657|HTPX_BACSU	Protease HtpX homolog OS=Bacillus subtilis (strain 168) GN=htpX PE=3 SV=1	392	32845	45.32	SSLFSTHPDLDER
240	1::sw|O31657|HTPX_BACSU	Protease HtpX homolog OS=Bacillus subtilis (strain 168) GN=htpX PE=3 SV=1	392	32845	64.91	HSLSYEEQQLVDR
240	1::sw|O31657|HTPX_BACSU	Protease HtpX homolog OS=Bacillus subtilis (strain 168) GN=htpX PE=3 SV=1	392	32845	29.72	KHSLSYEEQQLVDR
24	1::sw|O31662|MTNA_BACSU	Methylthioribose-1-phosphate isomerase OS=Bacillus subtilis (strain 168) GN=mtnA PE=1 SV=1	2378	39064	34.19	QYLNSSR
24	1::sw|O31662|MTNA_BACSU	Methylthioribose-1-phosphate isomerase OS=Bacillus subtilis (strain 168) GN=mtnA PE=1 SV=1	2378	39064	25.08	QYLNSSR
24	1::sw|O31662|MTNA_BACSU	Methylthioribose-1-phosphate isomerase OS=Bacillus subtilis (strain 168) GN=mtnA PE=1 SV=1	2378	39064	64.08	QISAVIVGADR
24	1::sw|O31662|MTNA_BACSU	Methylthioribose-1-phosphate isomerase OS=Bacillus subtilis (strain 168) GN=mtnA PE=1 SV=1	2378	39064	34.82	QISAVIVGADR
24	1::sw|O31662|MTNA_BACSU	Methylthioribose-1-phosphate isomerase OS=Bacillus subtilis (strain 168) GN=mtnA PE=1 SV=1	2378	39064	22.39	QISAVIVGADR
24	1::sw|O31662|MTNA_BACSU	Methylthioribose-1-phosphate isomerase OS=Bacillus subtilis (strain 168) GN=mtnA PE=1 SV=1	2378	39064	69.32	QISAVIVGADR
24	1::sw|O31662|MTNA_BACSU	Methylthioribose-1-phosphate isomerase OS=Bacillus subtilis (strain 168) GN=mtnA PE=1 SV=1	2378	39064	66.04	QISAVIVGADR
24	1::sw|O31662|MTNA_BACSU	Methylthioribose-1-phosphate isomerase OS=Bacillus subtilis (strain 168) GN=mtnA PE=1 SV=1	2378	39064	31	QISAVIVGADR
24	1::sw|O31662|MTNA_BACSU	Methylthioribose-1-phosphate isomerase OS=Bacillus subtilis (strain 168) GN=mtnA PE=1 SV=1	2378	39064	32.17	QISAVIVGADR
24	1::sw|O31662|MTNA_BACSU	Methylthioribose-1-phosphate isomerase OS=Bacillus subtilis (strain 168) GN=mtnA PE=1 SV=1	2378	39064	44.87	QISAVIVGADR
24	1::sw|O31662|MTNA_BACSU	Methylthioribose-1-phosphate isomerase OS=Bacillus subtilis (strain 168) GN=mtnA PE=1 SV=1	2378	39064	46.62	LIGQNALQLFK
24	1::sw|O31662|MTNA_BACSU	Methylthioribose-1-phosphate isomerase OS=Bacillus subtilis (strain 168) GN=mtnA PE=1 SV=1	2378	39064	60.47	LIGQNALQLFK
24	1::sw|O31662|MTNA_BACSU	Methylthioribose-1-phosphate isomerase OS=Bacillus subtilis (strain 168) GN=mtnA PE=1 SV=1	2378	39064	45.49	LIGQNALQLFK
24	1::sw|O31662|MTNA_BACSU	Methylthioribose-1-phosphate isomerase OS=Bacillus subtilis (strain 168) GN=mtnA PE=1 SV=1	2378	39064	74.93	LIGQNALQLFK
24	1::sw|O31662|MTNA_BACSU	Methylthioribose-1-phosphate isomerase OS=Bacillus subtilis (strain 168) GN=mtnA PE=1 SV=1	2378	39064	54.07	LIGQNALQLFK
24	1::sw|O31662|MTNA_BACSU	Methylthioribose-1-phosphate isomerase OS=Bacillus subtilis (strain 168) GN=mtnA PE=1 SV=1	2378	39064	55.37	LIGQNALQLFK
24	1::sw|O31662|MTNA_BACSU	Methylthioribose-1-phosphate isomerase OS=Bacillus subtilis (strain 168) GN=mtnA PE=1 SV=1	2378	39064	56.25	LIGQNALQLFK
24	1::sw|O31662|MTNA_BACSU	Methylthioribose-1-phosphate isomerase OS=Bacillus subtilis (strain 168) GN=mtnA PE=1 SV=1	2378	39064	62.83	LIGQNALQLFK
24	1::sw|O31662|MTNA_BACSU	Methylthioribose-1-phosphate isomerase OS=Bacillus subtilis (strain 168) GN=mtnA PE=1 SV=1	2378	39064	22.44	LIGQNALQLFK
24	1::sw|O31662|MTNA_BACSU	Methylthioribose-1-phosphate isomerase OS=Bacillus subtilis (strain 168) GN=mtnA PE=1 SV=1	2378	39064	63.13	EDVFDAIVTLK
24	1::sw|O31662|MTNA_BACSU	Methylthioribose-1-phosphate isomerase OS=Bacillus subtilis (strain 168) GN=mtnA PE=1 SV=1	2378	39064	72.76	EDVFDAIVTLK
24	1::sw|O31662|MTNA_BACSU	Methylthioribose-1-phosphate isomerase OS=Bacillus subtilis (strain 168) GN=mtnA PE=1 SV=1	2378	39064	63.82	EDVFDAIVTLK
24	1::sw|O31662|MTNA_BACSU	Methylthioribose-1-phosphate isomerase OS=Bacillus subtilis (strain 168) GN=mtnA PE=1 SV=1	2378	39064	54.6	EDVFDAIVTLK
24	1::sw|O31662|MTNA_BACSU	Methylthioribose-1-phosphate isomerase OS=Bacillus subtilis (strain 168) GN=mtnA PE=1 SV=1	2378	39064	46.3	ETAITILNQQK
24	1::sw|O31662|MTNA_BACSU	Methylthioribose-1-phosphate isomerase OS=Bacillus subtilis (strain 168) GN=mtnA PE=1 SV=1	2378	39064	24.46	ETAITILNQQK
24	1::sw|O31662|MTNA_BACSU	Methylthioribose-1-phosphate isomerase OS=Bacillus subtilis (strain 168) GN=mtnA PE=1 SV=1	2378	39064	22.31	ETAITILNQQK
24	1::sw|O31662|MTNA_BACSU	Methylthioribose-1-phosphate isomerase OS=Bacillus subtilis (strain 168) GN=mtnA PE=1 SV=1	2378	39064	20.2	ETAITILNQQK
24	1::sw|O31662|MTNA_BACSU	Methylthioribose-1-phosphate isomerase OS=Bacillus subtilis (strain 168) GN=mtnA PE=1 SV=1	2378	39064	45.59	ETAITILNQQK
24	1::sw|O31662|MTNA_BACSU	Methylthioribose-1-phosphate isomerase OS=Bacillus subtilis (strain 168) GN=mtnA PE=1 SV=1	2378	39064	34.23	ETAITILNQQK
24	1::sw|O31662|MTNA_BACSU	Methylthioribose-1-phosphate isomerase OS=Bacillus subtilis (strain 168) GN=mtnA PE=1 SV=1	2378	39064	45.36	YGTALAPFYLAK
24	1::sw|O31662|MTNA_BACSU	Methylthioribose-1-phosphate isomerase OS=Bacillus subtilis (strain 168) GN=mtnA PE=1 SV=1	2378	39064	56.15	DIETDNVTEFR
24	1::sw|O31662|MTNA_BACSU	Methylthioribose-1-phosphate isomerase OS=Bacillus subtilis (strain 168) GN=mtnA PE=1 SV=1	2378	39064	42.83	DIETDNVTEFR
24	1::sw|O31662|MTNA_BACSU	Methylthioribose-1-phosphate isomerase OS=Bacillus subtilis (strain 168) GN=mtnA PE=1 SV=1	2378	39064	57.84	DIETDNVTEFR
24	1::sw|O31662|MTNA_BACSU	Methylthioribose-1-phosphate isomerase OS=Bacillus subtilis (strain 168) GN=mtnA PE=1 SV=1	2378	39064	58.58	DIETDNVTEFR
24	1::sw|O31662|MTNA_BACSU	Methylthioribose-1-phosphate isomerase OS=Bacillus subtilis (strain 168) GN=mtnA PE=1 SV=1	2378	39064	65.69	DIETDNVTEFR
24	1::sw|O31662|MTNA_BACSU	Methylthioribose-1-phosphate isomerase OS=Bacillus subtilis (strain 168) GN=mtnA PE=1 SV=1	2378	39064	31.37	PTAINLSWALER
24	1::sw|O31662|MTNA_BACSU	Methylthioribose-1-phosphate isomerase OS=Bacillus subtilis (strain 168) GN=mtnA PE=1 SV=1	2378	39064	91.03	PTAINLSWALER
24	1::sw|O31662|MTNA_BACSU	Methylthioribose-1-phosphate isomerase OS=Bacillus subtilis (strain 168) GN=mtnA PE=1 SV=1	2378	39064	58.34	PTAINLSWALER
24	1::sw|O31662|MTNA_BACSU	Methylthioribose-1-phosphate isomerase OS=Bacillus subtilis (strain 168) GN=mtnA PE=1 SV=1	2378	39064	27.7	PTAINLSWALER
24	1::sw|O31662|MTNA_BACSU	Methylthioribose-1-phosphate isomerase OS=Bacillus subtilis (strain 168) GN=mtnA PE=1 SV=1	2378	39064	24.16	DLGLHIYACETR
24	1::sw|O31662|MTNA_BACSU	Methylthioribose-1-phosphate isomerase OS=Bacillus subtilis (strain 168) GN=mtnA PE=1 SV=1	2378	39064	21.97	DLGLHIYACETR
24	1::sw|O31662|MTNA_BACSU	Methylthioribose-1-phosphate isomerase OS=Bacillus subtilis (strain 168) GN=mtnA PE=1 SV=1	2378	39064	95.96	IMTICNAGSIATSR
24	1::sw|O31662|MTNA_BACSU	Methylthioribose-1-phosphate isomerase OS=Bacillus subtilis (strain 168) GN=mtnA PE=1 SV=1	2378	39064	93.27	IMTICNAGSIATSR
24	1::sw|O31662|MTNA_BACSU	Methylthioribose-1-phosphate isomerase OS=Bacillus subtilis (strain 168) GN=mtnA PE=1 SV=1	2378	39064	104.59	IMTICNAGSIATSR
24	1::sw|O31662|MTNA_BACSU	Methylthioribose-1-phosphate isomerase OS=Bacillus subtilis (strain 168) GN=mtnA PE=1 SV=1	2378	39064	122.12	IMTICNAGSIATSR
24	1::sw|O31662|MTNA_BACSU	Methylthioribose-1-phosphate isomerase OS=Bacillus subtilis (strain 168) GN=mtnA PE=1 SV=1	2378	39064	73.07	IMTICNAGSIATSR	Oxidation (M)
24	1::sw|O31662|MTNA_BACSU	Methylthioribose-1-phosphate isomerase OS=Bacillus subtilis (strain 168) GN=mtnA PE=1 SV=1	2378	39064	107.42	IMTICNAGSIATSR	Oxidation (M)
24	1::sw|O31662|MTNA_BACSU	Methylthioribose-1-phosphate isomerase OS=Bacillus subtilis (strain 168) GN=mtnA PE=1 SV=1	2378	39064	97.34	LPDETEYLELTTK
24	1::sw|O31662|MTNA_BACSU	Methylthioribose-1-phosphate isomerase OS=Bacillus subtilis (strain 168) GN=mtnA PE=1 SV=1	2378	39064	52.16	LPDETEYLELTTK
24	1::sw|O31662|MTNA_BACSU	Methylthioribose-1-phosphate isomerase OS=Bacillus subtilis (strain 168) GN=mtnA PE=1 SV=1	2378	39064	60.52	LPDETEYLELTTK
24	1::sw|O31662|MTNA_BACSU	Methylthioribose-1-phosphate isomerase OS=Bacillus subtilis (strain 168) GN=mtnA PE=1 SV=1	2378	39064	62.48	LPDETEYLELTTK
24	1::sw|O31662|MTNA_BACSU	Methylthioribose-1-phosphate isomerase OS=Bacillus subtilis (strain 168) GN=mtnA PE=1 SV=1	2378	39064	76.37	LSHSVENAISVNEAK
24	1::sw|O31662|MTNA_BACSU	Methylthioribose-1-phosphate isomerase OS=Bacillus subtilis (strain 168) GN=mtnA PE=1 SV=1	2378	39064	61.27	LSHSVENAISVNEAK
24	1::sw|O31662|MTNA_BACSU	Methylthioribose-1-phosphate isomerase OS=Bacillus subtilis (strain 168) GN=mtnA PE=1 SV=1	2378	39064	25.21	LSHSVENAISVNEAK
24	1::sw|O31662|MTNA_BACSU	Methylthioribose-1-phosphate isomerase OS=Bacillus subtilis (strain 168) GN=mtnA PE=1 SV=1	2378	39064	21.63	LSHSVENAISVNEAK
24	1::sw|O31662|MTNA_BACSU	Methylthioribose-1-phosphate isomerase OS=Bacillus subtilis (strain 168) GN=mtnA PE=1 SV=1	2378	39064	20.18	LSHSVENAISVNEAK
24	1::sw|O31662|MTNA_BACSU	Methylthioribose-1-phosphate isomerase OS=Bacillus subtilis (strain 168) GN=mtnA PE=1 SV=1	2378	39064	22.68	LSHSVENAISVNEAK
24	1::sw|O31662|MTNA_BACSU	Methylthioribose-1-phosphate isomerase OS=Bacillus subtilis (strain 168) GN=mtnA PE=1 SV=1	2378	39064	31.38	LSHSVENAISVNEAK
24	1::sw|O31662|MTNA_BACSU	Methylthioribose-1-phosphate isomerase OS=Bacillus subtilis (strain 168) GN=mtnA PE=1 SV=1	2378	39064	62.85	GAPAIGITAAFGLALAAK
24	1::sw|O31662|MTNA_BACSU	Methylthioribose-1-phosphate isomerase OS=Bacillus subtilis (strain 168) GN=mtnA PE=1 SV=1	2378	39064	103.77	GAPAIGITAAFGLALAAK
24	1::sw|O31662|MTNA_BACSU	Methylthioribose-1-phosphate isomerase OS=Bacillus subtilis (strain 168) GN=mtnA PE=1 SV=1	2378	39064	83.28	GAPAIGITAAFGLALAAK
24	1::sw|O31662|MTNA_BACSU	Methylthioribose-1-phosphate isomerase OS=Bacillus subtilis (strain 168) GN=mtnA PE=1 SV=1	2378	39064	68.18	GAPAIGITAAFGLALAAK
24	1::sw|O31662|MTNA_BACSU	Methylthioribose-1-phosphate isomerase OS=Bacillus subtilis (strain 168) GN=mtnA PE=1 SV=1	2378	39064	54.14	GAPAIGITAAFGLALAAK
24	1::sw|O31662|MTNA_BACSU	Methylthioribose-1-phosphate isomerase OS=Bacillus subtilis (strain 168) GN=mtnA PE=1 SV=1	2378	39064	89.48	GAPAIGITAAFGLALAAK
24	1::sw|O31662|MTNA_BACSU	Methylthioribose-1-phosphate isomerase OS=Bacillus subtilis (strain 168) GN=mtnA PE=1 SV=1	2378	39064	63.37	GAPAIGITAAFGLALAAK
24	1::sw|O31662|MTNA_BACSU	Methylthioribose-1-phosphate isomerase OS=Bacillus subtilis (strain 168) GN=mtnA PE=1 SV=1	2378	39064	30.89	GAPAIGITAAFGLALAAK
24	1::sw|O31662|MTNA_BACSU	Methylthioribose-1-phosphate isomerase OS=Bacillus subtilis (strain 168) GN=mtnA PE=1 SV=1	2378	39064	51.3	GIMTGNYEEEIEQLFK
24	1::sw|O31662|MTNA_BACSU	Methylthioribose-1-phosphate isomerase OS=Bacillus subtilis (strain 168) GN=mtnA PE=1 SV=1	2378	39064	43.79	TNLVHEAIQIQVEDEETCR
34	1::sw|O31663|MTNK_BACSU	Methylthioribose kinase OS=Bacillus subtilis (strain 168) GN=mtnK PE=1 SV=2	1856	45228	20.66	LLVKE
34	1::sw|O31663|MTNK_BACSU	Methylthioribose kinase OS=Bacillus subtilis (strain 168) GN=mtnK PE=1 SV=2	1856	45228	19.27	IESSALIR
34	1::sw|O31663|MTNK_BACSU	Methylthioribose kinase OS=Bacillus subtilis (strain 168) GN=mtnK PE=1 SV=2	1856	45228	50.45	IESSALIR
34	1::sw|O31663|MTNK_BACSU	Methylthioribose kinase OS=Bacillus subtilis (strain 168) GN=mtnK PE=1 SV=2	1856	45228	64.29	IESSALIR
34	1::sw|O31663|MTNK_BACSU	Methylthioribose kinase OS=Bacillus subtilis (strain 168) GN=mtnK PE=1 SV=2	1856	45228	59.66	IESSALIR
34	1::sw|O31663|MTNK_BACSU	Methylthioribose kinase OS=Bacillus subtilis (strain 168) GN=mtnK PE=1 SV=2	1856	45228	62.66	IESSALIR
34	1::sw|O31663|MTNK_BACSU	Methylthioribose kinase OS=Bacillus subtilis (strain 168) GN=mtnK PE=1 SV=2	1856	45228	59.95	IESSALIR
34	1::sw|O31663|MTNK_BACSU	Methylthioribose kinase OS=Bacillus subtilis (strain 168) GN=mtnK PE=1 SV=2	1856	45228	58.84	IESSALIR
34	1::sw|O31663|MTNK_BACSU	Methylthioribose kinase OS=Bacillus subtilis (strain 168) GN=mtnK PE=1 SV=2	1856	45228	28.85	LWNNDSVK
34	1::sw|O31663|MTNK_BACSU	Methylthioribose kinase OS=Bacillus subtilis (strain 168) GN=mtnK PE=1 SV=2	1856	45228	21.16	LWNNDSVK
34	1::sw|O31663|MTNK_BACSU	Methylthioribose kinase OS=Bacillus subtilis (strain 168) GN=mtnK PE=1 SV=2	1856	45228	30.8	LWNNDSVK
34	1::sw|O31663|MTNK_BACSU	Methylthioribose kinase OS=Bacillus subtilis (strain 168) GN=mtnK PE=1 SV=2	1856	45228	19	LWNNDSVK
34	1::sw|O31663|MTNK_BACSU	Methylthioribose kinase OS=Bacillus subtilis (strain 168) GN=mtnK PE=1 SV=2	1856	45228	25.12	LWNNDSVK
34	1::sw|O31663|MTNK_BACSU	Methylthioribose kinase OS=Bacillus subtilis (strain 168) GN=mtnK PE=1 SV=2	1856	45228	20.57	LWNNDSVK
34	1::sw|O31663|MTNK_BACSU	Methylthioribose kinase OS=Bacillus subtilis (strain 168) GN=mtnK PE=1 SV=2	1856	45228	57.17	TITDVIELFK
34	1::sw|O31663|MTNK_BACSU	Methylthioribose kinase OS=Bacillus subtilis (strain 168) GN=mtnK PE=1 SV=2	1856	45228	48.35	TITDVIELFK
34	1::sw|O31663|MTNK_BACSU	Methylthioribose kinase OS=Bacillus subtilis (strain 168) GN=mtnK PE=1 SV=2	1856	45228	56.63	TITDVIELFK
34	1::sw|O31663|MTNK_BACSU	Methylthioribose kinase OS=Bacillus subtilis (strain 168) GN=mtnK PE=1 SV=2	1856	45228	68.82	TITDVIELFK
34	1::sw|O31663|MTNK_BACSU	Methylthioribose kinase OS=Bacillus subtilis (strain 168) GN=mtnK PE=1 SV=2	1856	45228	41.82	TITDVIELFK
34	1::sw|O31663|MTNK_BACSU	Methylthioribose kinase OS=Bacillus subtilis (strain 168) GN=mtnK PE=1 SV=2	1856	45228	59.04	TITDVIELFK
34	1::sw|O31663|MTNK_BACSU	Methylthioribose kinase OS=Bacillus subtilis (strain 168) GN=mtnK PE=1 SV=2	1856	45228	44.93	TITDVIELFK
34	1::sw|O31663|MTNK_BACSU	Methylthioribose kinase OS=Bacillus subtilis (strain 168) GN=mtnK PE=1 SV=2	1856	45228	19.52	TITDVIELFK
34	1::sw|O31663|MTNK_BACSU	Methylthioribose kinase OS=Bacillus subtilis (strain 168) GN=mtnK PE=1 SV=2	1856	45228	68.84	TITDVIELFK
34	1::sw|O31663|MTNK_BACSU	Methylthioribose kinase OS=Bacillus subtilis (strain 168) GN=mtnK PE=1 SV=2	1856	45228	48.38	TITDVIELFK
34	1::sw|O31663|MTNK_BACSU	Methylthioribose kinase OS=Bacillus subtilis (strain 168) GN=mtnK PE=1 SV=2	1856	45228	71.69	TITDVIELFK
34	1::sw|O31663|MTNK_BACSU	Methylthioribose kinase OS=Bacillus subtilis (strain 168) GN=mtnK PE=1 SV=2	1856	45228	22.18	QGEHVPHLVPR
34	1::sw|O31663|MTNK_BACSU	Methylthioribose kinase OS=Bacillus subtilis (strain 168) GN=mtnK PE=1 SV=2	1856	45228	23.37	QGEHVPHLVPR
34	1::sw|O31663|MTNK_BACSU	Methylthioribose kinase OS=Bacillus subtilis (strain 168) GN=mtnK PE=1 SV=2	1856	45228	64.63	LALETGTAFIEK
34	1::sw|O31663|MTNK_BACSU	Methylthioribose kinase OS=Bacillus subtilis (strain 168) GN=mtnK PE=1 SV=2	1856	45228	54.93	LALETGTAFIEK
34	1::sw|O31663|MTNK_BACSU	Methylthioribose kinase OS=Bacillus subtilis (strain 168) GN=mtnK PE=1 SV=2	1856	45228	40.66	LALETGTAFIEK
34	1::sw|O31663|MTNK_BACSU	Methylthioribose kinase OS=Bacillus subtilis (strain 168) GN=mtnK PE=1 SV=2	1856	45228	80.04	LALETGTAFIEK
34	1::sw|O31663|MTNK_BACSU	Methylthioribose kinase OS=Bacillus subtilis (strain 168) GN=mtnK PE=1 SV=2	1856	45228	52.83	LALETGTAFIEK
34	1::sw|O31663|MTNK_BACSU	Methylthioribose kinase OS=Bacillus subtilis (strain 168) GN=mtnK PE=1 SV=2	1856	45228	93.34	LALETGTAFIEK
34	1::sw|O31663|MTNK_BACSU	Methylthioribose kinase OS=Bacillus subtilis (strain 168) GN=mtnK PE=1 SV=2	1856	45228	80.29	LALETGTAFIEK
34	1::sw|O31663|MTNK_BACSU	Methylthioribose kinase OS=Bacillus subtilis (strain 168) GN=mtnK PE=1 SV=2	1856	45228	77.37	LALETGTAFIEK
34	1::sw|O31663|MTNK_BACSU	Methylthioribose kinase OS=Bacillus subtilis (strain 168) GN=mtnK PE=1 SV=2	1856	45228	53.53	VVGESWPLTIDR
34	1::sw|O31663|MTNK_BACSU	Methylthioribose kinase OS=Bacillus subtilis (strain 168) GN=mtnK PE=1 SV=2	1856	45228	38.09	VVGESWPLTIDR
34	1::sw|O31663|MTNK_BACSU	Methylthioribose kinase OS=Bacillus subtilis (strain 168) GN=mtnK PE=1 SV=2	1856	45228	71.16	VVGESWPLTIDR
34	1::sw|O31663|MTNK_BACSU	Methylthioribose kinase OS=Bacillus subtilis (strain 168) GN=mtnK PE=1 SV=2	1856	45228	63.47	VVGESWPLTIDR
34	1::sw|O31663|MTNK_BACSU	Methylthioribose kinase OS=Bacillus subtilis (strain 168) GN=mtnK PE=1 SV=2	1856	45228	34.05	VVGESWPLTIDR
34	1::sw|O31663|MTNK_BACSU	Methylthioribose kinase OS=Bacillus subtilis (strain 168) GN=mtnK PE=1 SV=2	1856	45228	69.37	TLFYSSDYALEPK
34	1::sw|O31663|MTNK_BACSU	Methylthioribose kinase OS=Bacillus subtilis (strain 168) GN=mtnK PE=1 SV=2	1856	45228	51.96	TLFYSSDYALEPK
34	1::sw|O31663|MTNK_BACSU	Methylthioribose kinase OS=Bacillus subtilis (strain 168) GN=mtnK PE=1 SV=2	1856	45228	72.13	TLFYSSDYALEPK
34	1::sw|O31663|MTNK_BACSU	Methylthioribose kinase OS=Bacillus subtilis (strain 168) GN=mtnK PE=1 SV=2	1856	45228	75.28	TLFYSSDYALEPK
34	1::sw|O31663|MTNK_BACSU	Methylthioribose kinase OS=Bacillus subtilis (strain 168) GN=mtnK PE=1 SV=2	1856	45228	52.68	QFTNPELCDITER
34	1::sw|O31663|MTNK_BACSU	Methylthioribose kinase OS=Bacillus subtilis (strain 168) GN=mtnK PE=1 SV=2	1856	45228	67.64	QFTNPELCDITER
34	1::sw|O31663|MTNK_BACSU	Methylthioribose kinase OS=Bacillus subtilis (strain 168) GN=mtnK PE=1 SV=2	1856	45228	53.9	QFTNPELCDITER
34	1::sw|O31663|MTNK_BACSU	Methylthioribose kinase OS=Bacillus subtilis (strain 168) GN=mtnK PE=1 SV=2	1856	45228	82.57	TPLYETLNESSAVALAVK
34	1::sw|O31663|MTNK_BACSU	Methylthioribose kinase OS=Bacillus subtilis (strain 168) GN=mtnK PE=1 SV=2	1856	45228	71.24	TPLYETLNESSAVALAVK
34	1::sw|O31663|MTNK_BACSU	Methylthioribose kinase OS=Bacillus subtilis (strain 168) GN=mtnK PE=1 SV=2	1856	45228	48.16	TPLYETLNESSAVALAVK
34	1::sw|O31663|MTNK_BACSU	Methylthioribose kinase OS=Bacillus subtilis (strain 168) GN=mtnK PE=1 SV=2	1856	45228	60.92	TIGLAHVADLDTIVPFDK
34	1::sw|O31663|MTNK_BACSU	Methylthioribose kinase OS=Bacillus subtilis (strain 168) GN=mtnK PE=1 SV=2	1856	45228	31.49	TIGLAHVADLDTIVPFDK
34	1::sw|O31663|MTNK_BACSU	Methylthioribose kinase OS=Bacillus subtilis (strain 168) GN=mtnK PE=1 SV=2	1856	45228	37.81	TIGLAHVADLDTIVPFDK
34	1::sw|O31663|MTNK_BACSU	Methylthioribose kinase OS=Bacillus subtilis (strain 168) GN=mtnK PE=1 SV=2	1856	45228	32.52	TIGLAHVADLDTIVPFDK
34	1::sw|O31663|MTNK_BACSU	Methylthioribose kinase OS=Bacillus subtilis (strain 168) GN=mtnK PE=1 SV=2	1856	45228	29.23	TIGLAHVADLDTIVPFDKR
34	1::sw|O31663|MTNK_BACSU	Methylthioribose kinase OS=Bacillus subtilis (strain 168) GN=mtnK PE=1 SV=2	1856	45228	18.26	TIGLAHVADLDTIVPFDKR
34	1::sw|O31663|MTNK_BACSU	Methylthioribose kinase OS=Bacillus subtilis (strain 168) GN=mtnK PE=1 SV=2	1856	45228	56.09	TIGLAHVADLDTIVPFDKR
34	1::sw|O31663|MTNK_BACSU	Methylthioribose kinase OS=Bacillus subtilis (strain 168) GN=mtnK PE=1 SV=2	1856	45228	30.69	TIGLAHVADLDTIVPFDKR
34	1::sw|O31663|MTNK_BACSU	Methylthioribose kinase OS=Bacillus subtilis (strain 168) GN=mtnK PE=1 SV=2	1856	45228	49.66	TIGLAHVADLDTIVPFDKR
34	1::sw|O31663|MTNK_BACSU	Methylthioribose kinase OS=Bacillus subtilis (strain 168) GN=mtnK PE=1 SV=2	1856	45228	28.64	VFYSDTEMAVTVMEDLSHLK
34	1::sw|O31663|MTNK_BACSU	Methylthioribose kinase OS=Bacillus subtilis (strain 168) GN=mtnK PE=1 SV=2	1856	45228	31.97	VFYSDTEMAVTVMEDLSHLK
34	1::sw|O31663|MTNK_BACSU	Methylthioribose kinase OS=Bacillus subtilis (strain 168) GN=mtnK PE=1 SV=2	1856	45228	23.75	VFYSDTEMAVTVMEDLSHLK
34	1::sw|O31663|MTNK_BACSU	Methylthioribose kinase OS=Bacillus subtilis (strain 168) GN=mtnK PE=1 SV=2	1856	45228	38.06	VFYSDTEMAVTVMEDLSHLK	Oxidation (M)
34	1::sw|O31663|MTNK_BACSU	Methylthioribose kinase OS=Bacillus subtilis (strain 168) GN=mtnK PE=1 SV=2	1856	45228	42.36	VFYSDTEMAVTVMEDLSHLK	Oxidation (M)
34	1::sw|O31663|MTNK_BACSU	Methylthioribose kinase OS=Bacillus subtilis (strain 168) GN=mtnK PE=1 SV=2	1856	45228	34.5	VFYSDTEMAVTVMEDLSHLK	Oxidation (M)
34	1::sw|O31663|MTNK_BACSU	Methylthioribose kinase OS=Bacillus subtilis (strain 168) GN=mtnK PE=1 SV=2	1856	45228	28.96	GLIEGENYPHLSQHIGEFLGK
34	1::sw|O31663|MTNK_BACSU	Methylthioribose kinase OS=Bacillus subtilis (strain 168) GN=mtnK PE=1 SV=2	1856	45228	51.18	KGLIEGENYPHLSQHIGEFLGK
334	1::sw|O31664|MTNU_BACSU	Hydrolase MtnU OS=Bacillus subtilis (strain 168) GN=mtnU PE=3 SV=1	257	29666	32.28	KAEFFIEK
334	1::sw|O31664|MTNU_BACSU	Hydrolase MtnU OS=Bacillus subtilis (strain 168) GN=mtnU PE=3 SV=1	257	29666	18.77	KAEFFIEK
334	1::sw|O31664|MTNU_BACSU	Hydrolase MtnU OS=Bacillus subtilis (strain 168) GN=mtnU PE=3 SV=1	257	29666	41.93	SSGLICYDIR
334	1::sw|O31664|MTNU_BACSU	Hydrolase MtnU OS=Bacillus subtilis (strain 168) GN=mtnU PE=3 SV=1	257	29666	31.14	SSGLICYDIR
334	1::sw|O31664|MTNU_BACSU	Hydrolase MtnU OS=Bacillus subtilis (strain 168) GN=mtnU PE=3 SV=1	257	29666	33.99	HGVHIVAGSVAVR
334	1::sw|O31664|MTNU_BACSU	Hydrolase MtnU OS=Bacillus subtilis (strain 168) GN=mtnU PE=3 SV=1	257	29666	47.4	AEIDLQESAEVR
334	1::sw|O31664|MTNU_BACSU	Hydrolase MtnU OS=Bacillus subtilis (strain 168) GN=mtnU PE=3 SV=1	257	29666	27.74	VLAEGGREEGIVR
334	1::sw|O31664|MTNU_BACSU	Hydrolase MtnU OS=Bacillus subtilis (strain 168) GN=mtnU PE=3 SV=1	257	29666	39.44	NSDVYNTMYIADK
334	1::sw|O31664|MTNU_BACSU	Hydrolase MtnU OS=Bacillus subtilis (strain 168) GN=mtnU PE=3 SV=1	257	29666	66.82	NSDVYNTMYIADK
334	1::sw|O31664|MTNU_BACSU	Hydrolase MtnU OS=Bacillus subtilis (strain 168) GN=mtnU PE=3 SV=1	257	29666	55.41	GANVLFISAEWPLPR
334	1::sw|O31664|MTNU_BACSU	Hydrolase MtnU OS=Bacillus subtilis (strain 168) GN=mtnU PE=3 SV=1	257	29666	59.35	GANVLFISAEWPLPR
617	1::sw|O31666|MTNW_BACSU	2,3-diketo-5-methylthiopentyl-1-phosphate enolase OS=Bacillus subtilis (strain 168) GN=mtnW PE=1 SV=2	99	44186	21.79	LSLDGK
617	1::sw|O31666|MTNW_BACSU	2,3-diketo-5-methylthiopentyl-1-phosphate enolase OS=Bacillus subtilis (strain 168) GN=mtnW PE=1 SV=2	99	44186	35.36	FGVYGIR
617	1::sw|O31666|MTNW_BACSU	2,3-diketo-5-methylthiopentyl-1-phosphate enolase OS=Bacillus subtilis (strain 168) GN=mtnW PE=1 SV=2	99	44186	60.91	LIDLHFSEAFK
617	1::sw|O31666|MTNW_BACSU	2,3-diketo-5-methylthiopentyl-1-phosphate enolase OS=Bacillus subtilis (strain 168) GN=mtnW PE=1 SV=2	99	44186	47.15	ADALAIHEECVR
1007	1::sw|O31667|MTNX_BACSU	2-hydroxy-3-keto-5-methylthiopentenyl-1-phosphate phosphatase OS=Bacillus subtilis (strain 168) GN=mtnX PE=1 SV=1	31	27497	31	EVQEWLQNK
639	1::sw|O31669|MTND_BACSU	Acireductone dioxygenase OS=Bacillus subtilis (strain 168) GN=mtnD PE=3 SV=1	92	20811	25.43	YDLTEEEK
639	1::sw|O31669|MTND_BACSU	Acireductone dioxygenase OS=Bacillus subtilis (strain 168) GN=mtnD PE=3 SV=1	92	20811	35.39	LDELLENFK
639	1::sw|O31669|MTND_BACSU	Acireductone dioxygenase OS=Bacillus subtilis (strain 168) GN=mtnD PE=3 SV=1	92	20811	40.07	HYFTLQEDR
639	1::sw|O31669|MTND_BACSU	Acireductone dioxygenase OS=Bacillus subtilis (strain 168) GN=mtnD PE=3 SV=1	92	20811	48.73	QQILDTFETEIK
639	1::sw|O31669|MTND_BACSU	Acireductone dioxygenase OS=Bacillus subtilis (strain 168) GN=mtnD PE=3 SV=1	92	20811	22.88	LNPGDLISVPENIR
810	1::sw|O31671|KIND_BACSU	Sporulation kinase D OS=Bacillus subtilis (strain 168) GN=kinD PE=1 SV=1	57	57011	47.58	FSGLYFLNAK
810	1::sw|O31671|KIND_BACSU	Sporulation kinase D OS=Bacillus subtilis (strain 168) GN=kinD PE=1 SV=1	57	57011	26.86	QEASVLLNLHR
711	1::sw|O31675|QUEC_BACSU	7-cyano-7-deazaguanine synthase OS=Bacillus subtilis (strain 168) GN=queC PE=1 SV=1	76	24969	30.81	NDIEIEVK
711	1::sw|O31675|QUEC_BACSU	7-cyano-7-deazaguanine synthase OS=Bacillus subtilis (strain 168) GN=queC PE=1 SV=1	76	24969	67.53	LADELGALDFVK
855	1::sw|O31688|ZOSA_BACSU	Zinc-transporting ATPase OS=Bacillus subtilis (strain 168) GN=zosA PE=1 SV=1	50	68864	20.05	DQIRPEAK
855	1::sw|O31688|ZOSA_BACSU	Zinc-transporting ATPase OS=Bacillus subtilis (strain 168) GN=zosA PE=1 SV=1	50	68864	49.71	AGFIGEEMAAQFMK
501	1::sw|O31709|YKNW_BACSU	Uncharacterized protein YknW OS=Bacillus subtilis (strain 168) GN=yknW PE=4 SV=1	141	24217	35.75	METNVEK
501	1::sw|O31709|YKNW_BACSU	Uncharacterized protein YknW OS=Bacillus subtilis (strain 168) GN=yknW PE=4 SV=1	141	24217	28.83	METNVEK
501	1::sw|O31709|YKNW_BACSU	Uncharacterized protein YknW OS=Bacillus subtilis (strain 168) GN=yknW PE=4 SV=1	141	24217	37.56	METNVEK	Oxidation (M)
501	1::sw|O31709|YKNW_BACSU	Uncharacterized protein YknW OS=Bacillus subtilis (strain 168) GN=yknW PE=4 SV=1	141	24217	37.05	VSGGVTTYK
501	1::sw|O31709|YKNW_BACSU	Uncharacterized protein YknW OS=Bacillus subtilis (strain 168) GN=yknW PE=4 SV=1	141	24217	39.62	VSGGVTTYK
501	1::sw|O31709|YKNW_BACSU	Uncharacterized protein YknW OS=Bacillus subtilis (strain 168) GN=yknW PE=4 SV=1	141	24217	37.63	VSGGVTTYKK
501	1::sw|O31709|YKNW_BACSU	Uncharacterized protein YknW OS=Bacillus subtilis (strain 168) GN=yknW PE=4 SV=1	141	24217	33.06	PSLFGVITSPSVQFER
501	1::sw|O31709|YKNW_BACSU	Uncharacterized protein YknW OS=Bacillus subtilis (strain 168) GN=yknW PE=4 SV=1	141	24217	32.58	NSGTATEKPSLFGVITSPSVQFER
61	1::sw|O31710|YKNX_BACSU	Putative efflux system component YknX OS=Bacillus subtilis (strain 168) GN=yknX PE=1 SV=1	1295	41682	34.69	TAEIELK
61	1::sw|O31710|YKNX_BACSU	Putative efflux system component YknX OS=Bacillus subtilis (strain 168) GN=yknX PE=1 SV=1	1295	41682	44.81	KANTLPSK
61	1::sw|O31710|YKNX_BACSU	Putative efflux system component YknX OS=Bacillus subtilis (strain 168) GN=yknX PE=1 SV=1	1295	41682	38.03	KANTLPSK
61	1::sw|O31710|YKNX_BACSU	Putative efflux system component YknX OS=Bacillus subtilis (strain 168) GN=yknX PE=1 SV=1	1295	41682	20.71	KTAEIELK
61	1::sw|O31710|YKNX_BACSU	Putative efflux system component YknX OS=Bacillus subtilis (strain 168) GN=yknX PE=1 SV=1	1295	41682	22.35	KTAEIELK
61	1::sw|O31710|YKNX_BACSU	Putative efflux system component YknX OS=Bacillus subtilis (strain 168) GN=yknX PE=1 SV=1	1295	41682	40.92	LSEYDTLK
61	1::sw|O31710|YKNX_BACSU	Putative efflux system component YknX OS=Bacillus subtilis (strain 168) GN=yknX PE=1 SV=1	1295	41682	40.82	LSEYDTLK
61	1::sw|O31710|YKNX_BACSU	Putative efflux system component YknX OS=Bacillus subtilis (strain 168) GN=yknX PE=1 SV=1	1295	41682	40.54	LSEYDTLK
61	1::sw|O31710|YKNX_BACSU	Putative efflux system component YknX OS=Bacillus subtilis (strain 168) GN=yknX PE=1 SV=1	1295	41682	59.62	FIMNIETDK
61	1::sw|O31710|YKNX_BACSU	Putative efflux system component YknX OS=Bacillus subtilis (strain 168) GN=yknX PE=1 SV=1	1295	41682	44.36	LQIDQIQEK
61	1::sw|O31710|YKNX_BACSU	Putative efflux system component YknX OS=Bacillus subtilis (strain 168) GN=yknX PE=1 SV=1	1295	41682	56.46	LQIDQIQEK
61	1::sw|O31710|YKNX_BACSU	Putative efflux system component YknX OS=Bacillus subtilis (strain 168) GN=yknX PE=1 SV=1	1295	41682	32.44	LQIDQIQEK
61	1::sw|O31710|YKNX_BACSU	Putative efflux system component YknX OS=Bacillus subtilis (strain 168) GN=yknX PE=1 SV=1	1295	41682	37.25	LQIDQIQEK
61	1::sw|O31710|YKNX_BACSU	Putative efflux system component YknX OS=Bacillus subtilis (strain 168) GN=yknX PE=1 SV=1	1295	41682	40.08	LQIDQIQEK
61	1::sw|O31710|YKNX_BACSU	Putative efflux system component YknX OS=Bacillus subtilis (strain 168) GN=yknX PE=1 SV=1	1295	41682	39.07	LQIDQIQEK
61	1::sw|O31710|YKNX_BACSU	Putative efflux system component YknX OS=Bacillus subtilis (strain 168) GN=yknX PE=1 SV=1	1295	41682	45.73	LQIDQIQEK
61	1::sw|O31710|YKNX_BACSU	Putative efflux system component YknX OS=Bacillus subtilis (strain 168) GN=yknX PE=1 SV=1	1295	41682	43.51	LQIDQIQEK
61	1::sw|O31710|YKNX_BACSU	Putative efflux system component YknX OS=Bacillus subtilis (strain 168) GN=yknX PE=1 SV=1	1295	41682	26.35	LQIDQIQEK
61	1::sw|O31710|YKNX_BACSU	Putative efflux system component YknX OS=Bacillus subtilis (strain 168) GN=yknX PE=1 SV=1	1295	41682	24.83	FIMNIETDK	Oxidation (M)
61	1::sw|O31710|YKNX_BACSU	Putative efflux system component YknX OS=Bacillus subtilis (strain 168) GN=yknX PE=1 SV=1	1295	41682	30.1	GNLPEGKPGFK
61	1::sw|O31710|YKNX_BACSU	Putative efflux system component YknX OS=Bacillus subtilis (strain 168) GN=yknX PE=1 SV=1	1295	41682	30.37	VTLTSDVIQGK
61	1::sw|O31710|YKNX_BACSU	Putative efflux system component YknX OS=Bacillus subtilis (strain 168) GN=yknX PE=1 SV=1	1295	41682	46.06	VTLTSDVIQGK
61	1::sw|O31710|YKNX_BACSU	Putative efflux system component YknX OS=Bacillus subtilis (strain 168) GN=yknX PE=1 SV=1	1295	41682	39.39	VTLTSDVIQGK
61	1::sw|O31710|YKNX_BACSU	Putative efflux system component YknX OS=Bacillus subtilis (strain 168) GN=yknX PE=1 SV=1	1295	41682	50.82	VTLTSDVIQGK
61	1::sw|O31710|YKNX_BACSU	Putative efflux system component YknX OS=Bacillus subtilis (strain 168) GN=yknX PE=1 SV=1	1295	41682	60.34	EQNQLTSESNR
61	1::sw|O31710|YKNX_BACSU	Putative efflux system component YknX OS=Bacillus subtilis (strain 168) GN=yknX PE=1 SV=1	1295	41682	23.07	EQNQLTSESNR
61	1::sw|O31710|YKNX_BACSU	Putative efflux system component YknX OS=Bacillus subtilis (strain 168) GN=yknX PE=1 SV=1	1295	41682	30.22	EQNQLTSESNR
61	1::sw|O31710|YKNX_BACSU	Putative efflux system component YknX OS=Bacillus subtilis (strain 168) GN=yknX PE=1 SV=1	1295	41682	49.19	EQNQLTSESNR
61	1::sw|O31710|YKNX_BACSU	Putative efflux system component YknX OS=Bacillus subtilis (strain 168) GN=yknX PE=1 SV=1	1295	41682	58.66	EQNQLTSESNR
61	1::sw|O31710|YKNX_BACSU	Putative efflux system component YknX OS=Bacillus subtilis (strain 168) GN=yknX PE=1 SV=1	1295	41682	40.57	EQNQLTSESNR
61	1::sw|O31710|YKNX_BACSU	Putative efflux system component YknX OS=Bacillus subtilis (strain 168) GN=yknX PE=1 SV=1	1295	41682	67.36	IGEVTDDLTEIK
61	1::sw|O31710|YKNX_BACSU	Putative efflux system component YknX OS=Bacillus subtilis (strain 168) GN=yknX PE=1 SV=1	1295	41682	73.52	IGEVTDDLTEIK
61	1::sw|O31710|YKNX_BACSU	Putative efflux system component YknX OS=Bacillus subtilis (strain 168) GN=yknX PE=1 SV=1	1295	41682	19.28	IGEVTDDLTEIK
61	1::sw|O31710|YKNX_BACSU	Putative efflux system component YknX OS=Bacillus subtilis (strain 168) GN=yknX PE=1 SV=1	1295	41682	45.56	EDDQYYVYTVK
61	1::sw|O31710|YKNX_BACSU	Putative efflux system component YknX OS=Bacillus subtilis (strain 168) GN=yknX PE=1 SV=1	1295	41682	40.46	SDIQEPVIHIGNPK
61	1::sw|O31710|YKNX_BACSU	Putative efflux system component YknX OS=Bacillus subtilis (strain 168) GN=yknX PE=1 SV=1	1295	41682	26.83	SDIQEPVIHIGNPK
61	1::sw|O31710|YKNX_BACSU	Putative efflux system component YknX OS=Bacillus subtilis (strain 168) GN=yknX PE=1 SV=1	1295	41682	68.49	KEDDQYYVYTVK
61	1::sw|O31710|YKNX_BACSU	Putative efflux system component YknX OS=Bacillus subtilis (strain 168) GN=yknX PE=1 SV=1	1295	41682	30.76	KEDDQYYVYTVK
61	1::sw|O31710|YKNX_BACSU	Putative efflux system component YknX OS=Bacillus subtilis (strain 168) GN=yknX PE=1 SV=1	1295	41682	44.92	KEDDQYYVYTVK
61	1::sw|O31710|YKNX_BACSU	Putative efflux system component YknX OS=Bacillus subtilis (strain 168) GN=yknX PE=1 SV=1	1295	41682	26.37	KEDDQYYVYTVK
61	1::sw|O31710|YKNX_BACSU	Putative efflux system component YknX OS=Bacillus subtilis (strain 168) GN=yknX PE=1 SV=1	1295	41682	55.24	FSNEQYVFYEADK
61	1::sw|O31710|YKNX_BACSU	Putative efflux system component YknX OS=Bacillus subtilis (strain 168) GN=yknX PE=1 SV=1	1295	41682	34.75	KSDIQEPVIHIGNPK
61	1::sw|O31710|YKNX_BACSU	Putative efflux system component YknX OS=Bacillus subtilis (strain 168) GN=yknX PE=1 SV=1	1295	41682	38.96	KSDIQEPVIHIGNPK
61	1::sw|O31710|YKNX_BACSU	Putative efflux system component YknX OS=Bacillus subtilis (strain 168) GN=yknX PE=1 SV=1	1295	41682	20.74	KSDIQEPVIHIGNPK
61	1::sw|O31710|YKNX_BACSU	Putative efflux system component YknX OS=Bacillus subtilis (strain 168) GN=yknX PE=1 SV=1	1295	41682	27.97	KSDIQEPVIHIGNPK
61	1::sw|O31710|YKNX_BACSU	Putative efflux system component YknX OS=Bacillus subtilis (strain 168) GN=yknX PE=1 SV=1	1295	41682	28.82	KSDIQEPVIHIGNPK
61	1::sw|O31710|YKNX_BACSU	Putative efflux system component YknX OS=Bacillus subtilis (strain 168) GN=yknX PE=1 SV=1	1295	41682	38.19	KSDIQEPVIHIGNPK
61	1::sw|O31710|YKNX_BACSU	Putative efflux system component YknX OS=Bacillus subtilis (strain 168) GN=yknX PE=1 SV=1	1295	41682	55.88	KSDIQEPVIHIGNPK
61	1::sw|O31710|YKNX_BACSU	Putative efflux system component YknX OS=Bacillus subtilis (strain 168) GN=yknX PE=1 SV=1	1295	41682	36.99	KSDIQEPVIHIGNPK
61	1::sw|O31710|YKNX_BACSU	Putative efflux system component YknX OS=Bacillus subtilis (strain 168) GN=yknX PE=1 SV=1	1295	41682	85.32	SEIEGTVISVNQEAASK
61	1::sw|O31710|YKNX_BACSU	Putative efflux system component YknX OS=Bacillus subtilis (strain 168) GN=yknX PE=1 SV=1	1295	41682	56.61	SEIEGTVISVNQEAASK
61	1::sw|O31710|YKNX_BACSU	Putative efflux system component YknX OS=Bacillus subtilis (strain 168) GN=yknX PE=1 SV=1	1295	41682	72.89	SEIEGTVISVNQEAASK
61	1::sw|O31710|YKNX_BACSU	Putative efflux system component YknX OS=Bacillus subtilis (strain 168) GN=yknX PE=1 SV=1	1295	41682	90.27	GTALVTYTNEQLSLEK
61	1::sw|O31710|YKNX_BACSU	Putative efflux system component YknX OS=Bacillus subtilis (strain 168) GN=yknX PE=1 SV=1	1295	41682	35.88	KGTALVTYTNEQLSLEK
61	1::sw|O31710|YKNX_BACSU	Putative efflux system component YknX OS=Bacillus subtilis (strain 168) GN=yknX PE=1 SV=1	1295	41682	61.8	FSNEQYVFYEADKGTLEDIK
710	1::sw|O31711|YKNY_BACSU	Uncharacterized ABC transporter ATP-binding protein YknY OS=Bacillus subtilis (strain 168) GN=yknY PE=3 SV=1	76	25370	26.41	MIQLSNVR
710	1::sw|O31711|YKNY_BACSU	Uncharacterized ABC transporter ATP-binding protein YknY OS=Bacillus subtilis (strain 168) GN=yknY PE=3 SV=1	76	25370	33.02	NVELPMIYSGIGK
710	1::sw|O31711|YKNY_BACSU	Uncharacterized ABC transporter ATP-binding protein YknY OS=Bacillus subtilis (strain 168) GN=yknY PE=3 SV=1	76	25370	49.22	LILADEPTGALDTK
477	1::sw|O31712|YKNZ_BACSU	Uncharacterized ABC transporter permease YknZ OS=Bacillus subtilis (strain 168) GN=yknZ PE=1 SV=1	151	42155	41.13	LDPIEALR
477	1::sw|O31712|YKNZ_BACSU	Uncharacterized ABC transporter permease YknZ OS=Bacillus subtilis (strain 168) GN=yknZ PE=1 SV=1	151	42155	52.55	LDPIEALR
477	1::sw|O31712|YKNZ_BACSU	Uncharacterized ABC transporter permease YknZ OS=Bacillus subtilis (strain 168) GN=yknZ PE=1 SV=1	151	42155	19.76	MALSSVLAHK	Oxidation (M)
477	1::sw|O31712|YKNZ_BACSU	Uncharacterized ABC transporter permease YknZ OS=Bacillus subtilis (strain 168) GN=yknZ PE=1 SV=1	151	42155	25	QVVASTSESMK
477	1::sw|O31712|YKNZ_BACSU	Uncharacterized ABC transporter permease YknZ OS=Bacillus subtilis (strain 168) GN=yknZ PE=1 SV=1	151	42155	31.87	QVVASTSESMK
477	1::sw|O31712|YKNZ_BACSU	Uncharacterized ABC transporter permease YknZ OS=Bacillus subtilis (strain 168) GN=yknZ PE=1 SV=1	151	42155	32.51	QVVASTSESMK	Oxidation (M)
477	1::sw|O31712|YKNZ_BACSU	Uncharacterized ABC transporter permease YknZ OS=Bacillus subtilis (strain 168) GN=yknZ PE=1 SV=1	151	42155	38.06	TFTDNDFLAGNR
477	1::sw|O31712|YKNZ_BACSU	Uncharacterized ABC transporter permease YknZ OS=Bacillus subtilis (strain 168) GN=yknZ PE=1 SV=1	151	42155	24.4	TFTDNDFLAGNR
477	1::sw|O31712|YKNZ_BACSU	Uncharacterized ABC transporter permease YknZ OS=Bacillus subtilis (strain 168) GN=yknZ PE=1 SV=1	151	42155	43.56	TFTDNDFLAGNR
525	1::sw|O31716|YKPA_BACSU	Uncharacterized ABC transporter ATP-binding protein YkpA OS=Bacillus subtilis (strain 168) GN=ykpA PE=3 SV=1	133	61188	38.11	QLQEFVAR
525	1::sw|O31716|YKPA_BACSU	Uncharacterized ABC transporter ATP-binding protein YkpA OS=Bacillus subtilis (strain 168) GN=ykpA PE=3 SV=1	133	61188	35.56	NELAVTTLFK
525	1::sw|O31716|YKPA_BACSU	Uncharacterized ABC transporter ATP-binding protein YkpA OS=Bacillus subtilis (strain 168) GN=ykpA PE=3 SV=1	133	61188	25.29	GLGISEDLHTK
525	1::sw|O31716|YKPA_BACSU	Uncharacterized ABC transporter ATP-binding protein YkpA OS=Bacillus subtilis (strain 168) GN=ykpA PE=3 SV=1	133	61188	27.77	ITLDDIKPSSR
525	1::sw|O31716|YKPA_BACSU	Uncharacterized ABC transporter ATP-binding protein YkpA OS=Bacillus subtilis (strain 168) GN=ykpA PE=3 SV=1	133	61188	26.15	VLDNVSFIMNR
525	1::sw|O31716|YKPA_BACSU	Uncharacterized ABC transporter ATP-binding protein YkpA OS=Bacillus subtilis (strain 168) GN=ykpA PE=3 SV=1	133	61188	69.8	WGVTTSQAYFPK
525	1::sw|O31716|YKPA_BACSU	Uncharacterized ABC transporter ATP-binding protein YkpA OS=Bacillus subtilis (strain 168) GN=ykpA PE=3 SV=1	133	61188	23.62	VLSGEIEPQTGDVHMSPGER
444	1::sw|O31723|YLMA_BACSU	Uncharacterized ABC transporter ATP-binding protein YlmA OS=Bacillus subtilis (strain 168) GN=ylmA PE=2 SV=2	164	29738	58.47	IGLVSAALQQK
444	1::sw|O31723|YLMA_BACSU	Uncharacterized ABC transporter ATP-binding protein YlmA OS=Bacillus subtilis (strain 168) GN=ylmA PE=2 SV=2	164	29738	30.82	QGEVFGSGEIK
444	1::sw|O31723|YLMA_BACSU	Uncharacterized ABC transporter ATP-binding protein YlmA OS=Bacillus subtilis (strain 168) GN=ylmA PE=2 SV=2	164	29738	28.73	RYETLSQGEK
444	1::sw|O31723|YLMA_BACSU	Uncharacterized ABC transporter ATP-binding protein YlmA OS=Bacillus subtilis (strain 168) GN=ylmA PE=2 SV=2	164	29738	62.24	LLDTITYIANK
444	1::sw|O31723|YLMA_BACSU	Uncharacterized ABC transporter ATP-binding protein YlmA OS=Bacillus subtilis (strain 168) GN=ylmA PE=2 SV=2	164	29738	69.45	MILQLDNVSLK
1035	1::sw|O31724|FAPD_BACSU	N-formyl-4-amino-5-aminomethyl-2-methylpyrimidine deformylase OS=Bacillus subtilis (strain 168) GN=ylmB PE=3 SV=2	28	47523	27.85	SSQTFHDGTR
1028	1::sw|O31728|SEPF_BACSU	Cell division protein SepF OS=Bacillus subtilis (strain 168) GN=sepF PE=1 SV=3	29	17433	28.68	QNVVSLQSVQK
446	1::sw|O31729|YLMG_BACSU	Uncharacterized membrane protein YlmG OS=Bacillus subtilis (strain 168) GN=ylmG PE=3 SV=1	163	10358	27.12	FATTGLWGLYR
446	1::sw|O31729|YLMG_BACSU	Uncharacterized membrane protein YlmG OS=Bacillus subtilis (strain 168) GN=ylmG PE=3 SV=1	163	10358	58.46	FATTGLWGLYR
446	1::sw|O31729|YLMG_BACSU	Uncharacterized membrane protein YlmG OS=Bacillus subtilis (strain 168) GN=ylmG PE=3 SV=1	163	10358	66.8	FATTGLWGLYR
446	1::sw|O31729|YLMG_BACSU	Uncharacterized membrane protein YlmG OS=Bacillus subtilis (strain 168) GN=ylmG PE=3 SV=1	163	10358	43.35	FLASICEPYLEPFR
446	1::sw|O31729|YLMG_BACSU	Uncharacterized membrane protein YlmG OS=Bacillus subtilis (strain 168) GN=ylmG PE=3 SV=1	163	10358	24.91	IIPPIAMLDISPIVAILVLR
446	1::sw|O31729|YLMG_BACSU	Uncharacterized membrane protein YlmG OS=Bacillus subtilis (strain 168) GN=ylmG PE=3 SV=1	163	10358	40.91	IIPPIAMLDISPIVAILVLR	Oxidation (M)
231	1::sw|O31742|RL19_BACSU	50S ribosomal protein L19 OS=Bacillus subtilis (strain 168) GN=rplS PE=1 SV=2	404	13379	27.17	LIEDITK
231	1::sw|O31742|RL19_BACSU	50S ribosomal protein L19 OS=Bacillus subtilis (strain 168) GN=rplS PE=1 SV=2	404	13379	18.59	LIEDITK
231	1::sw|O31742|RL19_BACSU	50S ribosomal protein L19 OS=Bacillus subtilis (strain 168) GN=rplS PE=1 SV=2	404	13379	43.52	LIEDITK
231	1::sw|O31742|RL19_BACSU	50S ribosomal protein L19 OS=Bacillus subtilis (strain 168) GN=rplS PE=1 SV=2	404	13379	64.06	ISYGVGVER
231	1::sw|O31742|RL19_BACSU	50S ribosomal protein L19 OS=Bacillus subtilis (strain 168) GN=rplS PE=1 SV=2	404	13379	69.1	ISYGVGVER
231	1::sw|O31742|RL19_BACSU	50S ribosomal protein L19 OS=Bacillus subtilis (strain 168) GN=rplS PE=1 SV=2	404	13379	68.89	ISYGVGVER
231	1::sw|O31742|RL19_BACSU	50S ribosomal protein L19 OS=Bacillus subtilis (strain 168) GN=rplS PE=1 SV=2	404	13379	35.92	KISYGVGVER
231	1::sw|O31742|RL19_BACSU	50S ribosomal protein L19 OS=Bacillus subtilis (strain 168) GN=rplS PE=1 SV=2	404	13379	44.65	KISYGVGVER
231	1::sw|O31742|RL19_BACSU	50S ribosomal protein L19 OS=Bacillus subtilis (strain 168) GN=rplS PE=1 SV=2	404	13379	51.85	GGGISETFTVR
231	1::sw|O31742|RL19_BACSU	50S ribosomal protein L19 OS=Bacillus subtilis (strain 168) GN=rplS PE=1 SV=2	404	13379	40.09	GGGISETFTVR
231	1::sw|O31742|RL19_BACSU	50S ribosomal protein L19 OS=Bacillus subtilis (strain 168) GN=rplS PE=1 SV=2	404	13379	46.32	IQIFEGVVIK
231	1::sw|O31742|RL19_BACSU	50S ribosomal protein L19 OS=Bacillus subtilis (strain 168) GN=rplS PE=1 SV=2	404	13379	54.04	IQIFEGVVIK
231	1::sw|O31742|RL19_BACSU	50S ribosomal protein L19 OS=Bacillus subtilis (strain 168) GN=rplS PE=1 SV=2	404	13379	52.8	IQIFEGVVIK
231	1::sw|O31742|RL19_BACSU	50S ribosomal protein L19 OS=Bacillus subtilis (strain 168) GN=rplS PE=1 SV=2	404	13379	39.4	RGGGISETFTVR
231	1::sw|O31742|RL19_BACSU	50S ribosomal protein L19 OS=Bacillus subtilis (strain 168) GN=rplS PE=1 SV=2	404	13379	34.55	RGGGISETFTVR
231	1::sw|O31742|RL19_BACSU	50S ribosomal protein L19 OS=Bacillus subtilis (strain 168) GN=rplS PE=1 SV=2	404	13379	18.35	RGGGISETFTVR
231	1::sw|O31742|RL19_BACSU	50S ribosomal protein L19 OS=Bacillus subtilis (strain 168) GN=rplS PE=1 SV=2	404	13379	30.56	TDLPAFRPGDTLR
231	1::sw|O31742|RL19_BACSU	50S ribosomal protein L19 OS=Bacillus subtilis (strain 168) GN=rplS PE=1 SV=2	404	13379	26.87	TDLPAFRPGDTLR
741	1::sw|O31743|RBGA_BACSU	Ribosome biogenesis GTPase A OS=Bacillus subtilis (strain 168) GN=rbgA PE=1 SV=1	71	32023	70.63	LIDIVYELVDAR
962	1::sw|O31745|YLQG_BACSU	Uncharacterized protein YlqG OS=Bacillus subtilis (strain 168) GN=ylqG PE=4 SV=1	37	63103	36.64	APSPTNTAGSR
248	1::sw|O31749|PYRH_BACSU	Uridylate kinase OS=Bacillus subtilis (strain 168) GN=pyrH PE=1 SV=2	375	26124	66.01	TGSDLGMDR
248	1::sw|O31749|PYRH_BACSU	Uridylate kinase OS=Bacillus subtilis (strain 168) GN=pyrH PE=1 SV=2	375	26124	39.77	VQTSIEMR
248	1::sw|O31749|PYRH_BACSU	Uridylate kinase OS=Bacillus subtilis (strain 168) GN=pyrH PE=1 SV=2	375	26124	40.21	VQTSIEMR
248	1::sw|O31749|PYRH_BACSU	Uridylate kinase OS=Bacillus subtilis (strain 168) GN=pyrH PE=1 SV=2	375	26124	49.41	TGSDLGMDR	Oxidation (M)
248	1::sw|O31749|PYRH_BACSU	Uridylate kinase OS=Bacillus subtilis (strain 168) GN=pyrH PE=1 SV=2	375	26124	41.7	AVIGESIGTIVR
248	1::sw|O31749|PYRH_BACSU	Uridylate kinase OS=Bacillus subtilis (strain 168) GN=pyrH PE=1 SV=2	375	26124	94.76	AVIGESIGTIVR
248	1::sw|O31749|PYRH_BACSU	Uridylate kinase OS=Bacillus subtilis (strain 168) GN=pyrH PE=1 SV=2	375	26124	38.9	YESLSYLDVLK
248	1::sw|O31749|PYRH_BACSU	Uridylate kinase OS=Bacillus subtilis (strain 168) GN=pyrH PE=1 SV=2	375	26124	41.33	YESLSYLDVLK
248	1::sw|O31749|PYRH_BACSU	Uridylate kinase OS=Bacillus subtilis (strain 168) GN=pyrH PE=1 SV=2	375	26124	45.84	YESLSYLDVLK
248	1::sw|O31749|PYRH_BACSU	Uridylate kinase OS=Bacillus subtilis (strain 168) GN=pyrH PE=1 SV=2	375	26124	68.04	NNVDGVYNADPR
248	1::sw|O31749|PYRH_BACSU	Uridylate kinase OS=Bacillus subtilis (strain 168) GN=pyrH PE=1 SV=2	375	26124	53.16	NNVDGVYNADPR
574	1::sw|O31751|ISPT_BACSU	Isoprenyl transferase OS=Bacillus subtilis (strain 168) GN=uppS PE=3 SV=1	114	29758	47.03	NQQTAASNLER
574	1::sw|O31751|ISPT_BACSU	Isoprenyl transferase OS=Bacillus subtilis (strain 168) GN=uppS PE=3 SV=1	114	29758	52.55	IIGDETALPAHTLR
574	1::sw|O31751|ISPT_BACSU	Isoprenyl transferase OS=Bacillus subtilis (strain 168) GN=uppS PE=3 SV=1	114	29758	35.72	IIGDETALPAHTLR
574	1::sw|O31751|ISPT_BACSU	Isoprenyl transferase OS=Bacillus subtilis (strain 168) GN=uppS PE=3 SV=1	114	29758	38.67	VLTLYAFSTENWK
594	1::sw|O31753|DXR_BACSU	1-deoxy-D-xylulose 5-phosphate reductoisomerase OS=Bacillus subtilis (strain 168) GN=dxr PE=3 SV=2	106	42738	37.4	ETLVTAGHIVK
594	1::sw|O31753|DXR_BACSU	1-deoxy-D-xylulose 5-phosphate reductoisomerase OS=Bacillus subtilis (strain 168) GN=dxr PE=3 SV=2	106	42738	39.52	FVSVGDLDTYHK
594	1::sw|O31753|DXR_BACSU	1-deoxy-D-xylulose 5-phosphate reductoisomerase OS=Bacillus subtilis (strain 168) GN=dxr PE=3 SV=2	106	42738	45.29	IPFLAIEDCIEK
594	1::sw|O31753|DXR_BACSU	1-deoxy-D-xylulose 5-phosphate reductoisomerase OS=Bacillus subtilis (strain 168) GN=dxr PE=3 SV=2	106	42738	39.49	RLELWEIGSLHFEK
158	1::sw|O31754|RASP_BACSU	Zinc metalloprotease RasP OS=Bacillus subtilis (strain 168) GN=rasP PE=1 SV=1	625	46771	36.25	AILTNLSK
158	1::sw|O31754|RASP_BACSU	Zinc metalloprotease RasP OS=Bacillus subtilis (strain 168) GN=rasP PE=1 SV=1	625	46771	21.37	AILTNLSK
158	1::sw|O31754|RASP_BACSU	Zinc metalloprotease RasP OS=Bacillus subtilis (strain 168) GN=rasP PE=1 SV=1	625	46771	19.81	LLPVGGFVR
158	1::sw|O31754|RASP_BACSU	Zinc metalloprotease RasP OS=Bacillus subtilis (strain 168) GN=rasP PE=1 SV=1	625	46771	22.37	LLPVGGFVR
158	1::sw|O31754|RASP_BACSU	Zinc metalloprotease RasP OS=Bacillus subtilis (strain 168) GN=rasP PE=1 SV=1	625	46771	27.74	EFAIGFGPK
158	1::sw|O31754|RASP_BACSU	Zinc metalloprotease RasP OS=Bacillus subtilis (strain 168) GN=rasP PE=1 SV=1	625	46771	29.2	NETVYTIR
158	1::sw|O31754|RASP_BACSU	Zinc metalloprotease RasP OS=Bacillus subtilis (strain 168) GN=rasP PE=1 SV=1	625	46771	35.99	FGSYAPTEK
158	1::sw|O31754|RASP_BACSU	Zinc metalloprotease RasP OS=Bacillus subtilis (strain 168) GN=rasP PE=1 SV=1	625	46771	36.05	FGSYAPTEK
158	1::sw|O31754|RASP_BACSU	Zinc metalloprotease RasP OS=Bacillus subtilis (strain 168) GN=rasP PE=1 SV=1	625	46771	32.86	FGSYAPTEK
158	1::sw|O31754|RASP_BACSU	Zinc metalloprotease RasP OS=Bacillus subtilis (strain 168) GN=rasP PE=1 SV=1	625	46771	53.18	SWTDIVSAVK
158	1::sw|O31754|RASP_BACSU	Zinc metalloprotease RasP OS=Bacillus subtilis (strain 168) GN=rasP PE=1 SV=1	625	46771	37.52	KNETVYTIR
158	1::sw|O31754|RASP_BACSU	Zinc metalloprotease RasP OS=Bacillus subtilis (strain 168) GN=rasP PE=1 SV=1	625	46771	64.91	KNETVYTIR
158	1::sw|O31754|RASP_BACSU	Zinc metalloprotease RasP OS=Bacillus subtilis (strain 168) GN=rasP PE=1 SV=1	625	46771	41.59	KNETVYTIR
158	1::sw|O31754|RASP_BACSU	Zinc metalloprotease RasP OS=Bacillus subtilis (strain 168) GN=rasP PE=1 SV=1	625	46771	24.93	LLFLFIEAIR
158	1::sw|O31754|RASP_BACSU	Zinc metalloprotease RasP OS=Bacillus subtilis (strain 168) GN=rasP PE=1 SV=1	625	46771	66.98	LLFLFIEAIR
158	1::sw|O31754|RASP_BACSU	Zinc metalloprotease RasP OS=Bacillus subtilis (strain 168) GN=rasP PE=1 SV=1	625	46771	89.79	LLFLFIEAIR
158	1::sw|O31754|RASP_BACSU	Zinc metalloprotease RasP OS=Bacillus subtilis (strain 168) GN=rasP PE=1 SV=1	625	46771	31.18	TLHISVTPEAVK
158	1::sw|O31754|RASP_BACSU	Zinc metalloprotease RasP OS=Bacillus subtilis (strain 168) GN=rasP PE=1 SV=1	625	46771	42.4	TLHISVTPEAVK
158	1::sw|O31754|RASP_BACSU	Zinc metalloprotease RasP OS=Bacillus subtilis (strain 168) GN=rasP PE=1 SV=1	625	46771	57.78	EGDYIQSINGEK
158	1::sw|O31754|RASP_BACSU	Zinc metalloprotease RasP OS=Bacillus subtilis (strain 168) GN=rasP PE=1 SV=1	625	46771	38.55	ENPEKEMDVAVK
158	1::sw|O31754|RASP_BACSU	Zinc metalloprotease RasP OS=Bacillus subtilis (strain 168) GN=rasP PE=1 SV=1	625	46771	57.94	GVLSAVAYGATSTVDVTK
158	1::sw|O31754|RASP_BACSU	Zinc metalloprotease RasP OS=Bacillus subtilis (strain 168) GN=rasP PE=1 SV=1	625	46771	83.72	GVLSAVAYGATSTVDVTK
158	1::sw|O31754|RASP_BACSU	Zinc metalloprotease RasP OS=Bacillus subtilis (strain 168) GN=rasP PE=1 SV=1	625	46771	22.07	GVLSAVAYGATSTVDVTK
158	1::sw|O31754|RASP_BACSU	Zinc metalloprotease RasP OS=Bacillus subtilis (strain 168) GN=rasP PE=1 SV=1	625	46771	48.18	LDMLSGPVGIYDMTDQVAK
158	1::sw|O31754|RASP_BACSU	Zinc metalloprotease RasP OS=Bacillus subtilis (strain 168) GN=rasP PE=1 SV=1	625	46771	41.91	EKYPDALVIEVETADLEHDMK
158	1::sw|O31754|RASP_BACSU	Zinc metalloprotease RasP OS=Bacillus subtilis (strain 168) GN=rasP PE=1 SV=1	625	46771	67.16	MAGEDPEMIEVKPGYTVGLLFNK
635	1::sw|O31755|SYP_BACSU	Proline--tRNA ligase OS=Bacillus subtilis (strain 168) GN=proS PE=3 SV=1	93	63436	34.98	FVLVLVR
635	1::sw|O31755|SYP_BACSU	Proline--tRNA ligase OS=Bacillus subtilis (strain 168) GN=proS PE=3 SV=1	93	63436	20.1	SHQLLLR
635	1::sw|O31755|SYP_BACSU	Proline--tRNA ligase OS=Bacillus subtilis (strain 168) GN=proS PE=3 SV=1	93	63436	20.48	EGDPSPDGK
635	1::sw|O31755|SYP_BACSU	Proline--tRNA ligase OS=Bacillus subtilis (strain 168) GN=proS PE=3 SV=1	93	63436	25.73	GDHEVNDIK
635	1::sw|O31755|SYP_BACSU	Proline--tRNA ligase OS=Bacillus subtilis (strain 168) GN=proS PE=3 SV=1	93	63436	21.56	GDHEVNDIK
635	1::sw|O31755|SYP_BACSU	Proline--tRNA ligase OS=Bacillus subtilis (strain 168) GN=proS PE=3 SV=1	93	63436	22.57	PVIADSGAMGGK
635	1::sw|O31755|SYP_BACSU	Proline--tRNA ligase OS=Bacillus subtilis (strain 168) GN=proS PE=3 SV=1	93	63436	44.25	FADSDLIGLPIR
635	1::sw|O31755|SYP_BACSU	Proline--tRNA ligase OS=Bacillus subtilis (strain 168) GN=proS PE=3 SV=1	93	63436	54.03	FAEGIEVGQVFK
355	1::sw|O31760|RNJ2_BACSU	Ribonuclease J 2 OS=Bacillus subtilis (strain 168) GN=rnjB PE=1 SV=3	228	61251	49.16	AGAQVIFAQK
355	1::sw|O31760|RNJ2_BACSU	Ribonuclease J 2 OS=Bacillus subtilis (strain 168) GN=rnjB PE=1 SV=3	228	61251	77.74	IIALGGVGEIGK
355	1::sw|O31760|RNJ2_BACSU	Ribonuclease J 2 OS=Bacillus subtilis (strain 168) GN=rnjB PE=1 SV=3	228	61251	38	NLQSVLQLAR
355	1::sw|O31760|RNJ2_BACSU	Ribonuclease J 2 OS=Bacillus subtilis (strain 168) GN=rnjB PE=1 SV=3	228	61251	21.94	HLVSGPEIITR
355	1::sw|O31760|RNJ2_BACSU	Ribonuclease J 2 OS=Bacillus subtilis (strain 168) GN=rnjB PE=1 SV=3	228	61251	47.57	HLVSGPEIITR
355	1::sw|O31760|RNJ2_BACSU	Ribonuclease J 2 OS=Bacillus subtilis (strain 168) GN=rnjB PE=1 SV=3	228	61251	55.25	DALNQFLYEK
355	1::sw|O31760|RNJ2_BACSU	Ribonuclease J 2 OS=Bacillus subtilis (strain 168) GN=rnjB PE=1 SV=3	228	61251	61.82	VIIAVFASNINR
982	1::sw|O31764|YMFF_BACSU	Probable inactive metalloprotease YmfF OS=Bacillus subtilis (strain 168) GN=ymfF PE=3 SV=2	34	48231	33.97	ASLAYYAASR
982	1::sw|O31764|YMFF_BACSU	Probable inactive metalloprotease YmfF OS=Bacillus subtilis (strain 168) GN=ymfF PE=3 SV=2	34	48231	18.93	RALLPHVLLR
982	1::sw|O31764|YMFF_BACSU	Probable inactive metalloprotease YmfF OS=Bacillus subtilis (strain 168) GN=ymfF PE=3 SV=2	34	48231	19.86	RALLPHVLLR
272	1::sw|O31771|YMFM_BACSU	Uncharacterized membrane protein YmfM OS=Bacillus subtilis (strain 168) GN=ymfM PE=4 SV=3	333	32416	36.19	TGYAPNLK
272	1::sw|O31771|YMFM_BACSU	Uncharacterized membrane protein YmfM OS=Bacillus subtilis (strain 168) GN=ymfM PE=4 SV=3	333	32416	27.54	EMPKPASK
272	1::sw|O31771|YMFM_BACSU	Uncharacterized membrane protein YmfM OS=Bacillus subtilis (strain 168) GN=ymfM PE=4 SV=3	333	32416	39.08	ISGMNLQK
272	1::sw|O31771|YMFM_BACSU	Uncharacterized membrane protein YmfM OS=Bacillus subtilis (strain 168) GN=ymfM PE=4 SV=3	333	32416	55.4	ISGMNLQK
272	1::sw|O31771|YMFM_BACSU	Uncharacterized membrane protein YmfM OS=Bacillus subtilis (strain 168) GN=ymfM PE=4 SV=3	333	32416	35.87	ISGMNLQK	Oxidation (M)
272	1::sw|O31771|YMFM_BACSU	Uncharacterized membrane protein YmfM OS=Bacillus subtilis (strain 168) GN=ymfM PE=4 SV=3	333	32416	62.28	ASDSSWIR
272	1::sw|O31771|YMFM_BACSU	Uncharacterized membrane protein YmfM OS=Bacillus subtilis (strain 168) GN=ymfM PE=4 SV=3	333	32416	49	VLSYELDPK
272	1::sw|O31771|YMFM_BACSU	Uncharacterized membrane protein YmfM OS=Bacillus subtilis (strain 168) GN=ymfM PE=4 SV=3	333	32416	34.74	VRDENSSSLK
272	1::sw|O31771|YMFM_BACSU	Uncharacterized membrane protein YmfM OS=Bacillus subtilis (strain 168) GN=ymfM PE=4 SV=3	333	32416	46.08	VRDENSSSLK
272	1::sw|O31771|YMFM_BACSU	Uncharacterized membrane protein YmfM OS=Bacillus subtilis (strain 168) GN=ymfM PE=4 SV=3	333	32416	28.96	VRDENSSSLK
272	1::sw|O31771|YMFM_BACSU	Uncharacterized membrane protein YmfM OS=Bacillus subtilis (strain 168) GN=ymfM PE=4 SV=3	333	32416	24.14	VRDENSSSLK
272	1::sw|O31771|YMFM_BACSU	Uncharacterized membrane protein YmfM OS=Bacillus subtilis (strain 168) GN=ymfM PE=4 SV=3	333	32416	31.68	ENDSEKLEIK
272	1::sw|O31771|YMFM_BACSU	Uncharacterized membrane protein YmfM OS=Bacillus subtilis (strain 168) GN=ymfM PE=4 SV=3	333	32416	42.54	DIPNTYHDDVSEK
272	1::sw|O31771|YMFM_BACSU	Uncharacterized membrane protein YmfM OS=Bacillus subtilis (strain 168) GN=ymfM PE=4 SV=3	333	32416	29.84	DIPNTYHDDVSEK
272	1::sw|O31771|YMFM_BACSU	Uncharacterized membrane protein YmfM OS=Bacillus subtilis (strain 168) GN=ymfM PE=4 SV=3	333	32416	50.24	AAGTEGSLTTYEVSGADK
272	1::sw|O31771|YMFM_BACSU	Uncharacterized membrane protein YmfM OS=Bacillus subtilis (strain 168) GN=ymfM PE=4 SV=3	333	32416	36.11	YLTALEEGNYDIIPGK
272	1::sw|O31771|YMFM_BACSU	Uncharacterized membrane protein YmfM OS=Bacillus subtilis (strain 168) GN=ymfM PE=4 SV=3	333	32416	60.1	AAGTEGSLTTYEVSGADKIELELK
474	1::sw|O31773|PBPX_BACSU	Putative penicillin-binding protein PbpX OS=Bacillus subtilis (strain 168) GN=pbpX PE=2 SV=1	152	43887	18.04	TVDRNQK
474	1::sw|O31773|PBPX_BACSU	Putative penicillin-binding protein PbpX OS=Bacillus subtilis (strain 168) GN=pbpX PE=2 SV=1	152	43887	20.15	FDQALIDGK
474	1::sw|O31773|PBPX_BACSU	Putative penicillin-binding protein PbpX OS=Bacillus subtilis (strain 168) GN=pbpX PE=2 SV=1	152	43887	58.04	EIGFSGTAMIVR
474	1::sw|O31773|PBPX_BACSU	Putative penicillin-binding protein PbpX OS=Bacillus subtilis (strain 168) GN=pbpX PE=2 SV=1	152	43887	115.72	ALIATAILQLEEK
96	1::sw|O31774|RNY_BACSU	Ribonuclease Y OS=Bacillus subtilis (strain 168) GN=rny PE=1 SV=1	944	58940	42.58	SFAIQAGR
96	1::sw|O31774|RNY_BACSU	Ribonuclease Y OS=Bacillus subtilis (strain 168) GN=rny PE=1 SV=1	944	58940	23.51	SFAIQAGR
96	1::sw|O31774|RNY_BACSU	Ribonuclease Y OS=Bacillus subtilis (strain 168) GN=rny PE=1 SV=1	944	58940	28.18	SFAIQAGR
96	1::sw|O31774|RNY_BACSU	Ribonuclease Y OS=Bacillus subtilis (strain 168) GN=rny PE=1 SV=1	944	58940	28.72	DHSLNER
96	1::sw|O31774|RNY_BACSU	Ribonuclease Y OS=Bacillus subtilis (strain 168) GN=rny PE=1 SV=1	944	58940	31.88	DHSLNER
96	1::sw|O31774|RNY_BACSU	Ribonuclease Y OS=Bacillus subtilis (strain 168) GN=rny PE=1 SV=1	944	58940	37.53	IEEMVEK
96	1::sw|O31774|RNY_BACSU	Ribonuclease Y OS=Bacillus subtilis (strain 168) GN=rny PE=1 SV=1	944	58940	30.18	KEALLEAK
96	1::sw|O31774|RNY_BACSU	Ribonuclease Y OS=Bacillus subtilis (strain 168) GN=rny PE=1 SV=1	944	58940	26.83	KEALLEAK
96	1::sw|O31774|RNY_BACSU	Ribonuclease Y OS=Bacillus subtilis (strain 168) GN=rny PE=1 SV=1	944	58940	24.03	KEALLEAK
96	1::sw|O31774|RNY_BACSU	Ribonuclease Y OS=Bacillus subtilis (strain 168) GN=rny PE=1 SV=1	944	58940	52.38	AGLLHDIGK
96	1::sw|O31774|RNY_BACSU	Ribonuclease Y OS=Bacillus subtilis (strain 168) GN=rny PE=1 SV=1	944	58940	47.09	AGLLHDIGK
96	1::sw|O31774|RNY_BACSU	Ribonuclease Y OS=Bacillus subtilis (strain 168) GN=rny PE=1 SV=1	944	58940	54.95	IDAEQEVR
96	1::sw|O31774|RNY_BACSU	Ribonuclease Y OS=Bacillus subtilis (strain 168) GN=rny PE=1 SV=1	944	58940	45.3	TSYGQNVLK
96	1::sw|O31774|RNY_BACSU	Ribonuclease Y OS=Bacillus subtilis (strain 168) GN=rny PE=1 SV=1	944	58940	60.89	MQQSELER
96	1::sw|O31774|RNY_BACSU	Ribonuclease Y OS=Bacillus subtilis (strain 168) GN=rny PE=1 SV=1	944	58940	65.74	MQQSELER
96	1::sw|O31774|RNY_BACSU	Ribonuclease Y OS=Bacillus subtilis (strain 168) GN=rny PE=1 SV=1	944	58940	39.99	MQQSELER
96	1::sw|O31774|RNY_BACSU	Ribonuclease Y OS=Bacillus subtilis (strain 168) GN=rny PE=1 SV=1	944	58940	46.79	MQQSELER
96	1::sw|O31774|RNY_BACSU	Ribonuclease Y OS=Bacillus subtilis (strain 168) GN=rny PE=1 SV=1	944	58940	41.53	NILSLALQR
96	1::sw|O31774|RNY_BACSU	Ribonuclease Y OS=Bacillus subtilis (strain 168) GN=rny PE=1 SV=1	944	58940	59.71	NILSLALQR
96	1::sw|O31774|RNY_BACSU	Ribonuclease Y OS=Bacillus subtilis (strain 168) GN=rny PE=1 SV=1	944	58940	68.06	NILSLALQR
96	1::sw|O31774|RNY_BACSU	Ribonuclease Y OS=Bacillus subtilis (strain 168) GN=rny PE=1 SV=1	944	58940	46.41	NILSLALQR
96	1::sw|O31774|RNY_BACSU	Ribonuclease Y OS=Bacillus subtilis (strain 168) GN=rny PE=1 SV=1	944	58940	29.19	MQQSELER	Oxidation (M)
96	1::sw|O31774|RNY_BACSU	Ribonuclease Y OS=Bacillus subtilis (strain 168) GN=rny PE=1 SV=1	944	58940	40.35	SETLENYIR
96	1::sw|O31774|RNY_BACSU	Ribonuclease Y OS=Bacillus subtilis (strain 168) GN=rny PE=1 SV=1	944	58940	53.63	GAAEQILEDAK
96	1::sw|O31774|RNY_BACSU	Ribonuclease Y OS=Bacillus subtilis (strain 168) GN=rny PE=1 SV=1	944	58940	57.03	GAAEQILEDAK
96	1::sw|O31774|RNY_BACSU	Ribonuclease Y OS=Bacillus subtilis (strain 168) GN=rny PE=1 SV=1	944	58940	33.53	GAAEQILEDAK
96	1::sw|O31774|RNY_BACSU	Ribonuclease Y OS=Bacillus subtilis (strain 168) GN=rny PE=1 SV=1	944	58940	39.46	GAAEQILEDAK
96	1::sw|O31774|RNY_BACSU	Ribonuclease Y OS=Bacillus subtilis (strain 168) GN=rny PE=1 SV=1	944	58940	26.64	QQHIEEMESK
96	1::sw|O31774|RNY_BACSU	Ribonuclease Y OS=Bacillus subtilis (strain 168) GN=rny PE=1 SV=1	944	58940	23.35	GAAEQILEDAKR
96	1::sw|O31774|RNY_BACSU	Ribonuclease Y OS=Bacillus subtilis (strain 168) GN=rny PE=1 SV=1	944	58940	54.54	GAAEQILEDAKR
96	1::sw|O31774|RNY_BACSU	Ribonuclease Y OS=Bacillus subtilis (strain 168) GN=rny PE=1 SV=1	944	58940	28.5	GAAEQILEDAKR
96	1::sw|O31774|RNY_BACSU	Ribonuclease Y OS=Bacillus subtilis (strain 168) GN=rny PE=1 SV=1	944	58940	32.02	GAAEQILEDAKR
96	1::sw|O31774|RNY_BACSU	Ribonuclease Y OS=Bacillus subtilis (strain 168) GN=rny PE=1 SV=1	944	58940	40.95	IEDELDYPGHIK
96	1::sw|O31774|RNY_BACSU	Ribonuclease Y OS=Bacillus subtilis (strain 168) GN=rny PE=1 SV=1	944	58940	28.74	IEDELDYPGHIK
96	1::sw|O31774|RNY_BACSU	Ribonuclease Y OS=Bacillus subtilis (strain 168) GN=rny PE=1 SV=1	944	58940	81.01	LEEISESYEGVEK
96	1::sw|O31774|RNY_BACSU	Ribonuclease Y OS=Bacillus subtilis (strain 168) GN=rny PE=1 SV=1	944	58940	66.5	LEEISESYEGVEK
96	1::sw|O31774|RNY_BACSU	Ribonuclease Y OS=Bacillus subtilis (strain 168) GN=rny PE=1 SV=1	944	58940	34.13	LEEISESYEGVEK
96	1::sw|O31774|RNY_BACSU	Ribonuclease Y OS=Bacillus subtilis (strain 168) GN=rny PE=1 SV=1	944	58940	53.55	VENELSHDIAIMTK
96	1::sw|O31774|RNY_BACSU	Ribonuclease Y OS=Bacillus subtilis (strain 168) GN=rny PE=1 SV=1	944	58940	19.39	VENELSHDIAIMTK
96	1::sw|O31774|RNY_BACSU	Ribonuclease Y OS=Bacillus subtilis (strain 168) GN=rny PE=1 SV=1	944	58940	53.46	IMVKPDSINDLEAHR
96	1::sw|O31774|RNY_BACSU	Ribonuclease Y OS=Bacillus subtilis (strain 168) GN=rny PE=1 SV=1	944	58940	30.72	IMVKPDSINDLEAHR	Oxidation (M)
96	1::sw|O31774|RNY_BACSU	Ribonuclease Y OS=Bacillus subtilis (strain 168) GN=rny PE=1 SV=1	944	58940	50.78	HSMEVAFLAGLMASELGEDAK
96	1::sw|O31774|RNY_BACSU	Ribonuclease Y OS=Bacillus subtilis (strain 168) GN=rny PE=1 SV=1	944	58940	32.26	HSMEVAFLAGLMASELGEDAK	Oxidation (M)
96	1::sw|O31774|RNY_BACSU	Ribonuclease Y OS=Bacillus subtilis (strain 168) GN=rny PE=1 SV=1	944	58940	37.16	EMGEQTTFEVGVHGLHPDLIK
403	1::sw|O31778|MIAB_BACSU	(Dimethylallyl)adenosine tRNA methylthiotransferase MiaB OS=Bacillus subtilis (strain 168) GN=miaB PE=1 SV=1	189	58532	26.1	FTTSHPR
403	1::sw|O31778|MIAB_BACSU	(Dimethylallyl)adenosine tRNA methylthiotransferase MiaB OS=Bacillus subtilis (strain 168) GN=miaB PE=1 SV=1	189	58532	19.19	EAIGKIVR
403	1::sw|O31778|MIAB_BACSU	(Dimethylallyl)adenosine tRNA methylthiotransferase MiaB OS=Bacillus subtilis (strain 168) GN=miaB PE=1 SV=1	189	58532	49.72	VFGELGHLK
403	1::sw|O31778|MIAB_BACSU	(Dimethylallyl)adenosine tRNA methylthiotransferase MiaB OS=Bacillus subtilis (strain 168) GN=miaB PE=1 SV=1	189	58532	33.09	EMVVEVWSK
403	1::sw|O31778|MIAB_BACSU	(Dimethylallyl)adenosine tRNA methylthiotransferase MiaB OS=Bacillus subtilis (strain 168) GN=miaB PE=1 SV=1	189	58532	18.17	EGDVIENLPK
403	1::sw|O31778|MIAB_BACSU	(Dimethylallyl)adenosine tRNA methylthiotransferase MiaB OS=Bacillus subtilis (strain 168) GN=miaB PE=1 SV=1	189	58532	43.04	LNALVNEISAK
403	1::sw|O31778|MIAB_BACSU	(Dimethylallyl)adenosine tRNA methylthiotransferase MiaB OS=Bacillus subtilis (strain 168) GN=miaB PE=1 SV=1	189	58532	26.91	VVEVLVEGESK
403	1::sw|O31778|MIAB_BACSU	(Dimethylallyl)adenosine tRNA methylthiotransferase MiaB OS=Bacillus subtilis (strain 168) GN=miaB PE=1 SV=1	189	58532	22.58	VVEVLVEGESK
403	1::sw|O31778|MIAB_BACSU	(Dimethylallyl)adenosine tRNA methylthiotransferase MiaB OS=Bacillus subtilis (strain 168) GN=miaB PE=1 SV=1	189	58532	48.63	VVEVLVEGESK
403	1::sw|O31778|MIAB_BACSU	(Dimethylallyl)adenosine tRNA methylthiotransferase MiaB OS=Bacillus subtilis (strain 168) GN=miaB PE=1 SV=1	189	58532	71.07	LPELLSEAYLSK
684	1::sw|O31782|PKSN_BACSU	Polyketide synthase PksN OS=Bacillus subtilis (strain 168) GN=pksN PE=1 SV=3	81	612061	20.74	KPGLTAEK
684	1::sw|O31782|PKSN_BACSU	Polyketide synthase PksN OS=Bacillus subtilis (strain 168) GN=pksN PE=1 SV=3	81	612061	27.4	DLHDVLAPK
684	1::sw|O31782|PKSN_BACSU	Polyketide synthase PksN OS=Bacillus subtilis (strain 168) GN=pksN PE=1 SV=3	81	612061	19.51	VLLHHYTK
684	1::sw|O31782|PKSN_BACSU	Polyketide synthase PksN OS=Bacillus subtilis (strain 168) GN=pksN PE=1 SV=3	81	612061	24.92	ISLPTYPFAK
684	1::sw|O31782|PKSN_BACSU	Polyketide synthase PksN OS=Bacillus subtilis (strain 168) GN=pksN PE=1 SV=3	81	612061	28.38	ISLPTYPFAK
684	1::sw|O31782|PKSN_BACSU	Polyketide synthase PksN OS=Bacillus subtilis (strain 168) GN=pksN PE=1 SV=3	81	612061	24.72	ISLPTYPFAK
684	1::sw|O31782|PKSN_BACSU	Polyketide synthase PksN OS=Bacillus subtilis (strain 168) GN=pksN PE=1 SV=3	81	612061	19.73	VVILGGDDNSR
684	1::sw|O31782|PKSN_BACSU	Polyketide synthase PksN OS=Bacillus subtilis (strain 168) GN=pksN PE=1 SV=3	81	612061	18.62	SFDMIIGILGILK
684	1::sw|O31782|PKSN_BACSU	Polyketide synthase PksN OS=Bacillus subtilis (strain 168) GN=pksN PE=1 SV=3	81	612061	57.66	AAVEQAAEVQGVPR
684	1::sw|O31782|PKSN_BACSU	Polyketide synthase PksN OS=Bacillus subtilis (strain 168) GN=pksN PE=1 SV=3	81	612061	21.87	LLENQMSSDSYVK
684	1::sw|O31782|PKSN_BACSU	Polyketide synthase PksN OS=Bacillus subtilis (strain 168) GN=pksN PE=1 SV=3	81	612061	18.27	NSDLAGTQNEDDHDDKK
483	1::sw|O31784|PKSR_BACSU	Polyketide synthase PksR OS=Bacillus subtilis (strain 168) GN=pksR PE=1 SV=2	149	286298	29.8	LNDPETGK
483	1::sw|O31784|PKSR_BACSU	Polyketide synthase PksR OS=Bacillus subtilis (strain 168) GN=pksR PE=1 SV=2	149	286298	41.94	KVNIENVK
483	1::sw|O31784|PKSR_BACSU	Polyketide synthase PksR OS=Bacillus subtilis (strain 168) GN=pksR PE=1 SV=2	149	286298	18.32	DLSDDAGKK
483	1::sw|O31784|PKSR_BACSU	Polyketide synthase PksR OS=Bacillus subtilis (strain 168) GN=pksR PE=1 SV=2	149	286298	40.81	LAVNMADPSK
483	1::sw|O31784|PKSR_BACSU	Polyketide synthase PksR OS=Bacillus subtilis (strain 168) GN=pksR PE=1 SV=2	149	286298	25.36	SIGTMSELWK	Oxidation (M)
483	1::sw|O31784|PKSR_BACSU	Polyketide synthase PksR OS=Bacillus subtilis (strain 168) GN=pksR PE=1 SV=2	149	286298	20.36	AMVTLVETALK
483	1::sw|O31784|PKSR_BACSU	Polyketide synthase PksR OS=Bacillus subtilis (strain 168) GN=pksR PE=1 SV=2	149	286298	64.43	AIAQQQLDYVNK
483	1::sw|O31784|PKSR_BACSU	Polyketide synthase PksR OS=Bacillus subtilis (strain 168) GN=pksR PE=1 SV=2	149	286298	29.33	YGIDSILQVNFIR
483	1::sw|O31784|PKSR_BACSU	Polyketide synthase PksR OS=Bacillus subtilis (strain 168) GN=pksR PE=1 SV=2	149	286298	26.1	GFIGFDSMGYLSEK
483	1::sw|O31784|PKSR_BACSU	Polyketide synthase PksR OS=Bacillus subtilis (strain 168) GN=pksR PE=1 SV=2	149	286298	36.94	EMVIETLLSENNLEK
928	1::sw|O31785|PKSS_BACSU	Polyketide biosynthesis cytochrome P450 PksS OS=Bacillus subtilis (strain 168) GN=pksS PE=3 SV=2	40	46870	28	SLVHQAFTPR
928	1::sw|O31785|PKSS_BACSU	Polyketide biosynthesis cytochrome P450 PksS OS=Bacillus subtilis (strain 168) GN=pksS PE=3 SV=2	40	46870	25.42	FGATYPAWLITR
928	1::sw|O31785|PKSS_BACSU	Polyketide biosynthesis cytochrome P450 PksS OS=Bacillus subtilis (strain 168) GN=pksS PE=3 SV=2	40	46870	22.87	MLNVSEDIDFVSDHMLAK
534	1::sw|O31793|YMAG_BACSU	Uncharacterized protein YmaG OS=Bacillus subtilis (strain 168) GN=ymaG PE=4 SV=2	130	10100	38.63	PGFGYGFGR
534	1::sw|O31793|YMAG_BACSU	Uncharacterized protein YmaG OS=Bacillus subtilis (strain 168) GN=ymaG PE=4 SV=2	130	10100	48.46	PGFGYGFGR
534	1::sw|O31793|YMAG_BACSU	Uncharacterized protein YmaG OS=Bacillus subtilis (strain 168) GN=ymaG PE=4 SV=2	130	10100	20.94	PFGFGYGFGR
534	1::sw|O31793|YMAG_BACSU	Uncharacterized protein YmaG OS=Bacillus subtilis (strain 168) GN=ymaG PE=4 SV=2	130	10100	43.17	PFGFGYGFGR
534	1::sw|O31793|YMAG_BACSU	Uncharacterized protein YmaG OS=Bacillus subtilis (strain 168) GN=ymaG PE=4 SV=2	130	10100	54.01	PFGFGYGFGR
941	1::sw|O31796|HFQ_BACSU	RNA-binding protein Hfq OS=Bacillus subtilis (strain 168) GN=hfq PE=1 SV=1	39	8509	38.89	GFDNFTVLLESEGK
1054	1::sw|O31797|YMZC_BACSU	Uncharacterized protein YmzC OS=Bacillus subtilis (strain 168) GN=ymzC PE=1 SV=1	26	10559	25.86	IYEYNESR
929	1::sw|O31812|YNDH_BACSU	Uncharacterized protein YndH OS=Bacillus subtilis (strain 168) GN=yndH PE=4 SV=1	40	24081	40.25	FFDALMIYDEK
663	1::sw|O31823|YNGC_BACSU	Uncharacterized membrane protein YngC OS=Bacillus subtilis (strain 168) GN=yngC PE=3 SV=1	86	21912	56.89	YGAGVVFSAR
663	1::sw|O31823|YNGC_BACSU	Uncharacterized membrane protein YngC OS=Bacillus subtilis (strain 168) GN=yngC PE=3 SV=1	86	21912	37.11	HAISIPAGIAR
663	1::sw|O31823|YNGC_BACSU	Uncharacterized membrane protein YngC OS=Bacillus subtilis (strain 168) GN=yngC PE=3 SV=1	86	21912	26.92	HAISIPAGIAR
986	1::sw|O31827|PPSE_BACSU	Plipastatin synthase subunit E OS=Bacillus subtilis (strain 168) GN=ppsE PE=1 SV=1	34	145155	19.59	KTDTDFR
986	1::sw|O31827|PPSE_BACSU	Plipastatin synthase subunit E OS=Bacillus subtilis (strain 168) GN=ppsE PE=1 SV=1	34	145155	33.56	NADIILDILEK
997	1::sw|O31829|YOAF_BACSU	Uncharacterized protein YoaF OS=Bacillus subtilis (strain 168) GN=yoaF PE=4 SV=1	33	11097	32.6	DWTFTLVEK
169	1::sw|O31847|YOZO_BACSU	Uncharacterized protein YozO OS=Bacillus subtilis (strain 168) GN=yozO PE=4 SV=1	569	13244	34.46	IIFFDNK
169	1::sw|O31847|YOZO_BACSU	Uncharacterized protein YozO OS=Bacillus subtilis (strain 168) GN=yozO PE=4 SV=1	569	13244	29.73	TFELEFAK
169	1::sw|O31847|YOZO_BACSU	Uncharacterized protein YozO OS=Bacillus subtilis (strain 168) GN=yozO PE=4 SV=1	569	13244	70.84	VDQICFTNK
169	1::sw|O31847|YOZO_BACSU	Uncharacterized protein YozO OS=Bacillus subtilis (strain 168) GN=yozO PE=4 SV=1	569	13244	77.55	VDQICFTNK
169	1::sw|O31847|YOZO_BACSU	Uncharacterized protein YozO OS=Bacillus subtilis (strain 168) GN=yozO PE=4 SV=1	569	13244	28.85	VDQICFTNK
169	1::sw|O31847|YOZO_BACSU	Uncharacterized protein YozO OS=Bacillus subtilis (strain 168) GN=yozO PE=4 SV=1	569	13244	79.71	KLEALLVEGER
169	1::sw|O31847|YOZO_BACSU	Uncharacterized protein YozO OS=Bacillus subtilis (strain 168) GN=yozO PE=4 SV=1	569	13244	75.45	KLEALLVEGER
169	1::sw|O31847|YOZO_BACSU	Uncharacterized protein YozO OS=Bacillus subtilis (strain 168) GN=yozO PE=4 SV=1	569	13244	29.08	KLEALLVEGER
169	1::sw|O31847|YOZO_BACSU	Uncharacterized protein YozO OS=Bacillus subtilis (strain 168) GN=yozO PE=4 SV=1	569	13244	36.56	KLEALLVEGER
169	1::sw|O31847|YOZO_BACSU	Uncharacterized protein YozO OS=Bacillus subtilis (strain 168) GN=yozO PE=4 SV=1	569	13244	36.89	KLEALLVEGER
169	1::sw|O31847|YOZO_BACSU	Uncharacterized protein YozO OS=Bacillus subtilis (strain 168) GN=yozO PE=4 SV=1	569	13244	101.3	DTDLSEVQAVLTK
169	1::sw|O31847|YOZO_BACSU	Uncharacterized protein YozO OS=Bacillus subtilis (strain 168) GN=yozO PE=4 SV=1	569	13244	118.14	DTDLSEVQAVLTK
169	1::sw|O31847|YOZO_BACSU	Uncharacterized protein YozO OS=Bacillus subtilis (strain 168) GN=yozO PE=4 SV=1	569	13244	102.59	DTDLSEVQAVLTK
1074	1::sw|O31850|YOJN_BACSU	Uncharacterized protein YojN OS=Bacillus subtilis (strain 168) GN=yojN PE=3 SV=1	24	33573	24.21	FVIIDVPYIK
547	1::sw|O31875|NRDEB_BACSU	Ribonucleoside-diphosphate reductase NrdEB subunit alpha OS=Bacillus subtilis (strain 168) GN=nrdEB PE=3 SV=2	126	124998	40.29	LLDNAFR
547	1::sw|O31875|NRDEB_BACSU	Ribonucleoside-diphosphate reductase NrdEB subunit alpha OS=Bacillus subtilis (strain 168) GN=nrdEB PE=3 SV=2	126	124998	23.11	KDAEIFK
547	1::sw|O31875|NRDEB_BACSU	Ribonucleoside-diphosphate reductase NrdEB subunit alpha OS=Bacillus subtilis (strain 168) GN=nrdEB PE=3 SV=2	126	124998	39.62	ISADEDVR
547	1::sw|O31875|NRDEB_BACSU	Ribonucleoside-diphosphate reductase NrdEB subunit alpha OS=Bacillus subtilis (strain 168) GN=nrdEB PE=3 SV=2	126	124998	49.3	YADQMGQR
547	1::sw|O31875|NRDEB_BACSU	Ribonucleoside-diphosphate reductase NrdEB subunit alpha OS=Bacillus subtilis (strain 168) GN=nrdEB PE=3 SV=2	126	124998	28.8	KISADEDVR
547	1::sw|O31875|NRDEB_BACSU	Ribonucleoside-diphosphate reductase NrdEB subunit alpha OS=Bacillus subtilis (strain 168) GN=nrdEB PE=3 SV=2	126	124998	25.49	FYNDYALK
547	1::sw|O31875|NRDEB_BACSU	Ribonucleoside-diphosphate reductase NrdEB subunit alpha OS=Bacillus subtilis (strain 168) GN=nrdEB PE=3 SV=2	126	124998	22.3	FPSFMSAFK
547	1::sw|O31875|NRDEB_BACSU	Ribonucleoside-diphosphate reductase NrdEB subunit alpha OS=Bacillus subtilis (strain 168) GN=nrdEB PE=3 SV=2	126	124998	26.58	FPSFMSAFK
547	1::sw|O31875|NRDEB_BACSU	Ribonucleoside-diphosphate reductase NrdEB subunit alpha OS=Bacillus subtilis (strain 168) GN=nrdEB PE=3 SV=2	126	124998	29.85	LLEQLAILR
1111	1::sw|O31878|YOSK_BACSU	SPBc2 prophage-derived uncharacterized protein YosK OS=Bacillus subtilis (strain 168) GN=yosK PE=4 SV=1	19	8143	19.26	PSVPR
436	1::sw|O31929|YOPI_BACSU	SPBc2 prophage-derived uncharacterized protein YopI OS=Bacillus subtilis (strain 168) GN=yopI PE=4 SV=1	167	20596	62.69	LFNINLPSK
436	1::sw|O31929|YOPI_BACSU	SPBc2 prophage-derived uncharacterized protein YopI OS=Bacillus subtilis (strain 168) GN=yopI PE=4 SV=1	167	20596	36.23	DKLFNINLPSK
436	1::sw|O31929|YOPI_BACSU	SPBc2 prophage-derived uncharacterized protein YopI OS=Bacillus subtilis (strain 168) GN=yopI PE=4 SV=1	167	20596	74.17	NTNLIVSVTPDDK
436	1::sw|O31929|YOPI_BACSU	SPBc2 prophage-derived uncharacterized protein YopI OS=Bacillus subtilis (strain 168) GN=yopI PE=4 SV=1	167	20596	61.6	ATTEEFAEFGYYR
1001	1::sw|O31930|YOPH_BACSU	SPBc2 prophage-derived uncharacterized protein YopH OS=Bacillus subtilis (strain 168) GN=yopH PE=4 SV=1	32	20465	20.69	SPSWVGDIIK
1001	1::sw|O31930|YOPH_BACSU	SPBc2 prophage-derived uncharacterized protein YopH OS=Bacillus subtilis (strain 168) GN=yopH PE=4 SV=1	32	20465	23.02	HLLHESIDHIL
1001	1::sw|O31930|YOPH_BACSU	SPBc2 prophage-derived uncharacterized protein YopH OS=Bacillus subtilis (strain 168) GN=yopH PE=4 SV=1	32	20465	24.97	SVELSITDGTAQELEHLK
211	1::sw|O31942|YONS_BACSU	SPBc2 prophage-derived uncharacterized lipoprotein YonS OS=Bacillus subtilis (strain 168) GN=yonS PE=4 SV=1	441	22296	39.13	LLDEYVGK
211	1::sw|O31942|YONS_BACSU	SPBc2 prophage-derived uncharacterized lipoprotein YonS OS=Bacillus subtilis (strain 168) GN=yonS PE=4 SV=1	441	22296	34	LLDEYVGK
211	1::sw|O31942|YONS_BACSU	SPBc2 prophage-derived uncharacterized lipoprotein YonS OS=Bacillus subtilis (strain 168) GN=yonS PE=4 SV=1	441	22296	23.96	LLDEYVGK
211	1::sw|O31942|YONS_BACSU	SPBc2 prophage-derived uncharacterized lipoprotein YonS OS=Bacillus subtilis (strain 168) GN=yonS PE=4 SV=1	441	22296	18.87	LLDEYVGK
211	1::sw|O31942|YONS_BACSU	SPBc2 prophage-derived uncharacterized lipoprotein YonS OS=Bacillus subtilis (strain 168) GN=yonS PE=4 SV=1	441	22296	34.32	LLDEYVGK
211	1::sw|O31942|YONS_BACSU	SPBc2 prophage-derived uncharacterized lipoprotein YonS OS=Bacillus subtilis (strain 168) GN=yonS PE=4 SV=1	441	22296	46.59	TGPIQFTVK
211	1::sw|O31942|YONS_BACSU	SPBc2 prophage-derived uncharacterized lipoprotein YonS OS=Bacillus subtilis (strain 168) GN=yonS PE=4 SV=1	441	22296	34.06	ISSPFNEDLK
211	1::sw|O31942|YONS_BACSU	SPBc2 prophage-derived uncharacterized lipoprotein YonS OS=Bacillus subtilis (strain 168) GN=yonS PE=4 SV=1	441	22296	32.18	ISSPFNEDLK
211	1::sw|O31942|YONS_BACSU	SPBc2 prophage-derived uncharacterized lipoprotein YonS OS=Bacillus subtilis (strain 168) GN=yonS PE=4 SV=1	441	22296	25.44	ISSPFNEDLK
211	1::sw|O31942|YONS_BACSU	SPBc2 prophage-derived uncharacterized lipoprotein YonS OS=Bacillus subtilis (strain 168) GN=yonS PE=4 SV=1	441	22296	31.68	VGDVYEIDGGTAK
211	1::sw|O31942|YONS_BACSU	SPBc2 prophage-derived uncharacterized lipoprotein YonS OS=Bacillus subtilis (strain 168) GN=yonS PE=4 SV=1	441	22296	38.23	VGDVYEIDGGTAK
211	1::sw|O31942|YONS_BACSU	SPBc2 prophage-derived uncharacterized lipoprotein YonS OS=Bacillus subtilis (strain 168) GN=yonS PE=4 SV=1	441	22296	67.29	VGDVYEIDGGTAK
211	1::sw|O31942|YONS_BACSU	SPBc2 prophage-derived uncharacterized lipoprotein YonS OS=Bacillus subtilis (strain 168) GN=yonS PE=4 SV=1	441	22296	61.02	VGDVYEIDGGTAK
211	1::sw|O31942|YONS_BACSU	SPBc2 prophage-derived uncharacterized lipoprotein YonS OS=Bacillus subtilis (strain 168) GN=yonS PE=4 SV=1	441	22296	69.77	VGDVYEIDGGTAK
211	1::sw|O31942|YONS_BACSU	SPBc2 prophage-derived uncharacterized lipoprotein YonS OS=Bacillus subtilis (strain 168) GN=yonS PE=4 SV=1	441	22296	73.71	VGDVYEIDGGTAK
211	1::sw|O31942|YONS_BACSU	SPBc2 prophage-derived uncharacterized lipoprotein YonS OS=Bacillus subtilis (strain 168) GN=yonS PE=4 SV=1	441	22296	68.29	VGDVYEIDGGTAK
211	1::sw|O31942|YONS_BACSU	SPBc2 prophage-derived uncharacterized lipoprotein YonS OS=Bacillus subtilis (strain 168) GN=yonS PE=4 SV=1	441	22296	90.69	VNDSGSIIYVFDNEEDIKDLESIR
339	1::sw|O31974|YOMK_BACSU	SPBc2 prophage-derived uncharacterized protein YomK OS=Bacillus subtilis (strain 168) GN=yomK PE=4 SV=1	252	16889	22.35	SQYDPSK
339	1::sw|O31974|YOMK_BACSU	SPBc2 prophage-derived uncharacterized protein YomK OS=Bacillus subtilis (strain 168) GN=yomK PE=4 SV=1	252	16889	47.87	ELLIQIK
339	1::sw|O31974|YOMK_BACSU	SPBc2 prophage-derived uncharacterized protein YomK OS=Bacillus subtilis (strain 168) GN=yomK PE=4 SV=1	252	16889	19.66	ELIKFIK
339	1::sw|O31974|YOMK_BACSU	SPBc2 prophage-derived uncharacterized protein YomK OS=Bacillus subtilis (strain 168) GN=yomK PE=4 SV=1	252	16889	48.12	HNLAEMNPK
339	1::sw|O31974|YOMK_BACSU	SPBc2 prophage-derived uncharacterized protein YomK OS=Bacillus subtilis (strain 168) GN=yomK PE=4 SV=1	252	16889	21.99	HNLAEMNPK
339	1::sw|O31974|YOMK_BACSU	SPBc2 prophage-derived uncharacterized protein YomK OS=Bacillus subtilis (strain 168) GN=yomK PE=4 SV=1	252	16889	22.64	HNLAEMNPK	Oxidation (M)
339	1::sw|O31974|YOMK_BACSU	SPBc2 prophage-derived uncharacterized protein YomK OS=Bacillus subtilis (strain 168) GN=yomK PE=4 SV=1	252	16889	30.67	ENATTADYLK
339	1::sw|O31974|YOMK_BACSU	SPBc2 prophage-derived uncharacterized protein YomK OS=Bacillus subtilis (strain 168) GN=yomK PE=4 SV=1	252	16889	37.84	ENATTADYLK
339	1::sw|O31974|YOMK_BACSU	SPBc2 prophage-derived uncharacterized protein YomK OS=Bacillus subtilis (strain 168) GN=yomK PE=4 SV=1	252	16889	61.47	SLSPSELSSAIAR
339	1::sw|O31974|YOMK_BACSU	SPBc2 prophage-derived uncharacterized protein YomK OS=Bacillus subtilis (strain 168) GN=yomK PE=4 SV=1	252	16889	87.09	SLSPSELSSAIAR
339	1::sw|O31974|YOMK_BACSU	SPBc2 prophage-derived uncharacterized protein YomK OS=Bacillus subtilis (strain 168) GN=yomK PE=4 SV=1	252	16889	58.57	DKENATTADYLK
787	1::sw|O31975|YOMJ_BACSU	SPBc2 prophage-derived uncharacterized membrane protein YomJ OS=Bacillus subtilis (strain 168) GN=yomJ PE=4 SV=1	61	25333	47.53	LKENAETLK
787	1::sw|O31975|YOMJ_BACSU	SPBc2 prophage-derived uncharacterized membrane protein YomJ OS=Bacillus subtilis (strain 168) GN=yomJ PE=4 SV=1	61	25333	36.25	HFDGGFNPDNFFNTYK
93	1::sw|O31989|YOLF_BACSU	SPBc2 prophage-derived uncharacterized protein YolF OS=Bacillus subtilis (strain 168) GN=yolF PE=4 SV=1	952	12304	25.81	IVIETTNK
93	1::sw|O31989|YOLF_BACSU	SPBc2 prophage-derived uncharacterized protein YolF OS=Bacillus subtilis (strain 168) GN=yolF PE=4 SV=1	952	12304	40.56	IVIETTNK
93	1::sw|O31989|YOLF_BACSU	SPBc2 prophage-derived uncharacterized protein YolF OS=Bacillus subtilis (strain 168) GN=yolF PE=4 SV=1	952	12304	25.39	IVIETTNKR
93	1::sw|O31989|YOLF_BACSU	SPBc2 prophage-derived uncharacterized protein YolF OS=Bacillus subtilis (strain 168) GN=yolF PE=4 SV=1	952	12304	35.74	IVIETTNKR
93	1::sw|O31989|YOLF_BACSU	SPBc2 prophage-derived uncharacterized protein YolF OS=Bacillus subtilis (strain 168) GN=yolF PE=4 SV=1	952	12304	55.93	IVIETTNKR
93	1::sw|O31989|YOLF_BACSU	SPBc2 prophage-derived uncharacterized protein YolF OS=Bacillus subtilis (strain 168) GN=yolF PE=4 SV=1	952	12304	27.28	IGMPYAQPDR
93	1::sw|O31989|YOLF_BACSU	SPBc2 prophage-derived uncharacterized protein YolF OS=Bacillus subtilis (strain 168) GN=yolF PE=4 SV=1	952	12304	62.15	IGMPYAQPDR
93	1::sw|O31989|YOLF_BACSU	SPBc2 prophage-derived uncharacterized protein YolF OS=Bacillus subtilis (strain 168) GN=yolF PE=4 SV=1	952	12304	59.47	IGMPYAQPDR
93	1::sw|O31989|YOLF_BACSU	SPBc2 prophage-derived uncharacterized protein YolF OS=Bacillus subtilis (strain 168) GN=yolF PE=4 SV=1	952	12304	61.49	IGMPYAQPDR
93	1::sw|O31989|YOLF_BACSU	SPBc2 prophage-derived uncharacterized protein YolF OS=Bacillus subtilis (strain 168) GN=yolF PE=4 SV=1	952	12304	56.16	IGMPYAQPDR
93	1::sw|O31989|YOLF_BACSU	SPBc2 prophage-derived uncharacterized protein YolF OS=Bacillus subtilis (strain 168) GN=yolF PE=4 SV=1	952	12304	61.97	IGMPYAQPDR
93	1::sw|O31989|YOLF_BACSU	SPBc2 prophage-derived uncharacterized protein YolF OS=Bacillus subtilis (strain 168) GN=yolF PE=4 SV=1	952	12304	60.27	IGMPYAQPDR
93	1::sw|O31989|YOLF_BACSU	SPBc2 prophage-derived uncharacterized protein YolF OS=Bacillus subtilis (strain 168) GN=yolF PE=4 SV=1	952	12304	38.77	IGMPYAQPDR
93	1::sw|O31989|YOLF_BACSU	SPBc2 prophage-derived uncharacterized protein YolF OS=Bacillus subtilis (strain 168) GN=yolF PE=4 SV=1	952	12304	41.36	IGMPYAQPDR
93	1::sw|O31989|YOLF_BACSU	SPBc2 prophage-derived uncharacterized protein YolF OS=Bacillus subtilis (strain 168) GN=yolF PE=4 SV=1	952	12304	64.15	YGVADNIDYK
93	1::sw|O31989|YOLF_BACSU	SPBc2 prophage-derived uncharacterized protein YolF OS=Bacillus subtilis (strain 168) GN=yolF PE=4 SV=1	952	12304	69.9	YGVADNIDYK
93	1::sw|O31989|YOLF_BACSU	SPBc2 prophage-derived uncharacterized protein YolF OS=Bacillus subtilis (strain 168) GN=yolF PE=4 SV=1	952	12304	62.86	YGVADNIDYK
93	1::sw|O31989|YOLF_BACSU	SPBc2 prophage-derived uncharacterized protein YolF OS=Bacillus subtilis (strain 168) GN=yolF PE=4 SV=1	952	12304	28.77	YGVADNIDYK
93	1::sw|O31989|YOLF_BACSU	SPBc2 prophage-derived uncharacterized protein YolF OS=Bacillus subtilis (strain 168) GN=yolF PE=4 SV=1	952	12304	70.34	YGVADNIDYK
93	1::sw|O31989|YOLF_BACSU	SPBc2 prophage-derived uncharacterized protein YolF OS=Bacillus subtilis (strain 168) GN=yolF PE=4 SV=1	952	12304	51.07	YGVADNIDYK
93	1::sw|O31989|YOLF_BACSU	SPBc2 prophage-derived uncharacterized protein YolF OS=Bacillus subtilis (strain 168) GN=yolF PE=4 SV=1	952	12304	23.66	YGVADNIDYK
93	1::sw|O31989|YOLF_BACSU	SPBc2 prophage-derived uncharacterized protein YolF OS=Bacillus subtilis (strain 168) GN=yolF PE=4 SV=1	952	12304	43.53	IGMPYAQPDR	Oxidation (M)
93	1::sw|O31989|YOLF_BACSU	SPBc2 prophage-derived uncharacterized protein YolF OS=Bacillus subtilis (strain 168) GN=yolF PE=4 SV=1	952	12304	21.76	IGMPYAQPDR	Oxidation (M)
93	1::sw|O31989|YOLF_BACSU	SPBc2 prophage-derived uncharacterized protein YolF OS=Bacillus subtilis (strain 168) GN=yolF PE=4 SV=1	952	12304	34.92	IGMPYAQPDR	Oxidation (M)
93	1::sw|O31989|YOLF_BACSU	SPBc2 prophage-derived uncharacterized protein YolF OS=Bacillus subtilis (strain 168) GN=yolF PE=4 SV=1	952	12304	63.46	TEIPINQIVSIK
93	1::sw|O31989|YOLF_BACSU	SPBc2 prophage-derived uncharacterized protein YolF OS=Bacillus subtilis (strain 168) GN=yolF PE=4 SV=1	952	12304	23.31	TEIPINQIVSIK
93	1::sw|O31989|YOLF_BACSU	SPBc2 prophage-derived uncharacterized protein YolF OS=Bacillus subtilis (strain 168) GN=yolF PE=4 SV=1	952	12304	40.49	TEIPINQIVSIK
93	1::sw|O31989|YOLF_BACSU	SPBc2 prophage-derived uncharacterized protein YolF OS=Bacillus subtilis (strain 168) GN=yolF PE=4 SV=1	952	12304	45.88	ESDKYGVADNIDYK
93	1::sw|O31989|YOLF_BACSU	SPBc2 prophage-derived uncharacterized protein YolF OS=Bacillus subtilis (strain 168) GN=yolF PE=4 SV=1	952	12304	42.34	ESDKYGVADNIDYK
93	1::sw|O31989|YOLF_BACSU	SPBc2 prophage-derived uncharacterized protein YolF OS=Bacillus subtilis (strain 168) GN=yolF PE=4 SV=1	952	12304	42.26	ESDKYGVADNIDYK
93	1::sw|O31989|YOLF_BACSU	SPBc2 prophage-derived uncharacterized protein YolF OS=Bacillus subtilis (strain 168) GN=yolF PE=4 SV=1	952	12304	22.56	ESDKYGVADNIDYK
93	1::sw|O31989|YOLF_BACSU	SPBc2 prophage-derived uncharacterized protein YolF OS=Bacillus subtilis (strain 168) GN=yolF PE=4 SV=1	952	12304	21.89	ESDKYGVADNIDYK
93	1::sw|O31989|YOLF_BACSU	SPBc2 prophage-derived uncharacterized protein YolF OS=Bacillus subtilis (strain 168) GN=yolF PE=4 SV=1	952	12304	74.73	FLVFLNGAQQFIQK
93	1::sw|O31989|YOLF_BACSU	SPBc2 prophage-derived uncharacterized protein YolF OS=Bacillus subtilis (strain 168) GN=yolF PE=4 SV=1	952	12304	92.46	FLVFLNGAQQFIQK
93	1::sw|O31989|YOLF_BACSU	SPBc2 prophage-derived uncharacterized protein YolF OS=Bacillus subtilis (strain 168) GN=yolF PE=4 SV=1	952	12304	31	FLVFLNGAQQFIQK
93	1::sw|O31989|YOLF_BACSU	SPBc2 prophage-derived uncharacterized protein YolF OS=Bacillus subtilis (strain 168) GN=yolF PE=4 SV=1	952	12304	23.1	FGLSKTEIPINQIVSIK
430	1::sw|O32000|YOKG_BACSU	SPBc2 prophage-derived pesticidal crystal protein-like YokG OS=Bacillus subtilis (strain 168) GN=yokG PE=3 SV=1	172	40888	30.06	LCDWWLEK
430	1::sw|O32000|YOKG_BACSU	SPBc2 prophage-derived pesticidal crystal protein-like YokG OS=Bacillus subtilis (strain 168) GN=yokG PE=3 SV=1	172	40888	46.92	AITTASNDQDR
430	1::sw|O32000|YOKG_BACSU	SPBc2 prophage-derived pesticidal crystal protein-like YokG OS=Bacillus subtilis (strain 168) GN=yokG PE=3 SV=1	172	40888	58.68	AITTASNDQDR
430	1::sw|O32000|YOKG_BACSU	SPBc2 prophage-derived pesticidal crystal protein-like YokG OS=Bacillus subtilis (strain 168) GN=yokG PE=3 SV=1	172	40888	19.81	DGLISTGYWAK
430	1::sw|O32000|YOKG_BACSU	SPBc2 prophage-derived pesticidal crystal protein-like YokG OS=Bacillus subtilis (strain 168) GN=yokG PE=3 SV=1	172	40888	30.27	NVEIPQDFQK
430	1::sw|O32000|YOKG_BACSU	SPBc2 prophage-derived pesticidal crystal protein-like YokG OS=Bacillus subtilis (strain 168) GN=yokG PE=3 SV=1	172	40888	35.63	ELDENQQSMK
430	1::sw|O32000|YOKG_BACSU	SPBc2 prophage-derived pesticidal crystal protein-like YokG OS=Bacillus subtilis (strain 168) GN=yokG PE=3 SV=1	172	40888	58.6	LLGESLEEHEINEK
430	1::sw|O32000|YOKG_BACSU	SPBc2 prophage-derived pesticidal crystal protein-like YokG OS=Bacillus subtilis (strain 168) GN=yokG PE=3 SV=1	172	40888	32.73	QDAIQDFHEVCLILMR
430	1::sw|O32000|YOKG_BACSU	SPBc2 prophage-derived pesticidal crystal protein-like YokG OS=Bacillus subtilis (strain 168) GN=yokG PE=3 SV=1	172	40888	23.83	VLSLFHGINIDLHNVIYQAER
448	1::sw|O32001|YOKF_BACSU	SPBc2 prophage-derived endonuclease YokF OS=Bacillus subtilis (strain 168) GN=yokF PE=1 SV=1	162	33268	33.92	ELVDVTLDR
448	1::sw|O32001|YOKF_BACSU	SPBc2 prophage-derived endonuclease YokF OS=Bacillus subtilis (strain 168) GN=yokF PE=1 SV=1	162	33268	43.74	LLAYVYVDGK
448	1::sw|O32001|YOKF_BACSU	SPBc2 prophage-derived endonuclease YokF OS=Bacillus subtilis (strain 168) GN=yokF PE=1 SV=1	162	33268	32.67	LLAYVYVDGK
448	1::sw|O32001|YOKF_BACSU	SPBc2 prophage-derived endonuclease YokF OS=Bacillus subtilis (strain 168) GN=yokF PE=1 SV=1	162	33268	46.75	LLAYVYVDGK
448	1::sw|O32001|YOKF_BACSU	SPBc2 prophage-derived endonuclease YokF OS=Bacillus subtilis (strain 168) GN=yokF PE=1 SV=1	162	33268	30.12	VAYVYEPNTK
448	1::sw|O32001|YOKF_BACSU	SPBc2 prophage-derived endonuclease YokF OS=Bacillus subtilis (strain 168) GN=yokF PE=1 SV=1	162	33268	20.51	ETPQASTDVEK
448	1::sw|O32001|YOKF_BACSU	SPBc2 prophage-derived endonuclease YokF OS=Bacillus subtilis (strain 168) GN=yokF PE=1 SV=1	162	33268	67.71	EASSETTGGTETFK
459	1::sw|O32002|YOKE_BACSU	SPBc2 prophage-derived uncharacterized protein YokE OS=Bacillus subtilis (strain 168) GN=yokE PE=4 SV=1	157	18240	37.86	YGIIDYPILLK
459	1::sw|O32002|YOKE_BACSU	SPBc2 prophage-derived uncharacterized protein YokE OS=Bacillus subtilis (strain 168) GN=yokE PE=4 SV=1	157	18240	39.27	YGIIDYPILLK
459	1::sw|O32002|YOKE_BACSU	SPBc2 prophage-derived uncharacterized protein YokE OS=Bacillus subtilis (strain 168) GN=yokE PE=4 SV=1	157	18240	42.97	YGIIDYPILLK
459	1::sw|O32002|YOKE_BACSU	SPBc2 prophage-derived uncharacterized protein YokE OS=Bacillus subtilis (strain 168) GN=yokE PE=4 SV=1	157	18240	53.93	DLESIIQEFPK
459	1::sw|O32002|YOKE_BACSU	SPBc2 prophage-derived uncharacterized protein YokE OS=Bacillus subtilis (strain 168) GN=yokE PE=4 SV=1	157	18240	69.04	DLESIIQEFPK
614	1::sw|O32003|YOKD_BACSU	SPBc2 prophage-derived aminoglycoside N(3~)-acetyltransferase-like protein YokD OS=Bacillus subtilis (strain 168) GN=yokD PE=1 SV=1	100	31009	39.36	GMGQIVELFR
614	1::sw|O32003|YOKD_BACSU	SPBc2 prophage-derived aminoglycoside N(3~)-acetyltransferase-like protein YokD OS=Bacillus subtilis (strain 168) GN=yokD PE=1 SV=1	100	31009	81.17	LFSLTEAVDFAEK
652	1::sw|O32005|YOKB_BACSU	SPBc2 prophage-derived uncharacterized lipoprotein YokB OS=Bacillus subtilis (strain 168) GN=yokB PE=4 SV=1	88	27548	48.89	NMEIPEVK
652	1::sw|O32005|YOKB_BACSU	SPBc2 prophage-derived uncharacterized lipoprotein YokB OS=Bacillus subtilis (strain 168) GN=yokB PE=4 SV=1	88	27548	19.35	ELDASETDK
652	1::sw|O32005|YOKB_BACSU	SPBc2 prophage-derived uncharacterized lipoprotein YokB OS=Bacillus subtilis (strain 168) GN=yokB PE=4 SV=1	88	27548	58.9	YNLIDAYFPGSTGR
567	1::sw|O32022|YQZD_BACSU	Uncharacterized protein YqzD OS=Bacillus subtilis (strain 168) GN=yqzD PE=4 SV=1	117	13315	72.39	AEHVSVEDVNTIIK
567	1::sw|O32022|YQZD_BACSU	Uncharacterized protein YqzD OS=Bacillus subtilis (strain 168) GN=yqzD PE=4 SV=1	117	13315	33.61	MTVLEEELLETNLVIR
567	1::sw|O32022|YQZD_BACSU	Uncharacterized protein YqzD OS=Bacillus subtilis (strain 168) GN=yqzD PE=4 SV=1	117	13315	51.55	AEHVSVEDVNTIIKDNEK
364	1::sw|O32023|YQZC_BACSU	Uncharacterized protein YqzC OS=Bacillus subtilis (strain 168) GN=yqzC PE=4 SV=2	221	17017	27.54	LVSVNRDEYQK
364	1::sw|O32023|YQZC_BACSU	Uncharacterized protein YqzC OS=Bacillus subtilis (strain 168) GN=yqzC PE=4 SV=2	221	17017	84.73	DGMSTADVSAILEK
364	1::sw|O32023|YQZC_BACSU	Uncharacterized protein YqzC OS=Bacillus subtilis (strain 168) GN=yqzC PE=4 SV=2	221	17017	75.48	DGMSTADVSAILEK	Oxidation (M)
364	1::sw|O32023|YQZC_BACSU	Uncharacterized protein YqzC OS=Bacillus subtilis (strain 168) GN=yqzC PE=4 SV=2	221	17017	75.97	TVTEQDVNNYLDSK
364	1::sw|O32023|YQZC_BACSU	Uncharacterized protein YqzC OS=Bacillus subtilis (strain 168) GN=yqzC PE=4 SV=2	221	17017	41.1	EGIISSAQDFNDYVIDAGYHK
190	1::sw|O32031|YRRS_BACSU	Uncharacterized membrane protein YrrS OS=Bacillus subtilis (strain 168) GN=yrrS PE=4 SV=1	497	25318	28.32	SDEDIKDSK
190	1::sw|O32031|YRRS_BACSU	Uncharacterized membrane protein YrrS OS=Bacillus subtilis (strain 168) GN=yrrS PE=4 SV=1	497	25318	42.13	TYENPDWK
190	1::sw|O32031|YRRS_BACSU	Uncharacterized membrane protein YrrS OS=Bacillus subtilis (strain 168) GN=yrrS PE=4 SV=1	497	25318	31.31	TYENPDWK
190	1::sw|O32031|YRRS_BACSU	Uncharacterized membrane protein YrrS OS=Bacillus subtilis (strain 168) GN=yrrS PE=4 SV=1	497	25318	37.14	TYENPDWK
190	1::sw|O32031|YRRS_BACSU	Uncharacterized membrane protein YrrS OS=Bacillus subtilis (strain 168) GN=yrrS PE=4 SV=1	497	25318	38.05	VTEGGSSSDVEK
190	1::sw|O32031|YRRS_BACSU	Uncharacterized membrane protein YrrS OS=Bacillus subtilis (strain 168) GN=yrrS PE=4 SV=1	497	25318	70.98	VTEGGSSSDVEK
190	1::sw|O32031|YRRS_BACSU	Uncharacterized membrane protein YrrS OS=Bacillus subtilis (strain 168) GN=yrrS PE=4 SV=1	497	25318	82.16	VTEGGSSSDVEK
190	1::sw|O32031|YRRS_BACSU	Uncharacterized membrane protein YrrS OS=Bacillus subtilis (strain 168) GN=yrrS PE=4 SV=1	497	25318	67.86	VTEGGSSSDVEK
190	1::sw|O32031|YRRS_BACSU	Uncharacterized membrane protein YrrS OS=Bacillus subtilis (strain 168) GN=yrrS PE=4 SV=1	497	25318	69.72	VTEGGSSSDVEK
190	1::sw|O32031|YRRS_BACSU	Uncharacterized membrane protein YrrS OS=Bacillus subtilis (strain 168) GN=yrrS PE=4 SV=1	497	25318	42.42	VTEGGSSSDVEK
190	1::sw|O32031|YRRS_BACSU	Uncharacterized membrane protein YrrS OS=Bacillus subtilis (strain 168) GN=yrrS PE=4 SV=1	497	25318	33.28	VTEGGSSSDVEK
190	1::sw|O32031|YRRS_BACSU	Uncharacterized membrane protein YrrS OS=Bacillus subtilis (strain 168) GN=yrrS PE=4 SV=1	497	25318	29.6	DVSKDSETAQK
190	1::sw|O32031|YRRS_BACSU	Uncharacterized membrane protein YrrS OS=Bacillus subtilis (strain 168) GN=yrrS PE=4 SV=1	497	25318	37.08	DVSKDSETAQK
190	1::sw|O32031|YRRS_BACSU	Uncharacterized membrane protein YrrS OS=Bacillus subtilis (strain 168) GN=yrrS PE=4 SV=1	497	25318	39.07	DVSKDSETAQK
190	1::sw|O32031|YRRS_BACSU	Uncharacterized membrane protein YrrS OS=Bacillus subtilis (strain 168) GN=yrrS PE=4 SV=1	497	25318	67.77	YQVTITWVDEK
190	1::sw|O32031|YRRS_BACSU	Uncharacterized membrane protein YrrS OS=Bacillus subtilis (strain 168) GN=yrrS PE=4 SV=1	497	25318	35.67	YQVTITWVDEK
190	1::sw|O32031|YRRS_BACSU	Uncharacterized membrane protein YrrS OS=Bacillus subtilis (strain 168) GN=yrrS PE=4 SV=1	497	25318	53.72	KDDSDSDSSSDSAGDGLK
859	1::sw|O32033|URK_BACSU	Uridine kinase OS=Bacillus subtilis (strain 168) GN=udk PE=3 SV=1	49	24472	46.35	SEETVHVEPK
859	1::sw|O32033|URK_BACSU	Uridine kinase OS=Bacillus subtilis (strain 168) GN=udk PE=3 SV=1	49	24472	20.31	IQTILEQNAIL
907	1::sw|O32034|YRRO_BACSU	Uncharacterized protease YrrO OS=Bacillus subtilis (strain 168) GN=yrrO PE=3 SV=1	44	48055	43.55	KPELLAPAGNLEK
122	1::sw|O32038|SYD_BACSU	Aspartate--tRNA ligase OS=Bacillus subtilis (strain 168) GN=aspS PE=3 SV=1	787	66105	40.38	YYQIAR
122	1::sw|O32038|SYD_BACSU	Aspartate--tRNA ligase OS=Bacillus subtilis (strain 168) GN=aspS PE=3 SV=1	787	66105	18.42	DYLVPSR
122	1::sw|O32038|SYD_BACSU	Aspartate--tRNA ligase OS=Bacillus subtilis (strain 168) GN=aspS PE=3 SV=1	787	66105	23.56	DYLVPSR
122	1::sw|O32038|SYD_BACSU	Aspartate--tRNA ligase OS=Bacillus subtilis (strain 168) GN=aspS PE=3 SV=1	787	66105	21.7	AIGESVTLK
122	1::sw|O32038|SYD_BACSU	Aspartate--tRNA ligase OS=Bacillus subtilis (strain 168) GN=aspS PE=3 SV=1	787	66105	19.96	YGSDKPDTR
122	1::sw|O32038|SYD_BACSU	Aspartate--tRNA ligase OS=Bacillus subtilis (strain 168) GN=aspS PE=3 SV=1	787	66105	21.31	YGSDKPDTR
122	1::sw|O32038|SYD_BACSU	Aspartate--tRNA ligase OS=Bacillus subtilis (strain 168) GN=aspS PE=3 SV=1	787	66105	30.84	YGSDKPDTR
122	1::sw|O32038|SYD_BACSU	Aspartate--tRNA ligase OS=Bacillus subtilis (strain 168) GN=aspS PE=3 SV=1	787	66105	70.71	EALAIAEGIR
122	1::sw|O32038|SYD_BACSU	Aspartate--tRNA ligase OS=Bacillus subtilis (strain 168) GN=aspS PE=3 SV=1	787	66105	20.6	EEGTVNPNLK
122	1::sw|O32038|SYD_BACSU	Aspartate--tRNA ligase OS=Bacillus subtilis (strain 168) GN=aspS PE=3 SV=1	787	66105	33.18	EEGTVNPNLK
122	1::sw|O32038|SYD_BACSU	Aspartate--tRNA ligase OS=Bacillus subtilis (strain 168) GN=aspS PE=3 SV=1	787	66105	23.08	EEGTVNPNLK
122	1::sw|O32038|SYD_BACSU	Aspartate--tRNA ligase OS=Bacillus subtilis (strain 168) GN=aspS PE=3 SV=1	787	66105	40.74	MTYDEAMNK
122	1::sw|O32038|SYD_BACSU	Aspartate--tRNA ligase OS=Bacillus subtilis (strain 168) GN=aspS PE=3 SV=1	787	66105	36.27	QLLMVSGIER
122	1::sw|O32038|SYD_BACSU	Aspartate--tRNA ligase OS=Bacillus subtilis (strain 168) GN=aspS PE=3 SV=1	787	66105	18.35	QLLMVSGIER
122	1::sw|O32038|SYD_BACSU	Aspartate--tRNA ligase OS=Bacillus subtilis (strain 168) GN=aspS PE=3 SV=1	787	66105	52.11	GEELQLPLPR
122	1::sw|O32038|SYD_BACSU	Aspartate--tRNA ligase OS=Bacillus subtilis (strain 168) GN=aspS PE=3 SV=1	787	66105	35.85	QLLMVSGIER	Oxidation (M)
122	1::sw|O32038|SYD_BACSU	Aspartate--tRNA ligase OS=Bacillus subtilis (strain 168) GN=aspS PE=3 SV=1	787	66105	34.78	NEYVLDIQGK
122	1::sw|O32038|SYD_BACSU	Aspartate--tRNA ligase OS=Bacillus subtilis (strain 168) GN=aspS PE=3 SV=1	787	66105	41.82	DLGGLIFIDLR
122	1::sw|O32038|SYD_BACSU	Aspartate--tRNA ligase OS=Bacillus subtilis (strain 168) GN=aspS PE=3 SV=1	787	66105	75.81	DLGGLIFIDLR
122	1::sw|O32038|SYD_BACSU	Aspartate--tRNA ligase OS=Bacillus subtilis (strain 168) GN=aspS PE=3 SV=1	787	66105	69.38	VFSSAVANGGVVK
122	1::sw|O32038|SYD_BACSU	Aspartate--tRNA ligase OS=Bacillus subtilis (strain 168) GN=aspS PE=3 SV=1	787	66105	18.62	TYYCGDITEK
122	1::sw|O32038|SYD_BACSU	Aspartate--tRNA ligase OS=Bacillus subtilis (strain 168) GN=aspS PE=3 SV=1	787	66105	31.24	TYYCGDITEK
122	1::sw|O32038|SYD_BACSU	Aspartate--tRNA ligase OS=Bacillus subtilis (strain 168) GN=aspS PE=3 SV=1	787	66105	71.5	FDMLLTDVSDIVK
122	1::sw|O32038|SYD_BACSU	Aspartate--tRNA ligase OS=Bacillus subtilis (strain 168) GN=aspS PE=3 SV=1	787	66105	21.61	FDMLLTDVSDIVK
122	1::sw|O32038|SYD_BACSU	Aspartate--tRNA ligase OS=Bacillus subtilis (strain 168) GN=aspS PE=3 SV=1	787	66105	105.83	FDMLLTDVSDIVK
122	1::sw|O32038|SYD_BACSU	Aspartate--tRNA ligase OS=Bacillus subtilis (strain 168) GN=aspS PE=3 SV=1	787	66105	71.68	FDMLLTDVSDIVK
122	1::sw|O32038|SYD_BACSU	Aspartate--tRNA ligase OS=Bacillus subtilis (strain 168) GN=aspS PE=3 SV=1	787	66105	61.68	DIDALGAFAANYGAK
122	1::sw|O32038|SYD_BACSU	Aspartate--tRNA ligase OS=Bacillus subtilis (strain 168) GN=aspS PE=3 SV=1	787	66105	69.54	TGIVQVVFNPDVSK
122	1::sw|O32038|SYD_BACSU	Aspartate--tRNA ligase OS=Bacillus subtilis (strain 168) GN=aspS PE=3 SV=1	787	66105	68.8	FDMLLTDVSDIVK	Oxidation (M)
122	1::sw|O32038|SYD_BACSU	Aspartate--tRNA ligase OS=Bacillus subtilis (strain 168) GN=aspS PE=3 SV=1	787	66105	29.87	FYAAHHPFTMPVR
122	1::sw|O32038|SYD_BACSU	Aspartate--tRNA ligase OS=Bacillus subtilis (strain 168) GN=aspS PE=3 SV=1	787	66105	32.39	KDIDALGAFAANYGAK
122	1::sw|O32038|SYD_BACSU	Aspartate--tRNA ligase OS=Bacillus subtilis (strain 168) GN=aspS PE=3 SV=1	787	66105	56.58	EDLELIETAPEDMK
122	1::sw|O32038|SYD_BACSU	Aspartate--tRNA ligase OS=Bacillus subtilis (strain 168) GN=aspS PE=3 SV=1	787	66105	37.71	TGAIEIHADGVNVLNAAK
122	1::sw|O32038|SYD_BACSU	Aspartate--tRNA ligase OS=Bacillus subtilis (strain 168) GN=aspS PE=3 SV=1	787	66105	33.53	VHEGEFYALPQSPQLFK
531	1::sw|O32039|SYH_BACSU	Histidine--tRNA ligase OS=Bacillus subtilis (strain 168) GN=hisS PE=3 SV=1	130	48386	28.85	EMYTFEDR
531	1::sw|O32039|SYH_BACSU	Histidine--tRNA ligase OS=Bacillus subtilis (strain 168) GN=hisS PE=3 SV=1	130	48386	21.15	GVGESTDIVQK
531	1::sw|O32039|SYH_BACSU	Histidine--tRNA ligase OS=Bacillus subtilis (strain 168) GN=hisS PE=3 SV=1	130	48386	27.96	WQFVEQIMR
531	1::sw|O32039|SYH_BACSU	Histidine--tRNA ligase OS=Bacillus subtilis (strain 168) GN=hisS PE=3 SV=1	130	48386	66.48	LVINSLGDQDSR
531	1::sw|O32039|SYH_BACSU	Histidine--tRNA ligase OS=Bacillus subtilis (strain 168) GN=hisS PE=3 SV=1	130	48386	22.33	LVINSLGDQDSR
531	1::sw|O32039|SYH_BACSU	Histidine--tRNA ligase OS=Bacillus subtilis (strain 168) GN=hisS PE=3 SV=1	130	48386	27.6	SLTLRPEGTAAAVR
531	1::sw|O32039|SYH_BACSU	Histidine--tRNA ligase OS=Bacillus subtilis (strain 168) GN=hisS PE=3 SV=1	130	48386	50.72	FIAILGEDELAQNK
565	1::sw|O32045|YRVD_BACSU	Uncharacterized protein YrvD OS=Bacillus subtilis (strain 168) GN=yrvD PE=4 SV=1	117	12227	75.73	SVEVDYLFGR
565	1::sw|O32045|YRVD_BACSU	Uncharacterized protein YrvD OS=Bacillus subtilis (strain 168) GN=yrvD PE=4 SV=1	117	12227	32.46	SVEVDYLFGR
565	1::sw|O32045|YRVD_BACSU	Uncharacterized protein YrvD OS=Bacillus subtilis (strain 168) GN=yrvD PE=4 SV=1	117	12227	41.82	QEDTHLADQTDTQDASAMIEK
27	1::sw|O32047|SECDF_BACSU	Protein translocase subunit SecDF OS=Bacillus subtilis (strain 168) GN=secDF PE=1 SV=2	2250	81603	40.73	GWFGVNK
27	1::sw|O32047|SECDF_BACSU	Protein translocase subunit SecDF OS=Bacillus subtilis (strain 168) GN=secDF PE=1 SV=2	2250	81603	27.32	GWFGVNK
27	1::sw|O32047|SECDF_BACSU	Protein translocase subunit SecDF OS=Bacillus subtilis (strain 168) GN=secDF PE=1 SV=2	2250	81603	30.86	LTTEQVEK
27	1::sw|O32047|SECDF_BACSU	Protein translocase subunit SecDF OS=Bacillus subtilis (strain 168) GN=secDF PE=1 SV=2	2250	81603	30.81	IEVQSDHK
27	1::sw|O32047|SECDF_BACSU	Protein translocase subunit SecDF OS=Bacillus subtilis (strain 168) GN=secDF PE=1 SV=2	2250	81603	37.32	IEVQSDHK
27	1::sw|O32047|SECDF_BACSU	Protein translocase subunit SecDF OS=Bacillus subtilis (strain 168) GN=secDF PE=1 SV=2	2250	81603	29.84	IEVQSDHK
27	1::sw|O32047|SECDF_BACSU	Protein translocase subunit SecDF OS=Bacillus subtilis (strain 168) GN=secDF PE=1 SV=2	2250	81603	40.02	IEVQSDHK
27	1::sw|O32047|SECDF_BACSU	Protein translocase subunit SecDF OS=Bacillus subtilis (strain 168) GN=secDF PE=1 SV=2	2250	81603	28	IEVQSDHK
27	1::sw|O32047|SECDF_BACSU	Protein translocase subunit SecDF OS=Bacillus subtilis (strain 168) GN=secDF PE=1 SV=2	2250	81603	28.7	IEVQSDHK
27	1::sw|O32047|SECDF_BACSU	Protein translocase subunit SecDF OS=Bacillus subtilis (strain 168) GN=secDF PE=1 SV=2	2250	81603	35.34	IEVQSDHK
27	1::sw|O32047|SECDF_BACSU	Protein translocase subunit SecDF OS=Bacillus subtilis (strain 168) GN=secDF PE=1 SV=2	2250	81603	21.95	DADKFGEVTK
27	1::sw|O32047|SECDF_BACSU	Protein translocase subunit SecDF OS=Bacillus subtilis (strain 168) GN=secDF PE=1 SV=2	2250	81603	40.28	DADKFGEVTK
27	1::sw|O32047|SECDF_BACSU	Protein translocase subunit SecDF OS=Bacillus subtilis (strain 168) GN=secDF PE=1 SV=2	2250	81603	80.05	FLLALLVESR
27	1::sw|O32047|SECDF_BACSU	Protein translocase subunit SecDF OS=Bacillus subtilis (strain 168) GN=secDF PE=1 SV=2	2250	81603	67.47	FLLALLVESR
27	1::sw|O32047|SECDF_BACSU	Protein translocase subunit SecDF OS=Bacillus subtilis (strain 168) GN=secDF PE=1 SV=2	2250	81603	61.32	FLLALLVESR
27	1::sw|O32047|SECDF_BACSU	Protein translocase subunit SecDF OS=Bacillus subtilis (strain 168) GN=secDF PE=1 SV=2	2250	81603	60.73	FLLALLVESR
27	1::sw|O32047|SECDF_BACSU	Protein translocase subunit SecDF OS=Bacillus subtilis (strain 168) GN=secDF PE=1 SV=2	2250	81603	22.5	VQLAGVTNQNR
27	1::sw|O32047|SECDF_BACSU	Protein translocase subunit SecDF OS=Bacillus subtilis (strain 168) GN=secDF PE=1 SV=2	2250	81603	24.05	VQLAGVTNQNR
27	1::sw|O32047|SECDF_BACSU	Protein translocase subunit SecDF OS=Bacillus subtilis (strain 168) GN=secDF PE=1 SV=2	2250	81603	64.65	VQLAGVTNQNR
27	1::sw|O32047|SECDF_BACSU	Protein translocase subunit SecDF OS=Bacillus subtilis (strain 168) GN=secDF PE=1 SV=2	2250	81603	73.42	VQLAGVTNQNR
27	1::sw|O32047|SECDF_BACSU	Protein translocase subunit SecDF OS=Bacillus subtilis (strain 168) GN=secDF PE=1 SV=2	2250	81603	46.27	VQLAGVTNQNR
27	1::sw|O32047|SECDF_BACSU	Protein translocase subunit SecDF OS=Bacillus subtilis (strain 168) GN=secDF PE=1 SV=2	2250	81603	47.82	IEGHFTAQEAK
27	1::sw|O32047|SECDF_BACSU	Protein translocase subunit SecDF OS=Bacillus subtilis (strain 168) GN=secDF PE=1 SV=2	2250	81603	48.85	IEGHFTAQEAK
27	1::sw|O32047|SECDF_BACSU	Protein translocase subunit SecDF OS=Bacillus subtilis (strain 168) GN=secDF PE=1 SV=2	2250	81603	19.82	IEGHFTAQEAK
27	1::sw|O32047|SECDF_BACSU	Protein translocase subunit SecDF OS=Bacillus subtilis (strain 168) GN=secDF PE=1 SV=2	2250	81603	19.78	IEGHFTAQEAK
27	1::sw|O32047|SECDF_BACSU	Protein translocase subunit SecDF OS=Bacillus subtilis (strain 168) GN=secDF PE=1 SV=2	2250	81603	22.17	IEGHFTAQEAK
27	1::sw|O32047|SECDF_BACSU	Protein translocase subunit SecDF OS=Bacillus subtilis (strain 168) GN=secDF PE=1 SV=2	2250	81603	68.81	IEGHFTAQEAK
27	1::sw|O32047|SECDF_BACSU	Protein translocase subunit SecDF OS=Bacillus subtilis (strain 168) GN=secDF PE=1 SV=2	2250	81603	59.44	IEGHFTAQEAK
27	1::sw|O32047|SECDF_BACSU	Protein translocase subunit SecDF OS=Bacillus subtilis (strain 168) GN=secDF PE=1 SV=2	2250	81603	24.65	IEGHFTAQEAK
27	1::sw|O32047|SECDF_BACSU	Protein translocase subunit SecDF OS=Bacillus subtilis (strain 168) GN=secDF PE=1 SV=2	2250	81603	67.11	LNLGIDFASGAR
27	1::sw|O32047|SECDF_BACSU	Protein translocase subunit SecDF OS=Bacillus subtilis (strain 168) GN=secDF PE=1 SV=2	2250	81603	29.64	FVGVPDKETIAK
27	1::sw|O32047|SECDF_BACSU	Protein translocase subunit SecDF OS=Bacillus subtilis (strain 168) GN=secDF PE=1 SV=2	2250	81603	34.18	FVGVPDKETIAK
27	1::sw|O32047|SECDF_BACSU	Protein translocase subunit SecDF OS=Bacillus subtilis (strain 168) GN=secDF PE=1 SV=2	2250	81603	29.5	FVGVPDKETIAK
27	1::sw|O32047|SECDF_BACSU	Protein translocase subunit SecDF OS=Bacillus subtilis (strain 168) GN=secDF PE=1 SV=2	2250	81603	25.08	FVGVPDKETIAK
27	1::sw|O32047|SECDF_BACSU	Protein translocase subunit SecDF OS=Bacillus subtilis (strain 168) GN=secDF PE=1 SV=2	2250	81603	53.45	FVGVPDKETIAK
27	1::sw|O32047|SECDF_BACSU	Protein translocase subunit SecDF OS=Bacillus subtilis (strain 168) GN=secDF PE=1 SV=2	2250	81603	37.18	FVGVPDKETIAK
27	1::sw|O32047|SECDF_BACSU	Protein translocase subunit SecDF OS=Bacillus subtilis (strain 168) GN=secDF PE=1 SV=2	2250	81603	46.4	FVGVPDKETIAK
27	1::sw|O32047|SECDF_BACSU	Protein translocase subunit SecDF OS=Bacillus subtilis (strain 168) GN=secDF PE=1 SV=2	2250	81603	56.36	FVGVPDKETIAK
27	1::sw|O32047|SECDF_BACSU	Protein translocase subunit SecDF OS=Bacillus subtilis (strain 168) GN=secDF PE=1 SV=2	2250	81603	40.87	FVGVPDKETIAK
27	1::sw|O32047|SECDF_BACSU	Protein translocase subunit SecDF OS=Bacillus subtilis (strain 168) GN=secDF PE=1 SV=2	2250	81603	47.23	FVGVPDKETIAK
27	1::sw|O32047|SECDF_BACSU	Protein translocase subunit SecDF OS=Bacillus subtilis (strain 168) GN=secDF PE=1 SV=2	2250	81603	54.52	FVGVPDKETIAK
27	1::sw|O32047|SECDF_BACSU	Protein translocase subunit SecDF OS=Bacillus subtilis (strain 168) GN=secDF PE=1 SV=2	2250	81603	36.43	FVGVPDKETIAK
27	1::sw|O32047|SECDF_BACSU	Protein translocase subunit SecDF OS=Bacillus subtilis (strain 168) GN=secDF PE=1 SV=2	2250	81603	55.14	FVGVPDKETIAK
27	1::sw|O32047|SECDF_BACSU	Protein translocase subunit SecDF OS=Bacillus subtilis (strain 168) GN=secDF PE=1 SV=2	2250	81603	42.65	FVGVPDKETIAK
27	1::sw|O32047|SECDF_BACSU	Protein translocase subunit SecDF OS=Bacillus subtilis (strain 168) GN=secDF PE=1 SV=2	2250	81603	43.6	FVGVPDKETIAK
27	1::sw|O32047|SECDF_BACSU	Protein translocase subunit SecDF OS=Bacillus subtilis (strain 168) GN=secDF PE=1 SV=2	2250	81603	57.58	FVGVPDKETIAK
27	1::sw|O32047|SECDF_BACSU	Protein translocase subunit SecDF OS=Bacillus subtilis (strain 168) GN=secDF PE=1 SV=2	2250	81603	18.29	FVGVPDKETIAK
27	1::sw|O32047|SECDF_BACSU	Protein translocase subunit SecDF OS=Bacillus subtilis (strain 168) GN=secDF PE=1 SV=2	2250	81603	22.27	FVGVPDKETIAK
27	1::sw|O32047|SECDF_BACSU	Protein translocase subunit SecDF OS=Bacillus subtilis (strain 168) GN=secDF PE=1 SV=2	2250	81603	21.11	FVGVPDKETIAK
27	1::sw|O32047|SECDF_BACSU	Protein translocase subunit SecDF OS=Bacillus subtilis (strain 168) GN=secDF PE=1 SV=2	2250	81603	18.11	FVGVPDKETIAK
27	1::sw|O32047|SECDF_BACSU	Protein translocase subunit SecDF OS=Bacillus subtilis (strain 168) GN=secDF PE=1 SV=2	2250	81603	29.8	FVGVPDKETIAK
27	1::sw|O32047|SECDF_BACSU	Protein translocase subunit SecDF OS=Bacillus subtilis (strain 168) GN=secDF PE=1 SV=2	2250	81603	18.86	FVGVPDKETIAK
27	1::sw|O32047|SECDF_BACSU	Protein translocase subunit SecDF OS=Bacillus subtilis (strain 168) GN=secDF PE=1 SV=2	2250	81603	19.67	FVGVPDKETIAK
27	1::sw|O32047|SECDF_BACSU	Protein translocase subunit SecDF OS=Bacillus subtilis (strain 168) GN=secDF PE=1 SV=2	2250	81603	29.95	DVLVSTVEALNR
27	1::sw|O32047|SECDF_BACSU	Protein translocase subunit SecDF OS=Bacillus subtilis (strain 168) GN=secDF PE=1 SV=2	2250	81603	37.99	DVLVSTVEALNR
27	1::sw|O32047|SECDF_BACSU	Protein translocase subunit SecDF OS=Bacillus subtilis (strain 168) GN=secDF PE=1 SV=2	2250	81603	87.13	DVLVSTVEALNR
27	1::sw|O32047|SECDF_BACSU	Protein translocase subunit SecDF OS=Bacillus subtilis (strain 168) GN=secDF PE=1 SV=2	2250	81603	75.9	DVLVSTVEALNR
27	1::sw|O32047|SECDF_BACSU	Protein translocase subunit SecDF OS=Bacillus subtilis (strain 168) GN=secDF PE=1 SV=2	2250	81603	21.49	DVLVSTVEALNR
27	1::sw|O32047|SECDF_BACSU	Protein translocase subunit SecDF OS=Bacillus subtilis (strain 168) GN=secDF PE=1 SV=2	2250	81603	90.53	DVLVSTVEALNR
27	1::sw|O32047|SECDF_BACSU	Protein translocase subunit SecDF OS=Bacillus subtilis (strain 168) GN=secDF PE=1 SV=2	2250	81603	73.08	EILATEAQLSFR
27	1::sw|O32047|SECDF_BACSU	Protein translocase subunit SecDF OS=Bacillus subtilis (strain 168) GN=secDF PE=1 SV=2	2250	81603	82.03	EILATEAQLSFR
27	1::sw|O32047|SECDF_BACSU	Protein translocase subunit SecDF OS=Bacillus subtilis (strain 168) GN=secDF PE=1 SV=2	2250	81603	78.01	EILATEAQLSFR
27	1::sw|O32047|SECDF_BACSU	Protein translocase subunit SecDF OS=Bacillus subtilis (strain 168) GN=secDF PE=1 SV=2	2250	81603	73.27	EILATEAQLSFR
27	1::sw|O32047|SECDF_BACSU	Protein translocase subunit SecDF OS=Bacillus subtilis (strain 168) GN=secDF PE=1 SV=2	2250	81603	90.97	DLASILNAGALPVK
27	1::sw|O32047|SECDF_BACSU	Protein translocase subunit SecDF OS=Bacillus subtilis (strain 168) GN=secDF PE=1 SV=2	2250	81603	87.32	DLASILNAGALPVK
27	1::sw|O32047|SECDF_BACSU	Protein translocase subunit SecDF OS=Bacillus subtilis (strain 168) GN=secDF PE=1 SV=2	2250	81603	61.42	DLASILNAGALPVK
27	1::sw|O32047|SECDF_BACSU	Protein translocase subunit SecDF OS=Bacillus subtilis (strain 168) GN=secDF PE=1 SV=2	2250	81603	72.81	DLASILNAGALPVK
27	1::sw|O32047|SECDF_BACSU	Protein translocase subunit SecDF OS=Bacillus subtilis (strain 168) GN=secDF PE=1 SV=2	2250	81603	63.38	YGSDPNVSTVSPTVGK
27	1::sw|O32047|SECDF_BACSU	Protein translocase subunit SecDF OS=Bacillus subtilis (strain 168) GN=secDF PE=1 SV=2	2250	81603	42.69	YGSDPNVSTVSPTVGK
27	1::sw|O32047|SECDF_BACSU	Protein translocase subunit SecDF OS=Bacillus subtilis (strain 168) GN=secDF PE=1 SV=2	2250	81603	47.61	YGSDPNVSTVSPTVGK
27	1::sw|O32047|SECDF_BACSU	Protein translocase subunit SecDF OS=Bacillus subtilis (strain 168) GN=secDF PE=1 SV=2	2250	81603	58.57	YGSDPNVSTVSPTVGK
27	1::sw|O32047|SECDF_BACSU	Protein translocase subunit SecDF OS=Bacillus subtilis (strain 168) GN=secDF PE=1 SV=2	2250	81603	53	YGSDPNVSTVSPTVGK
27	1::sw|O32047|SECDF_BACSU	Protein translocase subunit SecDF OS=Bacillus subtilis (strain 168) GN=secDF PE=1 SV=2	2250	81603	63.14	YGSDPNVSTVSPTVGK
27	1::sw|O32047|SECDF_BACSU	Protein translocase subunit SecDF OS=Bacillus subtilis (strain 168) GN=secDF PE=1 SV=2	2250	81603	47.82	QTYDSTTNEPIVTIK
27	1::sw|O32047|SECDF_BACSU	Protein translocase subunit SecDF OS=Bacillus subtilis (strain 168) GN=secDF PE=1 SV=2	2250	81603	70.46	QTYDSTTNEPIVTIK
27	1::sw|O32047|SECDF_BACSU	Protein translocase subunit SecDF OS=Bacillus subtilis (strain 168) GN=secDF PE=1 SV=2	2250	81603	81.39	FVSAPNVSQELNTTDVK
27	1::sw|O32047|SECDF_BACSU	Protein translocase subunit SecDF OS=Bacillus subtilis (strain 168) GN=secDF PE=1 SV=2	2250	81603	66.57	FVSAPNVSQELNTTDVK
27	1::sw|O32047|SECDF_BACSU	Protein translocase subunit SecDF OS=Bacillus subtilis (strain 168) GN=secDF PE=1 SV=2	2250	81603	67.72	DFESLGMDPDTVVLSGEK
27	1::sw|O32047|SECDF_BACSU	Protein translocase subunit SecDF OS=Bacillus subtilis (strain 168) GN=secDF PE=1 SV=2	2250	81603	69.58	DFESLGMDPDTVVLSGEK
27	1::sw|O32047|SECDF_BACSU	Protein translocase subunit SecDF OS=Bacillus subtilis (strain 168) GN=secDF PE=1 SV=2	2250	81603	59.79	TFADLNHIVNLSLQQTFTR
27	1::sw|O32047|SECDF_BACSU	Protein translocase subunit SecDF OS=Bacillus subtilis (strain 168) GN=secDF PE=1 SV=2	2250	81603	39.58	HIMDIQDTDENTEPHTPFQK
27	1::sw|O32047|SECDF_BACSU	Protein translocase subunit SecDF OS=Bacillus subtilis (strain 168) GN=secDF PE=1 SV=2	2250	81603	36.87	HIMDIQDTDENTEPHTPFQK
175	1::sw|O32052|YRBF_BACSU	UPF0092 membrane protein YrbF OS=Bacillus subtilis (strain 168) GN=yrbF PE=3 SV=1	526	9897	22.47	LTFDRR
175	1::sw|O32052|YRBF_BACSU	UPF0092 membrane protein YrbF OS=Bacillus subtilis (strain 168) GN=yrbF PE=3 SV=1	526	9897	23.08	LTFDRR
175	1::sw|O32052|YRBF_BACSU	UPF0092 membrane protein YrbF OS=Bacillus subtilis (strain 168) GN=yrbF PE=3 SV=1	526	9897	44.42	QMQEELK
175	1::sw|O32052|YRBF_BACSU	UPF0092 membrane protein YrbF OS=Bacillus subtilis (strain 168) GN=yrbF PE=3 SV=1	526	9897	27.65	QMQEELK
175	1::sw|O32052|YRBF_BACSU	UPF0092 membrane protein YrbF OS=Bacillus subtilis (strain 168) GN=yrbF PE=3 SV=1	526	9897	43.36	QMQEELK
175	1::sw|O32052|YRBF_BACSU	UPF0092 membrane protein YrbF OS=Bacillus subtilis (strain 168) GN=yrbF PE=3 SV=1	526	9897	40.84	QMQEELK
175	1::sw|O32052|YRBF_BACSU	UPF0092 membrane protein YrbF OS=Bacillus subtilis (strain 168) GN=yrbF PE=3 SV=1	526	9897	43.58	QMQEELK
175	1::sw|O32052|YRBF_BACSU	UPF0092 membrane protein YrbF OS=Bacillus subtilis (strain 168) GN=yrbF PE=3 SV=1	526	9897	31.72	QMQEELK	Oxidation (M)
175	1::sw|O32052|YRBF_BACSU	UPF0092 membrane protein YrbF OS=Bacillus subtilis (strain 168) GN=yrbF PE=3 SV=1	526	9897	34.68	QMQEELK	Oxidation (M)
175	1::sw|O32052|YRBF_BACSU	UPF0092 membrane protein YrbF OS=Bacillus subtilis (strain 168) GN=yrbF PE=3 SV=1	526	9897	29.53	QMQEELK	Oxidation (M)
175	1::sw|O32052|YRBF_BACSU	UPF0092 membrane protein YrbF OS=Bacillus subtilis (strain 168) GN=yrbF PE=3 SV=1	526	9897	37.73	QMQEELK	Oxidation (M)
175	1::sw|O32052|YRBF_BACSU	UPF0092 membrane protein YrbF OS=Bacillus subtilis (strain 168) GN=yrbF PE=3 SV=1	526	9897	40.35	QMQEELK	Oxidation (M)
175	1::sw|O32052|YRBF_BACSU	UPF0092 membrane protein YrbF OS=Bacillus subtilis (strain 168) GN=yrbF PE=3 SV=1	526	9897	29.98	QMQEELK	Oxidation (M)
175	1::sw|O32052|YRBF_BACSU	UPF0092 membrane protein YrbF OS=Bacillus subtilis (strain 168) GN=yrbF PE=3 SV=1	526	9897	19.77	QMQEELK	Oxidation (M)
175	1::sw|O32052|YRBF_BACSU	UPF0092 membrane protein YrbF OS=Bacillus subtilis (strain 168) GN=yrbF PE=3 SV=1	526	9897	22.2	QMQEELK	Oxidation (M)
175	1::sw|O32052|YRBF_BACSU	UPF0092 membrane protein YrbF OS=Bacillus subtilis (strain 168) GN=yrbF PE=3 SV=1	526	9897	27.15	AIREVSAAE
175	1::sw|O32052|YRBF_BACSU	UPF0092 membrane protein YrbF OS=Bacillus subtilis (strain 168) GN=yrbF PE=3 SV=1	526	9897	27.25	AIREVSAAE
175	1::sw|O32052|YRBF_BACSU	UPF0092 membrane protein YrbF OS=Bacillus subtilis (strain 168) GN=yrbF PE=3 SV=1	526	9897	39.19	QMQEELKK
175	1::sw|O32052|YRBF_BACSU	UPF0092 membrane protein YrbF OS=Bacillus subtilis (strain 168) GN=yrbF PE=3 SV=1	526	9897	30.3	QMQEELKK
175	1::sw|O32052|YRBF_BACSU	UPF0092 membrane protein YrbF OS=Bacillus subtilis (strain 168) GN=yrbF PE=3 SV=1	526	9897	26.31	QMQEELKK
175	1::sw|O32052|YRBF_BACSU	UPF0092 membrane protein YrbF OS=Bacillus subtilis (strain 168) GN=yrbF PE=3 SV=1	526	9897	63.74	GDSVVTIGGLHGTVDSIDESK
175	1::sw|O32052|YRBF_BACSU	UPF0092 membrane protein YrbF OS=Bacillus subtilis (strain 168) GN=yrbF PE=3 SV=1	526	9897	67.09	GDSVVTIGGLHGTVDSIDESK
175	1::sw|O32052|YRBF_BACSU	UPF0092 membrane protein YrbF OS=Bacillus subtilis (strain 168) GN=yrbF PE=3 SV=1	526	9897	59.2	GDSVVTIGGLHGTVDSIDESK
175	1::sw|O32052|YRBF_BACSU	UPF0092 membrane protein YrbF OS=Bacillus subtilis (strain 168) GN=yrbF PE=3 SV=1	526	9897	47.53	KGDSVVTIGGLHGTVDSIDESK
175	1::sw|O32052|YRBF_BACSU	UPF0092 membrane protein YrbF OS=Bacillus subtilis (strain 168) GN=yrbF PE=3 SV=1	526	9897	80.09	KGDSVVTIGGLHGTVDSIDESK
175	1::sw|O32052|YRBF_BACSU	UPF0092 membrane protein YrbF OS=Bacillus subtilis (strain 168) GN=yrbF PE=3 SV=1	526	9897	47.56	KGDSVVTIGGLHGTVDSIDESK
175	1::sw|O32052|YRBF_BACSU	UPF0092 membrane protein YrbF OS=Bacillus subtilis (strain 168) GN=yrbF PE=3 SV=1	526	9897	50.22	KGDSVVTIGGLHGTVDSIDESK
175	1::sw|O32052|YRBF_BACSU	UPF0092 membrane protein YrbF OS=Bacillus subtilis (strain 168) GN=yrbF PE=3 SV=1	526	9897	44.91	KGDSVVTIGGLHGTVDSIDESK
175	1::sw|O32052|YRBF_BACSU	UPF0092 membrane protein YrbF OS=Bacillus subtilis (strain 168) GN=yrbF PE=3 SV=1	526	9897	46.27	KGDSVVTIGGLHGTVDSIDESK
1022	1::sw|O32060|YRBD_BACSU	Putative sodium/proton-dependent alanine carrier protein YrbD OS=Bacillus subtilis (strain 168) GN=yrbD PE=3 SV=2	29	51590	29.38	EYTHESER
705	1::sw|O32074|THIT_BACSU	Thiamine transporter ThiT OS=Bacillus subtilis (strain 168) GN=thiT PE=1 SV=1	78	20609	59.22	LIVSVVSAVFIGSLLR
705	1::sw|O32074|THIT_BACSU	Thiamine transporter ThiT OS=Bacillus subtilis (strain 168) GN=thiT PE=1 SV=1	78	20609	39.39	YAAHVISGAVFFGSFAPK
1099	1::sw|O32075|YUAI_BACSU	Uncharacterized N-acetyltransferase YuaI OS=Bacillus subtilis (strain 168) GN=yuaI PE=3 SV=1	21	19830	20.98	ALLAK
44	1::sw|O32076|YUAG_BACSU	Uncharacterized protein YuaG OS=Bacillus subtilis (strain 168) GN=yuaG PE=4 SV=1	1524	55959	25.85	VASQDLAK
44	1::sw|O32076|YUAG_BACSU	Uncharacterized protein YuaG OS=Bacillus subtilis (strain 168) GN=yuaG PE=4 SV=1	1524	55959	33.52	VASQDLAK
44	1::sw|O32076|YUAG_BACSU	Uncharacterized protein YuaG OS=Bacillus subtilis (strain 168) GN=yuaG PE=4 SV=1	1524	55959	37.51	VASQDLAK
44	1::sw|O32076|YUAG_BACSU	Uncharacterized protein YuaG OS=Bacillus subtilis (strain 168) GN=yuaG PE=4 SV=1	1524	55959	39.64	VASQDLAK
44	1::sw|O32076|YUAG_BACSU	Uncharacterized protein YuaG OS=Bacillus subtilis (strain 168) GN=yuaG PE=4 SV=1	1524	55959	19.26	VASQDLAK
44	1::sw|O32076|YUAG_BACSU	Uncharacterized protein YuaG OS=Bacillus subtilis (strain 168) GN=yuaG PE=4 SV=1	1524	55959	25.14	QLAEADAK
44	1::sw|O32076|YUAG_BACSU	Uncharacterized protein YuaG OS=Bacillus subtilis (strain 168) GN=yuaG PE=4 SV=1	1524	55959	37.71	QLAEADAK
44	1::sw|O32076|YUAG_BACSU	Uncharacterized protein YuaG OS=Bacillus subtilis (strain 168) GN=yuaG PE=4 SV=1	1524	55959	18.57	QYDSEVK
44	1::sw|O32076|YUAG_BACSU	Uncharacterized protein YuaG OS=Bacillus subtilis (strain 168) GN=yuaG PE=4 SV=1	1524	55959	29.56	QIELEEK
44	1::sw|O32076|YUAG_BACSU	Uncharacterized protein YuaG OS=Bacillus subtilis (strain 168) GN=yuaG PE=4 SV=1	1524	55959	27.54	FSQEVQR
44	1::sw|O32076|YUAG_BACSU	Uncharacterized protein YuaG OS=Bacillus subtilis (strain 168) GN=yuaG PE=4 SV=1	1524	55959	49.25	FSQEVQR
44	1::sw|O32076|YUAG_BACSU	Uncharacterized protein YuaG OS=Bacillus subtilis (strain 168) GN=yuaG PE=4 SV=1	1524	55959	27.43	YSIEAMAK
44	1::sw|O32076|YUAG_BACSU	Uncharacterized protein YuaG OS=Bacillus subtilis (strain 168) GN=yuaG PE=4 SV=1	1524	55959	45.56	EVLEGHLR
44	1::sw|O32076|YUAG_BACSU	Uncharacterized protein YuaG OS=Bacillus subtilis (strain 168) GN=yuaG PE=4 SV=1	1524	55959	36.54	EVLEGHLR
44	1::sw|O32076|YUAG_BACSU	Uncharacterized protein YuaG OS=Bacillus subtilis (strain 168) GN=yuaG PE=4 SV=1	1524	55959	33.53	ATEIAEAEK
44	1::sw|O32076|YUAG_BACSU	Uncharacterized protein YuaG OS=Bacillus subtilis (strain 168) GN=yuaG PE=4 SV=1	1524	55959	20.22	QYDSEVKK
44	1::sw|O32076|YUAG_BACSU	Uncharacterized protein YuaG OS=Bacillus subtilis (strain 168) GN=yuaG PE=4 SV=1	1524	55959	23.36	KYSIEAMAK
44	1::sw|O32076|YUAG_BACSU	Uncharacterized protein YuaG OS=Bacillus subtilis (strain 168) GN=yuaG PE=4 SV=1	1524	55959	32.79	EMLENFSGK
44	1::sw|O32076|YUAG_BACSU	Uncharacterized protein YuaG OS=Bacillus subtilis (strain 168) GN=yuaG PE=4 SV=1	1524	55959	32.38	EMLENFSGK
44	1::sw|O32076|YUAG_BACSU	Uncharacterized protein YuaG OS=Bacillus subtilis (strain 168) GN=yuaG PE=4 SV=1	1524	55959	21.95	NVHVDEGGNR
44	1::sw|O32076|YUAG_BACSU	Uncharacterized protein YuaG OS=Bacillus subtilis (strain 168) GN=yuaG PE=4 SV=1	1524	55959	19.5	NVHVDEGGNR
44	1::sw|O32076|YUAG_BACSU	Uncharacterized protein YuaG OS=Bacillus subtilis (strain 168) GN=yuaG PE=4 SV=1	1524	55959	35.7	NVHVDEGGNR
44	1::sw|O32076|YUAG_BACSU	Uncharacterized protein YuaG OS=Bacillus subtilis (strain 168) GN=yuaG PE=4 SV=1	1524	55959	29.52	NVHVDEGGNR
44	1::sw|O32076|YUAG_BACSU	Uncharacterized protein YuaG OS=Bacillus subtilis (strain 168) GN=yuaG PE=4 SV=1	1524	55959	31.53	NVHVDEGGNR
44	1::sw|O32076|YUAG_BACSU	Uncharacterized protein YuaG OS=Bacillus subtilis (strain 168) GN=yuaG PE=4 SV=1	1524	55959	28.72	NVHVDEGGNR
44	1::sw|O32076|YUAG_BACSU	Uncharacterized protein YuaG OS=Bacillus subtilis (strain 168) GN=yuaG PE=4 SV=1	1524	55959	23.93	QAAAPLSNIDK
44	1::sw|O32076|YUAG_BACSU	Uncharacterized protein YuaG OS=Bacillus subtilis (strain 168) GN=yuaG PE=4 SV=1	1524	55959	18.28	QAAAPLSNIDK
44	1::sw|O32076|YUAG_BACSU	Uncharacterized protein YuaG OS=Bacillus subtilis (strain 168) GN=yuaG PE=4 SV=1	1524	55959	24	QAAAPLSNIDK
44	1::sw|O32076|YUAG_BACSU	Uncharacterized protein YuaG OS=Bacillus subtilis (strain 168) GN=yuaG PE=4 SV=1	1524	55959	60.75	YSVEQSAAAEK
44	1::sw|O32076|YUAG_BACSU	Uncharacterized protein YuaG OS=Bacillus subtilis (strain 168) GN=yuaG PE=4 SV=1	1524	55959	58.88	YSVEQSAAAEK
44	1::sw|O32076|YUAG_BACSU	Uncharacterized protein YuaG OS=Bacillus subtilis (strain 168) GN=yuaG PE=4 SV=1	1524	55959	68.07	YSVEQSAAAEK
44	1::sw|O32076|YUAG_BACSU	Uncharacterized protein YuaG OS=Bacillus subtilis (strain 168) GN=yuaG PE=4 SV=1	1524	55959	21.97	YSVEQSAAAEK
44	1::sw|O32076|YUAG_BACSU	Uncharacterized protein YuaG OS=Bacillus subtilis (strain 168) GN=yuaG PE=4 SV=1	1524	55959	47.75	AKGETEAEVIR
44	1::sw|O32076|YUAG_BACSU	Uncharacterized protein YuaG OS=Bacillus subtilis (strain 168) GN=yuaG PE=4 SV=1	1524	55959	39.16	AKGETEAEVIR
44	1::sw|O32076|YUAG_BACSU	Uncharacterized protein YuaG OS=Bacillus subtilis (strain 168) GN=yuaG PE=4 SV=1	1524	55959	41.32	AKGETEAEVIR
44	1::sw|O32076|YUAG_BACSU	Uncharacterized protein YuaG OS=Bacillus subtilis (strain 168) GN=yuaG PE=4 SV=1	1524	55959	51.82	AKGETEAEVIR
44	1::sw|O32076|YUAG_BACSU	Uncharacterized protein YuaG OS=Bacillus subtilis (strain 168) GN=yuaG PE=4 SV=1	1524	55959	47.58	AKGETEAEVIR
44	1::sw|O32076|YUAG_BACSU	Uncharacterized protein YuaG OS=Bacillus subtilis (strain 168) GN=yuaG PE=4 SV=1	1524	55959	38.48	MGLVIVSFTIK
44	1::sw|O32076|YUAG_BACSU	Uncharacterized protein YuaG OS=Bacillus subtilis (strain 168) GN=yuaG PE=4 SV=1	1524	55959	50.4	MGLVIVSFTIK
44	1::sw|O32076|YUAG_BACSU	Uncharacterized protein YuaG OS=Bacillus subtilis (strain 168) GN=yuaG PE=4 SV=1	1524	55959	40.83	MGLVIVSFTIK
44	1::sw|O32076|YUAG_BACSU	Uncharacterized protein YuaG OS=Bacillus subtilis (strain 168) GN=yuaG PE=4 SV=1	1524	55959	22.45	NGYLESLGKPR
44	1::sw|O32076|YUAG_BACSU	Uncharacterized protein YuaG OS=Bacillus subtilis (strain 168) GN=yuaG PE=4 SV=1	1524	55959	27.64	NGYLESLGKPR
44	1::sw|O32076|YUAG_BACSU	Uncharacterized protein YuaG OS=Bacillus subtilis (strain 168) GN=yuaG PE=4 SV=1	1524	55959	39.35	QSINELTNEIK
44	1::sw|O32076|YUAG_BACSU	Uncharacterized protein YuaG OS=Bacillus subtilis (strain 168) GN=yuaG PE=4 SV=1	1524	55959	44.82	QQVTEQEMQVK
44	1::sw|O32076|YUAG_BACSU	Uncharacterized protein YuaG OS=Bacillus subtilis (strain 168) GN=yuaG PE=4 SV=1	1524	55959	50.85	QQVTEQEMQVK
44	1::sw|O32076|YUAG_BACSU	Uncharacterized protein YuaG OS=Bacillus subtilis (strain 168) GN=yuaG PE=4 SV=1	1524	55959	110.43	ANADQAYDLETAR
44	1::sw|O32076|YUAG_BACSU	Uncharacterized protein YuaG OS=Bacillus subtilis (strain 168) GN=yuaG PE=4 SV=1	1524	55959	79.87	ANADQAYDLETAR
44	1::sw|O32076|YUAG_BACSU	Uncharacterized protein YuaG OS=Bacillus subtilis (strain 168) GN=yuaG PE=4 SV=1	1524	55959	114.75	ANADQAYDLETAR
44	1::sw|O32076|YUAG_BACSU	Uncharacterized protein YuaG OS=Bacillus subtilis (strain 168) GN=yuaG PE=4 SV=1	1524	55959	126.6	ANADQAYDLETAR
44	1::sw|O32076|YUAG_BACSU	Uncharacterized protein YuaG OS=Bacillus subtilis (strain 168) GN=yuaG PE=4 SV=1	1524	55959	23.22	ANADQAYDLETAR
44	1::sw|O32076|YUAG_BACSU	Uncharacterized protein YuaG OS=Bacillus subtilis (strain 168) GN=yuaG PE=4 SV=1	1524	55959	80.67	SILGSMTVEEIYK
44	1::sw|O32076|YUAG_BACSU	Uncharacterized protein YuaG OS=Bacillus subtilis (strain 168) GN=yuaG PE=4 SV=1	1524	55959	91.28	SILGSMTVEEIYK
44	1::sw|O32076|YUAG_BACSU	Uncharacterized protein YuaG OS=Bacillus subtilis (strain 168) GN=yuaG PE=4 SV=1	1524	55959	33.41	DADIATAEADKETR
44	1::sw|O32076|YUAG_BACSU	Uncharacterized protein YuaG OS=Bacillus subtilis (strain 168) GN=yuaG PE=4 SV=1	1524	55959	62.2	DADIATAEADKETR
44	1::sw|O32076|YUAG_BACSU	Uncharacterized protein YuaG OS=Bacillus subtilis (strain 168) GN=yuaG PE=4 SV=1	1524	55959	61.5	DADIATAEADKETR
44	1::sw|O32076|YUAG_BACSU	Uncharacterized protein YuaG OS=Bacillus subtilis (strain 168) GN=yuaG PE=4 SV=1	1524	55959	67.09	DADIATAEADKETR
44	1::sw|O32076|YUAG_BACSU	Uncharacterized protein YuaG OS=Bacillus subtilis (strain 168) GN=yuaG PE=4 SV=1	1524	55959	69.13	ITVVDTGGSGESSGANK
44	1::sw|O32076|YUAG_BACSU	Uncharacterized protein YuaG OS=Bacillus subtilis (strain 168) GN=yuaG PE=4 SV=1	1524	55959	56.28	IGGSIGEIATAAEQFLGK
44	1::sw|O32076|YUAG_BACSU	Uncharacterized protein YuaG OS=Bacillus subtilis (strain 168) GN=yuaG PE=4 SV=1	1524	55959	75	TAGPDEALIVTGSYLGNK
44	1::sw|O32076|YUAG_BACSU	Uncharacterized protein YuaG OS=Bacillus subtilis (strain 168) GN=yuaG PE=4 SV=1	1524	55959	85.71	VTSYATNLMSSLQESLK
44	1::sw|O32076|YUAG_BACSU	Uncharacterized protein YuaG OS=Bacillus subtilis (strain 168) GN=yuaG PE=4 SV=1	1524	55959	30.86	IAAAFEQYGQAAIFDMIVK
345	1::sw|O32082|YUBF_BACSU	Uncharacterized membrane protein YubF OS=Bacillus subtilis (strain 168) GN=yubF PE=4 SV=1	238	10005	50.93	DNAEDNEIIAEQEK
345	1::sw|O32082|YUBF_BACSU	Uncharacterized membrane protein YubF OS=Bacillus subtilis (strain 168) GN=yubF PE=4 SV=1	238	10005	60.69	DNAEDNEIIAEQEK
345	1::sw|O32082|YUBF_BACSU	Uncharacterized membrane protein YubF OS=Bacillus subtilis (strain 168) GN=yubF PE=4 SV=1	238	10005	50.66	DNAEDNEIIAEQEK
345	1::sw|O32082|YUBF_BACSU	Uncharacterized membrane protein YubF OS=Bacillus subtilis (strain 168) GN=yubF PE=4 SV=1	238	10005	58.48	DNAEDNEIIAEQEK
345	1::sw|O32082|YUBF_BACSU	Uncharacterized membrane protein YubF OS=Bacillus subtilis (strain 168) GN=yubF PE=4 SV=1	238	10005	34.45	DNAEDNEIIAEQEK
345	1::sw|O32082|YUBF_BACSU	Uncharacterized membrane protein YubF OS=Bacillus subtilis (strain 168) GN=yubF PE=4 SV=1	238	10005	50.7	DNAEDNEIIAEQEK
345	1::sw|O32082|YUBF_BACSU	Uncharacterized membrane protein YubF OS=Bacillus subtilis (strain 168) GN=yubF PE=4 SV=1	238	10005	43.97	DNAEDNEIIAEQEKR
370	1::sw|O32086|YUBA_BACSU	UPF0118 membrane protein YubA OS=Bacillus subtilis (strain 168) GN=yubA PE=3 SV=1	214	43697	24.46	KLPVYILK
370	1::sw|O32086|YUBA_BACSU	UPF0118 membrane protein YubA OS=Bacillus subtilis (strain 168) GN=yubA PE=3 SV=1	214	43697	56.13	YVDVVENQTK
370	1::sw|O32086|YUBA_BACSU	UPF0118 membrane protein YubA OS=Bacillus subtilis (strain 168) GN=yubA PE=3 SV=1	214	43697	52.21	YVDVVENQTK
370	1::sw|O32086|YUBA_BACSU	UPF0118 membrane protein YubA OS=Bacillus subtilis (strain 168) GN=yubA PE=3 SV=1	214	43697	55.02	YVDVVENQTK
370	1::sw|O32086|YUBA_BACSU	UPF0118 membrane protein YubA OS=Bacillus subtilis (strain 168) GN=yubA PE=3 SV=1	214	43697	49.02	METLQTWSGR
370	1::sw|O32086|YUBA_BACSU	UPF0118 membrane protein YubA OS=Bacillus subtilis (strain 168) GN=yubA PE=3 SV=1	214	43697	47.59	VITTHLFDWFK
370	1::sw|O32086|YUBA_BACSU	UPF0118 membrane protein YubA OS=Bacillus subtilis (strain 168) GN=yubA PE=3 SV=1	214	43697	20.91	VITTHLFDWFK
370	1::sw|O32086|YUBA_BACSU	UPF0118 membrane protein YubA OS=Bacillus subtilis (strain 168) GN=yubA PE=3 SV=1	214	43697	50.46	VITTHLFDWFK
370	1::sw|O32086|YUBA_BACSU	UPF0118 membrane protein YubA OS=Bacillus subtilis (strain 168) GN=yubA PE=3 SV=1	214	43697	29.54	VITTHLFDWFK
910	1::sw|O32087|YUZA_BACSU	Uncharacterized membrane protein YuzA OS=Bacillus subtilis (strain 168) GN=yuzA PE=4 SV=1	43	8518	23.34	EEAANPEMR	Oxidation (M)
910	1::sw|O32087|YUZA_BACSU	Uncharacterized membrane protein YuzA OS=Bacillus subtilis (strain 168) GN=yuzA PE=4 SV=1	43	8518	36.92	SREEAANPEMR
412	1::sw|O32095|YUEF_BACSU	UPF0118 membrane protein YueF OS=Bacillus subtilis (strain 168) GN=yueF PE=3 SV=1	184	40984	19.23	QIQALTK
412	1::sw|O32095|YUEF_BACSU	UPF0118 membrane protein YueF OS=Bacillus subtilis (strain 168) GN=yueF PE=3 SV=1	184	40984	62.1	AFFLNIVR
412	1::sw|O32095|YUEF_BACSU	UPF0118 membrane protein YueF OS=Bacillus subtilis (strain 168) GN=yueF PE=3 SV=1	184	40984	30.1	AFFLNIVR
412	1::sw|O32095|YUEF_BACSU	UPF0118 membrane protein YueF OS=Bacillus subtilis (strain 168) GN=yueF PE=3 SV=1	184	40984	44	AFFLNIVR
412	1::sw|O32095|YUEF_BACSU	UPF0118 membrane protein YueF OS=Bacillus subtilis (strain 168) GN=yueF PE=3 SV=1	184	40984	49.3	AFFLNIVR
[truncated: 14,124 more rows]

## Sheet: S2c
Table S2: Proteins identified in the Bacillus subtilis vegetative cell membrane fraction
c. Mascot search result details of Replicate 2
Protein hit number	Protein accession	Protein description	Protein score	Protein mass	Peptide score	Peptide sequence	Peptide variable modification
778	1::sw|C0H3X4|YEZG_BACSU	Probable antitoxin YezG OS=Bacillus subtilis (strain 168) GN=yezG PE=1 SV=1	35	18011	18.42	TLLRELR
778	1::sw|C0H3X4|YEZG_BACSU	Probable antitoxin YezG OS=Bacillus subtilis (strain 168) GN=yezG PE=1 SV=1	35	18011	23.09	LNDIIPGEWTK
778	1::sw|C0H3X4|YEZG_BACSU	Probable antitoxin YezG OS=Bacillus subtilis (strain 168) GN=yezG PE=1 SV=1	35	18011	33.33	NNNDDVWTNLTLTLDR
822	1::sw|C0H3X7|MPRF_BACSU	Phosphatidylglycerol lysyltransferase OS=Bacillus subtilis (strain 168) GN=mprF PE=1 SV=1	28	96317	27.89	GFSLGFFDPSYLQK
791	1::sw|C0H402|YKZP_BACSU	Uncharacterized protein YkzP OS=Bacillus subtilis (strain 168) GN=ykzP PE=4 SV=1	33	5796	33.02	KAEVNEAIK
791	1::sw|C0H402|YKZP_BACSU	Uncharacterized protein YkzP OS=Bacillus subtilis (strain 168) GN=ykzP PE=4 SV=1	33	5796	21.19	KAEVNEAIK
791	1::sw|C0H402|YKZP_BACSU	Uncharacterized protein YkzP OS=Bacillus subtilis (strain 168) GN=ykzP PE=4 SV=1	33	5796	25.32	KAEVNEAIK
791	1::sw|C0H402|YKZP_BACSU	Uncharacterized protein YkzP OS=Bacillus subtilis (strain 168) GN=ykzP PE=4 SV=1	33	5796	24.18	KAEVNEAIK
816	1::sw|C0H440|YOUA_BACSU	SPBc2 prophage-derived uncharacterized protein YouA OS=Bacillus subtilis (strain 168) GN=youA PE=4 SV=1	29	21699	28.55	NTAAIKTQVQK
816	1::sw|C0H440|YOUA_BACSU	SPBc2 prophage-derived uncharacterized protein YouA OS=Bacillus subtilis (strain 168) GN=youA PE=4 SV=1	29	21699	22.68	NTAAIKTQVQK
816	1::sw|C0H440|YOUA_BACSU	SPBc2 prophage-derived uncharacterized protein YouA OS=Bacillus subtilis (strain 168) GN=youA PE=4 SV=1	29	21699	23.99	NTAAIKTQVQK
647	1::sw|C0SP78|YDFM_BACSU	Uncharacterized transporter YdfM OS=Bacillus subtilis (strain 168) GN=ydfM PE=3 SV=1	60	32891	28.56	LSLDHDLTIK
647	1::sw|C0SP78|YDFM_BACSU	Uncharacterized transporter YdfM OS=Bacillus subtilis (strain 168) GN=ydfM PE=3 SV=1	60	32891	33.6	AVIFQCDQVK
647	1::sw|C0SP78|YDFM_BACSU	Uncharacterized transporter YdfM OS=Bacillus subtilis (strain 168) GN=ydfM PE=3 SV=1	60	32891	38.26	AVIFQCDQVK
344	1::sw|C0SP93|ACCD_BACSU	Acetyl-coenzyme A carboxylase carboxyl transferase subunit beta OS=Bacillus subtilis (strain 168) GN=accD PE=1 SV=1	186	32242	27.2	ITLAIEKAK
344	1::sw|C0SP93|ACCD_BACSU	Acetyl-coenzyme A carboxylase carboxyl transferase subunit beta OS=Bacillus subtilis (strain 168) GN=accD PE=1 SV=1	186	32242	24.84	YASVPSDQAK
344	1::sw|C0SP93|ACCD_BACSU	Acetyl-coenzyme A carboxylase carboxyl transferase subunit beta OS=Bacillus subtilis (strain 168) GN=accD PE=1 SV=1	186	32242	19.24	HDVPEGIMTK
344	1::sw|C0SP93|ACCD_BACSU	Acetyl-coenzyme A carboxylase carboxyl transferase subunit beta OS=Bacillus subtilis (strain 168) GN=accD PE=1 SV=1	186	32242	65.06	VPFIIFTASGGAR
344	1::sw|C0SP93|ACCD_BACSU	Acetyl-coenzyme A carboxylase carboxyl transferase subunit beta OS=Bacillus subtilis (strain 168) GN=accD PE=1 SV=1	186	32242	55.33	MQEGVLSLMQMAK
344	1::sw|C0SP93|ACCD_BACSU	Acetyl-coenzyme A carboxylase carboxyl transferase subunit beta OS=Bacillus subtilis (strain 168) GN=accD PE=1 SV=1	186	32242	48.86	LPEDFQTAEFLLK
344	1::sw|C0SP93|ACCD_BACSU	Acetyl-coenzyme A carboxylase carboxyl transferase subunit beta OS=Bacillus subtilis (strain 168) GN=accD PE=1 SV=1	186	32242	51.03	LPEDFQTAEFLLK
344	1::sw|C0SP93|ACCD_BACSU	Acetyl-coenzyme A carboxylase carboxyl transferase subunit beta OS=Bacillus subtilis (strain 168) GN=accD PE=1 SV=1	186	32242	52.2	LPEDFQTAEFLLK
166	1::sw|C0SP94|YHFQ_BACSU	Putative ABC transporter substrate-binding lipoprotein YhfQ OS=Bacillus subtilis (strain 168) GN=yhfQ PE=1 SV=1	480	35524	20.27	VYDQLKK
166	1::sw|C0SP94|YHFQ_BACSU	Putative ABC transporter substrate-binding lipoprotein YhfQ OS=Bacillus subtilis (strain 168) GN=yhfQ PE=1 SV=1	480	35524	55.44	VAVTHDLGK
166	1::sw|C0SP94|YHFQ_BACSU	Putative ABC transporter substrate-binding lipoprotein YhfQ OS=Bacillus subtilis (strain 168) GN=yhfQ PE=1 SV=1	480	35524	40.28	LLTQVGYR
166	1::sw|C0SP94|YHFQ_BACSU	Putative ABC transporter substrate-binding lipoprotein YhfQ OS=Bacillus subtilis (strain 168) GN=yhfQ PE=1 SV=1	480	35524	30.85	LLTQVGYR
166	1::sw|C0SP94|YHFQ_BACSU	Putative ABC transporter substrate-binding lipoprotein YhfQ OS=Bacillus subtilis (strain 168) GN=yhfQ PE=1 SV=1	480	35524	33.21	LLTQVGYR
166	1::sw|C0SP94|YHFQ_BACSU	Putative ABC transporter substrate-binding lipoprotein YhfQ OS=Bacillus subtilis (strain 168) GN=yhfQ PE=1 SV=1	480	35524	52.67	MTLEQLLK
166	1::sw|C0SP94|YHFQ_BACSU	Putative ABC transporter substrate-binding lipoprotein YhfQ OS=Bacillus subtilis (strain 168) GN=yhfQ PE=1 SV=1	480	35524	34.66	DENFFTSR
166	1::sw|C0SP94|YHFQ_BACSU	Putative ABC transporter substrate-binding lipoprotein YhfQ OS=Bacillus subtilis (strain 168) GN=yhfQ PE=1 SV=1	480	35524	24.28	NGHVYHVDR
166	1::sw|C0SP94|YHFQ_BACSU	Putative ABC transporter substrate-binding lipoprotein YhfQ OS=Bacillus subtilis (strain 168) GN=yhfQ PE=1 SV=1	480	35524	83.06	TDPDVIILMTGK
166	1::sw|C0SP94|YHFQ_BACSU	Putative ABC transporter substrate-binding lipoprotein YhfQ OS=Bacillus subtilis (strain 168) GN=yhfQ PE=1 SV=1	480	35524	96.96	TDPDVIILMTGK
166	1::sw|C0SP94|YHFQ_BACSU	Putative ABC transporter substrate-binding lipoprotein YhfQ OS=Bacillus subtilis (strain 168) GN=yhfQ PE=1 SV=1	480	35524	113.6	SVDGANAILDELQK
166	1::sw|C0SP94|YHFQ_BACSU	Putative ABC transporter substrate-binding lipoprotein YhfQ OS=Bacillus subtilis (strain 168) GN=yhfQ PE=1 SV=1	480	35524	105.21	SVDGANAILDELQK
166	1::sw|C0SP94|YHFQ_BACSU	Putative ABC transporter substrate-binding lipoprotein YhfQ OS=Bacillus subtilis (strain 168) GN=yhfQ PE=1 SV=1	480	35524	71.88	IASLKPDLIIADTTR
233	1::sw|C0SP98|YKFD_BACSU	Putative oligopeptide transport ATP-binding protein YkfD OS=Bacillus subtilis (strain 168) GN=ykfD PE=3 SV=1	321	37546	21.92	QRIGIAR
233	1::sw|C0SP98|YKFD_BACSU	Putative oligopeptide transport ATP-binding protein YkfD OS=Bacillus subtilis (strain 168) GN=ykfD PE=3 SV=1	321	37546	18.43	EQFAFNR
233	1::sw|C0SP98|YKFD_BACSU	Putative oligopeptide transport ATP-binding protein YkfD OS=Bacillus subtilis (strain 168) GN=ykfD PE=3 SV=1	321	37546	43.47	FVACHLYR
233	1::sw|C0SP98|YKFD_BACSU	Putative oligopeptide transport ATP-binding protein YkfD OS=Bacillus subtilis (strain 168) GN=ykfD PE=3 SV=1	321	37546	54.61	GTNLHALSEK
233	1::sw|C0SP98|YKFD_BACSU	Putative oligopeptide transport ATP-binding protein YkfD OS=Bacillus subtilis (strain 168) GN=ykfD PE=3 SV=1	321	37546	44.3	AVDGVTFQIR
233	1::sw|C0SP98|YKFD_BACSU	Putative oligopeptide transport ATP-binding protein YkfD OS=Bacillus subtilis (strain 168) GN=ykfD PE=3 SV=1	321	37546	42.8	LPLLEVSQLK
233	1::sw|C0SP98|YKFD_BACSU	Putative oligopeptide transport ATP-binding protein YkfD OS=Bacillus subtilis (strain 168) GN=ykfD PE=3 SV=1	321	37546	62.91	LYQPTEGSVTYR
233	1::sw|C0SP98|YKFD_BACSU	Putative oligopeptide transport ATP-binding protein YkfD OS=Bacillus subtilis (strain 168) GN=ykfD PE=3 SV=1	321	37546	28.7	LYQPTEGSVTYR
233	1::sw|C0SP98|YKFD_BACSU	Putative oligopeptide transport ATP-binding protein YkfD OS=Bacillus subtilis (strain 168) GN=ykfD PE=3 SV=1	321	37546	63.2	LYQPTEGSVTYR
233	1::sw|C0SP98|YKFD_BACSU	Putative oligopeptide transport ATP-binding protein YkfD OS=Bacillus subtilis (strain 168) GN=ykfD PE=3 SV=1	321	37546	45.58	EGETFGLVGESGCGK
233	1::sw|C0SP98|YKFD_BACSU	Putative oligopeptide transport ATP-binding protein YkfD OS=Bacillus subtilis (strain 168) GN=ykfD PE=3 SV=1	321	37546	24.84	LLVVDELLEAVGLHPDFGSR
233	1::sw|C0SP98|YKFD_BACSU	Putative oligopeptide transport ATP-binding protein YkfD OS=Bacillus subtilis (strain 168) GN=ykfD PE=3 SV=1	321	37546	105.03	LLVVDELLEAVGLHPDFGSR
792	1::sw|C0SPA7|YUKB_BACSU	Ftsk domain-containing protein YukB OS=Bacillus subtilis (strain 168) GN=yukB PE=4 SV=1	33	171971	19.07	ALASIKSELK
792	1::sw|C0SPA7|YUKB_BACSU	Ftsk domain-containing protein YukB OS=Bacillus subtilis (strain 168) GN=yukB PE=4 SV=1	33	171971	32.53	ESLSENITTLVR
359	1::sw|C0SPB0|YTCI_BACSU	Uncharacterized acyl--CoA ligase YtcI OS=Bacillus subtilis (strain 168) GN=ytcI PE=3 SV=1	169	59573	18.19	REEQLK
359	1::sw|C0SPB0|YTCI_BACSU	Uncharacterized acyl--CoA ligase YtcI OS=Bacillus subtilis (strain 168) GN=ytcI PE=3 SV=1	169	59573	20.91	REEQLK
359	1::sw|C0SPB0|YTCI_BACSU	Uncharacterized acyl--CoA ligase YtcI OS=Bacillus subtilis (strain 168) GN=ytcI PE=3 SV=1	169	59573	79.14	NLLSIEADGSQFK
359	1::sw|C0SPB0|YTCI_BACSU	Uncharacterized acyl--CoA ligase YtcI OS=Bacillus subtilis (strain 168) GN=ytcI PE=3 SV=1	169	59573	74.62	LITLSIGENDAGWK
359	1::sw|C0SPB0|YTCI_BACSU	Uncharacterized acyl--CoA ligase YtcI OS=Bacillus subtilis (strain 168) GN=ytcI PE=3 SV=1	169	59573	60.81	DGYGQTESTLLVGVLK
518	1::sw|C0SPB4|YHAQ_BACSU	Uncharacterized ABC transporter ATP-binding protein YhaQ OS=Bacillus subtilis (strain 168) GN=yhaQ PE=3 SV=1	96	33951	44.99	IGYLPEER
518	1::sw|C0SPB4|YHAQ_BACSU	Uncharacterized ABC transporter ATP-binding protein YhaQ OS=Bacillus subtilis (strain 168) GN=yhaQ PE=3 SV=1	96	33951	19.44	IGYLPEER
518	1::sw|C0SPB4|YHAQ_BACSU	Uncharacterized ABC transporter ATP-binding protein YhaQ OS=Bacillus subtilis (strain 168) GN=yhaQ PE=3 SV=1	96	33951	31.57	ELGTWLER
518	1::sw|C0SPB4|YHAQ_BACSU	Uncharacterized ABC transporter ATP-binding protein YhaQ OS=Bacillus subtilis (strain 168) GN=yhaQ PE=3 SV=1	96	33951	50.66	FNITDYENK
518	1::sw|C0SPB4|YHAQ_BACSU	Uncharacterized ABC transporter ATP-binding protein YhaQ OS=Bacillus subtilis (strain 168) GN=yhaQ PE=3 SV=1	96	33951	28.23	VRDQLVYLAR
518	1::sw|C0SPB4|YHAQ_BACSU	Uncharacterized ABC transporter ATP-binding protein YhaQ OS=Bacillus subtilis (strain 168) GN=yhaQ PE=3 SV=1	96	33951	32.88	NVTIHSDDDLR
518	1::sw|C0SPB4|YHAQ_BACSU	Uncharacterized ABC transporter ATP-binding protein YhaQ OS=Bacillus subtilis (strain 168) GN=yhaQ PE=3 SV=1	96	33951	22.48	GRPVNYHISNK
790	1::sw|O05227|MRPG_BACSU	Na(+)/H(+) antiporter subunit G OS=Bacillus subtilis (strain 168) GN=mrpG PE=1 SV=1	33	13731	33.06	SVQDDYNGIR
749	1::sw|O05236|YUGG_BACSU	Uncharacterized HTH-type transcriptional regulator YugG OS=Bacillus subtilis (strain 168) GN=yugG PE=4 SV=2	41	18749	40.53	VFETGDDDKR
696	1::sw|O05248|YUGP_BACSU	Putative membrane protease YugP OS=Bacillus subtilis (strain 168) GN=yugP PE=4 SV=1	49	24679	37.74	LSEPVYYGR
696	1::sw|O05248|YUGP_BACSU	Putative membrane protease YugP OS=Bacillus subtilis (strain 168) GN=yugP PE=4 SV=1	49	24679	35.53	QIIVSEGFIR
37	1::sw|O05252|YUFN_BACSU	Uncharacterized lipoprotein YufN OS=Bacillus subtilis (strain 168) GN=yufN PE=3 SV=2	2318	38395	53.2	AGVQAVNPK
37	1::sw|O05252|YUFN_BACSU	Uncharacterized lipoprotein YufN OS=Bacillus subtilis (strain 168) GN=yufN PE=3 SV=2	2318	38395	58.18	AGVQAVNPK
37	1::sw|O05252|YUFN_BACSU	Uncharacterized lipoprotein YufN OS=Bacillus subtilis (strain 168) GN=yufN PE=3 SV=2	2318	38395	19.05	QNLSDDVIK
37	1::sw|O05252|YUFN_BACSU	Uncharacterized lipoprotein YufN OS=Bacillus subtilis (strain 168) GN=yufN PE=3 SV=2	2318	38395	66.86	KVDTVVEDVTK
37	1::sw|O05252|YUFN_BACSU	Uncharacterized lipoprotein YufN OS=Bacillus subtilis (strain 168) GN=yufN PE=3 SV=2	2318	38395	65.49	KVDTVVEDVTK
37	1::sw|O05252|YUFN_BACSU	Uncharacterized lipoprotein YufN OS=Bacillus subtilis (strain 168) GN=yufN PE=3 SV=2	2318	38395	62.18	KVDTVVEDVTK
37	1::sw|O05252|YUFN_BACSU	Uncharacterized lipoprotein YufN OS=Bacillus subtilis (strain 168) GN=yufN PE=3 SV=2	2318	38395	80.75	KVDTVVEDVTK
37	1::sw|O05252|YUFN_BACSU	Uncharacterized lipoprotein YufN OS=Bacillus subtilis (strain 168) GN=yufN PE=3 SV=2	2318	38395	76.27	KVDTVVEDVTK
37	1::sw|O05252|YUFN_BACSU	Uncharacterized lipoprotein YufN OS=Bacillus subtilis (strain 168) GN=yufN PE=3 SV=2	2318	38395	81.28	KVDTVVEDVTK
37	1::sw|O05252|YUFN_BACSU	Uncharacterized lipoprotein YufN OS=Bacillus subtilis (strain 168) GN=yufN PE=3 SV=2	2318	38395	79.03	SDADYTTNLNK
37	1::sw|O05252|YUFN_BACSU	Uncharacterized lipoprotein YufN OS=Bacillus subtilis (strain 168) GN=yufN PE=3 SV=2	2318	38395	87.39	SDADYTTNLNK
37	1::sw|O05252|YUFN_BACSU	Uncharacterized lipoprotein YufN OS=Bacillus subtilis (strain 168) GN=yufN PE=3 SV=2	2318	38395	80.08	SDADYTTNLNK
37	1::sw|O05252|YUFN_BACSU	Uncharacterized lipoprotein YufN OS=Bacillus subtilis (strain 168) GN=yufN PE=3 SV=2	2318	38395	99.36	IIDGLEIPATEK
37	1::sw|O05252|YUFN_BACSU	Uncharacterized lipoprotein YufN OS=Bacillus subtilis (strain 168) GN=yufN PE=3 SV=2	2318	38395	64.16	IIDGLEIPATEK
37	1::sw|O05252|YUFN_BACSU	Uncharacterized lipoprotein YufN OS=Bacillus subtilis (strain 168) GN=yufN PE=3 SV=2	2318	38395	25.49	IIDGLEIPATEK
37	1::sw|O05252|YUFN_BACSU	Uncharacterized lipoprotein YufN OS=Bacillus subtilis (strain 168) GN=yufN PE=3 SV=2	2318	38395	47.59	IGFVGGMESELIK
37	1::sw|O05252|YUFN_BACSU	Uncharacterized lipoprotein YufN OS=Bacillus subtilis (strain 168) GN=yufN PE=3 SV=2	2318	38395	55.54	IGFVGGMESELIK
37	1::sw|O05252|YUFN_BACSU	Uncharacterized lipoprotein YufN OS=Bacillus subtilis (strain 168) GN=yufN PE=3 SV=2	2318	38395	75.84	IGFVGGMESELIK
37	1::sw|O05252|YUFN_BACSU	Uncharacterized lipoprotein YufN OS=Bacillus subtilis (strain 168) GN=yufN PE=3 SV=2	2318	38395	66.88	IGFVGGMESELIK
37	1::sw|O05252|YUFN_BACSU	Uncharacterized lipoprotein YufN OS=Bacillus subtilis (strain 168) GN=yufN PE=3 SV=2	2318	38395	53.7	IGFVGGMESELIK
37	1::sw|O05252|YUFN_BACSU	Uncharacterized lipoprotein YufN OS=Bacillus subtilis (strain 168) GN=yufN PE=3 SV=2	2318	38395	32.48	IGFVGGMESELIK
37	1::sw|O05252|YUFN_BACSU	Uncharacterized lipoprotein YufN OS=Bacillus subtilis (strain 168) GN=yufN PE=3 SV=2	2318	38395	77.12	IGFVGGMESELIK	Oxidation (M)
37	1::sw|O05252|YUFN_BACSU	Uncharacterized lipoprotein YufN OS=Bacillus subtilis (strain 168) GN=yufN PE=3 SV=2	2318	38395	82.42	IGFVGGMESELIK	Oxidation (M)
37	1::sw|O05252|YUFN_BACSU	Uncharacterized lipoprotein YufN OS=Bacillus subtilis (strain 168) GN=yufN PE=3 SV=2	2318	38395	105.28	NTNFAIIDAVVDK
37	1::sw|O05252|YUFN_BACSU	Uncharacterized lipoprotein YufN OS=Bacillus subtilis (strain 168) GN=yufN PE=3 SV=2	2318	38395	81.07	KIIDGLEIPATEK
37	1::sw|O05252|YUFN_BACSU	Uncharacterized lipoprotein YufN OS=Bacillus subtilis (strain 168) GN=yufN PE=3 SV=2	2318	38395	74.14	FSVAMVTDVGGVDDK
37	1::sw|O05252|YUFN_BACSU	Uncharacterized lipoprotein YufN OS=Bacillus subtilis (strain 168) GN=yufN PE=3 SV=2	2318	38395	64.52	FSVAMVTDVGGVDDK
37	1::sw|O05252|YUFN_BACSU	Uncharacterized lipoprotein YufN OS=Bacillus subtilis (strain 168) GN=yufN PE=3 SV=2	2318	38395	77.35	FSVAMVTDVGGVDDK
37	1::sw|O05252|YUFN_BACSU	Uncharacterized lipoprotein YufN OS=Bacillus subtilis (strain 168) GN=yufN PE=3 SV=2	2318	38395	60.89	FSVAMVTDVGGVDDK
37	1::sw|O05252|YUFN_BACSU	Uncharacterized lipoprotein YufN OS=Bacillus subtilis (strain 168) GN=yufN PE=3 SV=2	2318	38395	95.11	FSVAMVTDVGGVDDK	Oxidation (M)
37	1::sw|O05252|YUFN_BACSU	Uncharacterized lipoprotein YufN OS=Bacillus subtilis (strain 168) GN=yufN PE=3 SV=2	2318	38395	111.4	FSVAMVTDVGGVDDK	Oxidation (M)
37	1::sw|O05252|YUFN_BACSU	Uncharacterized lipoprotein YufN OS=Bacillus subtilis (strain 168) GN=yufN PE=3 SV=2	2318	38395	99.95	FSVAMVTDVGGVDDK	Oxidation (M)
37	1::sw|O05252|YUFN_BACSU	Uncharacterized lipoprotein YufN OS=Bacillus subtilis (strain 168) GN=yufN PE=3 SV=2	2318	38395	60.13	SFNQSAWEGIQAFGK
37	1::sw|O05252|YUFN_BACSU	Uncharacterized lipoprotein YufN OS=Bacillus subtilis (strain 168) GN=yufN PE=3 SV=2	2318	38395	63.46	SFNQSAWEGIQAFGK
37	1::sw|O05252|YUFN_BACSU	Uncharacterized lipoprotein YufN OS=Bacillus subtilis (strain 168) GN=yufN PE=3 SV=2	2318	38395	57.99	SFNQSAWEGIQAFGK
37	1::sw|O05252|YUFN_BACSU	Uncharacterized lipoprotein YufN OS=Bacillus subtilis (strain 168) GN=yufN PE=3 SV=2	2318	38395	40.31	SFNQSAWEGIQAFGK
37	1::sw|O05252|YUFN_BACSU	Uncharacterized lipoprotein YufN OS=Bacillus subtilis (strain 168) GN=yufN PE=3 SV=2	2318	38395	65.86	SFNQSAWEGIQAFGK
37	1::sw|O05252|YUFN_BACSU	Uncharacterized lipoprotein YufN OS=Bacillus subtilis (strain 168) GN=yufN PE=3 SV=2	2318	38395	62.48	SFNQSAWEGIQAFGK
37	1::sw|O05252|YUFN_BACSU	Uncharacterized lipoprotein YufN OS=Bacillus subtilis (strain 168) GN=yufN PE=3 SV=2	2318	38395	84.86	EQEGSFLVGVAAALSSK
37	1::sw|O05252|YUFN_BACSU	Uncharacterized lipoprotein YufN OS=Bacillus subtilis (strain 168) GN=yufN PE=3 SV=2	2318	38395	85.35	EQEGSFLVGVAAALSSK
37	1::sw|O05252|YUFN_BACSU	Uncharacterized lipoprotein YufN OS=Bacillus subtilis (strain 168) GN=yufN PE=3 SV=2	2318	38395	79.43	EQEGSFLVGVAAALSSK
37	1::sw|O05252|YUFN_BACSU	Uncharacterized lipoprotein YufN OS=Bacillus subtilis (strain 168) GN=yufN PE=3 SV=2	2318	38395	75.59	EQEGSFLVGVAAALSSK
37	1::sw|O05252|YUFN_BACSU	Uncharacterized lipoprotein YufN OS=Bacillus subtilis (strain 168) GN=yufN PE=3 SV=2	2318	38395	68.91	EQEGSFLVGVAAALSSK
37	1::sw|O05252|YUFN_BACSU	Uncharacterized lipoprotein YufN OS=Bacillus subtilis (strain 168) GN=yufN PE=3 SV=2	2318	38395	81.81	SGVDVIYHSAGATGTGVFTEAK
37	1::sw|O05252|YUFN_BACSU	Uncharacterized lipoprotein YufN OS=Bacillus subtilis (strain 168) GN=yufN PE=3 SV=2	2318	38395	64.64	SGVDVIYHSAGATGTGVFTEAK
37	1::sw|O05252|YUFN_BACSU	Uncharacterized lipoprotein YufN OS=Bacillus subtilis (strain 168) GN=yufN PE=3 SV=2	2318	38395	48.17	SGVDVIYHSAGATGTGVFTEAK
37	1::sw|O05252|YUFN_BACSU	Uncharacterized lipoprotein YufN OS=Bacillus subtilis (strain 168) GN=yufN PE=3 SV=2	2318	38395	62.99	FPGGETLTYGLDQDGVGISPSK
37	1::sw|O05252|YUFN_BACSU	Uncharacterized lipoprotein YufN OS=Bacillus subtilis (strain 168) GN=yufN PE=3 SV=2	2318	38395	73.77	FPGGETLTYGLDQDGVGISPSK
37	1::sw|O05252|YUFN_BACSU	Uncharacterized lipoprotein YufN OS=Bacillus subtilis (strain 168) GN=yufN PE=3 SV=2	2318	38395	90.31	NTNFAIIDAVVDKDNVASITFK
336	1::sw|O05253|YUFO_BACSU	Uncharacterized ABC transporter ATP-binding protein YufO OS=Bacillus subtilis (strain 168) GN=yufO PE=3 SV=1	193	56322	28.75	ELMQIMK	Oxidation (M)
336	1::sw|O05253|YUFO_BACSU	Uncharacterized ABC transporter ATP-binding protein YufO OS=Bacillus subtilis (strain 168) GN=yufO PE=3 SV=1	193	56322	19.81	ELMQIMK	Oxidation (M)
336	1::sw|O05253|YUFO_BACSU	Uncharacterized ABC transporter ATP-binding protein YufO OS=Bacillus subtilis (strain 168) GN=yufO PE=3 SV=1	193	56322	54.86	TPDEYTHAR
336	1::sw|O05253|YUFO_BACSU	Uncharacterized ABC transporter ATP-binding protein YufO OS=Bacillus subtilis (strain 168) GN=yufO PE=3 SV=1	193	56322	39.64	AGQEVQDISDR
336	1::sw|O05253|YUFO_BACSU	Uncharacterized ABC transporter ATP-binding protein YufO OS=Bacillus subtilis (strain 168) GN=yufO PE=3 SV=1	193	56322	27.06	AGQEVQDISDR
336	1::sw|O05253|YUFO_BACSU	Uncharacterized ABC transporter ATP-binding protein YufO OS=Bacillus subtilis (strain 168) GN=yufO PE=3 SV=1	193	56322	45.91	GLDVGAIEFVHK
336	1::sw|O05253|YUFO_BACSU	Uncharacterized ABC transporter ATP-binding protein YufO OS=Bacillus subtilis (strain 168) GN=yufO PE=3 SV=1	193	56322	85.85	MEYVIEMLNIR
336	1::sw|O05253|YUFO_BACSU	Uncharacterized ABC transporter ATP-binding protein YufO OS=Bacillus subtilis (strain 168) GN=yufO PE=3 SV=1	193	56322	27.46	DTNQDELASLMVGR
336	1::sw|O05253|YUFO_BACSU	Uncharacterized ABC transporter ATP-binding protein YufO OS=Bacillus subtilis (strain 168) GN=yufO PE=3 SV=1	193	56322	32.06	AAQPGAEVLAIDGITVK
336	1::sw|O05253|YUFO_BACSU	Uncharacterized ABC transporter ATP-binding protein YufO OS=Bacillus subtilis (strain 168) GN=yufO PE=3 SV=1	193	56322	27.87	EIDRNPDLLIAAQPTR
567	1::sw|O05254|YUFP_BACSU	Uncharacterized ABC transporter permease protein YufP OS=Bacillus subtilis (strain 168) GN=yufP PE=3 SV=1	82	36877	28.26	IHESASLR
567	1::sw|O05254|YUFP_BACSU	Uncharacterized ABC transporter permease protein YufP OS=Bacillus subtilis (strain 168) GN=yufP PE=3 SV=1	82	36877	77.16	SPFLEQITDYSR
556	1::sw|O05255|YUFQ_BACSU	Uncharacterized ABC transporter permease protein YufQ OS=Bacillus subtilis (strain 168) GN=yufQ PE=3 SV=1	86	33716	76.25	IPGLGDIPVLGK
556	1::sw|O05255|YUFQ_BACSU	Uncharacterized ABC transporter permease protein YufQ OS=Bacillus subtilis (strain 168) GN=yufQ PE=3 SV=1	86	33716	24.07	TKIPGLGDIPVLGK
556	1::sw|O05255|YUFQ_BACSU	Uncharacterized ABC transporter permease protein YufQ OS=Bacillus subtilis (strain 168) GN=yufQ PE=3 SV=1	86	33716	24.02	AQTDKIPEPFYK
803	1::sw|O05260|MRPC_BACSU	Na(+)/H(+) antiporter subunit C OS=Bacillus subtilis (strain 168) GN=mrpC PE=1 SV=2	31	12277	30.98	GAAPILSEHAK
701	1::sw|O05267|YUMB_BACSU	NADH dehydrogenase-like protein YumB OS=Bacillus subtilis (strain 168) GN=yumB PE=3 SV=1	48	45133	18.93	GGELEEFKPDIK
701	1::sw|O05267|YUMB_BACSU	NADH dehydrogenase-like protein YumB OS=Bacillus subtilis (strain 168) GN=yumB PE=3 SV=1	48	45133	48.16	EYAFPIANINTSR
859	1::sw|O05389|YRBE_BACSU	Uncharacterized oxidoreductase YrbE OS=Bacillus subtilis (strain 168) GN=yrbE PE=3 SV=2	22	37935	22.25	PHFFFLERYK
206	1::sw|O05503|YDHK_BACSU	Uncharacterized protein YdhK OS=Bacillus subtilis (strain 168) GN=ydhK PE=1 SV=1	368	22579	23.73	WVIQEEIK
206	1::sw|O05503|YDHK_BACSU	Uncharacterized protein YdhK OS=Bacillus subtilis (strain 168) GN=ydhK PE=1 SV=1	368	22579	40.39	WVIQEEIK
206	1::sw|O05503|YDHK_BACSU	Uncharacterized protein YdhK OS=Bacillus subtilis (strain 168) GN=ydhK PE=1 SV=1	368	22579	51.33	GATAEIDSAEK
206	1::sw|O05503|YDHK_BACSU	Uncharacterized protein YdhK OS=Bacillus subtilis (strain 168) GN=ydhK PE=1 SV=1	368	22579	56.05	GATAEIDSAEK
206	1::sw|O05503|YDHK_BACSU	Uncharacterized protein YdhK OS=Bacillus subtilis (strain 168) GN=ydhK PE=1 SV=1	368	22579	42.91	WVTEDELSAK
206	1::sw|O05503|YDHK_BACSU	Uncharacterized protein YdhK OS=Bacillus subtilis (strain 168) GN=ydhK PE=1 SV=1	368	22579	44.63	WVTEDELSAK
206	1::sw|O05503|YDHK_BACSU	Uncharacterized protein YdhK OS=Bacillus subtilis (strain 168) GN=ydhK PE=1 SV=1	368	22579	35.76	WVTEDELSAK
206	1::sw|O05503|YDHK_BACSU	Uncharacterized protein YdhK OS=Bacillus subtilis (strain 168) GN=ydhK PE=1 SV=1	368	22579	37.95	VGSQVIINTSHMK
206	1::sw|O05503|YDHK_BACSU	Uncharacterized protein YdhK OS=Bacillus subtilis (strain 168) GN=ydhK PE=1 SV=1	368	22579	59.69	VGSQVIINTSHMK
206	1::sw|O05503|YDHK_BACSU	Uncharacterized protein YdhK OS=Bacillus subtilis (strain 168) GN=ydhK PE=1 SV=1	368	22579	59.36	VGSQVIINTSHMK
206	1::sw|O05503|YDHK_BACSU	Uncharacterized protein YdhK OS=Bacillus subtilis (strain 168) GN=ydhK PE=1 SV=1	368	22579	68.35	VGSQVIINTSHMK
206	1::sw|O05503|YDHK_BACSU	Uncharacterized protein YdhK OS=Bacillus subtilis (strain 168) GN=ydhK PE=1 SV=1	368	22579	21.86	WVIQEEIKDAGDK
206	1::sw|O05503|YDHK_BACSU	Uncharacterized protein YdhK OS=Bacillus subtilis (strain 168) GN=ydhK PE=1 SV=1	368	22579	59.64	WVIQEEIKDAGDK
206	1::sw|O05503|YDHK_BACSU	Uncharacterized protein YdhK OS=Bacillus subtilis (strain 168) GN=ydhK PE=1 SV=1	368	22579	54.33	TLQPGDQVILEASHMK
865	1::sw|O05516|TSAB_BACSU	tRNA threonylcarbamoyladenosine biosynthesis protein TsaB OS=Bacillus subtilis (strain 168) GN=tsaB PE=1 SV=1	21	25284	21.32	HFDGLISPIFDAR
521	1::sw|O06477|YFMS_BACSU	Putative sensory transducer protein YfmS OS=Bacillus subtilis (strain 168) GN=yfmS PE=2 SV=1	96	30306	25.76	KIHSLLK
521	1::sw|O06477|YFMS_BACSU	Putative sensory transducer protein YfmS OS=Bacillus subtilis (strain 168) GN=yfmS PE=2 SV=1	96	30306	27.74	KIHSLLK
521	1::sw|O06477|YFMS_BACSU	Putative sensory transducer protein YfmS OS=Bacillus subtilis (strain 168) GN=yfmS PE=2 SV=1	96	30306	27.17	KIHSLLK
521	1::sw|O06477|YFMS_BACSU	Putative sensory transducer protein YfmS OS=Bacillus subtilis (strain 168) GN=yfmS PE=2 SV=1	96	30306	53.02	GFSVVADEIR
521	1::sw|O06477|YFMS_BACSU	Putative sensory transducer protein YfmS OS=Bacillus subtilis (strain 168) GN=yfmS PE=2 SV=1	96	30306	30.44	GFSVVADEIRK
521	1::sw|O06477|YFMS_BACSU	Putative sensory transducer protein YfmS OS=Bacillus subtilis (strain 168) GN=yfmS PE=2 SV=1	96	30306	24.39	GFSVVADEIRK
521	1::sw|O06477|YFMS_BACSU	Putative sensory transducer protein YfmS OS=Bacillus subtilis (strain 168) GN=yfmS PE=2 SV=1	96	30306	26.2	GFSVVADEIRK
521	1::sw|O06477|YFMS_BACSU	Putative sensory transducer protein YfmS OS=Bacillus subtilis (strain 168) GN=yfmS PE=2 SV=1	96	30306	38.24	VIGGVGLGTSLEESSK
244	1::sw|O06478|ALDH5_BACSU	Putative aldehyde dehydrogenase YfmT OS=Bacillus subtilis (strain 168) GN=yfmT PE=2 SV=1	305	53402	28.54	EAATFPIR
244	1::sw|O06478|ALDH5_BACSU	Putative aldehyde dehydrogenase YfmT OS=Bacillus subtilis (strain 168) GN=yfmT PE=2 SV=1	305	53402	52.33	AAFEIGLVK
244	1::sw|O06478|ALDH5_BACSU	Putative aldehyde dehydrogenase YfmT OS=Bacillus subtilis (strain 168) GN=yfmT PE=2 SV=1	305	53402	20.82	FLELYQAK
244	1::sw|O06478|ALDH5_BACSU	Putative aldehyde dehydrogenase YfmT OS=Bacillus subtilis (strain 168) GN=yfmT PE=2 SV=1	305	53402	21.03	WDAVNPFEK
244	1::sw|O06478|ALDH5_BACSU	Putative aldehyde dehydrogenase YfmT OS=Bacillus subtilis (strain 168) GN=yfmT PE=2 SV=1	305	53402	44.76	VLVHSSIYDK
244	1::sw|O06478|ALDH5_BACSU	Putative aldehyde dehydrogenase YfmT OS=Bacillus subtilis (strain 168) GN=yfmT PE=2 SV=1	305	53402	63.98	VGSYIGQLAMK
244	1::sw|O06478|ALDH5_BACSU	Putative aldehyde dehydrogenase YfmT OS=Bacillus subtilis (strain 168) GN=yfmT PE=2 SV=1	305	53402	62.55	KATADDVDEAYR
244	1::sw|O06478|ALDH5_BACSU	Putative aldehyde dehydrogenase YfmT OS=Bacillus subtilis (strain 168) GN=yfmT PE=2 SV=1	305	53402	33.22	EELFGPVVSFMK
244	1::sw|O06478|ALDH5_BACSU	Putative aldehyde dehydrogenase YfmT OS=Bacillus subtilis (strain 168) GN=yfmT PE=2 SV=1	305	53402	64.55	TVEQAIEEGAVPVK
244	1::sw|O06478|ALDH5_BACSU	Putative aldehyde dehydrogenase YfmT OS=Bacillus subtilis (strain 168) GN=yfmT PE=2 SV=1	305	53402	65.45	TVEQAIEEGAVPVK
244	1::sw|O06478|ALDH5_BACSU	Putative aldehyde dehydrogenase YfmT OS=Bacillus subtilis (strain 168) GN=yfmT PE=2 SV=1	305	53402	53.46	WQEGSSPNVLENK
244	1::sw|O06478|ALDH5_BACSU	Putative aldehyde dehydrogenase YfmT OS=Bacillus subtilis (strain 168) GN=yfmT PE=2 SV=1	305	53402	38.67	VGDPMDPDTIIGPLINSR
192	1::sw|O06491|GATA_BACSU	Glutamyl-tRNA(Gln) amidotransferase subunit A OS=Bacillus subtilis (strain 168) GN=gatA PE=3 SV=3	400	52802	30.39	EYLGEGVGK
192	1::sw|O06491|GATA_BACSU	Glutamyl-tRNA(Gln) amidotransferase subunit A OS=Bacillus subtilis (strain 168) GN=gatA PE=3 SV=3	400	52802	41.64	ELDEAVDGR
192	1::sw|O06491|GATA_BACSU	Glutamyl-tRNA(Gln) amidotransferase subunit A OS=Bacillus subtilis (strain 168) GN=gatA PE=3 SV=3	400	52802	61.31	LQDAEAVTIGK
192	1::sw|O06491|GATA_BACSU	Glutamyl-tRNA(Gln) amidotransferase subunit A OS=Bacillus subtilis (strain 168) GN=gatA PE=3 SV=3	400	52802	35.89	HFDESTVYR
192	1::sw|O06491|GATA_BACSU	Glutamyl-tRNA(Gln) amidotransferase subunit A OS=Bacillus subtilis (strain 168) GN=gatA PE=3 SV=3	400	52802	55.02	VQAFLALDEER
192	1::sw|O06491|GATA_BACSU	Glutamyl-tRNA(Gln) amidotransferase subunit A OS=Bacillus subtilis (strain 168) GN=gatA PE=3 SV=3	400	52802	42.45	YDVIVGPTTPTPAFK
192	1::sw|O06491|GATA_BACSU	Glutamyl-tRNA(Gln) amidotransferase subunit A OS=Bacillus subtilis (strain 168) GN=gatA PE=3 SV=3	400	52802	25.63	TVEDNAFLLQAISGVDK
192	1::sw|O06491|GATA_BACSU	Glutamyl-tRNA(Gln) amidotransferase subunit A OS=Bacillus subtilis (strain 168) GN=gatA PE=3 SV=3	400	52802	62.6	TVEDNAFLLQAISGVDK
192	1::sw|O06491|GATA_BACSU	Glutamyl-tRNA(Gln) amidotransferase subunit A OS=Bacillus subtilis (strain 168) GN=gatA PE=3 SV=3	400	52802	62.45	TVEDNAFLLQAISGVDK
192	1::sw|O06491|GATA_BACSU	Glutamyl-tRNA(Gln) amidotransferase subunit A OS=Bacillus subtilis (strain 168) GN=gatA PE=3 SV=3	400	52802	82.03	TVEDNAFLLQAISGVDK
192	1::sw|O06491|GATA_BACSU	Glutamyl-tRNA(Gln) amidotransferase subunit A OS=Bacillus subtilis (strain 168) GN=gatA PE=3 SV=3	400	52802	47.29	ILENFDPIYDATVVQR
192	1::sw|O06491|GATA_BACSU	Glutamyl-tRNA(Gln) amidotransferase subunit A OS=Bacillus subtilis (strain 168) GN=gatA PE=3 SV=3	400	52802	62.19	YGLVAFASSLDQIGPITR
192	1::sw|O06491|GATA_BACSU	Glutamyl-tRNA(Gln) amidotransferase subunit A OS=Bacillus subtilis (strain 168) GN=gatA PE=3 SV=3	400	52802	65.66	LNMDEFAMGSSTENSAYK
713	1::sw|O06493|OPUE_BACSU	Osmoregulated proline transporter OS=Bacillus subtilis (strain 168) GN=opuE PE=3 SV=1	46	53248	33.39	TTDINDYMLGGR
713	1::sw|O06493|OPUE_BACSU	Osmoregulated proline transporter OS=Bacillus subtilis (strain 168) GN=opuE PE=3 SV=1	46	53248	33.12	AYTEAADDAITIPDFFDKR
739	1::sw|O06725|YISL_BACSU	UPF0344 protein YisL OS=Bacillus subtilis (strain 168) GN=yisL PE=3 SV=1	43	13213	42.63	FANWNGEYAGK
164	1::sw|O06745|YITJ_BACSU	Bifunctional homocysteine S-methyltransferase/5,10-methylenetetrahydrofolate reductase OS=Bacillus subtilis (strain 168) GN=yitJ PE=2 SV=1	487	68341	57.44	AEGLAIAR
164	1::sw|O06745|YITJ_BACSU	Bifunctional homocysteine S-methyltransferase/5,10-methylenetetrahydrofolate reductase OS=Bacillus subtilis (strain 168) GN=yitJ PE=2 SV=1	487	68341	44.61	GLLEDLQR
164	1::sw|O06745|YITJ_BACSU	Bifunctional homocysteine S-methyltransferase/5,10-methylenetetrahydrofolate reductase OS=Bacillus subtilis (strain 168) GN=yitJ PE=2 SV=1	487	68341	28.49	FLSAAAELK
164	1::sw|O06745|YITJ_BACSU	Bifunctional homocysteine S-methyltransferase/5,10-methylenetetrahydrofolate reductase OS=Bacillus subtilis (strain 168) GN=yitJ PE=2 SV=1	487	68341	32.81	SLVHITCR
164	1::sw|O06745|YITJ_BACSU	Bifunctional homocysteine S-methyltransferase/5,10-methylenetetrahydrofolate reductase OS=Bacillus subtilis (strain 168) GN=yitJ PE=2 SV=1	487	68341	33.62	HGLEDDIKK
164	1::sw|O06745|YITJ_BACSU	Bifunctional homocysteine S-methyltransferase/5,10-methylenetetrahydrofolate reductase OS=Bacillus subtilis (strain 168) GN=yitJ PE=2 SV=1	487	68341	23.06	TEPGLDEIAAK
164	1::sw|O06745|YITJ_BACSU	Bifunctional homocysteine S-methyltransferase/5,10-methylenetetrahydrofolate reductase OS=Bacillus subtilis (strain 168) GN=yitJ PE=2 SV=1	487	68341	32.88	EFISVHHER
164	1::sw|O06745|YITJ_BACSU	Bifunctional homocysteine S-methyltransferase/5,10-methylenetetrahydrofolate reductase OS=Bacillus subtilis (strain 168) GN=yitJ PE=2 SV=1	487	68341	53.54	NAYSLDEIKR
164	1::sw|O06745|YITJ_BACSU	Bifunctional homocysteine S-methyltransferase/5,10-methylenetetrahydrofolate reductase OS=Bacillus subtilis (strain 168) GN=yitJ PE=2 SV=1	487	68341	18.59	AMAEAVGGLAPITEK
164	1::sw|O06745|YITJ_BACSU	Bifunctional homocysteine S-methyltransferase/5,10-methylenetetrahydrofolate reductase OS=Bacillus subtilis (strain 168) GN=yitJ PE=2 SV=1	487	68341	45.22	AMAEAVGGLAPITEK	Oxidation (M)
164	1::sw|O06745|YITJ_BACSU	Bifunctional homocysteine S-methyltransferase/5,10-methylenetetrahydrofolate reductase OS=Bacillus subtilis (strain 168) GN=yitJ PE=2 SV=1	487	68341	51.9	NAEFIHNEIPGIK
164	1::sw|O06745|YITJ_BACSU	Bifunctional homocysteine S-methyltransferase/5,10-methylenetetrahydrofolate reductase OS=Bacillus subtilis (strain 168) GN=yitJ PE=2 SV=1	487	68341	39.26	TNFSVAAAFNPNVR
164	1::sw|O06745|YITJ_BACSU	Bifunctional homocysteine S-methyltransferase/5,10-methylenetetrahydrofolate reductase OS=Bacillus subtilis (strain 168) GN=yitJ PE=2 SV=1	487	68341	82.66	ASAGDAYVLGTMGGIR
164	1::sw|O06745|YITJ_BACSU	Bifunctional homocysteine S-methyltransferase/5,10-methylenetetrahydrofolate reductase OS=Bacillus subtilis (strain 168) GN=yitJ PE=2 SV=1	487	68341	44.84	TPIYIGIMPLTSSR
164	1::sw|O06745|YITJ_BACSU	Bifunctional homocysteine S-methyltransferase/5,10-methylenetetrahydrofolate reductase OS=Bacillus subtilis (strain 168) GN=yitJ PE=2 SV=1	487	68341	65.29	SIADLGADIVGINCR
164	1::sw|O06745|YITJ_BACSU	Bifunctional homocysteine S-methyltransferase/5,10-methylenetetrahydrofolate reductase OS=Bacillus subtilis (strain 168) GN=yitJ PE=2 SV=1	487	68341	56.7	QFNEGLSLSGKPLGK
164	1::sw|O06745|YITJ_BACSU	Bifunctional homocysteine S-methyltransferase/5,10-methylenetetrahydrofolate reductase OS=Bacillus subtilis (strain 168) GN=yitJ PE=2 SV=1	487	68341	64.23	SDLTAELTSYIQQK
164	1::sw|O06745|YITJ_BACSU	Bifunctional homocysteine S-methyltransferase/5,10-methylenetetrahydrofolate reductase OS=Bacillus subtilis (strain 168) GN=yitJ PE=2 SV=1	487	68341	79.68	EAGIDALTLADNSLATPR
164	1::sw|O06745|YITJ_BACSU	Bifunctional homocysteine S-methyltransferase/5,10-methylenetetrahydrofolate reductase OS=Bacillus subtilis (strain 168) GN=yitJ PE=2 SV=1	487	68341	32.91	IGDFPGATSVYDLTSFDLIR
597	1::sw|O06746|YITK_BACSU	UPF0234 protein yitk OS=Bacillus subtilis (strain 168) GN=yitK PE=3 SV=1	73	18191	56.81	GADLPIDVQFINFR
597	1::sw|O06746|YITK_BACSU	UPF0234 protein yitk OS=Bacillus subtilis (strain 168) GN=yitK PE=3 SV=1	73	18191	36.38	VELPEVQNAIQIALK
528	1::sw|O06965|YVCA_BACSU	Putative lipoprotein YvcA OS=Bacillus subtilis (strain 168) GN=yvcA PE=2 SV=2	93	28082	63.29	LINSITFLIDK
528	1::sw|O06965|YVCA_BACSU	Putative lipoprotein YvcA OS=Bacillus subtilis (strain 168) GN=yvcA PE=2 SV=2	93	28082	51.07	EEEPGYYLLESK
292	1::sw|O06967|BMRA_BACSU	Multidrug resistance ABC transporter ATP-binding/permease protein BmrA OS=Bacillus subtilis (strain 168) GN=bmrA PE=1 SV=1	236	64535	27.15	TTIVIAHR
292	1::sw|O06967|BMRA_BACSU	Multidrug resistance ABC transporter ATP-binding/permease protein BmrA OS=Bacillus subtilis (strain 168) GN=bmrA PE=1 SV=1	236	64535	43.17	AAEMAYALNFIK
292	1::sw|O06967|BMRA_BACSU	Multidrug resistance ABC transporter ATP-binding/permease protein BmrA OS=Bacillus subtilis (strain 168) GN=bmrA PE=1 SV=1	236	64535	40.27	AAEMAYALNFIK
292	1::sw|O06967|BMRA_BACSU	Multidrug resistance ABC transporter ATP-binding/permease protein BmrA OS=Bacillus subtilis (strain 168) GN=bmrA PE=1 SV=1	236	64535	22.43	AAEMAYALNFIK
292	1::sw|O06967|BMRA_BACSU	Multidrug resistance ABC transporter ATP-binding/permease protein BmrA OS=Bacillus subtilis (strain 168) GN=bmrA PE=1 SV=1	236	64535	19.41	AAEMAYALNFIK
292	1::sw|O06967|BMRA_BACSU	Multidrug resistance ABC transporter ATP-binding/permease protein BmrA OS=Bacillus subtilis (strain 168) GN=bmrA PE=1 SV=1	236	64535	50.53	SVQQALEVLMEGR
292	1::sw|O06967|BMRA_BACSU	Multidrug resistance ABC transporter ATP-binding/permease protein BmrA OS=Bacillus subtilis (strain 168) GN=bmrA PE=1 SV=1	236	64535	31.35	ELPNQFDTEVGER
292	1::sw|O06967|BMRA_BACSU	Multidrug resistance ABC transporter ATP-binding/permease protein BmrA OS=Bacillus subtilis (strain 168) GN=bmrA PE=1 SV=1	236	64535	74.58	ELPNQFDTEVGER
292	1::sw|O06967|BMRA_BACSU	Multidrug resistance ABC transporter ATP-binding/permease protein BmrA OS=Bacillus subtilis (strain 168) GN=bmrA PE=1 SV=1	236	64535	62.73	ELPNQFDTEVGER
292	1::sw|O06967|BMRA_BACSU	Multidrug resistance ABC transporter ATP-binding/permease protein BmrA OS=Bacillus subtilis (strain 168) GN=bmrA PE=1 SV=1	236	64535	62.05	LPVSYFDTNASGETVSR
412	1::sw|O06973|YVCJ_BACSU	UPF0042 nucleotide-binding protein YvcJ OS=Bacillus subtilis (strain 168) GN=yvcJ PE=1 SV=1	141	33944	31.36	DYYTHVTHR
412	1::sw|O06973|YVCJ_BACSU	UPF0042 nucleotide-binding protein YvcJ OS=Bacillus subtilis (strain 168) GN=yvcJ PE=1 SV=1	141	33944	20.78	LIDLLSFMLPSYK
412	1::sw|O06973|YVCJ_BACSU	UPF0042 nucleotide-binding protein YvcJ OS=Bacillus subtilis (strain 168) GN=yvcJ PE=1 SV=1	141	33944	68.73	SQIIYDTSDMKPR
412	1::sw|O06973|YVCJ_BACSU	UPF0042 nucleotide-binding protein YvcJ OS=Bacillus subtilis (strain 168) GN=yvcJ PE=1 SV=1	141	33944	53.62	SQIIYDTSDMKPR
412	1::sw|O06973|YVCJ_BACSU	UPF0042 nucleotide-binding protein YvcJ OS=Bacillus subtilis (strain 168) GN=yvcJ PE=1 SV=1	141	33944	46.55	YGIPIDADLVFDVR
741	1::sw|O06976|CRH_BACSU	HPr-like protein Crh OS=Bacillus subtilis (strain 168) GN=crh PE=1 SV=1	42	9321	42.11	PAALFVQEANR
817	1::sw|O06980|YVCR_BACSU	Uncharacterized ABC transporter ATP-binding protein YvcR OS=Bacillus subtilis (strain 168) GN=yvcR PE=3 SV=1	29	29134	28.52	ENILLPLALDK
408	1::sw|O06986|YVDD_BACSU	LOG family protein YvdD OS=Bacillus subtilis (strain 168) GN=yvdD PE=1 SV=1	141	21154	55.18	YSIQEGFSNESHLK
408	1::sw|O06986|YVDD_BACSU	LOG family protein YvdD OS=Bacillus subtilis (strain 168) GN=yvdD PE=1 SV=1	141	21154	72.56	TICVFAGSNPGGNEAYK
408	1::sw|O06986|YVDD_BACSU	LOG family protein YvdD OS=Bacillus subtilis (strain 168) GN=yvdD PE=1 SV=1	141	21154	37.55	AAELGVYMAEQGIGLVYGGSR
408	1::sw|O06986|YVDD_BACSU	LOG family protein YvdD OS=Bacillus subtilis (strain 168) GN=yvdD PE=1 SV=1	141	21154	39.51	LIHSSSRPDELIEQMQNYSYPILEK
110	1::sw|O07020|LUTA_BACSU	Lactate utilization protein A OS=Bacillus subtilis (strain 168) GN=lutA PE=1 SV=1	832	27002	31.11	ATVELLER
110	1::sw|O07020|LUTA_BACSU	Lactate utilization protein A OS=Bacillus subtilis (strain 168) GN=lutA PE=1 SV=1	832	27002	30.99	ATVELLER
110	1::sw|O07020|LUTA_BACSU	Lactate utilization protein A OS=Bacillus subtilis (strain 168) GN=lutA PE=1 SV=1	832	27002	46.71	ATVELLER
110	1::sw|O07020|LUTA_BACSU	Lactate utilization protein A OS=Bacillus subtilis (strain 168) GN=lutA PE=1 SV=1	832	27002	38.95	ATVELLER
110	1::sw|O07020|LUTA_BACSU	Lactate utilization protein A OS=Bacillus subtilis (strain 168) GN=lutA PE=1 SV=1	832	27002	26	GLQFTELPGK
110	1::sw|O07020|LUTA_BACSU	Lactate utilization protein A OS=Bacillus subtilis (strain 168) GN=lutA PE=1 SV=1	832	27002	60.56	GLQFTELPGK
110	1::sw|O07020|LUTA_BACSU	Lactate utilization protein A OS=Bacillus subtilis (strain 168) GN=lutA PE=1 SV=1	832	27002	50.88	GLQFTELPGK
110	1::sw|O07020|LUTA_BACSU	Lactate utilization protein A OS=Bacillus subtilis (strain 168) GN=lutA PE=1 SV=1	832	27002	68.31	VMHIAEVLNSR
110	1::sw|O07020|LUTA_BACSU	Lactate utilization protein A OS=Bacillus subtilis (strain 168) GN=lutA PE=1 SV=1	832	27002	44.56	VMHIAEVLNSR	Oxidation (M)
110	1::sw|O07020|LUTA_BACSU	Lactate utilization protein A OS=Bacillus subtilis (strain 168) GN=lutA PE=1 SV=1	832	27002	51.08	VMHIAEVLNSR	Oxidation (M)
110	1::sw|O07020|LUTA_BACSU	Lactate utilization protein A OS=Bacillus subtilis (strain 168) GN=lutA PE=1 SV=1	832	27002	30.39	ATLHTSCHMTR
110	1::sw|O07020|LUTA_BACSU	Lactate utilization protein A OS=Bacillus subtilis (strain 168) GN=lutA PE=1 SV=1	832	27002	49.06	ATLHTSCHMTR
110	1::sw|O07020|LUTA_BACSU	Lactate utilization protein A OS=Bacillus subtilis (strain 168) GN=lutA PE=1 SV=1	832	27002	44.06	ATLHTSCHMTR
110	1::sw|O07020|LUTA_BACSU	Lactate utilization protein A OS=Bacillus subtilis (strain 168) GN=lutA PE=1 SV=1	832	27002	40.77	EYPHLFQDDPK
110	1::sw|O07020|LUTA_BACSU	Lactate utilization protein A OS=Bacillus subtilis (strain 168) GN=lutA PE=1 SV=1	832	27002	41.72	EYPHLFQDDPK
110	1::sw|O07020|LUTA_BACSU	Lactate utilization protein A OS=Bacillus subtilis (strain 168) GN=lutA PE=1 SV=1	832	27002	38.7	EYPHLFQDDPK
110	1::sw|O07020|LUTA_BACSU	Lactate utilization protein A OS=Bacillus subtilis (strain 168) GN=lutA PE=1 SV=1	832	27002	19.35	EYPHLFQDDPK
110	1::sw|O07020|LUTA_BACSU	Lactate utilization protein A OS=Bacillus subtilis (strain 168) GN=lutA PE=1 SV=1	832	27002	64.45	MAQISEQMVDEK
110	1::sw|O07020|LUTA_BACSU	Lactate utilization protein A OS=Bacillus subtilis (strain 168) GN=lutA PE=1 SV=1	832	27002	86.5	MAQISEQMVDEK
110	1::sw|O07020|LUTA_BACSU	Lactate utilization protein A OS=Bacillus subtilis (strain 168) GN=lutA PE=1 SV=1	832	27002	96.3	MAQISEQMVDEK
110	1::sw|O07020|LUTA_BACSU	Lactate utilization protein A OS=Bacillus subtilis (strain 168) GN=lutA PE=1 SV=1	832	27002	96.08	MAQISEQMVDEK
110	1::sw|O07020|LUTA_BACSU	Lactate utilization protein A OS=Bacillus subtilis (strain 168) GN=lutA PE=1 SV=1	832	27002	90.7	MAQISEQMVDEK
110	1::sw|O07020|LUTA_BACSU	Lactate utilization protein A OS=Bacillus subtilis (strain 168) GN=lutA PE=1 SV=1	832	27002	96.12	MAQISEQMVDEK
110	1::sw|O07020|LUTA_BACSU	Lactate utilization protein A OS=Bacillus subtilis (strain 168) GN=lutA PE=1 SV=1	832	27002	70.2	MAQISEQMVDEK
110	1::sw|O07020|LUTA_BACSU	Lactate utilization protein A OS=Bacillus subtilis (strain 168) GN=lutA PE=1 SV=1	832	27002	36.4	MAQISEQMVDEK	Oxidation (M)
110	1::sw|O07020|LUTA_BACSU	Lactate utilization protein A OS=Bacillus subtilis (strain 168) GN=lutA PE=1 SV=1	832	27002	34.08	HNCCGFGGTFSVK
110	1::sw|O07020|LUTA_BACSU	Lactate utilization protein A OS=Bacillus subtilis (strain 168) GN=lutA PE=1 SV=1	832	27002	27.63	HNCCGFGGTFSVK
110	1::sw|O07020|LUTA_BACSU	Lactate utilization protein A OS=Bacillus subtilis (strain 168) GN=lutA PE=1 SV=1	832	27002	64.28	VSLFVTCLVDMFQTNVGK
115	1::sw|O07021|LUTB_BACSU	Lactate utilization protein B OS=Bacillus subtilis (strain 168) GN=lutB PE=1 SV=2	763	53953	26.12	SLSEEIR
115	1::sw|O07021|LUTB_BACSU	Lactate utilization protein B OS=Bacillus subtilis (strain 168) GN=lutB PE=1 SV=2	763	53953	46.03	IPLHELLLK
115	1::sw|O07021|LUTB_BACSU	Lactate utilization protein B OS=Bacillus subtilis (strain 168) GN=lutB PE=1 SV=2	763	53953	70.23	TAEEASSYIR
115	1::sw|O07021|LUTB_BACSU	Lactate utilization protein B OS=Bacillus subtilis (strain 168) GN=lutB PE=1 SV=2	763	53953	26.27	TAEEASSYIR
115	1::sw|O07021|LUTB_BACSU	Lactate utilization protein B OS=Bacillus subtilis (strain 168) GN=lutB PE=1 SV=2	763	53953	54.95	TQITVMGMER
115	1::sw|O07021|LUTB_BACSU	Lactate utilization protein B OS=Bacillus subtilis (strain 168) GN=lutB PE=1 SV=2	763	53953	71.89	LTSYITALTGPK
115	1::sw|O07021|LUTB_BACSU	Lactate utilization protein B OS=Bacillus subtilis (strain 168) GN=lutB PE=1 SV=2	763	53953	55.06	LTSYITALTGPK
115	1::sw|O07021|LUTB_BACSU	Lactate utilization protein B OS=Bacillus subtilis (strain 168) GN=lutB PE=1 SV=2	763	53953	68	LTSYITALTGPK
115	1::sw|O07021|LUTB_BACSU	Lactate utilization protein B OS=Bacillus subtilis (strain 168) GN=lutB PE=1 SV=2	763	53953	88.23	LTSYITALTGPK
115	1::sw|O07021|LUTB_BACSU	Lactate utilization protein B OS=Bacillus subtilis (strain 168) GN=lutB PE=1 SV=2	763	53953	18.38	VSQGIDNEFMR
115	1::sw|O07021|LUTB_BACSU	Lactate utilization protein B OS=Bacillus subtilis (strain 168) GN=lutB PE=1 SV=2	763	53953	28.64	VSQGIDNEFMR
115	1::sw|O07021|LUTB_BACSU	Lactate utilization protein B OS=Bacillus subtilis (strain 168) GN=lutB PE=1 SV=2	763	53953	63.79	VSQGIDNEFMR
115	1::sw|O07021|LUTB_BACSU	Lactate utilization protein B OS=Bacillus subtilis (strain 168) GN=lutB PE=1 SV=2	763	53953	45.18	VSQGIDNEFMR
115	1::sw|O07021|LUTB_BACSU	Lactate utilization protein B OS=Bacillus subtilis (strain 168) GN=lutB PE=1 SV=2	763	53953	86.58	AFGLGASSLSLYK
115	1::sw|O07021|LUTB_BACSU	Lactate utilization protein B OS=Bacillus subtilis (strain 168) GN=lutB PE=1 SV=2	763	53953	84.13	AFGLGASSLSLYK
115	1::sw|O07021|LUTB_BACSU	Lactate utilization protein B OS=Bacillus subtilis (strain 168) GN=lutB PE=1 SV=2	763	53953	62.26	WAPAAMTPFTEDEK
115	1::sw|O07021|LUTB_BACSU	Lactate utilization protein B OS=Bacillus subtilis (strain 168) GN=lutB PE=1 SV=2	763	53953	63.34	LEAAEELGNWEEWR
115	1::sw|O07021|LUTB_BACSU	Lactate utilization protein B OS=Bacillus subtilis (strain 168) GN=lutB PE=1 SV=2	763	53953	85.55	SMVTEEINLNEVLEK
115	1::sw|O07021|LUTB_BACSU	Lactate utilization protein B OS=Bacillus subtilis (strain 168) GN=lutB PE=1 SV=2	763	53953	64.33	SNILGTEFQSVLQCIR
115	1::sw|O07021|LUTB_BACSU	Lactate utilization protein B OS=Bacillus subtilis (strain 168) GN=lutB PE=1 SV=2	763	53953	64.3	IVPSFSEFEVLVSMLTR
115	1::sw|O07021|LUTB_BACSU	Lactate utilization protein B OS=Bacillus subtilis (strain 168) GN=lutB PE=1 SV=2	763	53953	19.35	LDYQHTEKPEELVMHAR
555	1::sw|O07079|YRDA_BACSU	Uncharacterized protein YrdA OS=Bacillus subtilis (strain 168) GN=yrdA PE=3 SV=1	86	18905	48.89	LLNSLTDESLK
555	1::sw|O07079|YRDA_BACSU	Uncharacterized protein YrdA OS=Bacillus subtilis (strain 168) GN=yrdA PE=3 SV=1	86	18905	61.8	SWEFEADATQK
555	1::sw|O07079|YRDA_BACSU	Uncharacterized protein YrdA OS=Bacillus subtilis (strain 168) GN=yrdA PE=3 SV=1	86	18905	18.52	QAGLTVPGIYGPAK
411	1::sw|O07516|YHAH_BACSU	Uncharacterized membrane protein YhaH OS=Bacillus subtilis (strain 168) GN=yhaH PE=4 SV=1	141	13058	43.39	DVGGELQTSIK
411	1::sw|O07516|YHAH_BACSU	Uncharacterized membrane protein YhaH OS=Bacillus subtilis (strain 168) GN=yhaH PE=4 SV=1	141	13058	25.61	DVGGELQTSIK
411	1::sw|O07516|YHAH_BACSU	Uncharacterized membrane protein YhaH OS=Bacillus subtilis (strain 168) GN=yhaH PE=4 SV=1	141	13058	70	TNYDSFEETIK
411	1::sw|O07516|YHAH_BACSU	Uncharacterized membrane protein YhaH OS=Bacillus subtilis (strain 168) GN=yhaH PE=4 SV=1	141	13058	70.29	TNYDSFEETIKR
438	1::sw|O07521|YHAM_BACSU	3~-5~ exoribonuclease YhaM OS=Bacillus subtilis (strain 168) GN=yhaM PE=1 SV=1	125	35660	71.3	DLLYAGVILHDLGK
438	1::sw|O07521|YHAM_BACSU	3~-5~ exoribonuclease YhaM OS=Bacillus subtilis (strain 168) GN=yhaM PE=1 SV=1	125	35660	74.28	DLLYAGVILHDLGK
730	1::sw|O07523|YHAP_BACSU	Uncharacterized protein YhaP OS=Bacillus subtilis (strain 168) GN=yhaP PE=1 SV=2	44	45446	41.66	IAVVDETNELYPVFSK
730	1::sw|O07523|YHAP_BACSU	Uncharacterized protein YhaP OS=Bacillus subtilis (strain 168) GN=yhaP PE=1 SV=2	44	45446	24.83	IAVVDETNELYPVFSK
228	1::sw|O07539|YHAX_BACSU	Stress response protein YhaX OS=Bacillus subtilis (strain 168) GN=yhaX PE=1 SV=2	332	32444	49.42	IDAPFFEK
228	1::sw|O07539|YHAX_BACSU	Stress response protein YhaX OS=Bacillus subtilis (strain 168) GN=yhaX PE=1 SV=2	332	32444	49.05	AFPAVDVIR
228	1::sw|O07539|YHAX_BACSU	Stress response protein YhaX OS=Bacillus subtilis (strain 168) GN=yhaX PE=1 SV=2	332	32444	60.02	LITHSGAYIAEK
228	1::sw|O07539|YHAX_BACSU	Stress response protein YhaX OS=Bacillus subtilis (strain 168) GN=yhaX PE=1 SV=2	332	32444	90.24	SNDEQGVAYMMK
228	1::sw|O07539|YHAX_BACSU	Stress response protein YhaX OS=Bacillus subtilis (strain 168) GN=yhaX PE=1 SV=2	332	32444	79	SNDEQGVAYMMK
228	1::sw|O07539|YHAX_BACSU	Stress response protein YhaX OS=Bacillus subtilis (strain 168) GN=yhaX PE=1 SV=2	332	32444	70.5	SNDEQGVAYMMK
228	1::sw|O07539|YHAX_BACSU	Stress response protein YhaX OS=Bacillus subtilis (strain 168) GN=yhaX PE=1 SV=2	332	32444	25.23	QLLALNIDGALLR
228	1::sw|O07539|YHAX_BACSU	Stress response protein YhaX OS=Bacillus subtilis (strain 168) GN=yhaX PE=1 SV=2	332	32444	73.33	QLLALNIDGALLR
770	1::sw|O07543|YHEB_BACSU	UPF0754 membrane protein YheB OS=Bacillus subtilis (strain 168) GN=yheB PE=3 SV=1	36	42881	36.2	LLEGISSNLESVLK
720	1::sw|O07544|YHEC_BACSU	Endospore coat-associated protein YheC OS=Bacillus subtilis (strain 168) GN=yheC PE=3 SV=1	45	42242	44.96	FTPFDISPDTLR
689	1::sw|O07556|YHJB_BACSU	Uncharacterized symporter YhjB OS=Bacillus subtilis (strain 168) GN=yhjB PE=3 SV=1	50	52784	42.98	LMSQSDFFTK
689	1::sw|O07556|YHJB_BACSU	Uncharacterized symporter YhjB OS=Bacillus subtilis (strain 168) GN=yhjB PE=3 SV=1	50	52784	31.19	DMNLEQWTVGGR
769	1::sw|O07573|NSRR_BACSU	HTH-type transcriptional regulator NsrR OS=Bacillus subtilis (strain 168) GN=nsrR PE=4 SV=1	36	16770	36.38	LGQLGYVETIR
157	1::sw|O07576|YHDG_BACSU	Uncharacterized amino acid permease YhdG OS=Bacillus subtilis (strain 168) GN=yhdG PE=2 SV=1	515	49906	74.99	SIQDLIAATSGEK
157	1::sw|O07576|YHDG_BACSU	Uncharacterized amino acid permease YhdG OS=Bacillus subtilis (strain 168) GN=yhdG PE=2 SV=1	515	49906	72.29	SIQDLIAATSGEK
157	1::sw|O07576|YHDG_BACSU	Uncharacterized amino acid permease YhdG OS=Bacillus subtilis (strain 168) GN=yhdG PE=2 SV=1	515	49906	79.86	SIQDLIAATSGEK
157	1::sw|O07576|YHDG_BACSU	Uncharacterized amino acid permease YhdG OS=Bacillus subtilis (strain 168) GN=yhdG PE=2 SV=1	515	49906	67.7	SIQDLIAATSGEK
157	1::sw|O07576|YHDG_BACSU	Uncharacterized amino acid permease YhdG OS=Bacillus subtilis (strain 168) GN=yhdG PE=2 SV=1	515	49906	88.11	SIQDLIAATSGEK
157	1::sw|O07576|YHDG_BACSU	Uncharacterized amino acid permease YhdG OS=Bacillus subtilis (strain 168) GN=yhdG PE=2 SV=1	515	49906	61.76	SIQDLIAATSGEK
157	1::sw|O07576|YHDG_BACSU	Uncharacterized amino acid permease YhdG OS=Bacillus subtilis (strain 168) GN=yhdG PE=2 SV=1	515	49906	84.35	SIQDLIAATSGEK
157	1::sw|O07576|YHDG_BACSU	Uncharacterized amino acid permease YhdG OS=Bacillus subtilis (strain 168) GN=yhdG PE=2 SV=1	515	49906	67.73	SIQDLIAATSGEK
157	1::sw|O07576|YHDG_BACSU	Uncharacterized amino acid permease YhdG OS=Bacillus subtilis (strain 168) GN=yhdG PE=2 SV=1	515	49906	62.95	SIQDLIAATSGEK
157	1::sw|O07576|YHDG_BACSU	Uncharacterized amino acid permease YhdG OS=Bacillus subtilis (strain 168) GN=yhdG PE=2 SV=1	515	49906	66.73	SIQDLIAATSGEK
530	1::sw|O07581|YHDL_BACSU	Probable anti-sigma-M factor YhdL OS=Bacillus subtilis (strain 168) GN=yhdL PE=1 SV=1	92	40612	20.37	DLNVDNR
530	1::sw|O07581|YHDL_BACSU	Probable anti-sigma-M factor YhdL OS=Bacillus subtilis (strain 168) GN=yhdL PE=1 SV=1	92	40612	19.84	RFDQYK
530	1::sw|O07581|YHDL_BACSU	Probable anti-sigma-M factor YhdL OS=Bacillus subtilis (strain 168) GN=yhdL PE=1 SV=1	92	40612	33.24	TASTEPLGYPGK
530	1::sw|O07581|YHDL_BACSU	Probable anti-sigma-M factor YhdL OS=Bacillus subtilis (strain 168) GN=yhdL PE=1 SV=1	92	40612	31.07	TASTEPLGYPGK
530	1::sw|O07581|YHDL_BACSU	Probable anti-sigma-M factor YhdL OS=Bacillus subtilis (strain 168) GN=yhdL PE=1 SV=1	92	40612	47.55	LFGMNTEFPLQK
530	1::sw|O07581|YHDL_BACSU	Probable anti-sigma-M factor YhdL OS=Bacillus subtilis (strain 168) GN=yhdL PE=1 SV=1	92	40612	31.54	APAVNYYDLEVNK
530	1::sw|O07581|YHDL_BACSU	Probable anti-sigma-M factor YhdL OS=Bacillus subtilis (strain 168) GN=yhdL PE=1 SV=1	92	40612	36.27	TLSTLPEGTVSEVYLSYDR
636	1::sw|O07584|PLSC_BACSU	1-acyl-sn-glycerol-3-phosphate acyltransferase OS=Bacillus subtilis (strain 168) GN=plsC PE=1 SV=1	62	22023	19.11	TSEDVPLK
636	1::sw|O07584|PLSC_BACSU	1-acyl-sn-glycerol-3-phosphate acyltransferase OS=Bacillus subtilis (strain 168) GN=plsC PE=1 SV=1	62	22023	41.49	TSEDVPLKR
636	1::sw|O07584|PLSC_BACSU	1-acyl-sn-glycerol-3-phosphate acyltransferase OS=Bacillus subtilis (strain 168) GN=plsC PE=1 SV=1	62	22023	33.66	EGEIVGIFPSGTR
636	1::sw|O07584|PLSC_BACSU	1-acyl-sn-glycerol-3-phosphate acyltransferase OS=Bacillus subtilis (strain 168) GN=plsC PE=1 SV=1	62	22023	25.16	APLVPAAYQGPSSGK
636	1::sw|O07584|PLSC_BACSU	1-acyl-sn-glycerol-3-phosphate acyltransferase OS=Bacillus subtilis (strain 168) GN=plsC PE=1 SV=1	62	22023	29.19	APLVPAAYQGPSSGK
331	1::sw|O07585|YHDP_BACSU	UPF0053 protein YhdP OS=Bacillus subtilis (strain 168) GN=yhdP PE=3 SV=1	198	49995	59.16	IDQLIAEGNK
331	1::sw|O07585|YHDP_BACSU	UPF0053 protein YhdP OS=Bacillus subtilis (strain 168) GN=yhdP PE=3 SV=1	198	49995	26.23	SGEINQSEFK
331	1::sw|O07585|YHDP_BACSU	UPF0053 protein YhdP OS=Bacillus subtilis (strain 168) GN=yhdP PE=3 SV=1	198	49995	31.67	IGEGHYILDGK
331	1::sw|O07585|YHDP_BACSU	UPF0053 protein YhdP OS=Bacillus subtilis (strain 168) GN=yhdP PE=3 SV=1	198	49995	79.44	ISEMMDIIQIEK
331	1::sw|O07585|YHDP_BACSU	UPF0053 protein YhdP OS=Bacillus subtilis (strain 168) GN=yhdP PE=3 SV=1	198	49995	57.48	IAFPFIWLLNNSAR
331	1::sw|O07585|YHDP_BACSU	UPF0053 protein YhdP OS=Bacillus subtilis (strain 168) GN=yhdP PE=3 SV=1	198	49995	38.3	KLQEEELLETANQQEA
331	1::sw|O07585|YHDP_BACSU	UPF0053 protein YhdP OS=Bacillus subtilis (strain 168) GN=yhdP PE=3 SV=1	198	49995	42.38	AFGLETVSENELAHSEEELR
789	1::sw|O07595|NPD_BACSU	NAD-dependent protein deacetylase OS=Bacillus subtilis (strain 168) GN=cobB PE=3 SV=1	33	27685	33.31	SAGGIWTEDASR
454	1::sw|O07597|DAAA_BACSU	D-alanine aminotransferase OS=Bacillus subtilis (strain 168) GN=dat PE=3 SV=1	118	31220	33.36	MNILGLIEK
454	1::sw|O07597|DAAA_BACSU	D-alanine aminotransferase OS=Bacillus subtilis (strain 168) GN=dat PE=3 SV=1	118	31220	61.13	LDETPVSEEELK
454	1::sw|O07597|DAAA_BACSU	D-alanine aminotransferase OS=Bacillus subtilis (strain 168) GN=dat PE=3 SV=1	118	31220	39.02	LDETPVSEEELK
454	1::sw|O07597|DAAA_BACSU	D-alanine aminotransferase OS=Bacillus subtilis (strain 168) GN=dat PE=3 SV=1	118	31220	55.17	GYQFGDGIYEVIR
426	1::sw|O07598|YHAA_BACSU	Putative amidohydrolase YhaA OS=Bacillus subtilis (strain 168) GN=yhaA PE=3 SV=3	132	43478	64.09	PGAVMAAADR
426	1::sw|O07598|YHAA_BACSU	Putative amidohydrolase YhaA OS=Bacillus subtilis (strain 168) GN=yhaA PE=3 SV=3	132	43478	60.27	VLAGAAITYHQL
426	1::sw|O07598|YHAA_BACSU	Putative amidohydrolase YhaA OS=Bacillus subtilis (strain 168) GN=yhaA PE=3 SV=3	132	43478	53.86	GVLANIEGSEPGPTVALR
426	1::sw|O07598|YHAA_BACSU	Putative amidohydrolase YhaA OS=Bacillus subtilis (strain 168) GN=yhaA PE=3 SV=3	132	43478	21.23	DAVLIGSQIVSSLQHIVSR
51	1::sw|O07605|GLTT_BACSU	Proton/sodium-glutamate symport protein OS=Bacillus subtilis (strain 168) GN=gltT PE=3 SV=1	1673	46004	33.34	IAGISIFK
51	1::sw|O07605|GLTT_BACSU	Proton/sodium-glutamate symport protein OS=Bacillus subtilis (strain 168) GN=gltT PE=3 SV=1	1673	46004	41.07	AETVMSQSK
51	1::sw|O07605|GLTT_BACSU	Proton/sodium-glutamate symport protein OS=Bacillus subtilis (strain 168) GN=gltT PE=3 SV=1	1673	46004	30.1	AETVMSQSK
51	1::sw|O07605|GLTT_BACSU	Proton/sodium-glutamate symport protein OS=Bacillus subtilis (strain 168) GN=gltT PE=3 SV=1	1673	46004	49.67	AETVMSQSK
51	1::sw|O07605|GLTT_BACSU	Proton/sodium-glutamate symport protein OS=Bacillus subtilis (strain 168) GN=gltT PE=3 SV=1	1673	46004	44.48	AETVMSQSK
51	1::sw|O07605|GLTT_BACSU	Proton/sodium-glutamate symport protein OS=Bacillus subtilis (strain 168) GN=gltT PE=3 SV=1	1673	46004	29.57	AETVMSQSK
51	1::sw|O07605|GLTT_BACSU	Proton/sodium-glutamate symport protein OS=Bacillus subtilis (strain 168) GN=gltT PE=3 SV=1	1673	46004	47.9	AETVMSQSK
51	1::sw|O07605|GLTT_BACSU	Proton/sodium-glutamate symport protein OS=Bacillus subtilis (strain 168) GN=gltT PE=3 SV=1	1673	46004	47.37	AETVMSQSK
51	1::sw|O07605|GLTT_BACSU	Proton/sodium-glutamate symport protein OS=Bacillus subtilis (strain 168) GN=gltT PE=3 SV=1	1673	46004	39.9	AETVMSQSK
51	1::sw|O07605|GLTT_BACSU	Proton/sodium-glutamate symport protein OS=Bacillus subtilis (strain 168) GN=gltT PE=3 SV=1	1673	46004	18.7	WEGMFNPAK
51	1::sw|O07605|GLTT_BACSU	Proton/sodium-glutamate symport protein OS=Bacillus subtilis (strain 168) GN=gltT PE=3 SV=1	1673	46004	34.71	WEGMFNPAK
51	1::sw|O07605|GLTT_BACSU	Proton/sodium-glutamate symport protein OS=Bacillus subtilis (strain 168) GN=gltT PE=3 SV=1	1673	46004	42.45	WEGMFNPAK
51	1::sw|O07605|GLTT_BACSU	Proton/sodium-glutamate symport protein OS=Bacillus subtilis (strain 168) GN=gltT PE=3 SV=1	1673	46004	66.52	SDISQYVETEK
51	1::sw|O07605|GLTT_BACSU	Proton/sodium-glutamate symport protein OS=Bacillus subtilis (strain 168) GN=gltT PE=3 SV=1	1673	46004	69.32	SDISQYVETEK
51	1::sw|O07605|GLTT_BACSU	Proton/sodium-glutamate symport protein OS=Bacillus subtilis (strain 168) GN=gltT PE=3 SV=1	1673	46004	71.18	SDISQYVETEK
51	1::sw|O07605|GLTT_BACSU	Proton/sodium-glutamate symport protein OS=Bacillus subtilis (strain 168) GN=gltT PE=3 SV=1	1673	46004	72.39	SDISQYVETEK
51	1::sw|O07605|GLTT_BACSU	Proton/sodium-glutamate symport protein OS=Bacillus subtilis (strain 168) GN=gltT PE=3 SV=1	1673	46004	75.07	SDISQYVETEK
51	1::sw|O07605|GLTT_BACSU	Proton/sodium-glutamate symport protein OS=Bacillus subtilis (strain 168) GN=gltT PE=3 SV=1	1673	46004	43.3	SDISQYVETEK
51	1::sw|O07605|GLTT_BACSU	Proton/sodium-glutamate symport protein OS=Bacillus subtilis (strain 168) GN=gltT PE=3 SV=1	1673	46004	74.19	SDISQYVETEK
51	1::sw|O07605|GLTT_BACSU	Proton/sodium-glutamate symport protein OS=Bacillus subtilis (strain 168) GN=gltT PE=3 SV=1	1673	46004	79.11	SDISQYVETEK
51	1::sw|O07605|GLTT_BACSU	Proton/sodium-glutamate symport protein OS=Bacillus subtilis (strain 168) GN=gltT PE=3 SV=1	1673	46004	50.01	SDISQYVETEK
51	1::sw|O07605|GLTT_BACSU	Proton/sodium-glutamate symport protein OS=Bacillus subtilis (strain 168) GN=gltT PE=3 SV=1	1673	46004	65.57	SDISQYVETEK
51	1::sw|O07605|GLTT_BACSU	Proton/sodium-glutamate symport protein OS=Bacillus subtilis (strain 168) GN=gltT PE=3 SV=1	1673	46004	84.05	SDISQYVETEK
51	1::sw|O07605|GLTT_BACSU	Proton/sodium-glutamate symport protein OS=Bacillus subtilis (strain 168) GN=gltT PE=3 SV=1	1673	46004	73.92	SDISQYVETEK
51	1::sw|O07605|GLTT_BACSU	Proton/sodium-glutamate symport protein OS=Bacillus subtilis (strain 168) GN=gltT PE=3 SV=1	1673	46004	21.67	SDISQYVETEK
51	1::sw|O07605|GLTT_BACSU	Proton/sodium-glutamate symport protein OS=Bacillus subtilis (strain 168) GN=gltT PE=3 SV=1	1673	46004	70.88	SDISQYVETEK
51	1::sw|O07605|GLTT_BACSU	Proton/sodium-glutamate symport protein OS=Bacillus subtilis (strain 168) GN=gltT PE=3 SV=1	1673	46004	62.2	SDISQYVETEK
51	1::sw|O07605|GLTT_BACSU	Proton/sodium-glutamate symport protein OS=Bacillus subtilis (strain 168) GN=gltT PE=3 SV=1	1673	46004	57.66	SDISQYVETEK
51	1::sw|O07605|GLTT_BACSU	Proton/sodium-glutamate symport protein OS=Bacillus subtilis (strain 168) GN=gltT PE=3 SV=1	1673	46004	78.19	TVVNLTGNALAAVVMSK
51	1::sw|O07605|GLTT_BACSU	Proton/sodium-glutamate symport protein OS=Bacillus subtilis (strain 168) GN=gltT PE=3 SV=1	1673	46004	49.57	TVVNLTGNALAAVVMSK
51	1::sw|O07605|GLTT_BACSU	Proton/sodium-glutamate symport protein OS=Bacillus subtilis (strain 168) GN=gltT PE=3 SV=1	1673	46004	61.85	TVVNLTGNALAAVVMSK
51	1::sw|O07605|GLTT_BACSU	Proton/sodium-glutamate symport protein OS=Bacillus subtilis (strain 168) GN=gltT PE=3 SV=1	1673	46004	100.28	TVVNLTGNALAAVVMSK
51	1::sw|O07605|GLTT_BACSU	Proton/sodium-glutamate symport protein OS=Bacillus subtilis (strain 168) GN=gltT PE=3 SV=1	1673	46004	104.28	TVVNLTGNALAAVVMSK
51	1::sw|O07605|GLTT_BACSU	Proton/sodium-glutamate symport protein OS=Bacillus subtilis (strain 168) GN=gltT PE=3 SV=1	1673	46004	104.21	TVVNLTGNALAAVVMSK
51	1::sw|O07605|GLTT_BACSU	Proton/sodium-glutamate symport protein OS=Bacillus subtilis (strain 168) GN=gltT PE=3 SV=1	1673	46004	118.63	TVVNLTGNALAAVVMSK
51	1::sw|O07605|GLTT_BACSU	Proton/sodium-glutamate symport protein OS=Bacillus subtilis (strain 168) GN=gltT PE=3 SV=1	1673	46004	30.63	TVVNLTGNALAAVVMSK	Oxidation (M)
51	1::sw|O07605|GLTT_BACSU	Proton/sodium-glutamate symport protein OS=Bacillus subtilis (strain 168) GN=gltT PE=3 SV=1	1673	46004	39.76	TVVNLTGNALAAVVMSK	Oxidation (M)
51	1::sw|O07605|GLTT_BACSU	Proton/sodium-glutamate symport protein OS=Bacillus subtilis (strain 168) GN=gltT PE=3 SV=1	1673	46004	69.43	TVVNLTGNALAAVVMSK	Oxidation (M)
51	1::sw|O07605|GLTT_BACSU	Proton/sodium-glutamate symport protein OS=Bacillus subtilis (strain 168) GN=gltT PE=3 SV=1	1673	46004	56.91	SDISQYVETEKEQSNK
51	1::sw|O07605|GLTT_BACSU	Proton/sodium-glutamate symport protein OS=Bacillus subtilis (strain 168) GN=gltT PE=3 SV=1	1673	46004	56.63	SDISQYVETEKEQSNK
51	1::sw|O07605|GLTT_BACSU	Proton/sodium-glutamate symport protein OS=Bacillus subtilis (strain 168) GN=gltT PE=3 SV=1	1673	46004	52.87	SDISQYVETEKEQSNK
51	1::sw|O07605|GLTT_BACSU	Proton/sodium-glutamate symport protein OS=Bacillus subtilis (strain 168) GN=gltT PE=3 SV=1	1673	46004	45.44	SDISQYVETEKEQSNK
51	1::sw|O07605|GLTT_BACSU	Proton/sodium-glutamate symport protein OS=Bacillus subtilis (strain 168) GN=gltT PE=3 SV=1	1673	46004	63.79	SDISQYVETEKEQSNK
51	1::sw|O07605|GLTT_BACSU	Proton/sodium-glutamate symport protein OS=Bacillus subtilis (strain 168) GN=gltT PE=3 SV=1	1673	46004	57.09	SDISQYVETEKEQSNK
51	1::sw|O07605|GLTT_BACSU	Proton/sodium-glutamate symport protein OS=Bacillus subtilis (strain 168) GN=gltT PE=3 SV=1	1673	46004	47.7	SDISQYVETEKEQSNK
51	1::sw|O07605|GLTT_BACSU	Proton/sodium-glutamate symport protein OS=Bacillus subtilis (strain 168) GN=gltT PE=3 SV=1	1673	46004	38.24	SDISQYVETEKEQSNK
51	1::sw|O07605|GLTT_BACSU	Proton/sodium-glutamate symport protein OS=Bacillus subtilis (strain 168) GN=gltT PE=3 SV=1	1673	46004	57.08	SDISQYVETEKEQSNK
51	1::sw|O07605|GLTT_BACSU	Proton/sodium-glutamate symport protein OS=Bacillus subtilis (strain 168) GN=gltT PE=3 SV=1	1673	46004	57.06	SDISQYVETEKEQSNK
51	1::sw|O07605|GLTT_BACSU	Proton/sodium-glutamate symport protein OS=Bacillus subtilis (strain 168) GN=gltT PE=3 SV=1	1673	46004	23.43	SDISQYVETEKEQSNK
588	1::sw|O07608|LPLJ_BACSU	Lipoate-protein ligase LplJ OS=Bacillus subtilis (strain 168) GN=lplJ PE=1 SV=1	74	38111	74.32	SVIADVLEGVNLK
200	1::sw|O07621|HEMAT_BACSU	Heme-based aerotactic transducer HemAT OS=Bacillus subtilis (strain 168) GN=hemAT PE=1 SV=1	389	48738	29.82	IASIHLR
200	1::sw|O07621|HEMAT_BACSU	Heme-based aerotactic transducer HemAT OS=Bacillus subtilis (strain 168) GN=hemAT PE=1 SV=1	389	48738	30.07	IASIHLR
200	1::sw|O07621|HEMAT_BACSU	Heme-based aerotactic transducer HemAT OS=Bacillus subtilis (strain 168) GN=hemAT PE=1 SV=1	389	48738	26.07	IASIHLR
200	1::sw|O07621|HEMAT_BACSU	Heme-based aerotactic transducer HemAT OS=Bacillus subtilis (strain 168) GN=hemAT PE=1 SV=1	389	48738	26.14	IASIHLR
200	1::sw|O07621|HEMAT_BACSU	Heme-based aerotactic transducer HemAT OS=Bacillus subtilis (strain 168) GN=hemAT PE=1 SV=1	389	48738	29.97	IASIHLR
200	1::sw|O07621|HEMAT_BACSU	Heme-based aerotactic transducer HemAT OS=Bacillus subtilis (strain 168) GN=hemAT PE=1 SV=1	389	48738	30.29	IASIHLR
200	1::sw|O07621|HEMAT_BACSU	Heme-based aerotactic transducer HemAT OS=Bacillus subtilis (strain 168) GN=hemAT PE=1 SV=1	389	48738	29.89	IASIHLR
200	1::sw|O07621|HEMAT_BACSU	Heme-based aerotactic transducer HemAT OS=Bacillus subtilis (strain 168) GN=hemAT PE=1 SV=1	389	48738	29.57	ELEVQQK
200	1::sw|O07621|HEMAT_BACSU	Heme-based aerotactic transducer HemAT OS=Bacillus subtilis (strain 168) GN=hemAT PE=1 SV=1	389	48738	51.84	GFAVVANEVR
200	1::sw|O07621|HEMAT_BACSU	Heme-based aerotactic transducer HemAT OS=Bacillus subtilis (strain 168) GN=hemAT PE=1 SV=1	389	48738	59.4	DVNELVSESK
200	1::sw|O07621|HEMAT_BACSU	Heme-based aerotactic transducer HemAT OS=Bacillus subtilis (strain 168) GN=hemAT PE=1 SV=1	389	48738	18.84	IDTSLVQIEK
200	1::sw|O07621|HEMAT_BACSU	Heme-based aerotactic transducer HemAT OS=Bacillus subtilis (strain 168) GN=hemAT PE=1 SV=1	389	48738	20.7	IDTSLVQIEK
200	1::sw|O07621|HEMAT_BACSU	Heme-based aerotactic transducer HemAT OS=Bacillus subtilis (strain 168) GN=hemAT PE=1 SV=1	389	48738	20.77	IDTSLVQIEK
200	1::sw|O07621|HEMAT_BACSU	Heme-based aerotactic transducer HemAT OS=Bacillus subtilis (strain 168) GN=hemAT PE=1 SV=1	389	48738	20.84	IDTSLVQIEK
200	1::sw|O07621|HEMAT_BACSU	Heme-based aerotactic transducer HemAT OS=Bacillus subtilis (strain 168) GN=hemAT PE=1 SV=1	389	48738	20.98	IDTSLVQIEK
200	1::sw|O07621|HEMAT_BACSU	Heme-based aerotactic transducer HemAT OS=Bacillus subtilis (strain 168) GN=hemAT PE=1 SV=1	389	48738	22.49	IDTSLVQIEK
200	1::sw|O07621|HEMAT_BACSU	Heme-based aerotactic transducer HemAT OS=Bacillus subtilis (strain 168) GN=hemAT PE=1 SV=1	389	48738	66.3	IDTSLVQIEK
200	1::sw|O07621|HEMAT_BACSU	Heme-based aerotactic transducer HemAT OS=Bacillus subtilis (strain 168) GN=hemAT PE=1 SV=1	389	48738	59.98	IDTSLVQIEK
200	1::sw|O07621|HEMAT_BACSU	Heme-based aerotactic transducer HemAT OS=Bacillus subtilis (strain 168) GN=hemAT PE=1 SV=1	389	48738	47.1	LDEIAQQIEK
200	1::sw|O07621|HEMAT_BACSU	Heme-based aerotactic transducer HemAT OS=Bacillus subtilis (strain 168) GN=hemAT PE=1 SV=1	389	48738	60.33	LDEIAQQIEK
200	1::sw|O07621|HEMAT_BACSU	Heme-based aerotactic transducer HemAT OS=Bacillus subtilis (strain 168) GN=hemAT PE=1 SV=1	389	48738	68.74	LDEIAQQIEK
[truncated: 14,919 more rows]

## Sheet: S2d
Table S2: Proteins identified in the Bacillus subtilis vegetative cell membrane fraction
[truncated: 13,572 more rows]
